# Supplementary material for: Cobalt-catalyzed C–H activation and regioselective intermolecular annulation with allenes
Source: Royal Society of Chemistry journal article supplement (doi:10.1039/c6qo00567e), 2016-11-08
Supplement: c6qo00567e2.pdf [file c6qo00567e2.pdf]

# Supporting Information

## Cobalt-catalyzed C-H Activation and Regioselective Intermolecular Annulation with Allenes

Tianlei Li<sup>1,2‡</sup>, Chao Zhang<sup>2‡</sup>, Yonghua Tan<sup>2</sup>, Weidong Pan<sup>3</sup> and Yu Rao<sup>1\*</sup>

<sup>1</sup>MOE Key Laboratory of Protein Sciences, School of Pharmaceutical Sciences, Tsinghua University,  
Beijing 100084, China

<sup>2</sup>Tsinghua-Peking Center for Life Sciences, Haidian Dist., Beijing 100084, China;

<sup>3</sup>The Key Laboratory of Chemistry for Natural Products of Guizhou Province and Chinese Academy  
of Sciences, Guiyang 550002, China

[yrao@mail.tsinghua.edu.cn](mailto:yrao@mail.tsinghua.edu.cn)

| Table of Contents     | Page   |
|-----------------------|--------|
| Materials and Methods | 2      |
| Optimization          | 2-5    |
| General procedure     | 5-6    |
| Date of products      | 7-40   |
| Spectra               | 41-147 |

## Materials and Methods

All commercial materials (Alfa Aesar, Aladdin, J&K Chemical LTD.) were used without further purification. All solvents were analytical grade. The potassium persulfate were ground to powder. The  $^1\text{H}$  NMR and  $^{13}\text{C}$  NMR spectra were recorded on a Bruker AVANCE<sup>III</sup> 400 MHz spectrometer in  $\text{CDCl}_3$  using TMS or solvent peak as a standard. All  $^{13}\text{C}$  NMR spectra were recorded with complete proton decoupling. Low-resolution mass spectral analyses were performed with a Waters AQUITY UPLC<sup>TM</sup>/MS. All reactions were carried out in sealed tube with Teflon cap. Analytical TLC was performed on Yantai Chemical Industry Research Institute silica gel 60 F254 plates and flash column chromatography was performed on Qingdao Haiyang Chemical Co. Ltd silica gel 60 (200-300mesh). The rotavapor was BUCHI's Rotavapor R-3.

### 1. Optimization of cobalt-catalyzed $\text{sp}^2$ C-H functionalization

#### 1.1 Catalyst screening:

General procedure:

A sealed tube with a screw cap (PTFE) was charged with 4-bromo-N-(quinolin-8-yl) benzamide (32.6 mg, 0.1 mmol),  $\text{Mn}(\text{OAc})_2$  (34.7 mg, 0.2 mmol, 2 equiv.), KOAc (19.8 mg, 0.2 mmol, 2 equiv.), Catalysts (0.02 mmol, 20 mol%),  $\text{CF}_3\text{CH}_2\text{OH}$  (1.0 mL), and ethyl 2-methylbuta-2,3-dienoate (37.8 mg, 0.3 mmol, 3.0 equiv.) under oxygen atmosphere. Resulting mixture was heated at corresponding temperature for 12 – 18 h, cooled to room temperature and analyzed by TLC (Petroleum ether:Ethyl acetate 4:1, Petroleum ether:Ethyl acetate = 1:1) and  $^1\text{H}$ -NMR spectroscopy.

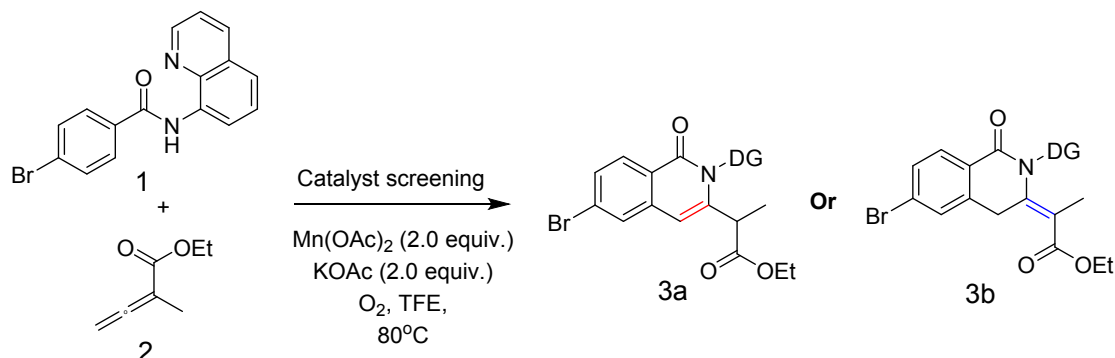

| entry | catalyst                                 | 3a<br>yield <sup>a</sup> (%) | 3b<br>yield <sup>a</sup> (%) |
|-------|------------------------------------------|------------------------------|------------------------------|
| 1     | $\text{Pd}(\text{acac})_2$               | N.O.                         | N.O.                         |
| 2     | (1,5-Cyclooctadiene)(methoxy)iridium (I) | N.O.                         | N.O.                         |
| 3     | $\text{Fe}(\text{acac})_3$               | N.O.                         | N.O.                         |
| 4     | $\text{Ni}(\text{acac})_2$               | N.O.                         | N.O.                         |
| 5     | $[\text{Cp}^*\text{RhCl}_2]_2$           | N.O.                         | N.O.                         |
| 6     | Without catalyst                         | N.O.                         | N.O.                         |

Note: **a)** the reaction conversion was monitored by  $^1\text{H}$ -NMR; **b)** N.O. means no observation in this reaction.

## 1.2 Bases screening:

General procedure:

A sealed tube with a screw cap (PTFE) was charged with 4-bromo-N-(quinolin-8-yl) benzamide (32.6 mg, 0.1 mmol),  $\text{Mn}(\text{OAc})_2$  (34.7 mg, 0.2 mmol, 2 equiv.), Base (0.2 mmol, 2 equiv.),  $\text{Co}(\text{acac})_2$  (5.7 mg, 0.02 mmol, 20 mol%),  $\text{CF}_3\text{CH}_2\text{OH}$  (1.0 mL), and ethyl 2-methylbuta-2,3-dienoate (37.8 mg, 0.3 mmol, 3.0 equiv.) under oxygen atmosphere. Resulting mixture was heated at corresponding temperature for 12 – 18 h, cooled to room temperature and analyzed by TLC (Petroleum ether:Ethyl acetate 4:1, Petroleum ether:Ethyl acetate = 1:1) and  $^1\text{H}$ -NMR spectroscopy.

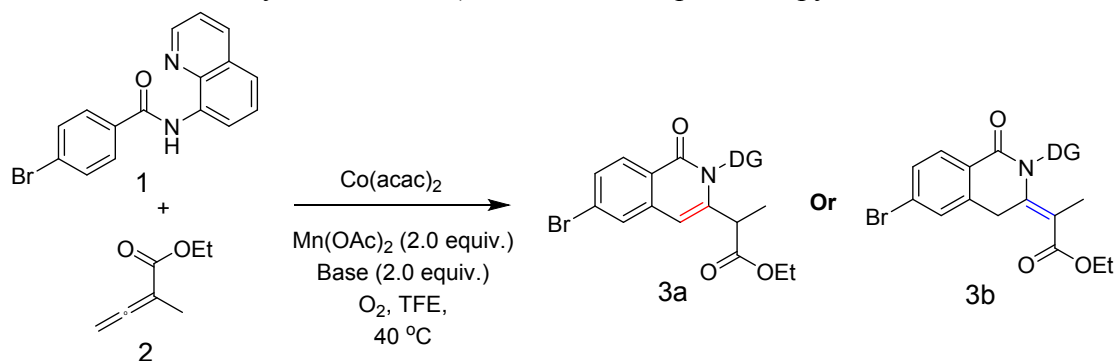

| Entry | Base                    | Temperature ( $^\circ\text{C}$ ) | time (h) | 3a yield (%) | 3b yield (%) |
|-------|-------------------------|----------------------------------|----------|--------------|--------------|
| 1     | Pyridine                | 80                               | 15       | N.O.         | N.O.         |
| 2     | DMAP                    | 80                               | 15       | N.O.         | N.O.         |
| 3     | CsOPiv                  | 40                               | 9        | 11           | 47           |
| 4     | KOTf                    | 30                               | 20       | <5           | 26           |
| 5     | KOTf                    | 40                               | 9        | <5           | 71           |
| 6     | KOTf                    | 50                               | 4        | <15          | 25           |
| 7     | KOTf                    | 60                               | 4        | <25          | 27           |
| 8     | NaOPiv                  | 80                               | 3        | 43           | <5           |
| 9     | NaOAc                   | 80                               | 4        | 51           | <5           |
| 10    | KOAc                    | 80                               | 3        | 82           | <5           |
| 11    | KOAc                    | 40                               | 9        | 43           | 13           |
| 12    | $\text{NaOCOCF}_3$      | 40                               | 12       | <30          | <15          |
| 13    | Sodium benzoate         | 40                               | 12       | <30          | <15          |
| 14    | $\text{K}_2\text{CO}_3$ | 40                               | 12       | <25          | <15          |

Note: **a)** the reaction conversion was monitored by  $^1\text{H}$ -NMR; **b)** N.O. means no observation in this reaction.

## 1.3 Oxidant screening:

A sealed tube with a screw cap (PTFE) was charged with 4-bromo-N-(quinolin-8-yl) benzamide (32.6 mg, 0.1 mmol), Oxidant (0.2 mmol, 2 equiv.), KOAc (19.8 mg, 0.2 mmol, 2 equiv.),  $\text{Co}(\text{acac})_2$  (5.7 mg, 0.02 mmol, 20 mol%),  $\text{CF}_3\text{CH}_2\text{OH}$  (1.0 mL), and ethyl 2-methylbuta-2,3-dienoate (37.8 mg, 0.3 mmol, 3.0 equiv.) under oxygen

atmosphere. Resulting mixture was heated at corresponding temperature for 12 – 18 h, cooled to room temperature and analyzed by TLC (Petroleum ether:Ethyl acetate 4:1, Petroleum ether:Ethyl acetate = 1:1) and <sup>1</sup>H-NMR spectroscopy.

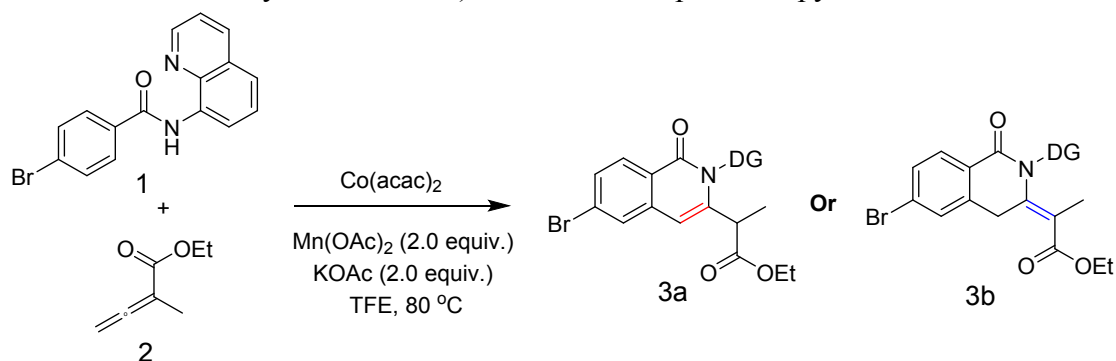

| entry | Oxidant                                      | <b>3a</b><br>yield <sup>a</sup> (%) | <b>3b</b><br>yield <sup>a</sup> (%) |
|-------|----------------------------------------------|-------------------------------------|-------------------------------------|
| 1     | K <sub>2</sub> S <sub>2</sub> O <sub>8</sub> | 23                                  | < 5                                 |
| 2     | Cu(OAc) <sub>2</sub>                         | N.O.                                | N.O.                                |
| 3     | Cu(OAc) <sub>2</sub> + O <sub>2</sub>        | N.O.                                | N.O.                                |
| 4     | Ph(OAc) <sub>2</sub> I                       | N.O.                                | N.O.                                |
| 5     | mCPBA                                        | N.O.                                | N.O.                                |
| 6     | Fe(OAc) <sub>2</sub> (II)                    | N.O.                                | N.O.                                |
| 7     | Fe(OAc) <sub>2</sub> (II) + O <sub>2</sub>   | N.O.                                | N.O.                                |
| 8     | AgOAc                                        | 37                                  | < 5                                 |
| 9     | Mn(OAc) <sub>2</sub>                         | 13                                  | < 5                                 |
| 10    | Mn(OAc) <sub>2</sub> + O <sub>2</sub>        | 82                                  | < 5                                 |
| 11    | Mn(OAc) <sub>2</sub> + air                   | 35                                  | < 5                                 |
| 12    | O <sub>2</sub>                               | 41                                  | < 5                                 |

Note: **a)** the reaction conversion was monitored by <sup>1</sup>H-NMR; **b)** N.O. means no observation in this reaction.

#### 1.4 Solvents screening:

A sealed tube with a screw cap (PTFE) was charged with 4-bromo-N-(quinolin-8-yl) benzamide (32.6 mg, 0.1 mmol), Oxidant (0.2 mmol, 2 equiv.), KOAc (19.8 mg, 0.2 mmol, 2 equiv.) or KOTf (37.8 mg, 0.2 mmol, 2 equiv.), Co(acac)<sub>2</sub> (5.7 mg, 0.02 mmol, 20 mol%), CF<sub>3</sub>CH<sub>2</sub>OH (1.0 mL), and ethyl 2-methylbuta-2,3-dienoate (37.8 mg, 0.3 mmol, 3.0 equiv) under oxygen atmosphere. Resulting mixture was heated at corresponding temperature for 12 – 18 h, cooled to room temperature and analyzed by TLC (Petroleum ether:Ethyl acetate 4:1, Petroleum ether:Ethyl acetate = 1:1) and <sup>1</sup>H-NMR spectroscopy.

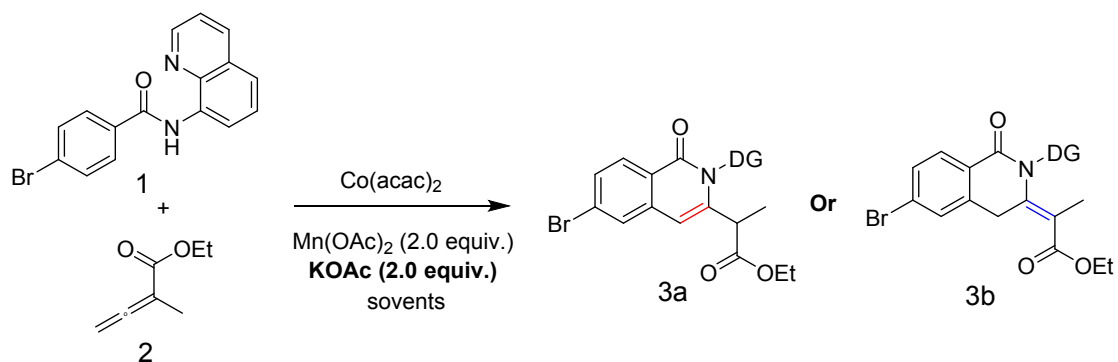

| Entry | Base                   | Temperature (°C) | time (h) | 3a yield (%)       | 3b yield (%) |
|-------|------------------------|------------------|----------|--------------------|--------------|
| 1     | MeOH                   | 80               | 4        | 27 <sup>a</sup>    | < 5          |
| 2     | EtOH                   | 80               | 4        | 35 <sup>a</sup>    | 8            |
| 3     | TFE                    | 80               | 3        | 68 <sup>a</sup>    | < 5          |
| 4     | n-butyl alcohol        | 80               | 12       | <10 <sup>b</sup>   | N.O.         |
| 5     | Trifluoromethylbenzene | 80               | 9        | <10 <sup>b</sup>   | N.O.         |
| 6     | Chlorobenzene          | 80               | 12       | N.O.               | N.O.         |
| 7     | DCE                    | 80               | 12       | < 5 <sup>b</sup>   | N.O.         |
| 8     | Dioxane                | 80               | 12       | <10 <sup>b</sup>   | N.O.         |
| 9     | HFIP                   | 80               | 5        | <20 <sup>b,c</sup> | N.O.         |

Note: 1) the reaction conversion was monitored by  $^1\text{H-NMR}$ ; 2) N.O. means no observation in this reaction; a) Isolated yields; b) reaction conversion after 12 h; c) the main product is the dimer.

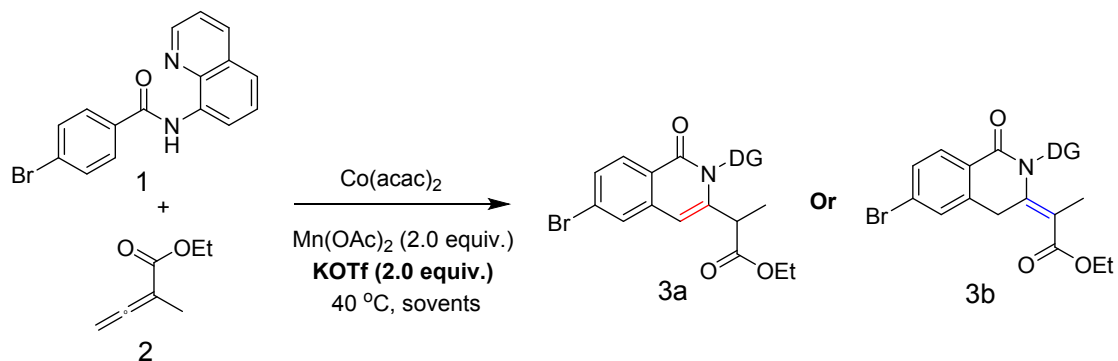

| Entry | Base                   | Temperature (°C) | time (h) | 3a yield (%) | 3b yield (%)     |
|-------|------------------------|------------------|----------|--------------|------------------|
| 1     | MeOH                   | 40               | 12       | < 5          | 31 <sup>a</sup>  |
| 2     | EtOH                   | 40               | 18       | 14           | 25 <sup>a</sup>  |
| 3     | TFE                    | 40               | 13       | 15           | 63 <sup>a</sup>  |
| 4     | n-butyl alcohol        | 40               | 12       | <10          | <10 <sup>b</sup> |
| 5     | Trifluoromethylbenzene | 40               | 12       | <15          | <15 <sup>b</sup> |
| 6     | Chlorobenzene          | 40               | 12       | <15          | <15 <sup>b</sup> |
| 7     | DCE                    | 40               | 12       | <15          | <15 <sup>b</sup> |
| 8     | Dioxane                | 40               | 12       | <10          | <20 <sup>b</sup> |

Note: 1) the reaction conversion was monitored by  $^1\text{H-NMR}$ ; 2) N.O. means no observation in this reaction; a) Isolated yields; b) reaction conversion.

## 1.5 Deuteration experiments and KIE study:

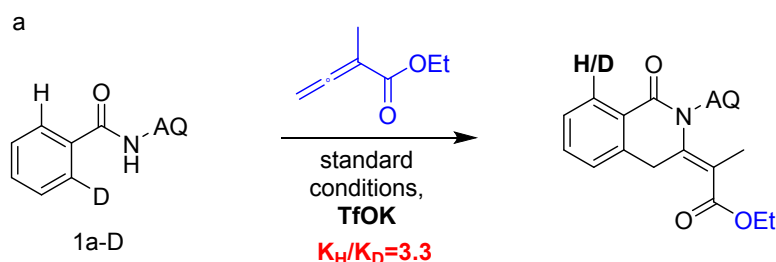

A sealed tube with a screw cap (PTFE) was charged with *N*-(quinolin-8-yl)benzamide-2-d (24.9 mg, 0.1 mmol),  $\text{Mn}(\text{OAc})_2$  (0.2 mmol, 2 equiv.), KOTf (37 mg, 0.2 mmol, 2 equiv.),  $\text{Co}(\text{acac})_2$  (5.7 mg, 0.02 mmol, 20 mol%),  $\text{CF}_3\text{CH}_2\text{OH}$  (1.0 mL), and ethyl 2-methylbuta-2,3-dienoate (37.8 mg, 0.3 mmol, 3.0 equiv) under oxygen atmosphere. Resulting mixture was heated at 40 °C for 45 min, cooled to room temperature and analyzed by TLC (Petroleum ether:Ethyl acetate 10:1, Petroleum ether:Ethyl acetate = 4:1) and  $^1\text{H}$ -NMR spectroscopy.

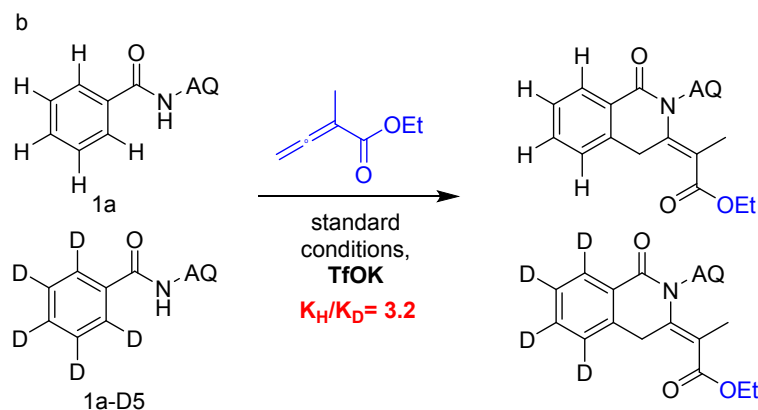

A sealed tube with a screw cap (PTFE) was charged with *N*-(quinolin-8-yl)benzamide (12.4 mg, 0.05 mmol) and *N*-(quinolin-8-yl)benzamide-2,3,4,5,6-d<sub>5</sub> (12.7 mg, 0.05 mmol),  $\text{Mn}(\text{OAc})_2$  (0.2 mmol, 2 equiv.), KOTf (37.8 mg, 0.2 mmol, 2 equiv.),  $\text{Co}(\text{acac})_2$  (5.7 mg, 0.02 mmol, 20 mol%),  $\text{CF}_3\text{CH}_2\text{OH}$  (1.0 mL), and ethyl 2-methylbuta-2,3-dienoate (37.8 mg, 0.3 mmol, 3.0 equiv) under oxygen atmosphere. Resulting mixture was heated at corresponding temperature for 45 min, cooled to room temperature and analyzed by TLC (Petroleum ether:Ethyl acetate 10:1, Petroleum ether:Ethyl acetate = 4:1) and  $^1\text{H}$ -NMR spectroscopy.

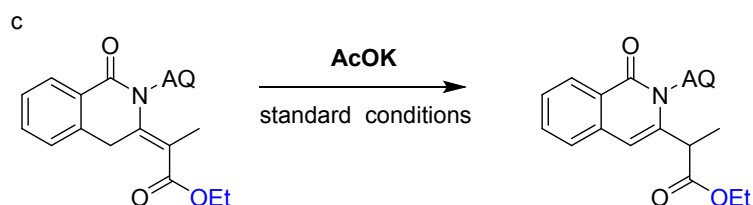

A sealed tube with a screw cap (PTFE) was charged with ethyl (*E*)-2-(1-oxo-2-(quinolin-8-yl)-1,4-dihydroisoquinolin-3(2*H*)-ylidene)propanoate (37 mg, 0.1 mmol),  $\text{Mn}(\text{OAc})_2$  (0.2 mmol, 2 equiv.), KOAc (20 mg, 0.2 mmol, 2 equiv.),  $\text{Co}(\text{acac})_2$  (5.7 mg, 0.02 mmol, 20 mol%), and  $\text{CF}_3\text{CH}_2\text{OH}$  (1.0 mL) under oxygen atmosphere, then

the reaction mixture was stirred at 80 °C until the complete consumption as monitored by TLC analysis. The reaction mixture was then diluted with EtOAc (10 mL) and washed with saturated brine. The aqueous phase was extracted with EtOAc again. The organic layer was combined, washed with brine and dried over Na<sub>2</sub>SO<sub>4</sub>. The mixture was purified by flash column chromatography on silica with an appropriate solvent to afford the desired product.

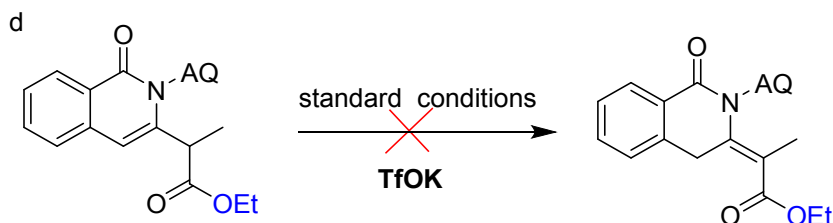

A sealed tube with a screw cap (PTFE) was charged with ethyl ethyl 2-(1-oxo-2-(quinolin-8-yl)-1,2-dihydroisoquinolin-3-yl)propanoate (37 mg, 0.1 mmol), Mn(OAc)<sub>2</sub> (0.2 mmol, 2 equiv.), KOAc (20 mg, 0.2 mmol, 2 equiv.), Co(acac)<sub>2</sub> (5.7 mg, 0.02 mmol, 20 mol%), and CF<sub>3</sub>CH<sub>2</sub>OH (1.0 mL) under oxygen atmosphere, then the reaction mixture was stirred at 80 °C until the complete consumption as monitored by TLC analysis. The reaction mixture was then diluted with EtOAc (10 mL) and washed with saturated brine. The aqueous phase was extracted with EtOAc again. The organic layer was combined, washed with brine and dried over Na<sub>2</sub>SO<sub>4</sub>. The mixture was purified by flash column chromatography on silica with an appropriate solvent to afford the starting material.

## Synthesis of N-(quinolin-8-yl)benzamide analogues

|                                                                                   |                                                                                   |                                                                                   |                                                                                    |                                                                                     |
|-----------------------------------------------------------------------------------|-----------------------------------------------------------------------------------|-----------------------------------------------------------------------------------|------------------------------------------------------------------------------------|-------------------------------------------------------------------------------------|
| 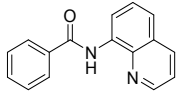 | 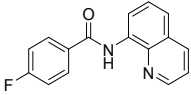 | 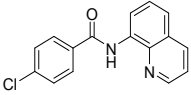 | 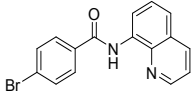 | 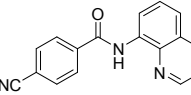 |
| 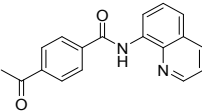 | 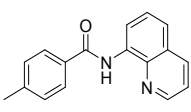 | 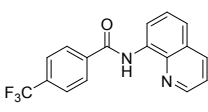 | 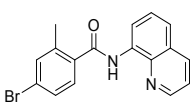 | 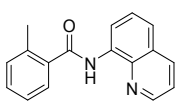 |
| 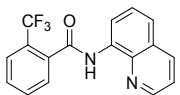 | 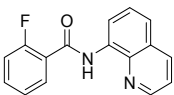 | 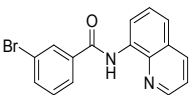 | 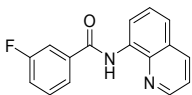 | 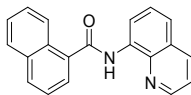 |
| 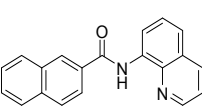 |                                                                                   |                                                                                   |                                                                                    |                                                                                     |

## Synthesis of Allenes

|                                                                                     |                                                                                     |                                                                                     |                                                                                      |                                                                                       |
|-------------------------------------------------------------------------------------|-------------------------------------------------------------------------------------|-------------------------------------------------------------------------------------|--------------------------------------------------------------------------------------|---------------------------------------------------------------------------------------|
| 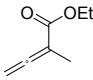 | 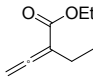 | 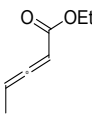 | 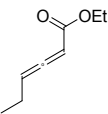 | 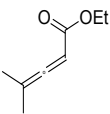 |
| 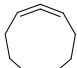 | 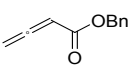 | 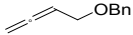 | 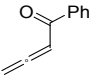 |                                                                                       |

### **I. General Procedure for the *exo*- Synthesis:**

The Co(acac)<sub>2</sub> (20 mol%), Mn(OAc)<sub>2</sub> (2.0 equiv.), KOTf (2.0 equiv.) and benzamide substrate 1 (1.0 equiv.) was dissolved in 2,2,2-trifluoroethanol (1.0 mL) in a sealed tube. Allene (3.0 equiv.) was subsequently slowly added at room temperature. Resulting solution was purged with O<sub>2</sub> balloon for 0.5 min, then the reaction mixture was stirred at 40 °C until the complete consumption of 2 as monitored by TLC analysis. The reaction mixture was then diluted with EtOAc (10 mL) and washed with saturated brine. The aqueous phase was extracted with EtOAc again. The organic layer was combined, washed with brine and dried over Na<sub>2</sub>SO<sub>4</sub>. The mixture was purified by flash column chromatography on silica with an appropriate solvent to afford the pure product.

### **II. General Procedure for the *endo*- Synthesis:**

The Co(acac)<sub>2</sub> (20 mol%), Mn(OAc)<sub>2</sub> (2.0 equiv.), KOAc (2.0 equiv.) and benzamide substrate 1 (1.0 equiv.) was dissolved in 2,2,2-trifluoroethanol (1.0 mL) in a sealed tube. Allene (3.0 equiv.) was subsequently slowly added at room temperature. Resulting solution was purged with O<sub>2</sub> balloon for 0.5 min, then the reaction mixture was stirred at 80 °C until the complete consumption of 1 as monitored by TLC analysis. The reaction mixture was then diluted with EtOAc (10 mL) and washed with saturated brine. The aqueous phase was extracted with EtOAc again. The organic layer was combined, washed with brine and dried over Na<sub>2</sub>SO<sub>4</sub>. The mixture was purified by flash column chromatography on silica with an appropriate solvent to afford the pure product.

### III. Data of Products

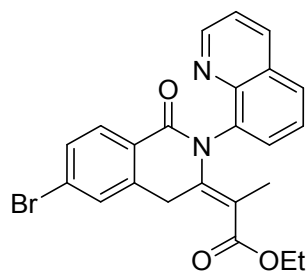

#### **Ethyl (E)-2-(6-bromo-1-oxo-2-(quinolin-8-yl)-1,4-dihydroisoquinolin-3(2H)-ylidene)propanoate (3a)**

Following the general procedure I, 4-bromo-*N*-(quinolin-8-yl)benzamide (33 mg, 0.1 mmol), ethyl 2-methylbuta-2,3-dienoate (38 mg, 0.3 mmol), Co(acac)<sub>2</sub> (5.4 mg, 0.02 mmol), Mn(OAc)<sub>2</sub> (35 mg, 0.2 mmol), KOTf (37 mg, 0.2 mmol), and TFE 2.0 ml were used. Resulting solution was purged with O<sub>2</sub> balloon for 0.5 min, then the reaction mixture was stirred at 40 °C for 5 h. After completion of the reaction, the reaction mixture was diluted with EtOAc and washed once with saturated aqueous NaHCO<sub>3</sub>. Then organic layer was dried over Na<sub>2</sub>SO<sub>4</sub> and concentrated on rotavapor under reduced pressure. Finally, the residue was purified by silica gel column chromatography (Petroleum ether:Ethyl acetate = 4:1) to **3** (32 mg) in 71% yield. <sup>1</sup>H-NMR (400 MHz, CDCl<sub>3</sub>) δ (ppm) 8.87 (d, *J* = 2.0 Hz, 1H), 8.17 (d, *J* = 8.0 Hz, 1H), 7.94 (m, 2H), 7.81 (d, *J* = 8.4 Hz, 1H), 7.63 (t, *J* = 7.6 Hz, 1H), 7.51 (m, 2H), 7.41 (m, 1H), 4.83 (d, *J* = 13.6 Hz, 1H), 4.45 (d, *J* = 13.6 Hz, 1H), 4.14 (m, 2H), 1.25 (t, *J* = 7.2 Hz, 3H), 1.24 (m, 6H). <sup>13</sup>C-NMR (100 MHz, CDCl<sub>3</sub>) δ (ppm) 169.0, 163.8, 150.1, 147.7, 143.4, 139.6, 138.1, 136.3, 131.1, 130.5, 130.4, 129.8, 129.2, 127.7, 127.6, 127.5, 125.8, 121.6, 116.9, 60.7, 34.5, 15.8, 14.3; MS (ESI) calcd for C<sub>23</sub>H<sub>19</sub>BrN<sub>2</sub>O<sub>3</sub> [M+H]<sup>+</sup>: 451.06, found: 451.02.

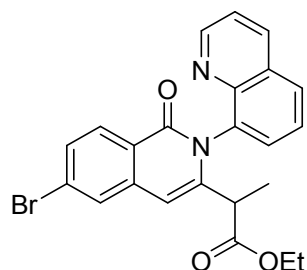

#### **Ethyl 2-(6-bromo-1-oxo-2-(quinolin-8-yl)-1,2-dihydroisoquinolin-3-yl)propanoate (3b)**

Following the general procedure II, 4-bromo-*N*-(quinolin-8-yl)benzamide (32.6 mg, 0.1 mmol), ethyl 2-methylbuta-2,3-dienoate (37.8 mg, 0.3 mmol), Co(acac)<sub>2</sub> (5.4 mg, 0.02 mmol), Mn(OAc)<sub>2</sub> (35 mg, 0.2 mmol), KOAc (19.8 mg, 0.2 mmol), and TFE 1.0 ml were used. Resulting solution was purged with O<sub>2</sub> balloon for 0.5 min, then the reaction mixture was stirred at 40 °C for 9.0 h. After completion of the reaction, the reaction mixture was diluted with EtOAc and washed once with saturated brine. Then organic layer was dried over Na<sub>2</sub>SO<sub>4</sub> and concentrated on rotavapor under reduced pressure. Finally, the residue was purified by silica gel column chromatography (Petroleum

ether:Ethyl acetate = 1:1) to **3b** (including two fraction 1F and 2F) (37 mg) in 82% yield. **3b-1F** <sup>1</sup>H-NMR (400 MHz, CDCl<sub>3</sub>) δ (ppm) 8.85 (m, 1H), 8.25 (d, *J* = 8.4 Hz, 1H), 8.22 (d, *J* = 8.8 Hz, 1H), 8.00 (dd, *J* = 1.6 Hz, *J* = 8.0 Hz, 1H), 7.78 (s, 1H), 7.68-7.66 (m, 2H), 7.56 (dd, *J* = 1.6 Hz, *J* = 8.8 Hz, 1H), 7.47 (q, *J* = 4.0 Hz, 1H), 6.57 (s, 1H), 3.97 (m, 2H), 3.12 (q, *J* = 7.2 Hz, 1H), 1.37 (d, *J* = 7.2 Hz, 3H), 1.11 (t, *J* = 7.2 Hz, 3H). <sup>13</sup>C-NMR (100 MHz, CDCl<sub>3</sub>) δ (ppm) 172.9, 163.2, 151.6, 144.6, 144.2, 138.7, 136.6, 135.5, 131.6, 130.2, 130.0, 129.8, 129.5, 128.7, 127.8, 126.4, 124.2, 122.2, 103.6, 61.4, 42.7, 17.2, 14.1; MS (ESI) calcd for C<sub>23</sub>H<sub>19</sub>BrN<sub>2</sub>O<sub>3</sub> [M+H]<sup>+</sup>: 451.06, found: 450.92. **3b-2F** <sup>1</sup>H-NMR (400 MHz, CDCl<sub>3</sub>) δ (ppm) 8.85 (d, *J* = 2.8 Hz, 1H), 8.23 (m 2H), 8.00 (d, *J* = 4.8 Hz, 1H), 7.75 (s, 1H), 7.70 (m, 2H), 7.54 (d, *J* = 8.8 Hz, 1H), 7.44 (q, *J* = 4.0 Hz, 1H), 6.64 (s, 1H), 3.84-3.76 (m, 1H), 3.68-3.61 (m, 1H), 3.22 (q, *J* = 7.2 Hz, 1H), 1.36 (d, *J* = 7.2 Hz, 3H), 0.95 (t, *J* = 7.2 Hz, 3H). <sup>13</sup>C-NMR (100 MHz, CDCl<sub>3</sub>) δ (ppm) 172.1, 163.2, 151.3, 144.7, 144.5, 138.7, 136.2, 136.0, 130.2, 130.0, 129.9, 129.6, 128.7, 127.8, 126.4, 124.1, 122.1, 103.7, 61.1, 42.6, 18.7, 13.8; MS (ESI) calcd for C<sub>23</sub>H<sub>19</sub>BrN<sub>2</sub>O<sub>3</sub> [M+H]<sup>+</sup>: 451.06, found: 450.92.

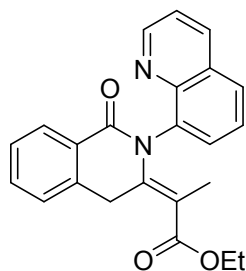

**Ethyl(*E*)-2-(1-oxo-2-(quinolin-8-yl)-1,4-dihydroisoquinolin-3(2*H*) ylidene)propanoate (**4a**)**

Following the general procedure I, *N*-(quinolin-8-yl)benzamide (24.8 mg, 0.1 mmol), ethyl 2-methylbuta-2,3-dienoate (37.8 mg, 0.3 mmol), Co(acac)<sub>2</sub> (5.4 mg, 0.02 mmol), Mn(OAc)<sub>2</sub> (35 mg, 0.2 mmol), KOTf (39.8 mg, 0.2 mmol), and TFE 1.0 ml were used. Resulting solution was purged with O<sub>2</sub> balloon for 0.5 min, then the reaction mixture was stirred at 40 °C for 9.0 h. After completion of the reaction, the reaction mixture was diluted with EtOAc and washed once with saturated brine. Then organic layer was dried over Na<sub>2</sub>SO<sub>4</sub> and concentrated on rotavapor under reduced pressure. Finally, the residue was purified by silica gel column chromatography (Petroleum ether:Ethyl acetate = 4:1) to **4a** (24 mg) in 65% yield. <sup>1</sup>H-NMR (400 MHz, CDCl<sub>3</sub>) δ (ppm) 8.88 (d, *J* = 2.4 Hz, 1H), 8.16 (d, *J* = 8.4 Hz, 1H), 8.10 (d, *J* = 7.6 Hz, 1H), 7.94 (d, *J* = 7.2 Hz, 1H), 7.81 (d, *J* = 8.0 Hz, 1H), 7.63 (t, *J* = 8.0 Hz, 1H), 7.50 (t, *J* = 7.2 Hz, 1H), 7.41-7.36 (m, 2H), 7.33 (d, *J* = 7.6 Hz, 1H), 4.85 (d, *J* = 15.6 Hz, 1H), 4.67 (d, *J* = 15.6 Hz, 1H), 4.17-4.12 (m, 2H), 1.28-1.22 (m, 6H). <sup>13</sup>C-NMR (100 MHz, CDCl<sub>3</sub>) δ (ppm) 169.3, 164.5, 150.2, 148.7, 143.6, 148.5, 137.7, 136.3, 132.7, 131.2, 129.2, 128.8, 128.7, 127.7, 127.1, 126.8, 126.0, 121.6, 60.7, 34.9, 15.9, 14.0; MS (ESI) calcd for C<sub>23</sub>H<sub>20</sub>N<sub>2</sub>O<sub>3</sub> [M+H]<sup>+</sup>: 373.15, found: 373.19.

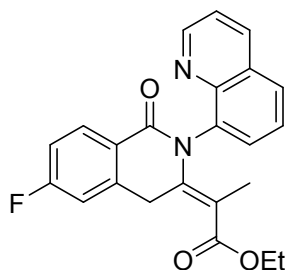

**Ethyl (*E*)-2-(6-fluoro-1-oxo-2-(quinolin-8-yl)-1,4-dihydroisoquinolin-3(2*H*)-ylidene)propanoate (**4b**)**

Following the general procedure I, 4-fluoro-*N*-(quinolin-8-yl)benzamide (26.6 mg, 0.1 mmol), ethyl 2-methylbuta-2,3-dienoate (37.8 mg, 0.3 mmol), Co(acac)<sub>2</sub> (5.4 mg, 0.02 mmol), Mn(OAc)<sub>2</sub> (35 mg, 0.2 mmol), KOTf (39.8 mg, 0.2 mmol), and TFE 1.0 ml were used. Resulting solution was purged with O<sub>2</sub> balloon for 0.5 min, then the reaction mixture was stirred at 40 °C for 9.0 h. After completion of the reaction, the reaction mixture was diluted with EtOAc and washed once with saturated brine. Then organic layer was dried over Na<sub>2</sub>SO<sub>4</sub> and concentrated on rotavapor under reduced pressure. Finally, the residue was purified by silica gel column chromatography (Petroleum ether:Ethyl acetate = 4:1) to **4b** (23 mg) in 59% yield. <sup>1</sup>H-NMR (400 MHz, CDCl<sub>3</sub>) δ (ppm) 8.87 (dd, *J* = 8.4 Hz, *J* = 1.6 Hz, 1H), 8.17 (dd, *J* = 8.4 Hz, *J* = 1.6 Hz, 1H), 8.11 (dd, *J* = 8.4 Hz, *J* = 6.0 Hz, 1H), 7.94 (d, *J* = 7.2 Hz, 1H), 7.81 (d, *J* = 7.2 Hz, 1H), 7.63 (t, *J* = 8.0 Hz, 1H), 7.40 (t, *J* = 8.0 Hz, 1H), 7.08-7.02 (m, 2H), 4.87 (d, *J* = 15.6 Hz, 1H), 4.66 (d, *J* = 16.0 Hz, 1H), 4.17-4.10 (m, 2H), 1.26 (t, *J* = 7.2 Hz, 6H). <sup>13</sup>C-NMR (100 MHz, CDCl<sub>3</sub>) δ (ppm) 169.1, 166.7, 163.7, 150.2, 148.0, 143.5, 140.8, 140.7, 138.2, 136.3, 131.7, 131.6, 131.3, 129.2, 127.7, 125.8, 125.0, 121.6, 116.7, 114.6, 114.4, 113.8, 113.6, 60.8, 34.8, 15.9, 14.3; MS (ESI) calcd for C<sub>23</sub>H<sub>19</sub>FN<sub>2</sub>O<sub>3</sub> [M+H]<sup>+</sup>: 391.14, found 391.06.

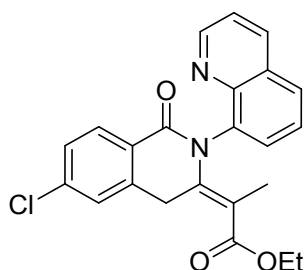

**Ethyl(*E*)-2-(6-chloro-1-oxo-2-(quinolin-8-yl)-1,4-dihydroisoquinolin-3(2*H*)-ylidene)propanoate (**4c**)**

Following the general procedure I, 4-chloro-*N*-(quinolin-8-yl)benzamide (29 mg, 0.1 mmol), ethyl 2-methylbuta-2,3-dienoate (39 mg, 0.3 mmol), Co(acac)<sub>2</sub> (2.7 mg, 0.02 mmol), Mn(OAc)<sub>2</sub> (35 mg, 0.2 mmol), KOTf (37 mg, 0.2 mmol), and TFE 1.5 ml were used. Resulting solution was purged with O<sub>2</sub> balloon for 0.5 min, then the reaction mixture was stirred at 40 °C for 13 h. After completion of the reaction, the reaction mixture was diluted with EtOAc and washed once with saturated aqueous NaHCO<sub>3</sub>. Then organic layer was dried over Na<sub>2</sub>SO<sub>4</sub> and concentrated on rotavapor under reduced pressure. Finally, the residue was purified by silica gel column chromatography

(Petroleum ether:Ethyl acetate = 4:1) to **4c** (24.4 mg) in 61% yield. <sup>1</sup>H-NMR (400 MHz, CDCl<sub>3</sub>) δ (ppm) 8.89-8.87 (m, 1H), 8.18 (dd, *J* = 8.4 Hz, *J* = 1.2 Hz, 2H), 8.03 (d, *J* = 8.4 Hz, 1H), 7.93 (d, *J* = 7.6 Hz, 1H), 7.82 (d, *J* = 8.0 Hz, 1H), 7.63 (t, *J* = 8.0 Hz, 1H), 7.42-7.39 (m, 1H), 7.36-7.34 (m, 2H), 4.87-4.83 (m, 1H), 4.66-4.62 (m, 1H), 4.17-4.11 (m, 2H), 1.28-1.23 (m, 6H); <sup>13</sup>C-NMR (100 MHz, CDCl<sub>3</sub>) δ (ppm) 169.1, 163.7, 150.2, 147.8, 143.4, 139.5, 138.8, 138.1, 136.3, 131.1, 130.3, 129.2, 127.8, 127.5, 127.2, 126.9, 125.8, 121.6, 116.9, 60.8, 34.5, 15.9, 14.3; MS (ESI) calcd for C<sub>23</sub>H<sub>19</sub>ClN<sub>2</sub>O<sub>3</sub> [M+H]<sup>+</sup>: 406.11, found 407.05.

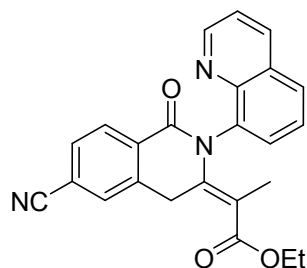

**Ethyl(*E*)-2-(6-cyano-1-oxo-2-(quinolin-8-yl)-1,4-dihydroisoquinolin-3(2*H*)-ylidene)propanoate (**4d**)**

Following the general procedure I, 4-cyano-*N*-(quinolin-8-yl)benzamide (14 mg, 0.05 mmol), ethyl 2-methylbuta-2,3-dienoate (19 mg, 0.15 mmol), Co(acac)<sub>2</sub> (2.7 mg, 0.01 mmol), Mn(OAc)<sub>2</sub> (18 mg, 0.1 mmol), KOTf (19 mg, 0.1 mmol), and TFE 1.5 ml were used. Resulting solution was purged with O<sub>2</sub> balloon for 0.5 min, then the reaction mixture was stirred at 30 °C for 13 h. After completion of the reaction, the reaction mixture was diluted with EtOAc and washed once with saturated aqueous NaHCO<sub>3</sub>. Then organic layer was dried over Na<sub>2</sub>SO<sub>4</sub> and concentrated on rotavapor under reduced pressure. Finally, the residue was purified by silica gel column chromatography (Petroleum ether:Ethyl acetate = 4:1) to **4d** (15 mg) in 70% yield. <sup>1</sup>H-NMR (400 MHz, CDCl<sub>3</sub>) δ (ppm) 8.88 (d, *J* = 2.0 Hz, 1H), 8.19 (d, *J* = 8.0 Hz, 2H), 7.94 (d, *J* = 7.2 Hz, 1H), 7.84 (d, *J* = 8.0 Hz, 1H), 7.68-7.63 (m, 3H), 7.44-7.41 (m, 1H), 4.90 (d, *J* = 14.8 Hz, 1H), 4.72 (d, *J* = 14.8 Hz, 1H), 4.16-4.11 (m, 2H), 1.27-1.23 (m, 6H). <sup>13</sup>C-NMR (100 MHz, CDCl<sub>3</sub>) δ (ppm) 168.9, 163.0, 150.3, 146.6, 143.3, 138.9, 137.8, 136.4, 132.5, 131.0, 130.7, 130.5, 129.5, 129.3, 128.0, 125.9, 121.8, 118.3, 117.8, 116.0, 61.0, 34.4, 15.9, 14.3; MS (ESI) calcd for C<sub>24</sub>H<sub>19</sub>N<sub>3</sub>O<sub>3</sub> [M+H]<sup>+</sup>: 398.14, found: 398.37.

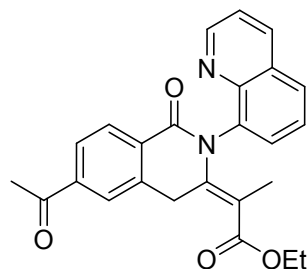

**Ethyl (*E*)-2-(6-acetyl-1-oxo-2-(quinolin-8-yl)-1,4-dihydroisoquinolin-3(2*H*)-ylidene)propanoate (**4e**)**

Following the general procedure I, 4-acetyl-*N*-(quinolin-8-yl)benzamide (29 mg, 0.1

mmol), ethyl 2-methylbuta-2,3-dienoate (38 mg, 0.3 mmol), Co(acac)<sub>2</sub> (5.4 mg, 0.02 mmol), Mn(OAc)<sub>2</sub> (35 mg, 0.2 mmol), KOTf (25 mg, 0.13 mmol), KOAc (10 mg, 0.1 mmol), and TFE 1.5 ml were used. Resulting solution was purged with O<sub>2</sub> balloon for 0.5 min, then the reaction mixture was stirred at 40 °C for 6.5 h. After completion of the reaction, the reaction mixture was diluted with EtOAc and washed once with saturated aqueous NaHCO<sub>3</sub>. Then organic layer was dried over Na<sub>2</sub>SO<sub>4</sub> and concentrated on rotavapor under reduced pressure. Finally, the residue was purified by silica gel column chromatography (Petroleum ether:Ethyl acetate = 4:1) to **4e** (25 mg) in 61% yield. <sup>1</sup>H-NMR (400 MHz, CDCl<sub>3</sub>) δ (ppm) 8.90-8.88 (m, 1H), 8.19 (d, *J* = 8.0 Hz, 2H), 7.95-7.92 (m, 3H), 7.83 (d, *J* = 7.6 Hz, 1H), 7.64 (t, *J* = 7.6 Hz, 1H), 7.43-7.40 (m, 1H), 4.93-4.89 (m, 1H), 4.73-4.69 (m, 1H), 4.18-4.10 (m, 2H), 2.66 (s, 3H), 1.28-1.24 (m, 6H); <sup>13</sup>C-NMR (100 MHz, CDCl<sub>3</sub>) δ (ppm) 197.8, 169.1, 163.4, 150.3, 147.6, 143.4, 140.0, 138.11, 138.08, 136.4, 132.4, 130.9, 129.2, 129.1, 127.9, 126.9, 126.7, 125.9, 121.6, 117.1, 60.9, 34.8, 27.1, 15.9, 14.3; MS (ESI) calcd for C<sub>25</sub>H<sub>22</sub>N<sub>2</sub>O<sub>4</sub> [M+H]<sup>+</sup>: 414.16, found 415.09.

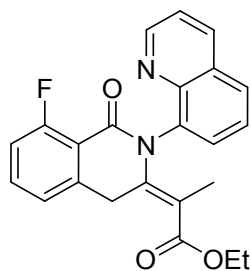

**Ethyl (*E*)-2-(8-fluoro-1-oxo-2-(quinolin-8-yl)-1,4-dihydroisoquinolin-3(2*H*)-ylidene)propanoate (**4f**)**

Following the general procedure I, 2-fluoro-N-(quinolin-8-yl)benzamide (27 mg, 0.1 mmol), ethyl 2-methylbuta-2,3-dienoate (38 mg, 0.3 mmol), Co(acac)<sub>2</sub> (5.4 mg, 0.02 mmol), Mn(OAc)<sub>2</sub> (35 mg, 0.2 mmol), KOTf (19 mg, 0.1 mmol), KOAc (10 mg, 0.1 mmol), and TFE 1.5 ml were used. Resulting solution was purged with O<sub>2</sub> balloon for 0.5 min, then the reaction mixture was stirred at 40 °C for 10 h. After completion of the reaction, the reaction mixture was diluted with EtOAc and washed once with saturated aqueous NaHCO<sub>3</sub>. Then organic layer was dried over Na<sub>2</sub>SO<sub>4</sub> and concentrated on rotavapor under reduced pressure. Finally, the residue was purified by silica gel column chromatography (Petroleum ether:Ethyl acetate = 4:1) to **4f** (21 mg) in 54% yield. <sup>1</sup>H-NMR (400 MHz, CDCl<sub>3</sub>) δ (ppm) 8.87 (d, *J* = 2.0 Hz, 1H), 8.16 (d, *J* = 8.0 Hz, 1H), 7.92 (d, *J* = 7.2 Hz, 1H), 7.80 (d, *J* = 8.0 Hz, 1H), 7.62 (t, *J* = 7.6 Hz, 1H), 7.41 (m, 2H), 7.12 (d, *J* = 7.6 Hz, 1H), 7.06 (t, *J* = 9.6 Hz, 1H), 4.88 (d, *J* = 15.2 Hz, 1H), 4.13 (d, *J* = 15.2 Hz, 1H), 4.12 (m, 2H), 1.29 (m, 3H), 1.24 (t, *J* = 7.2 Hz, 6H). <sup>13</sup>C-NMR (100 MHz, CDCl<sub>3</sub>) δ (ppm) 169.1, 162.4 (d, *J* = 221.0 Hz, 1C), 160.9, 150.2, 148.0, 143.5, 140.3, 137.9, 136.3, 133.8 (d, *J* = 9.0 Hz, 1C), 131.3, 129.3, 127.7, 125.9, 122.5 (d, *J* = 3.0 Hz, 1C), 121.6, 117.2, 116.6, 115.5 (d, *J* = 22.0 Hz, 1C), 60.7, 35.3, 15.8, 14.3; MS (ESI) calcd for C<sub>23</sub>H<sub>19</sub>FN<sub>2</sub>O<sub>3</sub> [M+H]<sup>+</sup>: 391.14, found: 391.06.

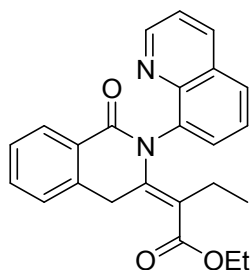

**Ethyl (*E*)-2-(1-oxo-2-(quinolin-8-yl)-1,4-dihydroisoquinolin-3(2*H*)-ylidene)butanoate (**4g**)**

Following the general procedure I, *N*-(quinolin-8-yl)benzamide (24.8 mg, 0.1 mmol), ethyl 2-ethylbuta-2,3-dienoate (42 mg, 0.3 mmol), Co(acac)<sub>2</sub> (5.4 mg, 0.02 mmol), Mn(OAc)<sub>2</sub> (35 mg, 0.2 mmol), KOTf (39.8 mg, 0.2 mmol), and TFE 1.0 ml were used. Resulting solution was purged with O<sub>2</sub> balloon for 0.5 min, then the reaction mixture was stirred at 40 °C for 9.0 h. After completion of the reaction, the reaction mixture was diluted with EtOAc and washed once with saturated brine. Then organic layer was dried over Na<sub>2</sub>SO<sub>4</sub> and concentrated on rotavapor under reduced pressure. Finally, the residue was purified by silica gel column chromatography (Petroleum ether:Ethyl acetate = 1:1) to **4g** (24 mg) in 62% yield. <sup>1</sup>H-NMR (400 MHz, CDCl<sub>3</sub>) δ (ppm) 8.91 (d, *J* = 2.4 Hz, 1H), 8.16 (d, *J* = 8.0 Hz, 1H), 8.10 (d, *J* = 7.6 Hz, 1H), 8.01 (d, *J* = 7.2 Hz, 1H), 7.83 (d, *J* = 8.0 Hz, 1H), 7.64 (t, *J* = 8.0 Hz, 1H), 7.50 (t, *J* = 7.6 Hz, 1H), 7.41-7.36 (m, 2H), 7.30 (d, *J* = 7.6 Hz, 1H), 4.84 (d, *J* = 15.6 Hz, 1H), 4.47 (d, *J* = 16.0 Hz, 1H), 4.18 (dd, *J* = 14.0 Hz, *J* = 6.8 Hz, 2H), 2.14-1.90 (m, 2H), 1.26 (t, *J* = 7.2 Hz, 3H), -0.12 (t, *J* = 7.2 Hz, 3H). <sup>13</sup>C-NMR (100 MHz, CDCl<sub>3</sub>) δ (ppm) 169.2, 164.5, 150.3, 146.9, 143.7, 139.1, 138.0, 136.1, 132.7, 131.1, 129.3, 128.8, 127.7, 127.1, 126.7, 126.0, 123.5, 121.5, 60.6, 35.3, 22.6, 14.3, 10.5; MS (ESI) calcd for C<sub>24</sub>H<sub>22</sub>N<sub>2</sub>O<sub>3</sub> [M+H]<sup>+</sup>: 387.16, found: 387.11.

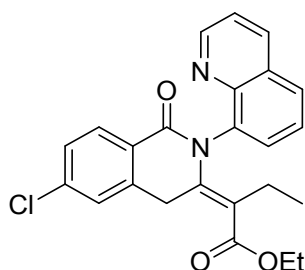

**Ethyl (*E*)-2-(6-chloro-1-oxo-2-(quinolin-8-yl)-1,4-dihydroisoquinolin-3(2*H*)-ylidene)butanoate (**4h**)**

Following the general procedure I, 4-chloro-*N*-(quinolin-8-yl)benzamide (29 mg, 0.1 mmol), ethyl 2-ethylbuta-2,3-dienoate (42 mg, 0.3 mmol), Co(acac)<sub>2</sub> (5.4 mg, 0.02 mmol), Mn(OAc)<sub>2</sub> (35 mg, 0.2 mmol), KOTf (37 mg, 0.2 mmol), and TFE 2.0 ml were used. Resulting solution was purged with O<sub>2</sub> balloon for 0.5 min, then the reaction mixture was stirred at 40 °C for 13 h. After completion of the reaction, the reaction mixture was diluted with EtOAc and washed once with saturated aqueous NaHCO<sub>3</sub>. Then organic layer was dried over Na<sub>2</sub>SO<sub>4</sub> and concentrated on rotavapor under reduced pressure. Finally, the residue was purified by silica gel column chromatography

(Petroleum ether:Ethyl acetate = 4:1) to **4h** (28 mg) in 60% yield. <sup>1</sup>H-NMR (400 MHz, CDCl<sub>3</sub>) δ (ppm) 8.91-8.90 (m, 1H), 8.17 (d, *J* = 8.0 Hz, 1H), 8.02 (t, *J* = 8.4 Hz, 2H), 7.83 (d, *J* = 8.0 Hz, 1H), 7.64 (t, *J* = 7.6 Hz, 1H), 7.42-7.39 (m, 1H), 7.34 (d, *J* = 8.4 Hz, 1H), 7.31 (s, 1H), 4.85-4.81 (m, 1H), 4.48-4.44 (m, 1H), 4.20-4.15 (m, 2H), 2.13-2.02 (m, 2H), 1.26 (t, *J* = 7.2 Hz, 3H), -0.11 (t, *J* = 7.2 Hz, 3H); <sup>13</sup>C-NMR (100 MHz, CDCl<sub>3</sub>) δ (ppm) 169.0, 163.7, 150.3, 146.0, 143.6, 139.8, 138.82, 138.80, 136.2, 131.1, 130.4, 129.4, 127.8, 127.5, 127.2, 126.8, 126.0, 124.2, 121.6, 60.7, 35.1, 22.6, 14.3, 10.5; MS (ESI) calcd for C<sub>24</sub>H<sub>21</sub>ClN<sub>2</sub>O<sub>3</sub> [M+H]<sup>+</sup>: 420.12, found 421.04.

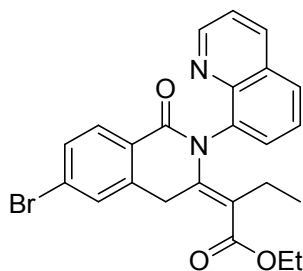

**Ethyl (*E*)-2-(6-bromo-1-oxo-2-(quinolin-8-yl)-1,4-dihydroisoquinolin-3(2*H*)-ylidene)butanoate (**4i**)**

Following the general procedure I, 4-bromo-*N*-(quinolin-8-yl)benzamide (32.6 mg, 0.1 mmol), ethyl 2-ethylbuta-2,3-dienoate (42 mg, 0.3 mmol), Co(acac)<sub>2</sub> (5.4 mg, 0.02 mmol), Mn(OAc)<sub>2</sub> (35 mg, 0.2 mmol), KOTf (39.8 mg, 0.2 mmol), and TFE 1.0 ml were used. Resulting solution was purged with O<sub>2</sub> balloon for 0.5 min, then the reaction mixture was stirred at 40 °C for 9.0 h. After completion of the reaction, the reaction mixture was diluted with EtOAc and washed once with saturated brine. Then organic layer was dried over Na<sub>2</sub>SO<sub>4</sub> and concentrated on rotavapor under reduced pressure. Finally, the residue was purified by silica gel column chromatography (Petroleum ether:Ethyl acetate = 4:1) to **4i** (41 mg) in 88% yield. <sup>1</sup>H-NMR (400 MHz, CDCl<sub>3</sub>) δ (ppm) 8.90 (dd, *J* = 8.0 Hz, *J* = 1.6 Hz, 1H), 8.16 (dd, *J* = 8.4 Hz, *J* = 1.6 Hz, 1H), 8.00 (d, *J* = 7.2 Hz, 1H), 7.95 (d, *J* = 8.0 Hz, 1H), 7.83 (d, *J* = 8.0 Hz, 1H), 7.64 (t, *J* = 7.6 Hz, 1H), 7.50 (t, *J* = 8.4 Hz, 1H), 7.48 (s, 1H), 7.40 (dd, *J* = 8.0 Hz, *J* = 4.0 Hz, 1H), 4.83 (d, *J* = 16.4 Hz, 1H), 4.45 (d, *J* = 16.4 Hz, 1H), 4.17 (dd, *J* = 14.0 Hz, *J* = 6.8 Hz, 2H), 2.20-1.90 (m, 2H), 1.25 (t, *J* = 7.2 Hz, 3H), -0.12 (t, *J* = 7.2 Hz, 3H). <sup>13</sup>C-NMR (100 MHz, CDCl<sub>3</sub>) δ (ppm) 168.9, 163.8, 150.3, 145.9, 143.5, 139.9, 138.7, 136.2, 131.0, 130.5, 130.4, 129.7, 129.3, 127.8, 127.6, 127.4, 125.9, 124.2, 121.6, 60.7, 35.0, 22.6, 14.3, 10.5; MS (ESI) calcd for C<sub>24</sub>H<sub>21</sub>BrN<sub>2</sub>O<sub>3</sub> [M+H]<sup>+</sup>: 465.07, found: 464.96.

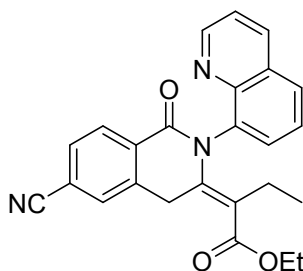

**Ethyl (*E*)-2-(6-cyano-1-oxo-2-(quinolin-8-yl)-1,4-dihydroisoquinolin-3(2*H*)-ylidene)**

**ne)butanoate (4j)**

Following the general procedure I, 4-cyano-*N*-(quinolin-8-yl)benzamide (27 mg, 0.1 mmol), ethyl 2-ethylbuta-2,3-dienoate (42 mg, 0.3 mmol), Co(acac)<sub>2</sub> (5.4 mg, 0.02 mmol), Mn(OAc)<sub>2</sub> (35 mg, 0.2 mmol), KOTf (39.8 mg, 0.2 mmol), and TFE 1.0 ml were used. Resulting solution was purged with O<sub>2</sub> balloon for 0.5 min, then the reaction mixture was stirred at 40 °C for 9.0 h. After completion of the reaction, the reaction mixture was diluted with EtOAc and washed once with saturated brine. Then organic layer was dried over Na<sub>2</sub>SO<sub>4</sub> and concentrated on rotavapor under reduced pressure. Finally, the residue was purified by silica gel column chromatography (Petroleum ether:Ethyl acetate = 4:1) to **4j** (26 mg) in 63% yield. <sup>1</sup>H-NMR (400 MHz, CDCl<sub>3</sub>) δ (ppm) 8.90 (m, 1H), 8.20-8.17 (m, 2H), 8.00 (d, *J* = 8.4 Hz, 1H), 7.85 (d, *J* = 8.4 Hz, 1H), 7.70-7.62 (m, 3H), 7.41 (q, *J* = 4.0 Hz, 1H), 4.88 (d, *J* = 15.6 Hz, 1H), 4.53 (d, *J* = 15.6 Hz, 1H), 4.16 (m, 2H), 2.11 (m, 1H), 2.01 (m, 1H), 1.26 (t, *J* = 7.2 Hz, 3H), -0.10 (t, *J* = 7.2 Hz, 3H). <sup>13</sup>C-NMR (100 MHz, CDCl<sub>3</sub>) δ (ppm) 168.7, 163.0, 150.4, 144.8, 143.3, 139.1, 138.4, 136.3, 132.5, 130.8, 130.7, 130.4, 129.5, 129.4, 128.0, 125.9, 125.0, 121.7, 118.2, 115.9, 60.9, 34.8, 22.6, 14.3, 10.4. MS (ESI) calcd for C<sub>25</sub>H<sub>21</sub>N<sub>3</sub>O<sub>3</sub> [M+H]<sup>+</sup>: 412.16, found: 412.46.

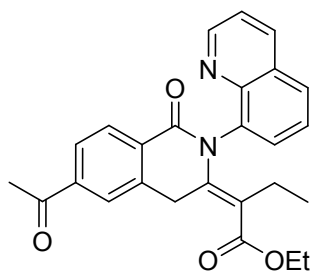**Ethyl (E)-2-(6-acetyl-1-oxo-2-(quinolin-8-yl)-1,4-dihydroisoquinolin-3(2H)-ylidene)butanoate (4k)**

Following the general procedure I, 4-acetyl-*N*-(quinolin-8-yl)benzamide (29 mg, 0.1 mmol), ethyl 2-ethylbuta-2,3-dienoate (42 mg, 0.3 mmol), Co(acac)<sub>2</sub> (5.4 mg, 0.02 mmol), Mn(OAc)<sub>2</sub> (35 mg, 0.2 mmol), KOTf (37 mg, 0.2 mmol), and TFE 2.0 ml were used. Resulting solution was purged with O<sub>2</sub> balloon for 0.5 min, then the reaction mixture was stirred at 40 °C for 13 h. After completion of the reaction, the reaction mixture was diluted with EtOAc and washed once with saturated aqueous NaHCO<sub>3</sub>. Then organic layer was dried over Na<sub>2</sub>SO<sub>4</sub> and concentrated on rotavapor under reduced pressure. Finally, the residue was purified by silica gel column chromatography (Petroleum ether:Ethyl acetate = 4:1) to **4k** (27 mg) in 63% yield. <sup>1</sup>H-NMR (400 MHz, CDCl<sub>3</sub>) δ (ppm) 8.92-8.91 (m, 1H), 8.18 (d, *J* = 7.2 Hz, 2H), 8.01 (d, *J* = 7.2 Hz, 1H), 7.93 (d, *J* = 8.4 Hz, 1H), 7.89 (s, 1H), 7.85 (d, *J* = 8.0 Hz, 1H), 7.65 (d, *J* = 8.0 Hz, 1H), 7.43-7.40 (m, 1H), 4.90-4.86 (m, 1H), 4.55-4.51 (m, 1H), 4.22-4.16 (m, 2H), 2.66 (s, 3H), 2.13-2.04 (m, 2H), 1.26 (t, *J* = 7.2 Hz, 3H), -0.11 (t, *J* = 7.2 Hz, 3H); <sup>13</sup>C-NMR (100 MHz, CDCl<sub>3</sub>) δ (ppm) 197.8, 169.0, 163.7, 150.4, 145.8, 143.5, 140.0, 138.8, 138.5, 136.2, 132.5, 130.9, 129.4, 129.2, 127.9, 126.9, 126.6, 126.0, 124.4, 121.7, 60.8, 35.3, 27.1, 22.6, 14.3, 10.5; MS (ESI) calcd for C<sub>26</sub>H<sub>24</sub>N<sub>2</sub>O<sub>4</sub> [M+H]<sup>+</sup>: 428.17, found 429.08.

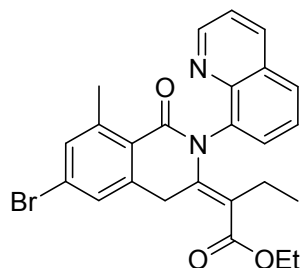

**Ethyl (E)-2-(6-bromo-8-methyl-1-oxo-2-(quinolin-8-yl)-1,4-dihydroisoquinolin-3(2H)-ylidene)butanoate (4l)**

Following the general procedure I, 4-bromo-2-methyl-*N*-(quinolin-8-yl)benzamide (34 mg, 0.1 mmol), ethyl 2-ethylbuta-2,3-dienoate (42 mg, 0.3 mmol), Co(acac)<sub>2</sub> (5.4 mg, 0.02 mmol), Mn(OAc)<sub>2</sub> (35 mg, 0.2 mmol), KOTf (37 mg, 0.2 mmol), and TFE 2.0 ml were used. Resulting solution was purged with O<sub>2</sub> balloon for 0.5 min, then the reaction mixture was stirred at 40 °C for 12 h. After completion of the reaction, the reaction mixture was diluted with EtOAc and washed once with saturated aqueous NaHCO<sub>3</sub>. Then organic layer was dried over Na<sub>2</sub>SO<sub>4</sub> and concentrated on rotavapor under reduced pressure. Finally, the residue was purified by silica gel column chromatography (Petroleum ether:Ethyl acetate = 4:1) to **4l** (30 mg) in 64% yield. <sup>1</sup>H-NMR (400 MHz, CDCl<sub>3</sub>) δ (ppm) 8.91-8.90 (m, 1H), 8.17 (d, *J* = 8.4 Hz, *J* = 1.2 Hz, 1H), 7.90 (d, *J* = 7.2 Hz, *J* = 0.8 Hz, 1H), 7.83 (d, *J* = 8.0 Hz, 1H), 7.63 (t, *J* = 7.6 Hz, 1H), 7.42-7.39 (m, 1H), 7.32 (d, *J* = 9.6 Hz, 2H), 4.83-4.79 (m, 1H), 4.40-4.36 (m, 1H), 4.18 (q, *J* = 7.2 Hz, 2H), 2.66 (s, 3H), 2.16-2.09 (m, 1H), 2.05-1.98 (m, 1H), 1.26 (t, *J* = 7.2 Hz, 3H), -0.12 (t, *J* = 7.6 Hz, 3H); <sup>13</sup>C-NMR (100 MHz, CDCl<sub>3</sub>) δ (ppm) 168.9, 164.5, 150.4, 146.2, 143.8, 143.1, 140.2, 139.4, 136.3, 133.4, 130.9, 129.4, 127.9, 127.5, 126.2, 126.1, 123.2, 121.7, 60.7, 36.0, 22.6, 21.6, 14.3, 10.5; MS (ESI) calcd for C<sub>25</sub>H<sub>23</sub>BrN<sub>2</sub>O<sub>3</sub> [M+H]<sup>+</sup>: 478.09, found 478.95.

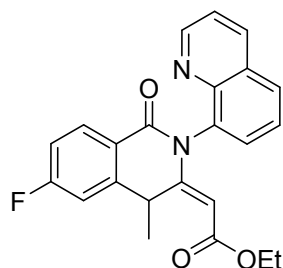

**Ethyl (E)-2-(6-fluoro-4-methyl-1-oxo-2-(quinolin-8-yl)-1,4-dihydroisoquinolin-3(2H)-ylidene)acetate (4m)**

Following the general procedure I, 4-flouro-*N*-(quinolin-8-yl)benzamide (34 mg, 0.1 mmol), ethyl penta-2,3-dienoate (38 mg, 0.3 mmol), Co(acac)<sub>2</sub> (5.4 mg, 0.02 mmol), Mn(OAc)<sub>2</sub> (35 mg, 0.2 mmol), KOTf (37 mg, 0.2 mmol), and TFE 2.0 ml were used. Resulting solution was purged with O<sub>2</sub> balloon for 0.5 min, then the reaction mixture was stirred at 40 °C for 11 h. After completion of the reaction, the reaction mixture was diluted with EtOAc and washed once with saturated aqueous NaHCO<sub>3</sub>. Then organic layer was dried over Na<sub>2</sub>SO<sub>4</sub> and concentrated on rotavapor under reduced pressure. Finally, the residue was purified by silica gel column chromatography (Petroleum

ether:Ethyl acetate = 4:1) to **4m** (28 mg) (including two fraction 1F and 2F) in 72% yield. **4m-1F** <sup>1</sup>H-NMR (400 MHz, CDCl<sub>3</sub>) δ (ppm) 8.87 (dd, *J* = 4.0 Hz, *J* = 1.2 Hz, 1H), 8.25 (dd, *J* = 8.4 Hz, *J* = 1.6 Hz, 1H), 8.16-8.12 (m, 1H), 7.96 (d, *J* = 7.8 Hz, 1H), 7.70-7.66 (m, 1H), 7.61 (d, *J* = 6.8 Hz, 1H), 7.46 (dd, *J* = 8.4 Hz, *J* = 4.4 Hz, 1H), 7.10-7.06 (m, 2H), 5.53-5.47 (m, 1H), 4.61 (s, 1H), 4.10-3.99 (m, 2H), 1.91 (d, *J* = 7.2 Hz, 3H), 1.15-1.12 (m, 3H). **4m-2F** <sup>1</sup>H-NMR (400 MHz, CDCl<sub>3</sub>) δ (ppm) 8.83 (dd, *J* = 4.0 Hz, *J* = 1.2 Hz, 0.6H), 8.21 (dd, *J* = 4.0 Hz, *J* = 1.2 Hz, 0.6H), 8.16-8.12 (m, 0.6H), 7.95 (d, *J* = 9.6 Hz, 0.6H), 7.70-7.66 (m, 1.2H), 7.43 (dd, *J* = 8.4 Hz, *J* = 4.4 Hz, 0.6H), 7.10-7.06 (m, 1.2H), 5.53-5.47 (m, 0.6H), 4.81 (s, 0.6H), 4.10-3.99 (m, 1.2H), 1.91 (d, *J* = 7.2 Hz, 1.8H), 1.15-1.12 (m, 1.8H); MS (ESI) calcd for C<sub>23</sub>H<sub>19</sub>FN<sub>2</sub>O<sub>3</sub> [M+H]<sup>+</sup>: 391.14, found 391.07.

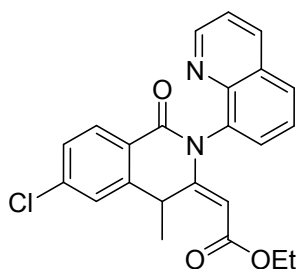

**Ethyl (*E*)-2-(6-chloro-4-methyl-1-oxo-2-(quinolin-8-yl)-1,4-dihydroisoquinolin-3(2H)-ylidene)acetate (**4n**)**

Following the general procedure I, 4-chloro-*N*-(quinolin-8-yl)benzamide (28.2 mg, 0.1 mmol), ethyl penta-2,3-dienoate (38 mg, 0.3 mmol), Co(acac)<sub>2</sub> (5.4 mg, 0.02 mmol), Mn(OAc)<sub>2</sub> (35 mg, 0.2 mmol), KOTf (37 mg, 0.2 mmol), and TFE 2.0 ml were used. Resulting solution was purged with O<sub>2</sub> balloon for 0.5 min, then the reaction mixture was stirred at 40 °C for 12 h. After completion of the reaction, the reaction mixture was diluted with EtOAc and washed once with saturated aqueous NaHCO<sub>3</sub>. Then organic layer was dried over Na<sub>2</sub>SO<sub>4</sub> and concentrated on rotavapor under reduced pressure. Finally, the residue was purified by silica gel column chromatography (Petroleum ether:Ethyl acetate = 4:1) to **4n** (28.8 mg) (including two fraction 1F and 2F) in 71% yield. **4n-1F** <sup>1</sup>H-NMR (400 MHz, CDCl<sub>3</sub>) δ (ppm) 8.85 (d, *J* = 4.0 Hz, 1H), 8.23 (d, *J* = 8.0 Hz, 1H), 8.05 (d, *J* = 8.4 Hz, 1H), 7.96-7.93 (m, 1H), 7.69-7.65 (m, 1H), 7.60 (d, *J* = 7.2 Hz, 1H), 7.46-7.35 (m, 3H), 5.51-5.44 (m, 1H), 4.60 (s, 1H), 4.09-3.97 (m, 2H), 1.74 (d, *J* = 7.2 Hz, 3H), 1.14-1.10 (m, 3H); <sup>13</sup>C-NMR (100 MHz, CDCl<sub>3</sub>) δ (ppm) 166.57, 162.4, 161.1, 151.6, 144.5, 144.4, 139.8, 136.6, 136.2, 129.6, 129.3, 127.8, 127.11, 127.0, 126.2, 124.4, 122.2, 101.2, 59.9, 35.0, 26.7, 14.3. **4n-2F** <sup>1</sup>H-NMR (400 MHz, CDCl<sub>3</sub>) δ (ppm) 8.82 (d, *J* = 4.0 Hz, 0.7H), 8.20 (d, *J* = 8.0 Hz, 0.7H), 8.05 (d, *J* = 8.4 Hz, 0.7H), 7.96-7.93 (m, 0.7H), 7.69-7.65 (m, 1.4H), 7.46-7.35 (m, 2.1H), 5.51-5.44 (m, 0.7H), 4.81 (s, 0.7H), 4.09-3.97 (m, 1.4H), 1.90 (d, *J* = 7.2 Hz, 2.1H), 1.14-1.10 (m, 2.1H); <sup>13</sup>C-NMR (100 MHz, CDCl<sub>3</sub>) δ (ppm) 166.64, 162.4, 160.7, 151.1, 144.8, 143.8, 139.7, 136.9, 135.2, 129.53, 129.45, 127.7, 127.09, 127.0, 126.2, 124.5, 122.1, 100.5, 59.8, 35.3, 27.2, 14.3; MS (ESI) calcd for C<sub>23</sub>H<sub>19</sub>ClN<sub>2</sub>O<sub>3</sub> [M+H]<sup>+</sup>: 407.11, found 407.15.

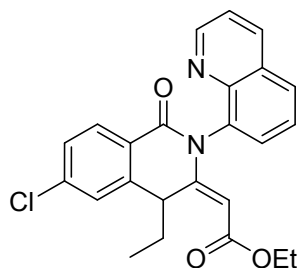

**Ethyl (E)-2-(6-chloro-4-ethyl-1-oxo-2-(quinolin-8-yl)-1,4-dihydroisoquinolin-3(2H)-ylidene)acetate (4o)**

Following the general procedure I, 4-chloro-*N*-(quinolin-8-yl)benzamide (28 mg, 0.1 mmol), ethyl hexa-2,3-dienoate (42 mg, 0.3 mmol), Co(acac)<sub>2</sub> (5.4 mg, 0.02 mmol), Mn(OAc)<sub>2</sub> (35 mg, 0.2 mmol), KOTf (37 mg, 0.2 mmol), and TFE 1.5 ml were used. Resulting solution was purged with O<sub>2</sub> balloon for 0.5 min, then the reaction mixture was stirred at 40 °C for 8.5 h. After completion of the reaction, the reaction mixture was diluted with EtOAc and washed once with saturated aqueous NaHCO<sub>3</sub>. Then organic layer was dried over Na<sub>2</sub>SO<sub>4</sub> and concentrated on rotavapor under reduced pressure. Finally, the residue was purified by silica gel column chromatography (Petroleum ether:Ethyl acetate = 4:1) to **4o** (30 mg) (including two fraction 1F and 2F) in 74% yield. **4o-1F** <sup>1</sup>H-NMR (400 MHz, CDCl<sub>3</sub>) δ (ppm) 8.85 (br, 1H), 8.22 (t, *J* = 8.0 Hz, 1H), 8.07 (d, *J* = 8.4 Hz, 1H), 7.95 (d, *J* = 8.0 Hz, 1H), 7.70-7.61 (m, 2H), 7.45-7.38 (m, 3H), 5.46-5.43 (m, 1H), 4.67 (s, 1H), 4.13-3.95 (m, 2H), 2.15-2.05 (m, 2H), 1.17-1.01 (m, 6H); <sup>13</sup>C-NMR (100 MHz, CDCl<sub>3</sub>) δ (ppm) 166.7, 162.8, 160.1, 151.6, 144.3, 142.6, 139.3, 136.5, 136.2, 131.0, 130.4, 129.6, 129.3, 127.7, 127.0, 126.3, 125.3, 122.2, 101.9, 59.84, 40.7, 33.7, 14.3, 11.0. **4o-2F** <sup>1</sup>H-NMR (400 MHz, CDCl<sub>3</sub>) δ (ppm) 8.85 (br, 0.6H), 8.22 (t, *J* = 8.0 Hz, 0.6H), 8.07 (d, *J* = 8.4 Hz, 0.6H), 7.95 (d, *J* = 8.0 Hz, 0.6H), 7.70-7.61 (m, 1.2H), 7.45-7.38 (m, 1.8H), 5.41-5.38 (m, 0.6H), 4.86 (s, 0.6H), 4.13-3.95 (m, 1.2H), 2.39-2.34 (m, 0.6H), 2.28-2.22 (m, 0.6H), 1.17-1.01 (m, 3.6H); <sup>13</sup>C-NMR (100 MHz, CDCl<sub>3</sub>) δ (ppm) 166.8, 162.7, 159.7, 151.0, 143.9, 143.0, 139.1, 137.0, 135.2, 130.3, 130.0, 129.4, 129.3, 127.8, 127.0, 126.3, 125.4, 122.0, 101.4, 59.80, 41.4, 34.3, 14.3, 11.4; MS (ESI) calcd for C<sub>24</sub>H<sub>21</sub>ClN<sub>2</sub>O<sub>3</sub> [M+H]<sup>+</sup>: 420.13, found 421.04.

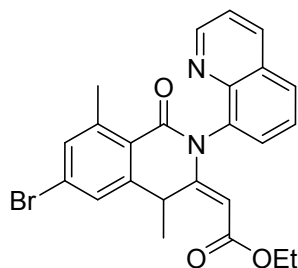

**Ethyl (E)-2-(6-bromo-4,8-dimethyl-1-oxo-2-(quinolin-8-yl)-1,4-dihydroisoquinolin-3(2H)-ylidene)acetate (4p)**

Following the general procedure I, 4-bromo-2-methyl-*N*-(quinolin-8-yl)benzamide (34 mg, 0.1 mmol), ethyl penta-2,3-dienoate (38 mg, 0.3 mmol), Co(acac)<sub>2</sub> (5.4 mg, 0.02 mmol), Mn(OAc)<sub>2</sub> (35 mg, 0.2 mmol), KOTf (37 mg, 0.2 mmol), and TFE 2.0 ml were

used. Resulting solution was purged with O<sub>2</sub> balloon for 0.5 min, then the reaction mixture was stirred at 40 °C for 10 h. After completion of the reaction, the reaction mixture was diluted with EtOAc and washed once with saturated aqueous NaHCO<sub>3</sub>. Then organic layer was dried over Na<sub>2</sub>SO<sub>4</sub> and concentrated on rotavapor under reduced pressure. Finally, the residue was purified by silica gel column chromatography (Petroleum ether:Ethyl acetate = 4:1) to **4p** (25 mg) (including two fraction 1F and 2F) in 55% yield. **4p-1F** <sup>1</sup>H-NMR (400 MHz, CDCl<sub>3</sub>) δ (ppm) 8.85 (d, *J* = 4.0 Hz, 1H), 8.25 (d, *J* = 1.6 Hz, 1H), 7.94 (d, *J* = 8.0 Hz, 1H), 7.68-7.63 (m, 2H), 7.46-7.41 (m, 2H), 7.36 (s, 1H), 5.47-5.41 (m, 1H), 4.58 (s, 1H), 4.09-3.96 (m, 2H), 2.59 (s, 3H), 1.75 (d, *J* = 7.2 Hz, 3H), 1.16-1.12 (m, 3H); <sup>13</sup>C-NMR (100 MHz, CDCl<sub>3</sub>) δ (ppm) 166.79, 163.5, 161.1, 151.4, 145.3, 144.2, 144.0, 136.6, 136.2, 133.8, 130.7, 129.6, 129.3, 128.2, 127.06, 126.98, 126.3, 123.5, 122.2, 100.0, 59.8, 36.0, 27.2, 22.7, 14.3. **4p-2F** <sup>1</sup>H-NMR (400 MHz, CDCl<sub>3</sub>) δ (ppm) 8.85 (d, *J* = 4.0 Hz, 0.8H), 8.23 (dd, *J* = 1.6 Hz, 0.8H), 7.94 (d, *J* = 8.0 Hz, 0.8H), 7.68-7.63 (m, 1.6H), 7.36 (s, 1H), 5.47-5.41 (m, 0.8H), 4.74 (s, 0.8H), 4.09-3.96 (m, 1.6H), 2.59 (s, 2.4H), 1.92 (d, *J* = 7.2 Hz, 2.4H), 1.16-1.12 (m, 2.4H); <sup>13</sup>C-NMR (100 MHz, CDCl<sub>3</sub>) δ (ppm) 166.75, 163.2, 160.7, 151.1, 145.9, 144.3, 143.9, 137.5, 135.8, 133.7, 130.7, 129.9, 129.4, 128.3, 127.06, 126.98, 126.3, 123.2, 122.0, 99.2, 59.7, 35.6, 26.3, 22.5, 14.3; MS (ESI) calcd for C<sub>24</sub>H<sub>21</sub>BrNO<sub>3</sub> [M+H]<sup>+</sup>: 464.07, found 464.96.

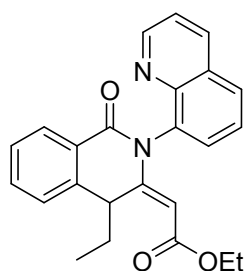

**Ethyl (*E*)-2-(4-ethyl-1-oxo-2-(quinolin-8-yl)-1,4-dihydroisoquinolin-3(2*H*)-ylidene)acetate (**4q**)**

Following the general procedure I, *N*-(quinolin-8-yl)benzamide (24.8 mg, 0.1 mmol), ethyl hexa-2,3-dienoate (42 mg, 0.3 mmol), Co(acac)<sub>2</sub> (5.4 mg, 0.02 mmol), Mn(OAc)<sub>2</sub> (35 mg, 0.2 mmol), KOTf (37 mg, 0.2 mmol), and TFE 1.5 ml were used. Resulting solution was purged with O<sub>2</sub> balloon for 0.5 min, then the reaction mixture was stirred at 40 °C for 8.5 h. After completion of the reaction, the reaction mixture was diluted with EtOAc and washed once with saturated aqueous NaHCO<sub>3</sub>. Then organic layer was dried over Na<sub>2</sub>SO<sub>4</sub> and concentrated on rotavapor under reduced pressure. Finally, the residue was purified by silica gel column chromatography (Petroleum ether:Ethyl acetate = 4:1) to **4q** (26 mg) (including two fraction 1F and 2F) in 67% yield. **4q-1F** <sup>1</sup>H-NMR (400 MHz, CDCl<sub>3</sub>) δ (ppm) 8.86-8.84 (m, 1H), 8.23 (d, *J* = 8.4 Hz, 1H), 8.13 (d, *J* = 8.0 Hz, 1H), 7.96-7.94 (m, 1H), 7.70-7.62 (m, 2H), 7.58 (t, *J* = 8.0 Hz, 1H), 7.45-7.36 (m, 3H), 5.47-5.39 (m, 1H), 4.67 (s, 1H), 4.15-3.97 (m, 2H), 2.15-2.08 (m, 2H), 1.16-1.06 (m, 6H); <sup>13</sup>C-NMR (100 MHz, CDCl<sub>3</sub>) δ (ppm) 166.9, 163.6, 161.2, 151.6, 144.5, 140.9, 136.5, 136.2, 133.0, 131.0, 129.5, 129.4, 128.8, 127.8, 127.4, 127.1, 126.3, 122.2, 101.4, 59.8, 41.6, 34.5, 14.4, 11.4. **4q-2F** <sup>1</sup>H-NMR (400 MHz, CDCl<sub>3</sub>) δ (ppm) 8.86-8.84 (m, 0.55H), 8.21 (d, *J* = 8.0 Hz, 0.55H), 8.13 (d, *J* = 8.0 Hz,

0.55H), 7.96-7.94 (m, 0.55H), 7.70-7.62 (m, 1.1H), 7.58 (t,  $J = 8.0$  Hz, 0.55H), 7.45-7.36 (m, 1.65H), 5.47-5.39 (m, 0.55H), 4.84 (s, 0.55H), 4.15-3.97 (m, 1.1H), 2.35-2.23 (m, 1.1H), 1.16-1.06 (m, 3.3H);  $^{13}\text{C}$ -NMR (100 MHz,  $\text{CDCl}_3$ )  $\delta$  (ppm) 167.0, 163.6, 160.7, 151.0, 144.1, 141.3, 137.3, 135.7, 132.9, 131.0, 129.6, 129.3, 128.6, 127.8, 127.2, 126.7, 126.3, 122.0, 100.8, 59.7, 41.0, 33.8, 14.3, 11.1; MS (ESI) calcd for  $\text{C}_{24}\text{H}_{22}\text{N}_2\text{O}_3$   $[\text{M}+\text{H}]^+$ : 387.16, found 387.11.

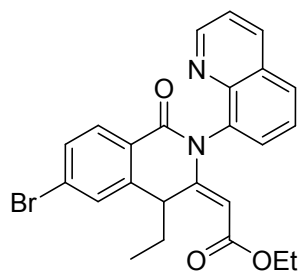

**Ethyl (E)-2-(6-bromo-4-ethyl-1-oxo-2-(quinolin-8-yl)-1,4-dihydroisoquinolin-3(2H)-ylidene)acetate (4r)**

Following the general procedure I, 4-bromo-N-(quinolin-8-yl)benzamide (33 mg, 0.1 mmol), ethyl hexa-2,3-dienoate (42 mg, 0.3 mmol),  $\text{Co}(\text{acac})_2$  (5.4 mg, 0.02 mmol),  $\text{Mn}(\text{OAc})_2$  (35 mg, 0.2 mmol), KOTf (37 mg, 0.2 mmol), and TFE 1.5 ml were used. Resulting solution was purged with  $\text{O}_2$  balloon for 0.5 min, then the reaction mixture was stirred at 40 °C for 9 h. After completion of the reaction, the reaction mixture was diluted with EtOAc and washed once with saturated aqueous  $\text{NaHCO}_3$ . Then organic layer was dried over  $\text{Na}_2\text{SO}_4$  and concentrated on rotavapor under reduced pressure. Finally, the residue was purified by silica gel column chromatography (Petroleum ether:Ethyl acetate = 4:1) to **4r** (28 mg) (including two fraction 1F and 2F) in 60% yield. **4r-1F**  $^1\text{H}$ -NMR (400 MHz,  $\text{CDCl}_3$ )  $\delta$  (ppm) 8.84 (s, 1H), 8.23 (t,  $J = 9.0$  Hz, 1H), 7.99-7.94 (m, 2H), 7.70-7.61 (m, 2H), 7.55 (d,  $J = 5.4$  Hz, 2H), 7.45-7.43 (m, 1H), 5.45-5.41 (m, 1H), 4.66 (s, 1H), 4.09-3.95 (m, 2H), 2.14-2.07 (m, 2H), 1.16-1.07 (m, 6H);  $^{13}\text{C}$ -NMR (100 MHz,  $\text{CDCl}_3$ )  $\delta$  (ppm) 166.7, 162.9, 160.0, 151.6, 144.3, 142.7, 136.5, 136.2, 130.7, 130.6, 130.3, 129.6, 129.5, 129.2, 127.9, 126.3, 125.68, 122.2, 101.9, 59.82, 40.6, 33.7, 14.3, 10.9. **4r-2F**  $^1\text{H}$ -NMR (400 MHz,  $\text{CDCl}_3$ )  $\delta$  (ppm) 8.84 (s, 0.55H), 8.23 (t,  $J = 9.0$  Hz, 0.55H), 7.99-7.94 (m, 1.1H), 7.70-7.61 (m, 1.1H), 7.55 (d,  $J = 5.4$  Hz, 1.1H), 7.45-7.43 (m, 0.55H), 5.40-5.36 (m, 0.55H), 4.86 (s, 0.55H), 4.09-3.95 (m, 1.1H), 2.38-2.20 (m, 1.1H), 1.16-1.07 (m, 3.3H);  $^{13}\text{C}$ -NMR (100 MHz,  $\text{CDCl}_3$ )  $\delta$  (ppm) 166.8, 162.9, 159.6, 151.0, 143.8, 143.1, 136.9, 135.2, 130.9, 130.5, 129.9, 129.4, 129.2, 127.8, 126.3, 125.72, 122.0, 101.4, 59.78, 41.2, 34.3, 14.3, 11.3; MS (ESI) calcd for  $\text{C}_{24}\text{H}_{21}\text{BrN}_2\text{O}_3$   $[\text{M}+\text{H}]^+$ : 465.07, found: 465.01.

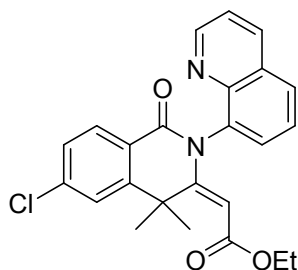

**Ethyl (E)-2-(6-chloro-4,4-dimethyl-1-oxo-2-(quinolin-8-yl)-1,4-dihydroisoquinolin-3(2H)-ylidene)propanoate (4s)**

Following the general procedure I, 4-chloro-*N*-(quinolin-8-yl)benzamide (27.3 mg, 0.1 mmol), ethyl 4-methylpenta-2,3-dienoate (42 mg, 0.3 mmol), Co(acac)<sub>2</sub> (5.4 mg, 0.02 mmol), Mn(OAc)<sub>2</sub> (35 mg, 0.2 mmol), KOTf (39.8 mg, 0.2 mmol), and TFE 1.0 ml were used. Resulting solution was purged with O<sub>2</sub> balloon for 0.5 min, then the reaction mixture was stirred at 40 °C for 9.5 h. After completion of the reaction, the reaction mixture was diluted with EtOAc and washed once with saturated brine. Then organic layer was dried over Na<sub>2</sub>SO<sub>4</sub> and concentrated on rotavapor under reduced pressure. Finally, the residue was purified by silica gel column chromatography (Petroleum ether:Ethyl acetate = 1:1) to **4s** (29 mg) in 67% yield. <sup>1</sup>H-NMR (400 MHz, CDCl<sub>3</sub>) δ (ppm) 8.91 (dd, *J* = 1.6 Hz, *J* = 4.0 Hz, 1H), 8.24 (d, *J* = 8.0 Hz, 1H), 8.17 (d, *J* = 8.0 Hz, 1H), 7.83 (d, *J* = 2.0 Hz, 1H), 7.75-7.71 (m, 3H), 7.60 (t, *J* = 8.0 Hz, 1H), 7.43 (q, *J* = 4.0 Hz, 1H), 5.48 (s, 1H), 3.23 (m, 1H), 2.98 (m, 1H), 1.87 (s, 3H), 1.78 (s, 3H), 0.70 (t, *J* = 7.2 Hz, 1H). <sup>13</sup>C-NMR (100 MHz, CDCl<sub>3</sub>) δ (ppm) 165.5, 162.5, 153.6, 150.0, 146.7, 144.2, 139.2, 137.4, 136.1, 131.0, 130.1, 129.0, 128.3, 127.6, 126.7, 125.8, 123.0, 121.5, 103.8, 60.0, 41.2 (2C), 13.7; MS (ESI) calcd for C<sub>24</sub>H<sub>21</sub>ClN<sub>2</sub>O<sub>3</sub> [M+H]<sup>+</sup>: 421.12, found: 421.04.

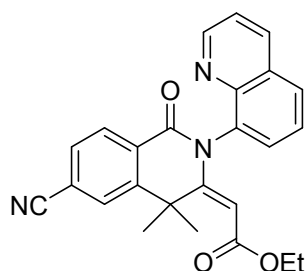

**Ethyl (E)-2-(6-cyano-4,4-dimethyl-1-oxo-2-(quinolin-8-yl)-1,4-dihydroisoquinolin-3(2H)-ylidene)propanoate (4t)**

Following the general procedure I, 4-cyano-*N*-(quinolin-8-yl)benzamide (27.3 mg, 0.1 mmol), ethyl 4-methylpenta-2,3-dienoate (42 mg, 0.3 mmol), Co(acac)<sub>2</sub> (5.4 mg, 0.02 mmol), Mn(OAc)<sub>2</sub> (35 mg, 0.2 mmol), KOTf (39.8 mg, 0.2 mmol), and TFE 1.0 ml were used. Resulting solution was purged with O<sub>2</sub> balloon for 0.5 min, then the reaction mixture was stirred at 40 °C for 9.0 h. After completion of the reaction, the reaction mixture was diluted with EtOAc and washed once with saturated brine. Then organic layer was dried over Na<sub>2</sub>SO<sub>4</sub> and concentrated on rotavapor under reduced pressure. Finally, the residue was purified by silica gel column chromatography (Petroleum ether:Ethyl acetate = 1:1) to **4t** (30 mg) in 71% yield. <sup>1</sup>H-NMR (400 MHz, CDCl<sub>3</sub>) δ

(ppm) 8.91 (dd,  $J = 1.6$  Hz,  $J = 4.0$  Hz, 1H), 8.23 (dd,  $J = 7.6$  Hz, 1H), 8.19 (dd,  $J = 1.6$  Hz,  $J = 7.6$  Hz, 1H), 7.85 (dd,  $J = 2.0$  Hz,  $J = 8.0$  Hz, 1H), 7.74-7.70 (m, 3H), 7.59 (t,  $J = 8.0$  Hz, 1H), 7.43 (q,  $J = 4.0$  Hz, 1H), 5.48 (s, 1H), 3.23 (m, 1H), 2.98 (m, 1H), 1.87 (s, 3H), 1.78 (s, 3H), 0.70 (t,  $J = 7.2$  Hz, 1H).  $^{13}\text{C}$ -NMR (100 MHz,  $\text{CDCl}_3$ )  $\delta$  (ppm) 165.3, 161.7, 152.6, 150.1, 145.9, 137.0, 136.2, 132.0, 131.0, 130.1, 129.9, 129.1, 128.6, 126.6, 125.8, 121.7, 116.3, 104.7, 60.2, 41.2, 13.7; MS (ESI) calcd for  $\text{C}_{25}\text{H}_{21}\text{N}_3\text{O}_3$   $[\text{M}+\text{H}]^+$ : 412.16, found: 412.12.

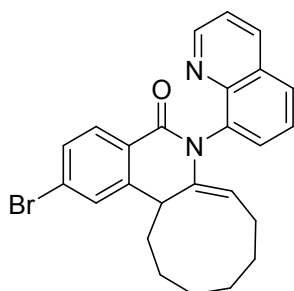

**(*E*)-2-bromo-6-(quinolin-8-yl)-6,8,9,10,11,12,13,13a-octahydro-5H-cyclonona[c]isoquinolin-5-one (4u)**

Following the general procedure I, 4-bromo-*N*-(quinolin-8-yl)benzamide (32.6 mg, 0.1 mmol), cyclonona-1,2-diene (36.6 mg, 0.3 mmol),  $\text{Co}(\text{acac})_2$  (5.4 mg, 0.02 mmol),  $\text{Mn}(\text{OAc})_2$  (35 mg, 0.2 mmol), KOTf (39.8 mg, 0.2 mmol), and TFE 1.0 ml were used. Resulting solution was purged with  $\text{O}_2$  balloon for 0.5 min, then the reaction mixture was stirred at 80 °C for 10.0 h. After completion of the reaction, the reaction mixture was diluted with EtOAc and washed once with saturated brine. Then organic layer was dried over  $\text{Na}_2\text{SO}_4$  and concentrated on rotavapor under reduced pressure. Finally, the residue was purified by silica gel column chromatography (Petroleum ether:Ethyl acetate = 6:1) to **4u** (15.4 mg) in 34% yield.  $^1\text{H}$ -NMR (400 MHz,  $\text{CDCl}_3$ )  $\delta$  (ppm) 8.91 (dd,  $J = 1.2$  Hz,  $J = 4.0$  Hz, 1H), 8.21 (dd,  $J = 1.2$  Hz,  $J = 8.0$  Hz, 1H), 8.04 (d,  $J = 8.4$  Hz, 1H), 7.87-7.82 (m, 1H), 7.88 (d,  $J = 1.6$  Hz, 3H), 7.77 (s, 1H), 7.64-7.61 (m, 1H), 7.51 (dd,  $J = 1.6$  Hz,  $J = 8.4$  Hz, 1H), 7.42 (q,  $J = 4.0$  Hz, 1H), 6.48 (t,  $J = 8.4$  Hz, 1H), 5.32 (m, 2H), 2.54 (m, 1H), 2.34-2.18 (m, 2H), 2.06-1.12 (m, 20H).  $^{13}\text{C}$ -NMR (100 MHz,  $\text{CDCl}_3$ )  $\delta$  (ppm) 162.6, 150.6, 138.5, 136.7, 131.3, 131.1, 130.9, 130.6, 129.9, 128.1, 127.1, 126.8, 126.5, 126.3, 121.5, 33.0, 27.8, 26.7, 25.6, 22.6. MS (ESI) calcd for  $\text{C}_{25}\text{H}_{23}\text{BrN}_2\text{O}$   $[\text{M}+\text{H}]^+$ : 447.10, found: 447.02.

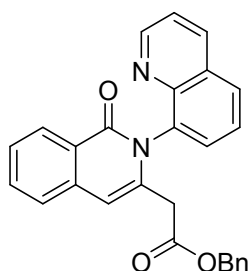

**Benzyl 2-(1-oxo-2-(quinolin-8-yl)-1,2-dihydroisoquinolin-3-yl)acetate (5a)**

Following the general procedure II, *N*-(quinolin-8-yl)benzamide (24.8 mg, 0.1 mmol),

benzyl buta-2,3-dienoate (53 mg, 0.3 mmol), Co(acac)<sub>2</sub> (5.4 mg, 0.02 mmol), Mn(OAc)<sub>2</sub> (35 mg, 0.2 mmol), KOAc (39.8 mg, 0.2 mmol), and TFE 1.0 ml were used. Resulting solution was purged with O<sub>2</sub> balloon for 0.5 min, then the reaction mixture was stirred at 80 °C for 3.5 h. After completion of the reaction, the reaction mixture was diluted with EtOAc and washed once with saturated brine. Then organic layer was dried over Na<sub>2</sub>SO<sub>4</sub> and concentrated on rotavapor under reduced pressure. Finally, the residue was purified by silica gel column chromatography (Petroleum ether:Ethyl acetate = 1:1) to **5a** (25 mg) in 59% yield. <sup>1</sup>H-NMR (400 MHz, CDCl<sub>3</sub>) δ (ppm) 8.85 (dd, *J* = 1.6 Hz, *J* = 4.0 Hz, 1H), 8.39 (d, *J* = 7.6 Hz, 2H), 8.22 (dd, *J* = 1.6 Hz, *J* = 8.4 Hz, 1H), 7.90 (dd, *J* = 1.2 Hz, *J* = 8.0 Hz, 1H), 7.66 (m, 1H), 7.60 (dd, *J* = 1.2 Hz, *J* = 7.2 Hz, 1H), 7.55 (d, *J* = 7.6 Hz, 1H), 7.48 (m, 1H), 7.49-7.47 (m, 3H), 7.17 (dd, *J* = 2.0 Hz, *J* = 6.0 Hz, 2H), 6.63 (s, 1H), 4.90 (d, *J* = 16.4 Hz, 1H), 4.89 (d, *J* = 16.4 Hz, 1H), 3.41 (d, *J* = 17.2 Hz, 1H), 3.12 (d, *J* = 17.2 Hz, 1H). <sup>13</sup>C-NMR (100 MHz, CDCl<sub>3</sub>) δ (ppm) 169.2, 163.5, 151.4, 144.3, 137.0, 136.3, 135.5, 135.0, 132.5, 131.2, 129.5, 129.3, 128.48, 128.47, 128.4, 128.2, 126.7, 126.2, 125.9, 125.5, 121.8, 107.9, 66.8, 40.0.

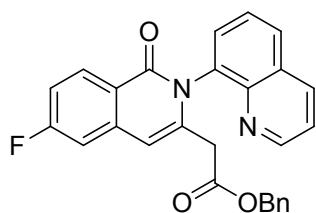

**Benzyl 2-(6-fluoro-1-oxo-2-(quinolin-8-yl)-1,2-dihydroisoquinolin-3-yl)acetate (5b)**

Following the general procedure II, 4-fluoro-*N*-(quinolin-8-yl)benzamide (26.6 mg, 0.1 mmol), benzyl buta-2,3-dienoate (53 mg, 0.3 mmol), Co(acac)<sub>2</sub> (5.4 mg, 0.02 mmol), Mn(OAc)<sub>2</sub> (35 mg, 0.2 mmol), KOAc (39.8 mg, 0.2 mmol), and TFE 1.0 ml were used. Resulting solution was purged with O<sub>2</sub> balloon for 0.5 min, then the reaction mixture was stirred at 80 °C for 3.0 h. After completion of the reaction, the reaction mixture was diluted with EtOAc and washed once with saturated brine. Then organic layer was dried over Na<sub>2</sub>SO<sub>4</sub> and concentrated on rotavapor under reduced pressure. Finally, the residue was purified by silica gel column chromatography (Petroleum ether:Ethyl acetate = 1:1) to **5b** (32.9 mg) in 75% yield. <sup>1</sup>H-NMR (400 MHz, CDCl<sub>3</sub>) δ (ppm) 8.85 (dd, *J* = 4.0, 1.6 Hz, 1H), 8.40 (m, 1H), 8.22 (dd, *J* = 8.0, 1.6 Hz, 1H), 7.91 (dd, *J* = 8.4, 1.6 Hz, 1H), 7.59 (dd, *J* = 7.2, 1.2 Hz, 1H), 7.48-7.42 (m, 2H), 7.34-7.31 (m, 3H), 7.19-7.17 (m, 5H), 6.57 (s, 1H), 4.90-4.89 (m, 2H), 3.40 (d, *J* = 17.2 Hz, 1H), 3.10 (d, *J* = 16.8 Hz, 1H); <sup>13</sup>C-NMR (100 MHz, CDCl<sub>3</sub>) δ (ppm) 169.1, 165.5 (d, *J*<sub>C-F</sub> = 251 Hz), 163.0, 144.4, 139.4 (d, *J*<sub>C-F</sub> = 10.6 Hz), 138.1, 136.5, 135.4, 135.1, 131.7 (d, *J*<sub>C-F</sub> = 10 Hz), 131.4, 129.8, 129.4, 128.7, 128.6, 126.3, 122.3, 122.1, 115.4 (d, *J*<sub>C-F</sub> = 23.3 Hz), 110.8 (d, *J*<sub>C-F</sub> = 21.8 Hz), 107.4 (d, *J*<sub>C-F</sub> = 3 Hz), 67.1, 40.1; MS (ESI) calcd for C<sub>27</sub>H<sub>19</sub>FN<sub>2</sub>O<sub>3</sub> [M+H]<sup>+</sup>: 438.14, found 439.12.

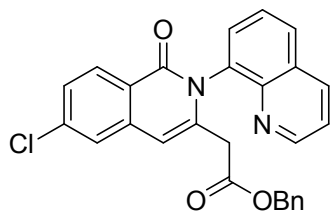

**Benzyl 2-(6-chloro-1-oxo-2-(quinolin-8-yl)-1,2-dihydroisoquinolin-3-yl)acetate (5c)**

Following the general procedure II, 4-chloro-*N*-(quinolin-8-yl)benzamide (28.2 mg, 0.1 mmol), benzyl buta-2,3-dienoate (53 mg, 0.3 mmol), Co(acac)<sub>2</sub> (5.4 mg, 0.02 mmol), Mn(OAc)<sub>2</sub> (35 mg, 0.2 mmol), KOAc (39.8 mg, 0.2 mmol), and TFE 1.0 ml were used. Resulting solution was purged with O<sub>2</sub> balloon for 0.5 min, then the reaction mixture was stirred at 80 °C for 3.0 h. After completion of the reaction, the reaction mixture was diluted with EtOAc and washed once with saturated brine. Then organic layer was dried over Na<sub>2</sub>SO<sub>4</sub> and concentrated on rotavapor under reduced pressure. Finally, the residue was purified by silica gel column chromatography (Petroleum ether:Ethyl acetate = 1:1) to **5c** (30 mg) in 67% yield.

<sup>1</sup>H-NMR (400 MHz, CDCl<sub>3</sub>) δ (ppm) 8.84 (d, *J* = 2.8 Hz, 1H), 8.31 (d, *J* = 8.4 Hz, 1H), 8.22 (d, *J* = 8.0 Hz, 1H), 7.91 (d, *J* = 8.0 Hz, 1H), 7.58 (d, *J* = 6.8 Hz, 1H), 7.53 (s, 1H), 7.49-7.40 (m, 3H), 7.35-7.28 (m, 3H), 7.17 (d, *J* = 4.0 Hz, 2H), 4.95-4.89 (m, 2H), 3.39 (d, *J* = 16.8 Hz, 1H), 3.10 (d, *J* = 16.8 Hz, 1H); <sup>13</sup>C-NMR (100 MHz, CDCl<sub>3</sub>) δ (ppm) 169.1, 163.1, 151.7, 144.4, 139.2, 138.4, 138.2, 136.5, 135.4, 135.2, 131.3, 130.3, 129.8, 129.5, 128.7, 128.7, 128.7, 127.3, 126.3, 125.3, 124.0, 122.1, 107.0, 67.1, 40.2; MS (ESI) calcd for C<sub>27</sub>H<sub>19</sub>ClN<sub>2</sub>O<sub>3</sub> [M+H]<sup>+</sup>: 454.12, found 455.02.

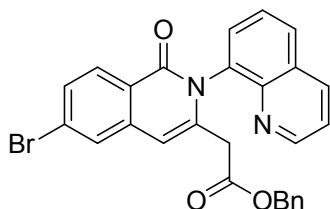

**Benzyl 2-(6-bromo-1-oxo-2-(quinolin-8-yl)-1,2-dihydroisoquinolin-3-yl)acetate (5d)**

Following the general procedure II, 4-bromo-*N*-(quinolin-8-yl)benzamide (33 mg, 0.1 mmol), benzyl buta-2,3-dienoate (53 mg, 0.3 mmol), Co(acac)<sub>2</sub> (5.4 mg, 0.02 mmol), Mn(OAc)<sub>2</sub> (35 mg, 0.2 mmol), KOAc (20 mg, 0.2 mmol), and TFE 1.0 ml were used. Resulting solution was purged with O<sub>2</sub> balloon for 0.5 min, then the reaction mixture was stirred at 80 °C for 3.0 h. After completion of the reaction, the reaction mixture was diluted with EtOAc and washed once with H<sub>2</sub>O. Then organic layer was dried over Na<sub>2</sub>SO<sub>4</sub> and concentrated on rotavapor under reduced pressure. Finally, the residue was purified by silica gel column chromatography (Petroleum ether:Ethyl acetate = 1:1) to **5d** (36 mg) in 72% yield. <sup>1</sup>H-NMR (400 MHz, CDCl<sub>3</sub>) δ (ppm) 8.83 (m, 1H), 8.22 (t, *J* = 8.8 Hz, 2H), 7.90 (d, *J* = 8.0 Hz, 1H), 7.70 (s, 1H), 7.57 (t, *J* = 8.4 Hz, 2H), 7.48-7.40 (m, 2H), 7.34-7.32 (m, 3H), 7.18-7.16 (m, 2H), 6.52 (s, 1H), 4.90-4.89 (m, 2H), 3.40

(d,  $J = 16.8$  Hz, 1H), 3.10 (d,  $J = 16.8$  Hz, 1H);  $^{13}\text{C}$ -NMR (100 MHz,  $\text{CDCl}_3$ )  $\delta$  (ppm) 169.2, 163.0, 151.6, 144.3, 138.6, 138.2, 136.5, 135.4, 135.1, 131.3, 130.3, 130.0, 129.8, 129.4, 128.7, 128.7, 128.6, 128.6, 128.4, 127.8, 126.3, 124.3, 122.1, 106.8, 67.1, 40.1; MS (ESI) calcd for  $\text{C}_{27}\text{H}_{19}\text{BrN}_2\text{O}_3$   $[\text{M}+\text{H}]^+$ : 498.06, found 498.99.

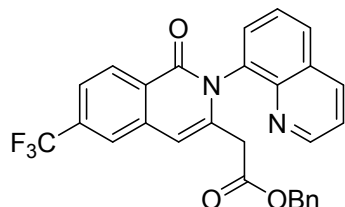

**Benzyl 2-(1-oxo-2-(quinolin-8-yl)-6-(trifluoromethyl)-1,2-dihydroisoquinolin-3-yl)acetate (5e)**

Following the general procedure II, *N*-(quinolin-8-yl)-4-(trifluoromethyl)benzamide (32 mg, 0.1 mmol), benzyl buta-2,3-dienoate (53 mg, 0.3 mmol),  $\text{Co}(\text{acac})_2$  (5.4 mg, 0.02 mmol),  $\text{Mn}(\text{OAc})_2$  (35 mg, 0.2 mmol), KOAc (20 mg, 0.2 mmol), and TFE 1.0 ml were used. Resulting solution was purged with  $\text{O}_2$  balloon for 0.5 min, then the reaction mixture was stirred at 80 °C for 3.0 h. After completion of the reaction, the reaction mixture was diluted with EtOAc and washed once with  $\text{H}_2\text{O}$ . Then organic layer was dried over  $\text{Na}_2\text{SO}_4$  and concentrated on rotavapor under reduced pressure. Finally, the residue was purified by silica gel column chromatography (Petroleum ether:Ethyl acetate = 1:1) to **5e** (34 mg) in 70% yield.  $^1\text{H}$ -NMR (400 MHz,  $\text{CDCl}_3$ )  $\delta$  (ppm) 8.83 (dd,  $J = 4.0, 1.6$  Hz, 1H), 8.49 (d,  $J = 8.4$  Hz, 1H), 8.23 (dd,  $J = 8.4, 1.6$  Hz, 1H), 7.92 (dd,  $J = 8.4, 1.2$  Hz, 1H), 7.83 (s, 1H), 7.67 (d,  $J = 8.4$  Hz, 1H), 7.59 (dd,  $J = 7.2, 1.2$  Hz, 1H), 7.49-7.42 (m, 2H), 7.34-7.31 (m, 3H), 7.19-7.17 (m, 2H), 4.95-4.87 (m, 1H), 3.42 (d,  $J = 16.8$  Hz, 1H), 3.11 (d,  $J = 16.8$  Hz, 1H); MS (ESI) calcd for  $\text{C}_{28}\text{H}_{19}\text{F}_3\text{N}_2\text{O}_3$   $[\text{M}+\text{H}]^+$ : 488.13, found 489.04.

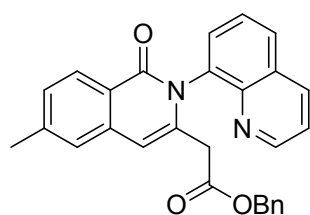

**Benzyl 2-(6-methyl-1-oxo-2-(quinolin-8-yl)-1,2-dihydroisoquinolin-3-yl)acetate (5f)**

Following the general procedure II, 4-methyl-*N*-(quinolin-8-yl)benzamide (26.2 mg, 0.1 mmol), benzyl buta-2,3-dienoate (53 mg, 0.3 mmol),  $\text{Co}(\text{acac})_2$  (5.4 mg, 0.02 mmol),  $\text{Mn}(\text{OAc})_2$  (35 mg, 0.2 mmol), KOAc (20 mg, 0.2 mmol), and TFE 1.0 ml were used. Resulting solution was purged with  $\text{O}_2$  balloon for 0.5 min, then the reaction mixture was stirred at 80 °C for 3.0 h. After completion of the reaction, the reaction mixture was diluted with EtOAc and washed once with  $\text{H}_2\text{O}$ . Then organic layer was dried over  $\text{Na}_2\text{SO}_4$  and concentrated on rotavapor under reduced pressure. Finally, the residue was purified by silica gel column chromatography (Petroleum ether:Ethyl

acetate = 1:1) to **5f** (25 mg) in 57% yield. <sup>1</sup>H-NMR (400 MHz, CDCl<sub>3</sub>) δ (ppm) 8.84 (dd, *J* = 4.4, 1.6 Hz, 1H), 8.27 (d, *J* = 8.0 Hz, 1H), 8.21 (dd, *J* = 8.4, 1.6 Hz, 1H), 7.89 (dd, *J* = 8.4, 1.2 Hz, 1H), 7.58 (dd, *J* = 7.2, 1.2 Hz, 1H), 7.48-7.40 (m, 2H), 7.34-7.28 (m, 5H), 7.18-7.15 (m, 2H), 6.56 (s, 1H), 4.90-4.88 (m, 2H), 3.39 (d, *J* = 16.8 Hz, 1H), 3.10 (d, *J* = 16.8 Hz, 1H), 2.50 (s, 3H); <sup>13</sup>C-NMR (100 MHz, CDCl<sub>3</sub>) δ (ppm) 169.4, 163.7, 151.6, 144.7, 143.3, 137.4, 136.5, 136.5, 135.9, 135.3, 131.6, 129.7, 129.5, 128.7, 128.7, 128.6, 128.5, 128.5, 126.4, 125.9, 123.6, 122.0, 108.0, 67.0, 40.2, 22.1; MS (ESI) calcd for C<sub>27</sub>H<sub>19</sub>BrN<sub>2</sub>O<sub>3</sub> [M+H]<sup>+</sup>: 434.16, found 435.18.

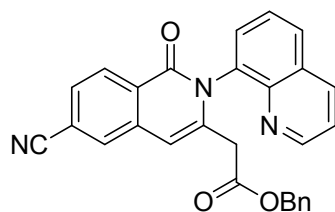

**Benzyl 2-(6-cyano-1-oxo-2-(quinolin-8-yl)-1,2-dihydroisoquinolin-3-yl)acetate (**5g**)**

Following the general procedure I, 4-cyano-*N*-(quinolin-8-yl)benzamide (27 mg, 0.1 mmol), benzyl buta-2,3-dienoate (53 mg, 0.3 mmol), Co(acac)<sub>2</sub> (5.4 mg, 0.02 mmol), Mn(OAc)<sub>2</sub> (35 mg, 0.2 mmol), KOAc (20 mg, 0.2 mmol), and TFE 1.0 ml were used. Resulting solution was purged with O<sub>2</sub> balloon for 0.5 min, then the reaction mixture was stirred at 80 °C for 3.0 h. After completion of the reaction, the reaction mixture was diluted with EtOAc and washed once with H<sub>2</sub>O. Then organic layer was dried over Na<sub>2</sub>SO<sub>4</sub> and concentrated on rotavapor under reduced pressure. Finally, the residue was purified by silica gel column chromatography (Petroleum ether:Ethyl acetate = 1:1) to **5g** (37 mg) in 80% yield. <sup>1</sup>H-NMR (400 MHz, CDCl<sub>3</sub>) δ (ppm) 8.83 (d, *J* = 2.8 Hz, 1H), 8.46 (d, *J* = 8.4 Hz, 1H), 8.23 (d, *J* = 8.0 Hz, 1H), 7.92 (d, *J* = 8.0 Hz, 1H), 7.87 (s, 1H), 7.65 (d, *J* = 8.0 Hz, 1H), 7.58 (d, *J* = 7.2 Hz, 1H), 7.49-7.43 (m, 2H), 7.34-7.33 (m, 3H), 7.17 (d, *J* = 4.0 Hz, 2H), 6.62 (s, 1H), 4.95-4.89 (m, 2H), 3.42 (d, *J* = 17.2 Hz, 1H), 3.11 (d, *J* = 16.8 Hz, 1H); <sup>13</sup>C-NMR (100 MHz, CDCl<sub>3</sub>) δ (ppm) 168.9, 162.6, 151.8, 144.1, 139.1, 137.2, 136.6, 135.0, 135.0, 131.1, 130.7, 130.1, 129.6, 129.5, 128.7, 128.7, 128.7, 128.6, 128.0, 126.4, 122.3, 118.4, 116.2, 106.8, 67.3, 40.1; MS (ESI) calcd for C<sub>28</sub>H<sub>19</sub>N<sub>3</sub>O<sub>3</sub> [M+H]<sup>+</sup>: 445.14, found 446.09.

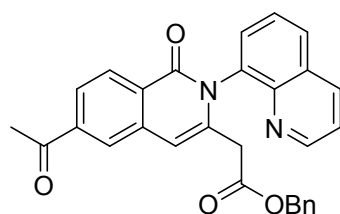

**Benzyl 2-(6-acetyl-1-oxo-2-(quinolin-8-yl)-1,2-dihydroisoquinolin-3-yl)acetate (**5h**)**

Following the general procedure I, 4-acetyl-*N*-(quinolin-8-yl)benzamide (29 mg, 0.1 mmol), benzyl buta-2,3-dienoate (53 mg, 0.3 mmol), Co(acac)<sub>2</sub> (5.4 mg, 0.02 mmol), Mn(OAc)<sub>2</sub> (35 mg, 0.2 mmol), KOAc (20 mg, 0.2 mmol), and TFE 1.0 ml were used. Resulting solution was purged with O<sub>2</sub> balloon for 0.5 min, then the reaction mixture

was stirred at 80 °C for 3.0 h. After completion of the reaction, the reaction mixture was diluted with EtOAc and washed once with H<sub>2</sub>O. Then organic layer was dried over Na<sub>2</sub>SO<sub>4</sub> and concentrated on rotavapor under reduced pressure. Finally, the residue was purified by silica gel column chromatography (Petroleum ether:Ethyl acetate = 1:1) to **5h** (38 mg) in 83% yield. <sup>1</sup>H-NMR (400 MHz, CDCl<sub>3</sub>) δ (ppm) 8.83 (dd, *J* = 4.0, 1.2 Hz, 1H), 8.46 (d, *J* = 8.4 Hz, 1H), 8.23 (dd, *J* = 8.4, 1.2 Hz, 1H), 8.13 (d, *J* = 0.8 Hz, 1H), 8.00 (dd, *J* = 8.4, 1.2 Hz, 1H), 7.92 (d, *J* = 7.6 Hz, 1H), 7.59 (d, *J* = 7.2 Hz, 1H), 7.49-7.42 (m, 2H), 7.34-7.32 (m, 3H), 7.18-7.17(m, 2H), 6.70 (s, 1H), 4.95-4.90 (m, 1H), 3.43 (d, *J* = 16.8 Hz, 1H), 3.12 (d, *J* = 16.8 Hz, 1H), 2.72 (s, 3H); <sup>13</sup>C-NMR (100 MHz, CDCl<sub>3</sub>) δ (ppm) 198.0, 169.1, 163.1, 151.7, 144.3, 140.1, 137.7, 137.1, 136.5, 135.4, 135.2, 131.3, 129.9, 129.5, 129.1, 128.7, 128.6, 128.6, 128.4, 126.6, 126.4, 125.5, 122.1, 108.0, 67.1, 40.1, 27.2; MS (ESI) calcd for C<sub>29</sub>H<sub>22</sub>N<sub>2</sub>O<sub>4</sub> [M+H]<sup>+</sup>: 462.16, found 463.11.

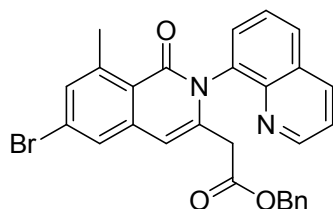

**Benzyl 2-(6-bromo-8-methyl-1-oxo-2-(quinolin-8-yl)-1,2-dihydroisoquinolin-3-yl)acetate (5i)**

Following the general procedure I, 4-bromo-2-methyl-N-(quinolin-8-yl)benzamide (34 mg, 0.1 mmol), benzyl buta-2,3-dienoate (53 mg, 0.3 mmol), Co(acac)<sub>2</sub> (5.4 mg, 0.02 mmol), Mn(OAc)<sub>2</sub> (35 mg, 0.2 mmol), KOAc (20 mg, 0.2 mmol), and TFE 1.0 ml were used. Resulting solution was purged with O<sub>2</sub> balloon for 0.5 min, then the reaction mixture was stirred at 80 °C for 3.0 h. After completion of the reaction, the reaction mixture was diluted with EtOAc and washed once with H<sub>2</sub>O. Then organic layer was dried over Na<sub>2</sub>SO<sub>4</sub> and concentrated on rotavapor under reduced pressure. Finally, the residue was purified by silica gel column chromatography (Petroleum ether:Ethyl acetate = 1:1) to **5i** (35 mg) in 68% yield. <sup>1</sup>H-NMR (400 MHz, CDCl<sub>3</sub>) δ (ppm) 8.85 (dd, *J* = 4.0, 1.6 Hz, 1H), 8.21 (dd, *J* = 8.4, 2.0 Hz, 1H), 7.89 (dd, *J* = 8.0, 1.2 Hz, 1H), 7.58 (d, *J* = 1.2 Hz, 1H), 7.56 (d, *J* = 1.2 Hz, 1H), 7.52 (d, *J* = 2.0 Hz, 1H), 7.48-7.41 (m, 2H), 7.35-7.31(m, 3H), 7.18-7.15 (m, 2H), 6.45 (s, 1H), 4.95-4.89 (m, 2H), 3.34 (d, *J* = 16.8 Hz, 1H), 3.04 (d, *J* = 16.8 Hz, 1H), 2.79 (s, 3H); <sup>13</sup>C-NMR (100 MHz, CDCl<sub>3</sub>) δ (ppm) 169.1, 164.0, 151.7, 144.8, 144.4, 140.2, 137.7, 136.6, 135.8, 135.2, 132.6, 131.4, 129.7, 129.5, 128.7, 128.7, 128.6, 126.7, 126.7, 126.4, 122.8, 122.1, 107.3, 67.1, 40.0, 23.7; MS (ESI) calcd for C<sub>28</sub>H<sub>21</sub>BrN<sub>2</sub>O<sub>3</sub> [M+H]<sup>+</sup>: 512.07, found 512.93.

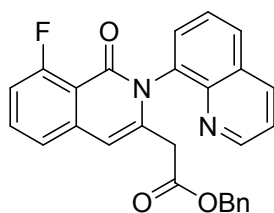

**Benzyl 2-(8-fluoro-1-oxo-2-(quinolin-8-yl)-1,2-dihydroisoquinolin-3-yl)acetate (5j)**

Following the general procedure I, 4-bromo-2-methyl-N-(quinolin-8-yl)benzamide (34 mg, 0.1 mmol), benzyl buta-2,3-dienoate (53 mg, 0.3 mmol), Co(acac)<sub>2</sub> (5.4 mg, 0.02 mmol), Mn(OAc)<sub>2</sub> (35 mg, 0.2 mmol), KOAc (20 mg, 0.2 mmol), and TFE 1.0 ml were used. Resulting solution was purged with O<sub>2</sub> balloon for 0.5 min, then the reaction mixture was stirred at 80 °C for 3.0 h. After completion of the reaction, the reaction mixture was diluted with EtOAc and washed once with H<sub>2</sub>O. Then organic layer was dried over Na<sub>2</sub>SO<sub>4</sub> and concentrated on rotavapor under reduced pressure. Finally, the residue was purified by silica gel column chromatography (Petroleum ether:Ethyl acetate = 1:1) to **5j** (34 mg) in 78% yield. <sup>1</sup>H-NMR (400 MHz, CDCl<sub>3</sub>) δ (ppm) 8.84 (dd, *J* = 4.4, 1.6 Hz, 1H), 8.20 (dd, *J* = 8.4, 1.6 Hz, 1H), 7.89 (dd, *J* = 8.0, 1.2 Hz, 1H), 7.61-7.56 (m, 2H), 7.48-7.41 (m, 2H), 7.35-7.29 (m, 4H), 7.18-7.15 (m, 2H), 7.13-7.08 (m, 1H), 6.58 (d, *J* = 1.6 Hz, 1H), 4.94-4.86 (m, 2H), 3.38 (d, *J* = 17.2 Hz, 1H), 3.10 (d, *J* = 16.8 Hz, 1H); <sup>13</sup>C-NMR (100 MHz, CDCl<sub>3</sub>) δ (ppm) 169.1, 162.9 (d, *J*<sub>C-F</sub> = 263 Hz), 160.8 (d, *J*<sub>C-F</sub> = 4.8 Hz), 144.5, 139.9, 137.8, 136.5, 135.2 (d, *J*<sub>C-F</sub> = 12 Hz), 133.6 (d, *J*<sub>C-F</sub> = 12 Hz), 131.6, 129.7, 129.4, 128.7, 128.6 (d, *J*<sub>C-F</sub> = 3.7 Hz), 126.3, 122.0, 121.9 (d, *J*<sub>C-F</sub> = 4.3 Hz), 114.8 (d, *J*<sub>C-F</sub> = 5.7 Hz), 113.7 (d, *J*<sub>C-F</sub> = 3.7 Hz), 107.3 (d, *J*<sub>C-F</sub> = 4.0 Hz), 67.1, 40.1; MS (ESI) calcd for C<sub>27</sub>H<sub>19</sub>FN<sub>2</sub>O<sub>3</sub> [M+H]<sup>+</sup>: 438.14, found 439.07.

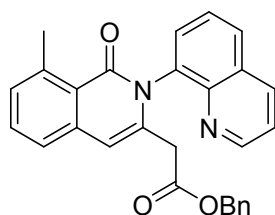**Benzyl 2-(8-methyl-1-oxo-2-(quinolin-8-yl)-1,2-dihydroisoquinolin-3-yl)acetate (5k)**

Following the general procedure I, 2-methyl-N-(quinolin-8-yl)benzamide (27 mg, 0.1 mmol), benzyl buta-2,3-dienoate (53 mg, 0.3 mmol), Co(acac)<sub>2</sub> (5.4 mg, 0.02 mmol), Mn(OAc)<sub>2</sub> (35 mg, 0.2 mmol), KOAc (20 mg, 0.2 mmol), and TFE 1.0 ml were used. Resulting solution was purged with O<sub>2</sub> balloon for 0.5 min, then the reaction mixture was stirred at 80 °C for 3.0 h. After completion of the reaction, the reaction mixture was diluted with EtOAc and washed once with saturated aqueous NaHCO<sub>3</sub>. Then organic layer was dried over Na<sub>2</sub>SO<sub>4</sub> and concentrated on rotavapor under reduced pressure. Finally, the residue was purified by silica gel column chromatography (Petroleum ether:Ethyl acetate = 1:1) to **5k** (26 mg) in 60% yield. <sup>1</sup>H-NMR (400 MHz, CDCl<sub>3</sub>) δ (ppm) 8.87-8.86 (m, 1H), 8.21 (dd, *J* = 8.0 Hz, *J* = 1.2 Hz, 1H), 7.89 (d, *J* = 8.4 Hz, 1H), 7.60 (d, *J* = 6.4 Hz, 1H), 7.52-7.45 (m, 2H), 7.44-7.41 (m, 1H), 7.38-7.32 (m, 5H), 7.23 (d, *J* = 7.2 Hz, 1H), 7.18-7.16 (m, 2H), 6.57 (s, 1H), 4.93-4.86 (m, 2H), 3.37 (d, *J* = 16.8 Hz, 1H), 3.06 (d, *J* = 16.8 Hz, 1H), 2.85 (s, 1H); <sup>13</sup>C-NMR (100 MHz, CDCl<sub>3</sub>) δ (ppm) 169.4, 164.5, 151.6, 144.6, 142.4, 138.9, 136.5, 136.2, 135.2, 132.0, 131.6, 130.0, 129.5, 128.7, 126.4, 124.5, 124.1, 122.0, 108.5, 67.0, 40.0, 23.9; MS (ESI) calcd for C<sub>28</sub>H<sub>22</sub>N<sub>2</sub>O<sub>3</sub> [M+H]<sup>+</sup>: 435.16, found 435.08.

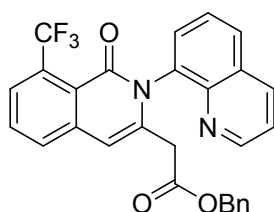

**Benzyl 2-(1-oxo-2-(quinolin-8-yl)-8-(trifluoromethyl)-1,2-dihydroisoquinolin-3-yl)acetate (5l)**

Following the general procedure I, *N*-(quinolin-8-yl)-2-(trifluoromethyl)benzamide (32 mg, 0.1 mmol), benzyl buta-2,3-dienoate (53 mg, 0.3 mmol), Co(acac)<sub>2</sub> (5.4 mg, 0.02 mmol), Mn(OAc)<sub>2</sub> (35 mg, 0.2 mmol), KOAc (20 mg, 0.2 mmol), and TFE 1.0 ml were used. Resulting solution was purged with O<sub>2</sub> balloon for 0.5 min, then the reaction mixture was stirred at 80 °C for 3.0 h. After completion of the reaction, the reaction mixture was diluted with EtOAc and washed once with H<sub>2</sub>O. Then organic layer was dried over Na<sub>2</sub>SO<sub>4</sub> and concentrated on rotavapor under reduced pressure. Finally, the residue was purified by silica gel column chromatography (Petroleum ether:Ethyl acetate = 1:1) to **5l** (36.5 mg) in 75% yield. <sup>1</sup>H-NMR (400 MHz, CDCl<sub>3</sub>) δ (ppm) 8.83 (dd, *J* = 4.0, 1.2 Hz, 1H), 8.20 (dd, *J* = 8.4, 1.2 Hz, 1H), 7.90-7.87 (m, 2H), 7.72-7.69 (m, 2H), 7.61 (d, *J* = 7.2 Hz, 1H), 7.48-7.40 (m, 2H), 7.34-7.32 (m, 3H), 7.17-7.15 (m, 2H), 6.62 (s, 1H), 4.94-4.89 (m, 2H), 3.39 (d, *J* = 16.8 Hz, 1H), 3.10 (d, *J* = 16.8 Hz, 1H); MS (ESI) calcd for C<sub>28</sub>H<sub>19</sub>F<sub>3</sub>N<sub>2</sub>O<sub>3</sub> [M+H]<sup>+</sup>: 489.13, found 489.04.

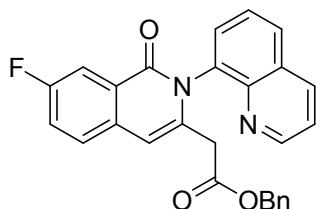

**Benzyl 2-(7-fluoro-1-oxo-2-(quinolin-8-yl)-1,2-dihydroisoquinolin-3-yl)acetate (5m)**

Following the general procedure I, *N*-(quinolin-8-yl)-2-(trifluoromethyl)benzamide (26.6 mg, 0.1 mmol), benzyl buta-2,3-dienoate (53 mg, 0.3 mmol), Co(acac)<sub>2</sub> (5.4 mg, 0.02 mmol), Mn(OAc)<sub>2</sub> (35 mg, 0.2 mmol), KOAc (20 mg, 0.2 mmol), and TFE 1.0 ml were used. Resulting solution was purged with O<sub>2</sub> balloon for 0.5 min, then the reaction mixture was stirred at 80 °C for 3.0 h. After completion of the reaction, the reaction mixture was diluted with EtOAc and washed once with H<sub>2</sub>O. Then organic layer was dried over Na<sub>2</sub>SO<sub>4</sub> and concentrated on rotavapor under reduced pressure. Finally, the residue was purified by silica gel column chromatography (Petroleum ether:Ethyl acetate = 1:1) to **5m** (28.9 mg) in 66% yield. <sup>1</sup>H-NMR (400 MHz, CDCl<sub>3</sub>) δ (ppm) 8.84 (dd, *J* = 4.4, 1.6 Hz, 1H), 8.22 (dd, *J* = 8.4, 1.6 Hz, 1H), 8.17 (d, *J* = 7.6 Hz, 1H), 7.91 (dd, *J* = 8.4, 1.2 Hz, 1H), 7.58 (dd, *J* = 7.6, 1.6 Hz, 1H), 7.48-7.35 (m, 4H), 7.34-7.31 (m, 3H), 7.18-7.15 (m, 2H), 6.86 (s, 1H), 4.90-4.89 (m, 2H), 3.45 (d, *J* = 17.2 Hz, 1H), 3.11 (d, *J* = 17.2 Hz, 1H); MS (ESI) calcd for C<sub>27</sub>H<sub>19</sub>FN<sub>2</sub>O<sub>3</sub> [M+H]<sup>+</sup>: 439.14, found

439.03.

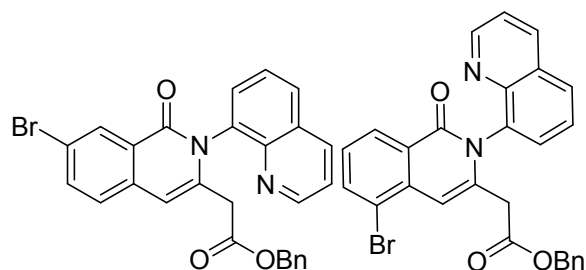

**Benzyl-2-(7-bromo-1-oxo-2-(quinolin-8-yl)-1,2-dihydroisoquinolin-3-yl)acetate (5n)**

**Benzyl-2-(5-bromo-1-oxo-2-(quinolin-8-yl)-1,2-dihydroisoquinolin-3-yl)acetate (5n')**

Following the general procedure I, 3-bromo-N-(quinolin-8-yl)benzamide (33 mg, 0.1 mmol), benzyl buta-2,3-dienoate (53 mg, 0.3 mmol), Co(acac)<sub>3</sub> (5.4 mg, 0.02 mmol), Mn(OAc)<sub>2</sub> (35 mg, 0.2 mmol), KOAc (20 mg, 0.2 mmol), and TFE 1.0 ml were used. Resulting solution was purged with O<sub>2</sub> balloon for 0.5 min, then the reaction mixture was stirred at 80 °C for 3.0 h. After completion of the reaction, the reaction mixture was diluted with EtOAc and washed once with H<sub>2</sub>O. Then organic layer was dried over Na<sub>2</sub>SO<sub>4</sub> and concentrated on rotavapor under reduced pressure. Finally, the residue was purified by silica gel column chromatography (Petroleum ether:Ethyl acetate = 1:1) to **5n** (22 mg) in 42% yield and **5n'** (15 mg) in 28% yield. For **5n**, <sup>1</sup>H-NMR (400 MHz, CDCl<sub>3</sub>) δ (ppm) 8.83 (dd, *J* = 4.4, 2.0 Hz, 1H), 8.51 (d, *J* = 2.0 Hz, 1H), 8.22 (dd, *J* = 8.0, 1.6 Hz, 1H), 7.91 (dd, *J* = 8.4, 1.6 Hz, 1H), 7.76 (d, *J* = 8.4, 2.0 Hz, 1H), 7.58 (d, *J* = 7.2, 1.2 Hz, 1H), 7.49-7.41 (m, 3H), 7.34-7.31 (m, 3H), 7.18-7.15 (m, 2H), 6.59 (s, 1H), 4.93-4.86 (m, 2H), 3.39 (d, *J* = 17.2 Hz, 1H), 3.08 (d, *J* = 17.2 Hz, 1H); <sup>13</sup>C-NMR (100 MHz, CDCl<sub>3</sub>) δ (ppm) 169.1, 162.5, 151.7, 144.4, 137.3, 136.5, 135.9, 135.9, 135.5, 135.2, 131.3, 131.1, 129.9, 129.5, 128.7, 128.7, 128.7, 127.8, 127.1, 126.4, 122.1, 120.6, 107.4, 67.1, 40.2; MS (ESI) calcd for C<sub>27</sub>H<sub>19</sub>BrN<sub>2</sub>O<sub>3</sub> [M+H]<sup>+</sup>: 498.06, found 498.94. For **5n'**, <sup>1</sup>H-NMR (400 MHz, CDCl<sub>3</sub>) δ (ppm) 8.84 (dd, *J* = 4.4, 1.6 Hz, 1H), 8.36 (d, *J* = 8.0 Hz, 1H), 8.22 (dd, *J* = 8.4, 1.6 Hz, 1H), 7.94-7.90 (m, 2H), 7.58 (dd, *J* = 7.2, 1.2 Hz, 1H), 7.48-7.42 (m, 2H), 7.35-7.30 (m, 4H), 7.18-7.16 (m, 2H), 7.00 (s, 1H), 4.94-4.86 (m, 2H), 3.49 (d, *J* = 17.2 Hz, 1H), 3.13 (d, *J* = 17.2 Hz, 1H), <sup>13</sup>C-NMR (100 MHz, CDCl<sub>3</sub>) δ (ppm) 169.1, 163.0, 151.7, 144.3, 138.0, 136.5, 136.5, 135.4, 135.2, 131.4, 129.9, 129.5, 128.7, 128.7, 128.7, 128.6, 128.2, 127.4, 127.3, 126.4, 122.2, 120.8, 106.7, 67.1, 40.5; MS (ESI) calcd for C<sub>27</sub>H<sub>19</sub>BrN<sub>2</sub>O<sub>3</sub> [M+H]<sup>+</sup>: 498.06, found 498.89.

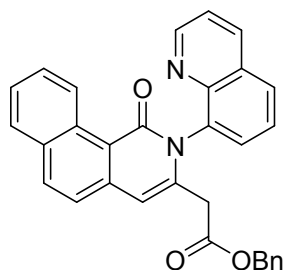

**Benzyl 2-(1-oxo-2-(quinolin-8-yl)-1,2-dihydrobenzo[*H*]isoquinolin-3-yl)acetate (5o)**

Following the general procedure II, *N*-(quinolin-8-yl)-1-naphthamide (29.8 mg, 0.1 mmol), benzyl buta-2,3-dienoate (53 mg, 0.3 mmol), Co(acac)<sub>2</sub> (5.4 mg, 0.02 mmol), Mn(OAc)<sub>2</sub> (35 mg, 0.2 mmol), KOAc (39.8 mg, 0.2 mmol), and TFE 1.0 ml were used. Resulting solution was purged with O<sub>2</sub> balloon for 0.5 min, then the reaction mixture was stirred at 80 °C for 3.5 h. After completion of the reaction, the reaction mixture was diluted with EtOAc and washed once with saturated brine. Then organic layer was dried over Na<sub>2</sub>SO<sub>4</sub> and concentrated on rotavapor under reduced pressure. Finally, the residue was purified by silica gel column chromatography (Petroleum ether:Ethyl acetate = 1:1) to **5o** (25 mg) in 53% yield. <sup>1</sup>H-NMR (400 MHz, CDCl<sub>3</sub>) δ (ppm) 10.03 (d, *J* = 8.8 Hz, 1H), 8.84 (d, *J* = 4.0 Hz, 1H), 8.24 (d, *J* = 8.4 Hz, 1H), 8.07 (d, *J* = 8.4 Hz, 1H), 7.94 (d, *J* = 8.4 Hz, 1H), 7.90 (d, *J* = 7.2 Hz, 1H), 7.67-7.53 (m, 4H), 7.52 (t, *J* = 8.0 Hz, 1H), 7.44 (dd, *J* = 8.0 Hz, *J* = 4.0 Hz, 1H), 7.34-7.32 (m, 3H), 7.20-7.17 (m, 2H), 6.79 (s, 1H), 4.93 (dd, *J* = 8.0 Hz, *J* = 17.6 Hz, 2H), 3.50 (d, *J* = 16.8 Hz, 1H), 3.19 (d, *J* = 16.8 Hz, 1H). <sup>13</sup>C-NMR (100 MHz, CDCl<sub>3</sub>) δ (ppm) 169.2, 164.2, 151.8, 144.5, 139.2, 138.0, 136.6, 136.3, 135.2, 134.4, 132.6, 132.3, 131.3, 129.7, 129.6, 128.8, 128.7, 128.5, 128.4, 127.5, 126.5, 126.4, 124.9, 122.2, 119.0, 108.8, 67.2, 40.2; MS (ESI) calcd for C<sub>31</sub>H<sub>22</sub>N<sub>2</sub>O<sub>3</sub> [M+H]<sup>+</sup>: 471.16, found 471.06.

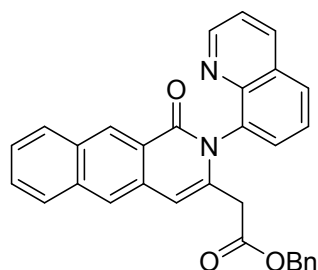

**Benzyl 2-(1-oxo-2-(quinolin-8-yl)-1,2-dihydrobenzo[*g*]isoquinolin-3-yl)acetate (5p)**

Following the general procedure II, *N*-(quinolin-8-yl)-2-naphthamide (29.8 mg, 0.1 mmol), benzyl buta-2,3-dienoate (53 mg, 0.3 mmol), Co(acac)<sub>2</sub> (5.4 mg, 0.02 mmol), Mn(OAc)<sub>2</sub> (35 mg, 0.2 mmol), KOAc (19.8 mg, 0.2 mmol), and TFE 1.0 ml were used. Resulting solution was purged with O<sub>2</sub> balloon for 0.5 min, then the reaction mixture was stirred at 80 °C for 3.0 h. After completion of the reaction, the reaction mixture was diluted with EtOAc and washed once with saturated brine. Then organic layer was dried over Na<sub>2</sub>SO<sub>4</sub> and concentrated on rotavapor under reduced pressure. Finally, the residue was purified by silica gel column chromatography (Petroleum ether:Ethyl acetate = 1:1) to **5p** (31 mg) in 67% yield. <sup>1</sup>H-NMR (400 MHz, CDCl<sub>3</sub>) δ (ppm) 9.01

(s, 1H), 8.85 (dd,  $J = 1.6$  Hz,  $J = 4.0$  Hz, 1H), 8.22 (dd,  $J = 1.6$  Hz,  $J = 8.4$  Hz, 1H), 8.03 (d,  $J = 8.4$  Hz, 1H), 8.02 (s, 1H), 7.95 (d,  $J = 8.4$  Hz, 1H), 7.91 (dd,  $J = 1.2$  Hz,  $J = 8.4$  Hz, 1H), 7.6m (dd,  $J = 1.6$  Hz,  $J = 7.6$  Hz, 1H), 7.59 (m, 1H), 7.49 (m, 2H), 7.43 (q,  $J = 4.0$  Hz, 1H), 7.32 (m, 3H), 7.17 (m, 1H), 6.74 (s, 1H), 4.91 (d,  $J = 12.0$  Hz, 1H), 4.87 (d,  $J = 12.0$  Hz, 1H), 3.43 (d,  $J = 17.2$  Hz, 1H), 3.12 (d,  $J = 17.2$  Hz, 1H).  $^{13}\text{C}$ -NMR (100 MHz,  $\text{CDCl}_3$ )  $\delta$  (ppm) 169.5, 164.1, 151.6, 144.7, 137.0, 136.5, 135.8, 135.4, 135.3, 133.0, 132.0, 131.6, 129.8, 129.8, 129.7, 129.4, 128.7, 128.6, 128.57, 128.2, 127.7, 126.3, 125.9, 124.2, 124.1, 122.0, 108.2, 67.0, 40.3; MS (ESI) calcd for  $\text{C}_{31}\text{H}_{22}\text{N}_2\text{O}_3$   $[\text{M}+\text{H}]^+$ : 471.16, found 471.09.

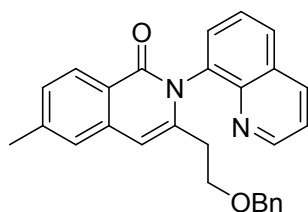

### 3-(2-(benzyloxy)ethyl)-6-methyl-2-(quinolin-8-yl)isoquinolin-1(2H)-one (5q)

Following the general procedure II, 4-methyl-*N*-(quinolin-8-yl)benzamide (26.2 mg, 0.1 mmol), benzyl buta-2,3-dienoate (53 mg, 0.3 mmol),  $\text{Co}(\text{acac})_2$  (5.4 mg, 0.02 mmol),  $\text{Mn}(\text{OAc})_2$  (35 mg, 0.2 mmol), KOAc (39.8 mg, 0.2 mmol), and TFE 1.0 ml were used. Resulting solution was purged with  $\text{O}_2$  balloon for 0.5 min, then the reaction mixture was stirred at 80 °C for 2.5 h. After completion of the reaction, the reaction mixture was diluted with EtOAc and washed once with saturated brine. Then organic layer was dried over  $\text{Na}_2\text{SO}_4$  and concentrated on rotavapor under reduced pressure. Finally, the residue was purified by silica gel column chromatography (Petroleum ether:Ethyl acetate = 1:1) to **5q** (26 mg) in 62% yield.  $^1\text{H}$ -NMR (400 MHz,  $\text{CDCl}_3$ )  $\delta$  (ppm) 8.83 (d,  $J = 2.8$  Hz, 1H), 8.27 (d,  $J = 8.4$  Hz, 1H), 8.21 (d,  $J = 8.4$  Hz, 1H), 7.94 (m, 1H), 7.63 (d,  $J = 4.8$  Hz, 1H), 7.40 (q,  $J = 4.4$  Hz, 4H), 7.32-7.25 (m, 5H), 7.19 (d,  $J = 7.2$  Hz, 2H), 6.48 (s, 1H), 4.35 (m, 2H), 3.57 (m, 1H), 3.50 (m, 1H), 2.50 (s, 3H).  $^{13}\text{C}$ -NMR (100 MHz,  $\text{CDCl}_3$ )  $\delta$  (ppm) 163.8, 151.5, 144.8, 143.1, 140.9, 138.0, 137.6, 137.59, 136.4, 130.6, 129.5, 129.3, 128.5, 128.3, 127.9, 127.8, 126.4, 125.5, 123.0, 121.9, 105.1, 73.1, 68.2, 33.6, 22.0; MS (ESI) calcd for  $\text{C}_{28}\text{H}_{24}\text{N}_2\text{O}_2$   $[\text{M}+\text{H}]^+$ : 421.18, found 421.19.

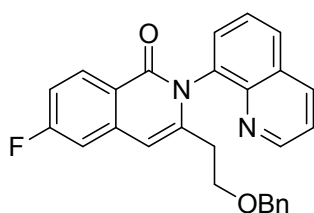

### 3-(2-(benzyloxy)ethyl)-6-fluoro-2-(quinolin-8-yl)isoquinolin-1(2H)-one (5r)

Following the general procedure II, 4-fluoro-*N*-(quinolin-8-yl)benzamide (26.2 mg, 0.1 mmol), benzyl buta-2,3-dienoate (53 mg, 0.3 mmol),  $\text{Co}(\text{acac})_2$  (5.4 mg, 0.02 mmol),

Mn(OAc)<sub>2</sub> (35 mg, 0.2 mmol), KOAc (39.8 mg, 0.2 mmol), and TFE 1.0 ml were used. Resulting solution was purged with O<sub>2</sub> balloon for 0.5 min, then the reaction mixture was stirred at 80 °C for 2.5 h. After completion of the reaction, the reaction mixture was diluted with EtOAc and washed once with saturated brine. Then organic layer was dried over Na<sub>2</sub>SO<sub>4</sub> and concentrated on rotavapor under reduced pressure. Finally, the residue was purified by silica gel column chromatography (Petroleum ether:Ethyl acetate = 1:1) to **5r** (32 mg) in 75% yield. <sup>1</sup>H-NMR (400 MHz, CDCl<sub>3</sub>) δ (ppm) 8.84 (dd, *J* = 4.0, 1.6 Hz, 1H), 8.39-8.35 (m, 1H), 8.23 (dd, *J* = 8.0, 1.6 Hz, 1H), 7.96 (dd, *J* = 6.8, 2.4 Hz, 1H), 7.67-7.61 (m, 2H), 7.44-7.41 (m, 1H), 7.32-7.27 (m, 3H), 7.21-7.19 (m, 2H), 7.16-7.11 (m, 2H), 6.48 (s, 1H), 4.37-4.36 (m, 2H), 3.61-3.46 (m, 2H), 2.47 (t, *J* = 6.8 Hz, 2H); <sup>13</sup>C-NMR (100 MHz, CDCl<sub>3</sub>) δ (ppm) 165.52 (d, *J*<sub>C-F</sub> = 250.52 Hz, 1C), 163.0, 151.5, 144.5, 142.5, 139.62 (d, *J*<sub>C-F</sub> = 10.68 Hz, 1C), 137.74, 136.22 (d, *J*<sub>C-F</sub> = 10.04 Hz, 1C), 130.38, 129.44, 128.55, 128.44, 127.99, 127.82, 127.78, 126.33, 121.92, 121.70, 114.7 (d, *J*<sub>C-F</sub> = 23.33 Hz, 1C), 110.4 (d, *J*<sub>C-F</sub> = 21.68 Hz, 1C), 104.5 (d, *J*<sub>C-F</sub> = 3.08 Hz, 1C), 73.0, 67.7, 33.5; MS (ESI) calcd for C<sub>27</sub>H<sub>21</sub>FN<sub>2</sub>O<sub>2</sub> [M+H]<sup>+</sup>: 424.16, found 425.08.

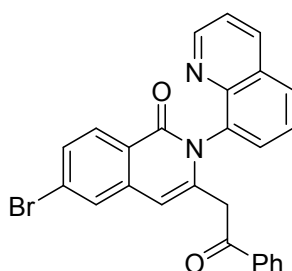

### 3-(2-oxo-2-phenylethyl)-2-(quinolin-8-yl)isoquinolin-1(2H)-one (**5s**)

Following the general procedure II, 4-bromo-*N*-(quinolin-8-yl)benzamide (32.6 mg, 0.1 mmol), 1-phenylbuta-2,3-dien-1-one (43.2 mg, 0.3 mmol), Co(acac)<sub>2</sub> (5.4 mg, 0.02 mmol), Mn(OAc)<sub>2</sub> (35 mg, 0.2 mmol), KOAc (39.8 mg, 0.2 mmol), and TFE 1.0 ml were used. Resulting solution was purged with O<sub>2</sub> balloon for 0.5 min, then the reaction mixture was stirred at 80 °C for 2.5 h. After completion of the reaction, the reaction mixture was diluted with EtOAc and washed once with saturated brine. Then organic layer was dried over Na<sub>2</sub>SO<sub>4</sub> and concentrated on rotavapor under reduced pressure. Finally, the residue was purified by silica gel column chromatography (Petroleum ether:Ethyl acetate = 1:1) to **5s** (28.5 mg) in 61% yield. <sup>1</sup>H-NMR (400 MHz, CDCl<sub>3</sub>) δ (ppm) 8.67 (d, *J* = 2.8 Hz, 1H), 8.16 (d, *J* = 8.4 Hz, 1H), 8.07 (d, *J* = 8.4 Hz, 1H), 7.76 (d, *J* = 8.0 Hz, 1H), 7.75 (s, 1H), 7.62 (d, *J* = 8.0 Hz, 1H), 7.55 (d, *J* = 8.0 Hz, 1H), 7.51 (m, 4H), 7.26 (m, 3H), 7.10 (s, 1H), 4.09 (d, *J* = 8.0 Hz, 2H), 4.07 (d, *J* = 8.0 Hz, 1H). <sup>13</sup>C-NMR (100 MHz, CDCl<sub>3</sub>) δ (ppm) 162.2, 160.4, 151.0, 144.2, 136.6, 136.4, 136.2, 133.8, 133.0, 130.7, 130.4, 130.3, 131.1, 129.6, 129.2, 129.1, 128.4, 128.3, 126.9, 126.2, 121.8, 112.0, 61.2; MS (ESI) calcd for C<sub>26</sub>H<sub>17</sub>BrN<sub>2</sub>O<sub>2</sub> [M+H]<sup>+</sup>: 469.05, found 469.04.

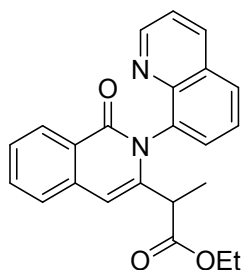

**Ethyl 2-(1-oxo-2-(quinolin-8-yl)-1,2-dihydroisoquinolin-3-yl)propanoate (5t)**

Following the general procedure II, *N*-(quinolin-8-yl)benzamide (24.8 mg, 0.1 mmol), ethyl 2-methylbuta-2,3-dienoate (37.8 mg, 0.3 mmol), Co(acac)<sub>2</sub> (5.4 mg, 0.02 mmol), Mn(OAc)<sub>2</sub> (35 mg, 0.2 mmol), KOAc (19.6 mg, 0.2 mmol), and TFE 1.0 ml were used. Resulting solution was purged with O<sub>2</sub> balloon for 0.5 min, then the reaction mixture was stirred at 80 °C for 3.5 h. After completion of the reaction, the reaction mixture was diluted with EtOAc and washed once with saturated brine. Then organic layer was dried over Na<sub>2</sub>SO<sub>4</sub> and concentrated on rotavapor under reduced pressure. Finally, the residue was purified by silica gel column chromatography (Petroleum ether:Ethyl acetate = 1:1) to **5t** (25 mg) (including two fraction 1F and 2F) in 67% yield. <sup>1</sup>H-NMR (400 MHz, CDCl<sub>3</sub>) δ (ppm) 8.87 (d, *J* = 4.0 Hz, 1H), 8.40 (m, *J* = 8.0 Hz, 1H), 8.27 (d, *J* = 8.4 Hz, 1H), 8.00 (d, *J* = 8.0 Hz, 1H), 7.73-7.67 (m, 3H), 7.61 (d, *J* = 8.4 Hz, 1H), 7.90 (d, *J* = 7.2 Hz, 1H), 7.67-7.53 (m, 4H), 7.52 (t, *J* = 8.0 Hz, 1H), 7.44 (dd, *J* = 8.0 Hz, *J* = 4.0 Hz, 1H), 7.34-7.32 (m, 3H), 6.69 (s, 1H), 4.01 (m, 2H), 3.50 (d, *J* = 7.2 Hz, 1H), 1.41 (d, *J* = 7.2 Hz, 3H), 1.08 (t, *J* = 7.2 Hz, 3H). <sup>13</sup>C-NMR (100 MHz, CDCl<sub>3</sub>) δ (ppm) 173.1, 163.6, 151.8, 142.7, 137.2, 136.5, 136.1, 135.9, 132.7, 131.7, 129.6, 129.5, 128.3, 126.7, 126.3, 126.2, 125.6, 122.0, 104.6, 61.2, 42.6, 18.7, 17.2; MS (ESI) calcd for C<sub>23</sub>H<sub>20</sub>N<sub>2</sub>O<sub>3</sub>[M+H]<sup>+</sup>: 273.15, found 273.08.

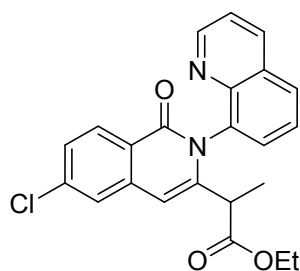

**Ethyl 2-(6-chloro-1-oxo-2-(quinolin-8-yl)-1,2-dihydroisoquinolin-3-yl)propanoate (5u)**

Following the general procedure II, 4-chloro-*N*-(quinolin-8-yl)benzamide (29 mg, 0.1 mmol), ethyl 2-methylbuta-2,3-dienoate (38 mg, 0.3 mmol), Co(acac)<sub>2</sub> (5.4 mg, 0.02 mmol), Mn(OAc)<sub>2</sub> (35 mg, 0.2 mmol), KOAc (20 mg, 0.2 mmol), and TFE 1.0 ml were used. Resulting solution was purged with O<sub>2</sub> balloon for 0.5 min, then the reaction mixture was stirred at 80 °C for 12 h. After completion of the reaction, the reaction mixture was diluted with EtOAc and washed once with saturated aqueous NaHCO<sub>3</sub>. Then organic layer was dried over Na<sub>2</sub>SO<sub>4</sub> and concentrated on rotavapor under reduced pressure. Finally, the residue was purified by silica gel column chromatography (Petroleum ether:Ethyl acetate = 1:1) to **5u** (28 mg) (including two fraction 1F and 2F)

in 70% yield.  $^1\text{H-NMR}$  (400 MHz,  $\text{CDCl}_3$ )  $\delta$  (ppm) 8.85 (s, 1H), 8.31-8.25 (m, 2H), 8.00 (br, 1H), 7.69-7.58 (m, 3H), 7.44-7.39 (m, 2H), 6.65 (s, 1H), 3.79-3.64 (m, 2H), 3.23-3.21 (m, 1H), 1.38 (br, 3H), 0.95 (br, 3H);  $^{13}\text{C-NMR}$  (100 MHz,  $\text{CDCl}_3$ )  $\delta$  (ppm) 172.0, 163.0, 151.3, 144.7, 144.4, 139.09, 138.4, 136.5, 136.2, 131.6, 130.19, 129.9, 129.53, 127.2, 126.3, 125.5, 123.78, 122.10, 103.8, 61.4, 42.7, 18.7, 17.2, 13.8;  $^1\text{H-NMR}$  (400 MHz,  $\text{CDCl}_3$ )  $\delta$  (ppm) 8.85 (s, 0.6H), 8.31-8.25 (m, 1.2H), 8.00 (br, 0.6H), 7.69-7.58 (m, 1.8H), 7.44-7.39 (m, 1.2H), 6.59 (s, 1H), 4.00-3.95 (m, 1.2H), 3.12-3.11 (m, 0.6H), 1.38 (br, 1.8H), 1.11 (br, 1.8fH);  $^{13}\text{C-NMR}$  (100 MHz,  $\text{CDCl}_3$ )  $\delta$  (ppm) 172.9, 163.0, 151.6, 144.6, 144.3, 139.07, 138.4, 135.5, 135.9, 131.6, 130.16, 129.8, 129.48, 127.2, 126.3, 125.5, 123.85, 122.12, 103.6, 61.1, 42.6, 18.7, 17.2, 14.1; MS (ESI) calcd for  $\text{C}_{23}\text{H}_{19}\text{ClN}_2\text{O}_3$   $[\text{M}+\text{H}]^+$ : 407.11, found 407.05.

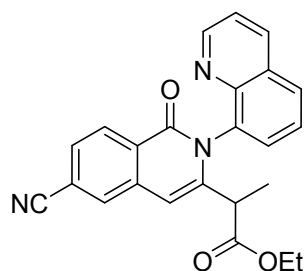

**Ethyl 2-(6-cyano-1-oxo-2-(quinolin-8-yl)-1,2-dihydroisoquinolin-3-yl)propanoate (5v)**

Following the general procedure II, 4-cyano-*N*-(quinolin-8-yl)benzamide (28 mg, 0.1 mmol), ethyl 2-methylbuta-2,3-dienoate (38 mg, 0.3 mmol),  $\text{Co}(\text{acac})_2$  (5.4 mg, 0.02 mmol),  $\text{Mn}(\text{OAc})_2$  (35 mg, 0.2 mmol),  $\text{KOAc}$  (20 mg, 0.2 mmol),  $\text{KOTf}$  (4 mg, 0.04 mmol), and TFE 1.0 ml were used. Resulting solution was purged with  $\text{O}_2$  balloon for 0.5 min, then the reaction mixture was stirred at 80 °C for 3 h. After completion of the reaction, the reaction mixture was diluted with EtOAc and washed once with saturated aqueous  $\text{NaHCO}_3$ . Then organic layer was dried over  $\text{Na}_2\text{SO}_4$  and concentrated on rotavapor under reduced pressure. Finally, the residue was purified by silica gel column chromatography (Petroleum ether:Ethyl acetate = 1:1) to **5v-2F** (32 mg) in 80% (including two fraction 1F and 2F) yield. **5v-2F**  $^1\text{H-NMR}$  (400 MHz,  $\text{CDCl}_3$ )  $\delta$  (ppm) 8.84 (m, 1H), 8.46 (dd,  $J = 2.8$  Hz,  $J = 8.0$  Hz, 1H), 8.27 (dd,  $J = 1.2$  Hz,  $J = 8.4$  Hz, 1H), 8.02 (dd,  $J = 3.6$  Hz,  $J = 6.0$  Hz, 1H), 7.94 (s, 1H), 7.69-7.64 (m, 3H), 7.48 (q,  $J = 4.0$  Hz, 1H), 6.67 (s, 1H), 3.99 (m, 2H), 3.13 (q,  $J = 6.8$  Hz, 1H), 1.40 (d,  $J = 7.2$  Hz, 1H), 1.10 (d,  $J = 7.2$  Hz, 1H).  $^{13}\text{C-NMR}$  (100 MHz,  $\text{CDCl}_3$ )  $\delta$  (ppm) 172.7, 162.5, 151.7, 145.2, 144.3, 137.2, 136.6, 135.1, 131.4, 130.95, 130.0, 129.5, 128.4, 127.9, 126.4, 122.3, 118.4, 116.1, 103.5, 61.5, 42.7, 17.1, 14.0. **5v-2F**  $^1\text{H-NMR}$  (400 MHz,  $\text{CDCl}_3$ )  $\delta$  (ppm) 8.85 (dd,  $J = 1.6$  Hz,  $J = 8.4$  Hz, 1H), 8.45 (d,  $J = 8.4$  Hz, 1H), 8.26 (dd,  $J = 1.6$  Hz,  $J = 8.4$  Hz, 1H), 8.03 (dd,  $J = 2.4$  Hz,  $J = 6.8$  Hz, 1H), 7.93 (s, 1H), 7.73-7.71 (m, 2H), 7.64 (d,  $J = 1.6$  Hz,  $J = 8.4$  Hz, 1H), 7.46-7.45 (m, 2H), 6.74 (s, 1H), 3.80 (m, 1H), 3.64 (m, 1H), 3.25 (m, 1H), 1.39 (d,  $J = 7.2$  Hz, 1H), 0.95 (d,  $J = 7.2$  Hz, 1H).  $^{13}\text{C-NMR}$  (100 MHz,  $\text{CDCl}_3$ )  $\delta$  (ppm) 171.8, 162.6, 151.4, 145.5, 144.6, 137.3, 136.3, 135.6, 131.0, 130.1, 130.08, 129.6, 129.5, 128.4, 128.0, 127.8, 126.4, 122.3, 118.4, 116.2, 103.7, 61.2, 42.7, 18.7, 13. MS (ESI) calcd for  $\text{C}_{24}\text{H}_{19}\text{N}_3\text{O}_3$   $[\text{M}+\text{H}]^+$ : 398.14, found:

398.06.

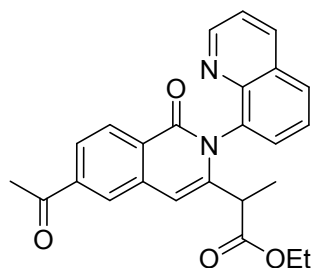

**Ethyl 2-(6-acetyl-1-oxo-2-(quinolin-8-yl)-1,2-dihydroisoquinolin-3-yl)propanoate (5w)**

Following the general procedure II, 4-acetyl-N-(quinolin-8-yl)benzamide (30 mg, 0.1 mmol), ethyl 2-methylbuta-2,3-dienoate (38 mg, 0.3 mmol), Co(acac)<sub>2</sub> (5.4 mg, 0.02 mmol), Mn(OAc)<sub>2</sub> (35 mg, 0.2 mmol), KOAc (20 mg, 0.2 mmol), and TFE 1.0 ml were used. Resulting solution was purged with O<sub>2</sub> balloon for 0.5 min, then the reaction mixture was stirred at 80 °C for 12 h. After completion of the reaction, the reaction mixture was diluted with EtOAc and washed once with saturated aqueous NaHCO<sub>3</sub>. Then organic layer was dried over Na<sub>2</sub>SO<sub>4</sub> and concentrated on rotavapor under reduced pressure. Finally, the residue was purified by silica gel column chromatography (Petroleum ether:Ethyl acetate = 1:1) to **5w** (28 mg) (including two fraction 1F and 2F) in 68% yield. **5w-1F** <sup>1</sup>H-NMR (400 MHz, CDCl<sub>3</sub>) δ (ppm) 8.85-8.84 (m, 1H), 8.45 (d, *J* = 8.4 Hz, 1H), 8.27 (dd, *J* = 8.4 Hz, *J* = 1.2 Hz, 1H), 8.19 (s, 1H), 8.01-7.97 (m, 2H), 7.72-7.65 (m, 2H), 7.48-7.45 (m, 1H), 6.76 (s, 1H), 4.04-3.93 (m, 2H), 3.17-3.12 (m, 1H), 2.72 (s, 3H), 1.40 (d, *J* = 7.2 Hz, 3H), 1.12 (t, *J* = 7.2 Hz, 3H); <sup>13</sup>C-NMR (100 MHz, CDCl<sub>3</sub>) δ (ppm) 198.1, 173.0, 163.1, 151.7, 144.6, 143.9, 140.1, 137.2, 136.6, 135.6, 131.6, 130.0, 129.5, 129.0, 128.3, 127.0, 126.4, 125.4, 122.2, 104.8, 61.4, 42.7, 27.2, 17.2, 14.1; **5w-2F** <sup>1</sup>H-NMR (400 MHz, CDCl<sub>3</sub>) δ (ppm) 8.86-8.84 (m, 1H), 8.45 (d, *J* = 8.4 Hz, 1H), 8.26 (dd, *J* = 8.4 Hz, *J* = 1.2 Hz, 1H), 8.17 (d, *J* = 0.8 Hz, 1H), 8.03-7.97 (m, 2H), 7.72-7.71 (m, 2H), 7.46-7.44 (m, 1H), 6.82 (s, 1H), 3.83-3.76 (m, 1H), 3.67-3.59 (m, 1H), 3.28-3.22 (m, 1H), 2.72 (s, 3H), 1.39 (d, *J* = 7.2 Hz, 3H), 0.95 (t, *J* = 7.2 Hz, 3H); <sup>13</sup>C-NMR (100 MHz, CDCl<sub>3</sub>) δ (ppm) 198.1, 172.1, 163.1, 151.4, 144.8, 144.1, 140.1, 137.2, 136.2, 136.0, 130.2, 129.9, 129.6, 129.0, 128.2, 127.0, 126.4, 125.4, 122.2, 104.9, 61.1, 42.6, 27.2, 18.7, 13.8; MS (ESI) calcd for C<sub>25</sub>H<sub>22</sub>N<sub>2</sub>O<sub>4</sub> [M+H]<sup>+</sup>: 415.16, found 415.05.

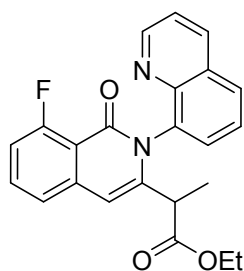

**Ethyl 2-(8-fluoro-1-oxo-2-(quinolin-8-yl)-1,2-dihydroisoquinolin-3-yl)propanoate (5x)**

Following the general procedure II, 2-fluoro-*N*-(quinolin-8-yl)benzamide (26.6 mg, 0.1 mmol), ethyl 2-methylbuta-2,3-dienoate (38 mg, 0.3 mmol), Co(acac)<sub>2</sub> (5.4 mg, 0.02 mmol), Mn(OAc)<sub>2</sub> (35 mg, 0.2 mmol), KOAc (20 mg, 0.2 mmol), and TFE 1.0 ml were used. Resulting solution was purged with O<sub>2</sub> balloon for 0.5 min, then the reaction mixture was stirred at 80 °C for 9 h. After completion of the reaction, the reaction mixture was diluted with EtOAc and washed once with saturated aqueous NaHCO<sub>3</sub>. Then organic layer was dried over Na<sub>2</sub>SO<sub>4</sub> and concentrated on rotavapor under reduced pressure. Finally, the residue was purified by silica gel column chromatography (Petroleum ether:Ethyl acetate = 1:1) to **5x** (30 mg) (including two fraction 1F and 2F) in 77% yield. **5x-1F** <sup>1</sup>H-NMR (400 MHz, CDCl<sub>3</sub>) δ (ppm) 8.87-8.85 (m, 1H), 8.25 (dd, *J* = 8.0 Hz, *J* = 1.6 Hz, 1H), 7.97 (dd, *J* = 7.6 Hz, *J* = 1.6 Hz, 1H), 7.70-7.63 (m, 2H), 7.62-7.56 (m, 2H), 7.46-7.43 (m, 1H), 7.35 (d, *J* = 8.0 Hz, 1H), 7.10-7.05 (m, 1H), 6.62 (d, *J* = 1.6 Hz, 1H), 4.04-3.92 (m, 2H), 3.15-3.10 (m, 1H), 1.38 (d, *J* = 7.2 Hz, 3H), 1.12 (t, *J* = 7.2 Hz, 3H); <sup>13</sup>C-NMR (100 MHz, CDCl<sub>3</sub>) δ (ppm) 173.0, 162.9 (d, *J*<sub>C-F</sub> = 263.2 Hz), 160.8 (d, *J*<sub>C-F</sub> = 4.7 Hz), 151.6, 144.8, 143.9, 140.0, 136.4 (d, *J*<sub>C-F</sub> = 17 Hz), 135.5, 133.5 (d, *J*<sub>C-F</sub> = 10 Hz), 131.9, 129.8, 129.6 (d, *J*<sub>C-F</sub> = 18 Hz), 126.3, 122.14 (d, *J*<sub>C-F</sub> = 4.5 Hz), 122.08, 114.7 (d, *J*<sub>C-F</sub> = 5.2 Hz), 113.5 (d, *J*<sub>C-F</sub> = 17 Hz), 104.0 (d, *J*<sub>C-F</sub> = 2.6 Hz), 61.4, 42.7, 17.1, 14.1; **5x-2F** <sup>1</sup>H-NMR (400 MHz, CDCl<sub>3</sub>) δ (ppm) 8.86-8.85 (m, 1H), 8.23 (d, *J* = 8.0 Hz, 1H), 8.00-7.97 (m, 1H), 7.70-7.68 (m, 2H), 7.61-7.56 (m, 1H), 7.45-7.42 (m, 2H), 7.34 (d, *J* = 8.0 Hz, 1H), 7.10-7.05 (m, 1H), 6.68 (s, 1H), 3.86-3.78 (m, 1H), 3.68-3.60 (m, 1H), 3.24-3.19 (m, 1H), 1.37 (d, *J* = 6.8 Hz, 3H), 0.95 (t, *J* = 7.2 Hz, 3H); <sup>13</sup>C-NMR (100 MHz, CDCl<sub>3</sub>) δ (ppm) 172.2, 162.9 (d, *J*<sub>C-F</sub> = 263.0 Hz), 160.7 (d, *J*<sub>C-F</sub> = 5.0 Hz), 151.3, 144.9, 144.1, 140.0, 136.2, 135.9, 133.5 (d, *J*<sub>C-F</sub> = 10 Hz), 130.5, 129.8, 129.5, 126.3, 122.12 (d, *J*<sub>C-F</sub> = 4.5 Hz), 122.07, 114.6 (d, *J*<sub>C-F</sub> = 5.2 Hz), 113.5 (d, *J*<sub>C-F</sub> = 21 Hz), 104.8 (d, *J*<sub>C-F</sub> = 2.4 Hz), 61.1, 42.6, 18.7, 13.8; MS (ESI) calcd for C<sub>23</sub>H<sub>19</sub>FN<sub>2</sub>O<sub>3</sub> [M+H]<sup>+</sup>: 391.14, found 391.66.

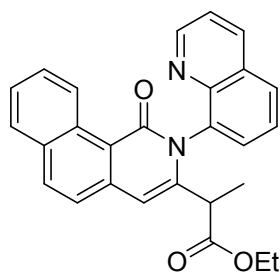

**Ethyl 2-(1-oxo-2-(quinolin-8-yl)-1,2-dihydrobenzo[h]isoquinolin-3-yl)propanoate (5y)**

Following the general procedure II, *N*-(quinolin-8-yl)-1-naphthamide (29.8 mg, 0.1 mmol), ethyl 2-methylbuta-2,3-dienoate (37.8 mg, 0.3 mmol), Co(acac)<sub>2</sub> (5.4 mg, 0.02 mmol), Mn(OAc)<sub>2</sub> (35 mg, 0.2 mmol), KOAc (39.8 mg, 0.2 mmol), and TFE 1.0 ml were used. Resulting solution was purged with O<sub>2</sub> balloon for 0.5 min, then the reaction mixture was stirred at 80 °C for 3.5 h. After completion of the reaction, the reaction mixture was diluted with EtOAc and washed once with saturated brine. Then organic layer was dried over Na<sub>2</sub>SO<sub>4</sub> and concentrated on rotavapor under reduced pressure. Finally, the residue was purified by silica gel column chromatography (Petroleum

ether:Ethyl acetate = 1:1) to **5y** (29 mg) (including two fraction 1F and 2F) in 69% yield. **5y-1F**  $^1\text{H-NMR}$  (400 MHz,  $\text{CDCl}_3$ )  $\delta$  (ppm) 10.04 (m, 1H), 8.84 (s, 1H), 8.26 (d,  $J = 8.0$  Hz, 1H), 8.07-8.01 (m, 2H), 7.89 (d,  $J = 8.4$  Hz, 1H), 7.78-7.13 (m, 2H), 7.62-7.53 (m, 4H), 7.52 (t,  $J = 8.0$  Hz, 1H), 7.44 (dd,  $J = 8.0$  Hz,  $J = 4.0$  Hz, 1H), 7.62-7.54 (m, 4H), 7.46-7.42 (m, 2H), 6.89 (s, 1H), 3.32-3.26 (m, 1H), 3.24-3.19 (m, 1H), 1.44 (m, 3H), 0.98 (t,  $J = 7.2$  Hz, 3H).  $^{13}\text{C-NMR}$  (100 MHz,  $\text{CDCl}_3$ )  $\delta$  (ppm) 173.0, 172.2, 164.0, 151.3, 144.9, 144.3, 139.2, 136.9, 136.5, 134.3, 132.5, 132.2, 131.6, 130.1, 129.7, 129.6, 128.4, 128.2, 127.5, 126.5, 126.4, 125.1, 122.1, 108.7, 105.5, 61.1, 42.8, 17.2, 13.8. **5y-2F**  $^1\text{H-NMR}$  (400 MHz,  $\text{CDCl}_3$ )  $\delta$  (ppm) 10.04 (m, 1H), 8.84 (s, 1H), 8.26 (d,  $J = 8.0$  Hz, 1H), 8.07-8.01 (m, 2H), 7.89 (d,  $J = 8.4$  Hz, 1H), 7.78-7.13 (m, 2H), 7.62-7.53 (m, 4H), 7.52 (t,  $J = 8.0$  Hz, 1H), 7.44 (dd,  $J = 8.0$  Hz,  $J = 4.0$  Hz, 1H), 7.62-7.54 (m, 4H), 7.46-7.42 (m, 2H), 6.82 (s, 1H), 4.01 (m, 2H), 1.44 (m, 3H), 1.11 (t,  $J = 7.2$  Hz, 3H).  $^{13}\text{C-NMR}$  (100 MHz,  $\text{CDCl}_3$ )  $\delta$  (ppm) 172.2, 171.6, 164.0, 151.7, 144.7, 144.1, 139.2, 136.5, 136.2, 134.3, 132.5, 132.2, 131.6, 130.1, 129.6, 129.56, 128.3, 128.2, 127.5, 126.4, 125.1, 122.1, 108.6, 105.4, 61.3, 42.8, 21.2, 17.2; MS (ESI) calcd for  $\text{C}_{27}\text{H}_{22}\text{N}_2\text{O}_3$   $[\text{M}+\text{H}]^+$ : 423.16, found 423.09.

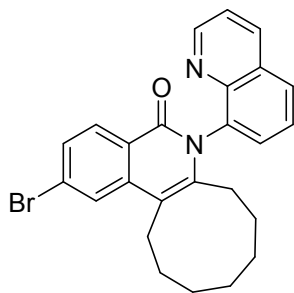

**2-bromo-6-(quinolin-8-yl)-6,7,8,9,10,11,12,13-octahydro-5H-cyclonona[c] isoquinolin-5-one (**5z**)**

Following the general procedure II, 4-bromo-*N*-(quinolin-8-yl)benzamide (32.6 mg, 0.1 mmol), cyclonona-1,2-diene (36.6 mg, 0.3 mmol),  $\text{Co}(\text{acac})_2$  (5.4 mg, 0.02 mmol),  $\text{Mn}(\text{OAc})_2$  (35 mg, 0.2 mmol), KOAc (19.6 mg, 0.2 mmol), and TFE 1.0 ml were used. Resulting solution was purged with  $\text{O}_2$  balloon for 0.5 min, then the reaction mixture was stirred at 80 °C for 6.0 h. After completion of the reaction, the reaction mixture was diluted with EtOAc and washed once with saturated brine. Then organic layer was dried over  $\text{Na}_2\text{SO}_4$  and concentrated on rotavapor under reduced pressure. Finally, the residue was purified by silica gel column chromatography (Petroleum ether:Ethyl acetate = 5:1) to **5z** (18.3 mg) (including two fraction 1F and 2F) in 41% yield.  $^1\text{H-NMR}$  (400 MHz,  $\text{CDCl}_3$ )  $\delta$  (ppm) 8.85 (dd,  $J = 1.2$  Hz,  $J = 4.0$  Hz, 1H), 8.30 (d,  $J = 8.4$  Hz, 1H), 8.24 (dd,  $J = 1.2$  Hz,  $J = 8.4$  Hz, 1H), 7.95 (dd,  $J = 2.0$  Hz,  $J = 7.2$  Hz, 1H), 7.88 (d,  $J = 1.6$  Hz, 1H), 7.68 (m, 1H), 7.54 (d,  $J = 1.6$  Hz,  $J = 8.8$  Hz, 1H), 7.42 (q,  $J = 4.0$  Hz, 1H), 3.02 (m, 1H), 2.93 (m, 1H), 2.64 (m, 1H), 2.22-2.15 (m, 1H), 1.82 (m, 2H), 1.62-1.21 (m, 14H).  $^{13}\text{C-NMR}$  (100 MHz,  $\text{CDCl}_3$ )  $\delta$  (ppm) 151.4, 144.7, 143.2, 138.9, 137.2, 136.3, 130.6, 130.5, 129.3, 129.2, 128.9, 127.9, 126.2, 126.0, 124.3, 121.9, 112.7, 29.6, 26.8, 26.7, 26.4, 25.8, 25.1, 22.7; MS (ESI) calcd for  $\text{C}_{25}\text{H}_{23}\text{BrN}_2\text{O}$   $[\text{M}+\text{H}]^+$ : 447.10, found: 447.06.
