# Supplementary figures and images for: Cobalt-catalyzed C–H activation and regioselective intermolecular annulation with allenes
Source: Royal Society of Chemistry journal article supplement (doi:10.1039/c6qo00567e), 2016-11-08

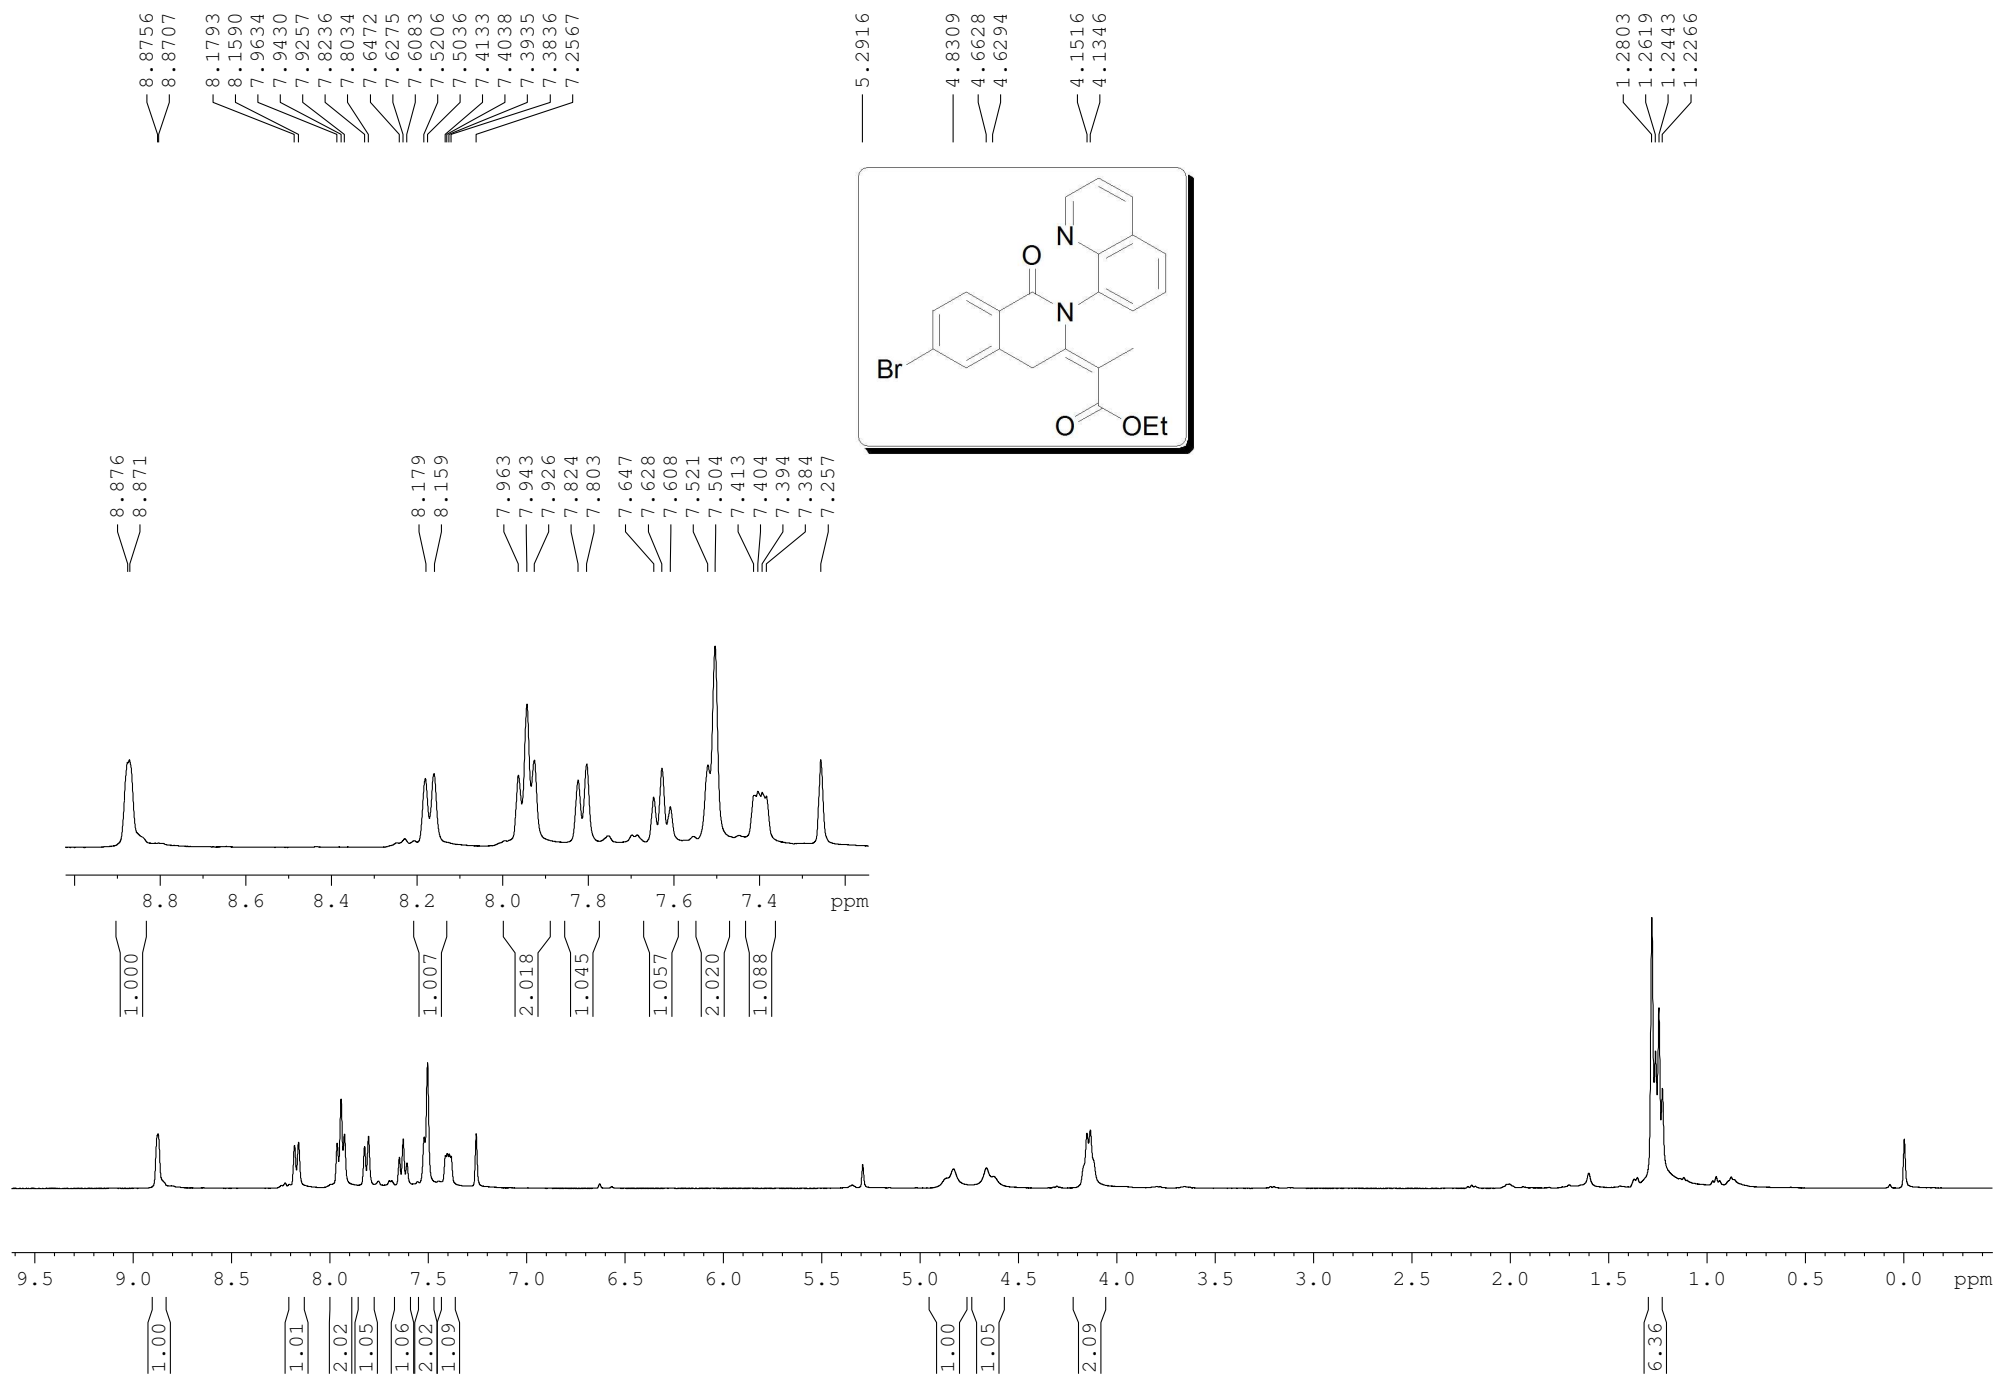

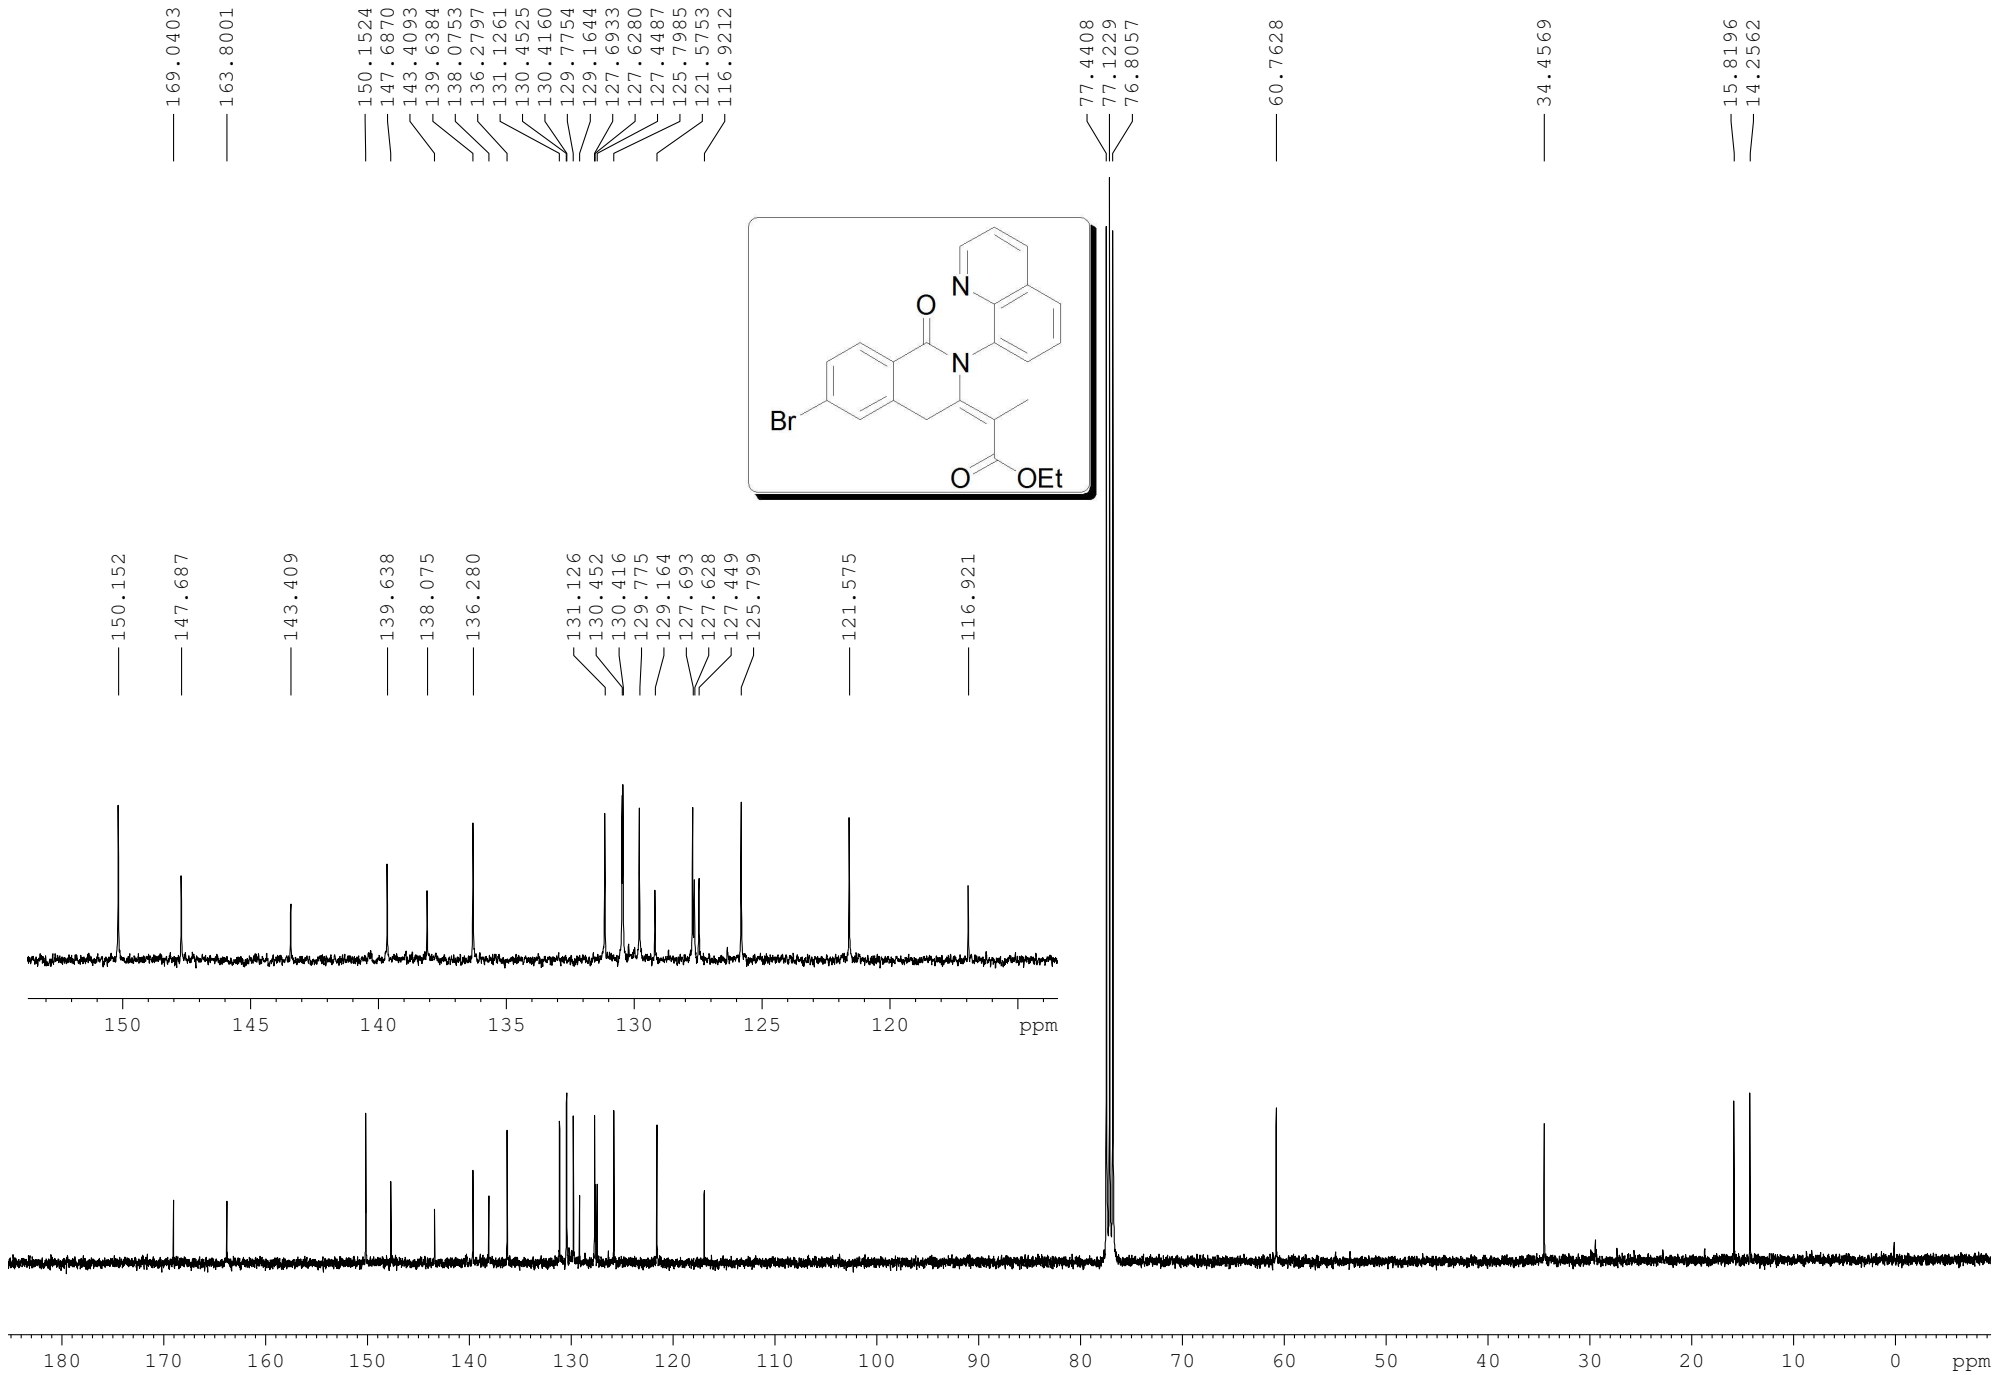

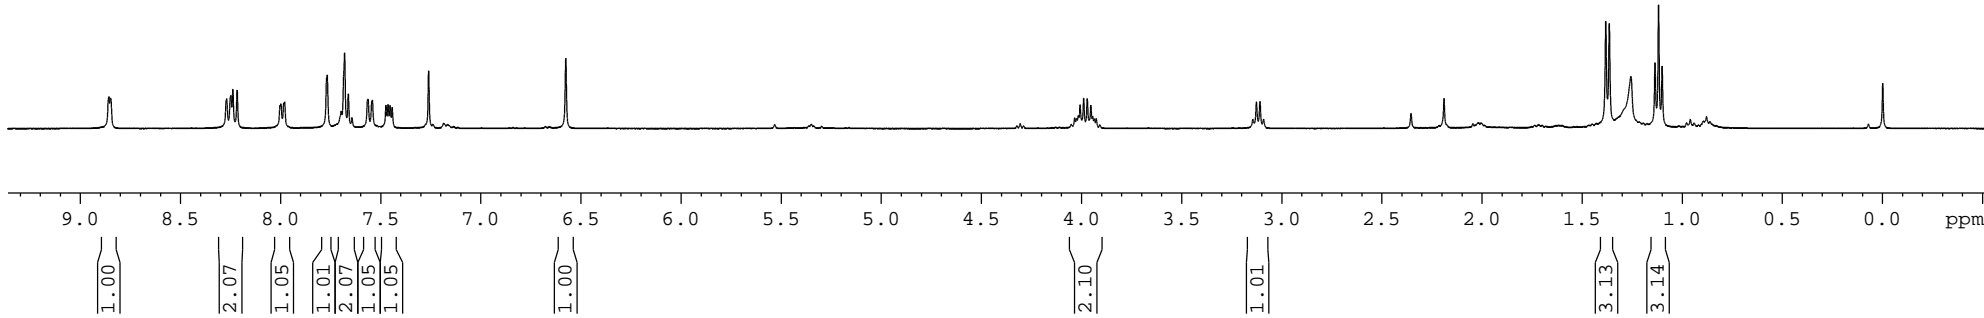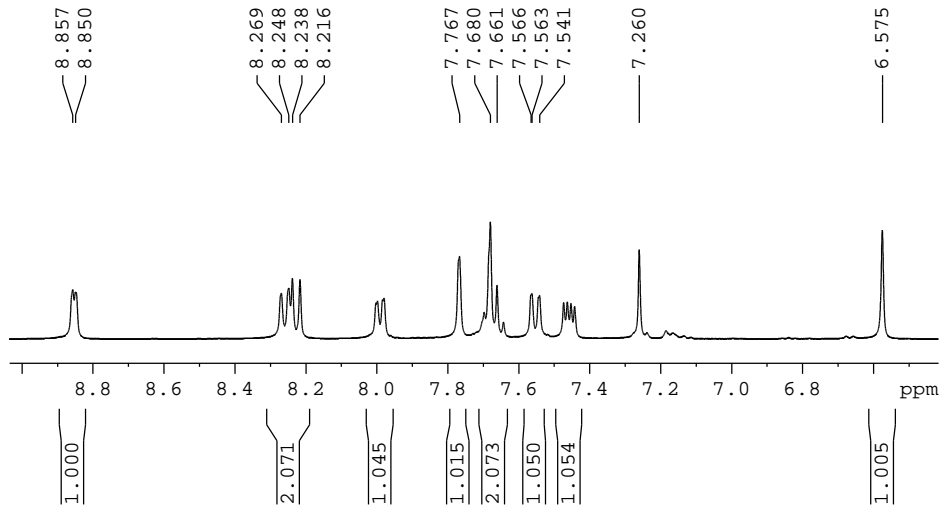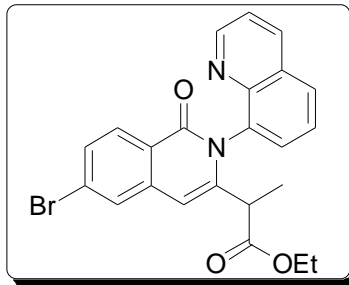

8.8569  
8.8495

8.2689  
8.2479  
8.2379  
8.2164

7.7667  
7.6798  
7.6612  
7.5656  
7.5625  
7.5410  
7.2603

6.5750

4.0081  
3.9902  
3.9721  
3.9543

3.1450  
3.1273  
3.1095  
3.0916

1.3827  
1.3648  
1.1366  
1.1189  
1.1011

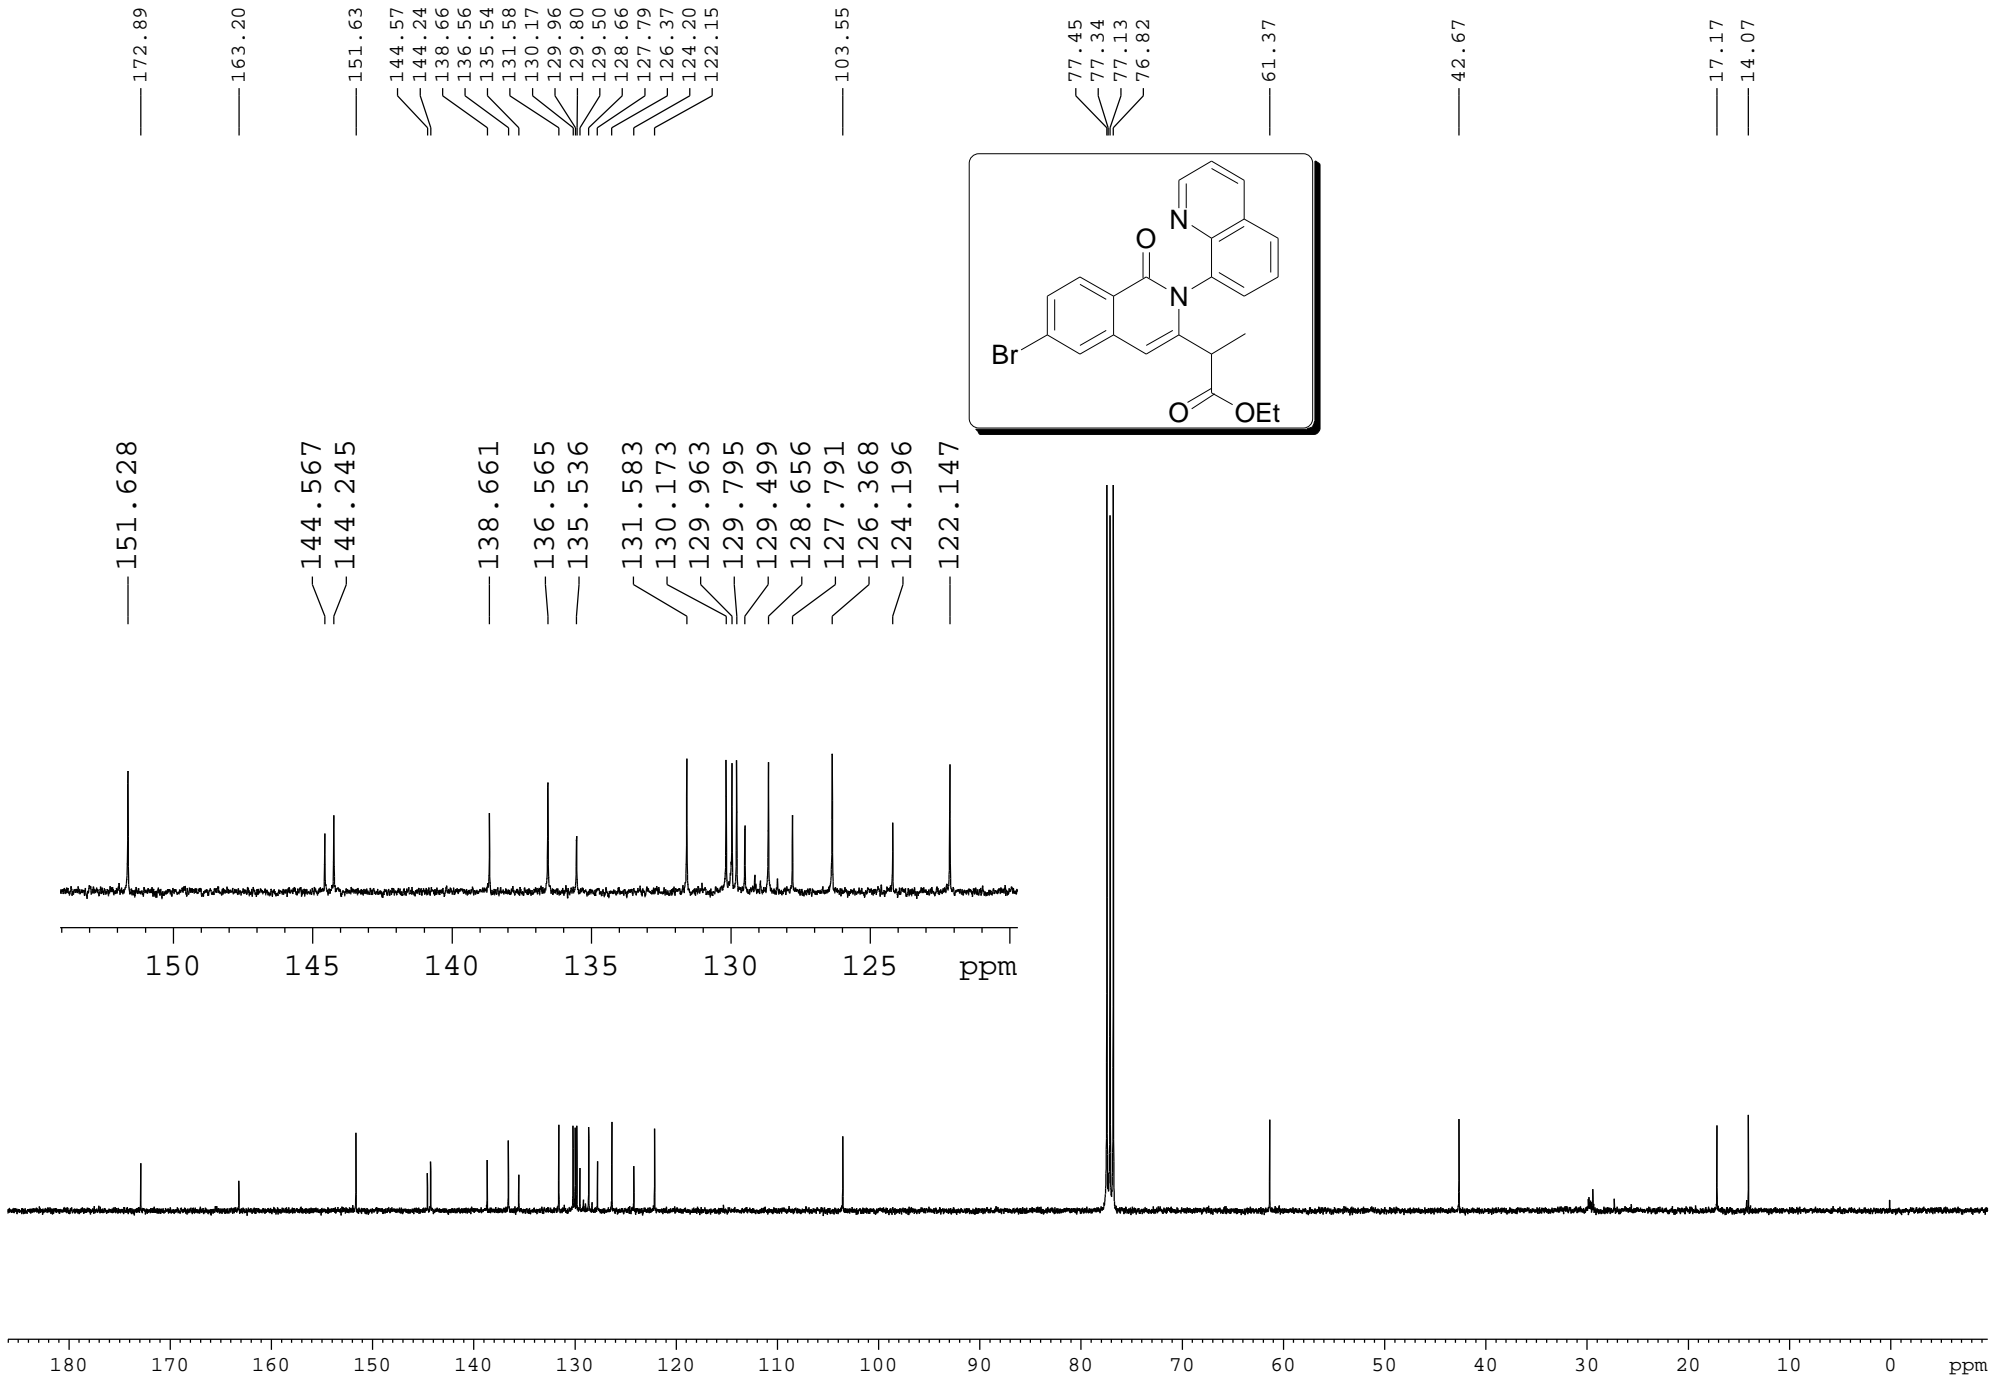

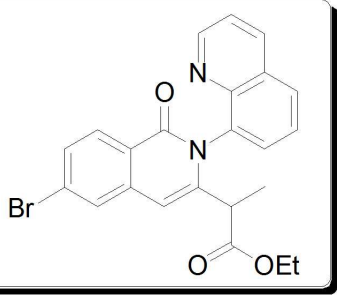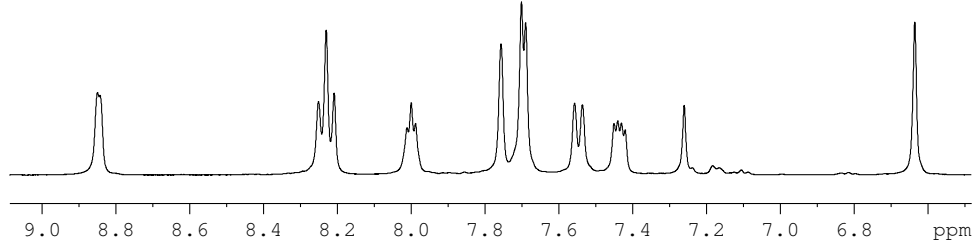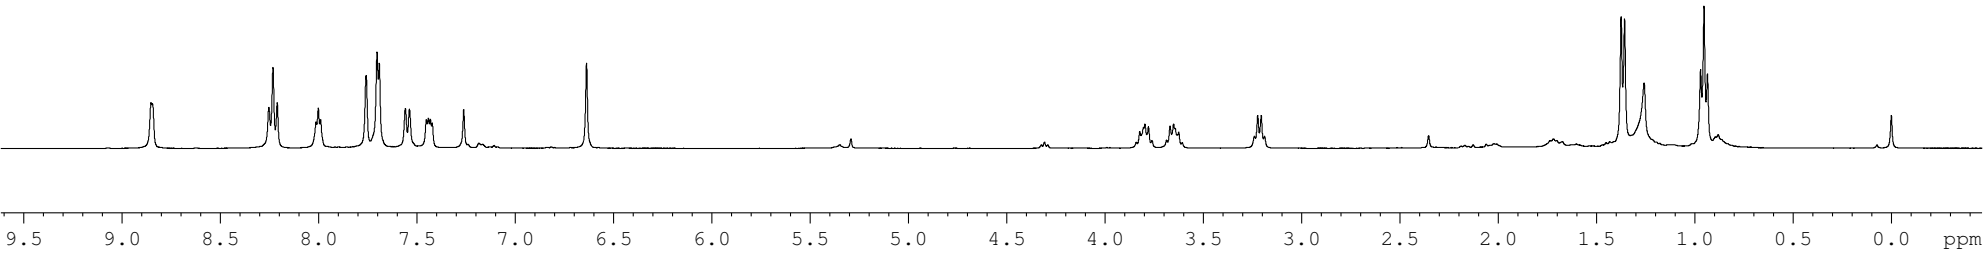

8.8506  
8.8439  
8.2515  
8.2308  
8.2093  
8.0120  
8.0004  
7.9887  
7.7570  
7.7015  
7.6902  
7.5575  
7.5364  
7.4509  
7.4407  
7.4306  
7.4206  
7.2606  
6.6356

3.8421  
3.8243  
3.8060  
3.7980  
3.7801  
3.7625  
3.6881  
3.6703  
3.6525  
3.6444  
3.6263  
3.6083  
3.2416  
3.2243  
3.2068  
3.1893

1.3758  
1.3583  
0.9716  
0.9541  
0.9365

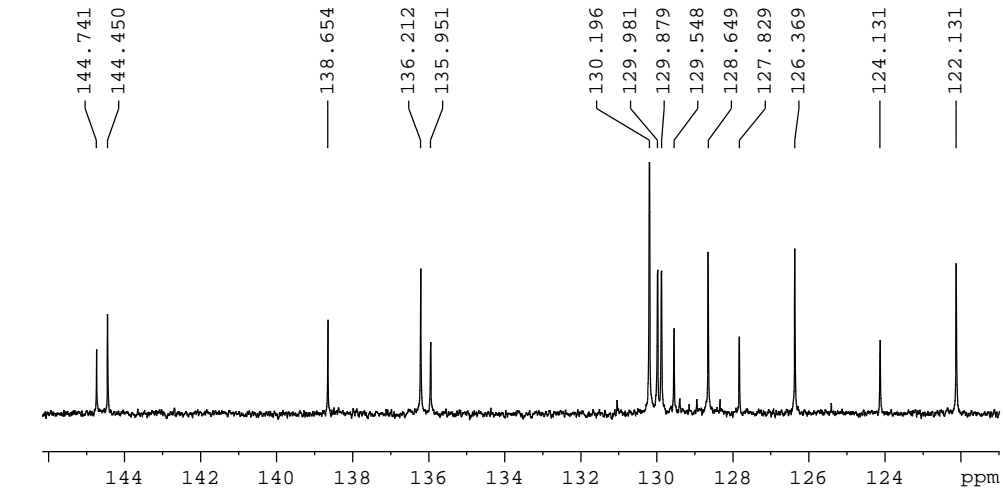

144.741  
144.450

138.654

136.212  
135.951

130.196  
129.981  
129.879  
129.548  
128.649  
127.829  
126.369

124.131

122.131

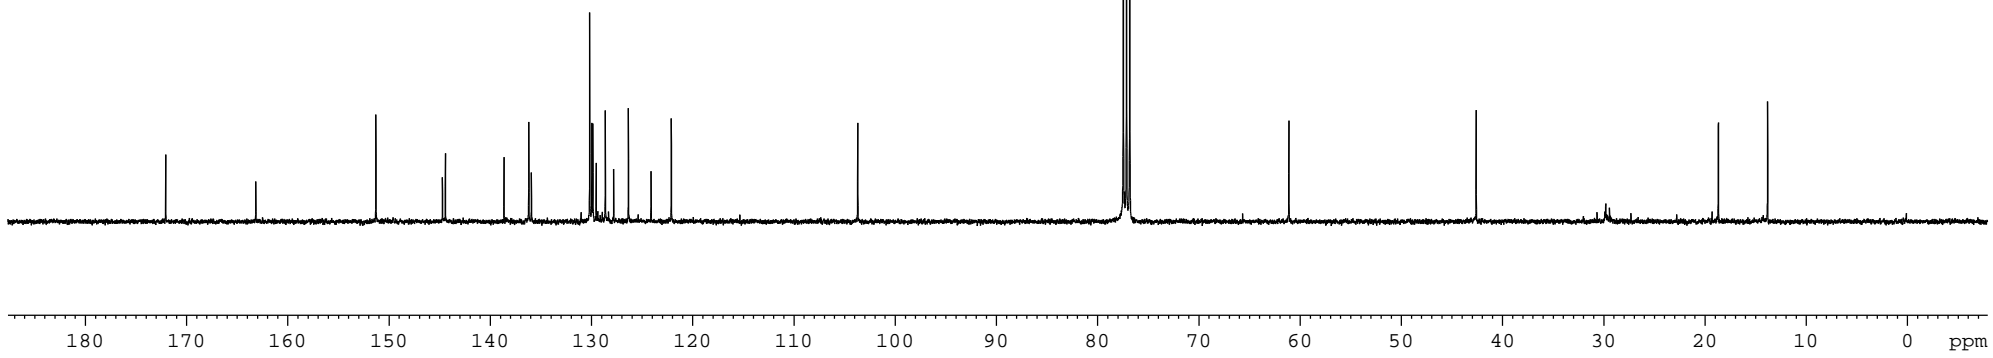

172.05

163.18

151.32

144.74  
144.45  
138.65  
136.21  
135.95  
130.20  
129.98  
129.88  
129.55  
128.65  
127.83  
126.37  
124.13  
122.13

103.71

77.47  
77.36  
77.15  
76.84

61.11

42.61

18.69

13.82

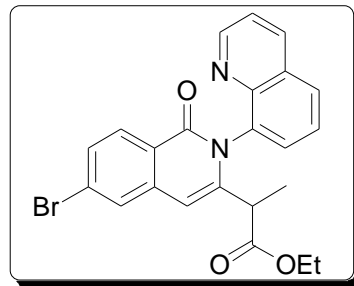

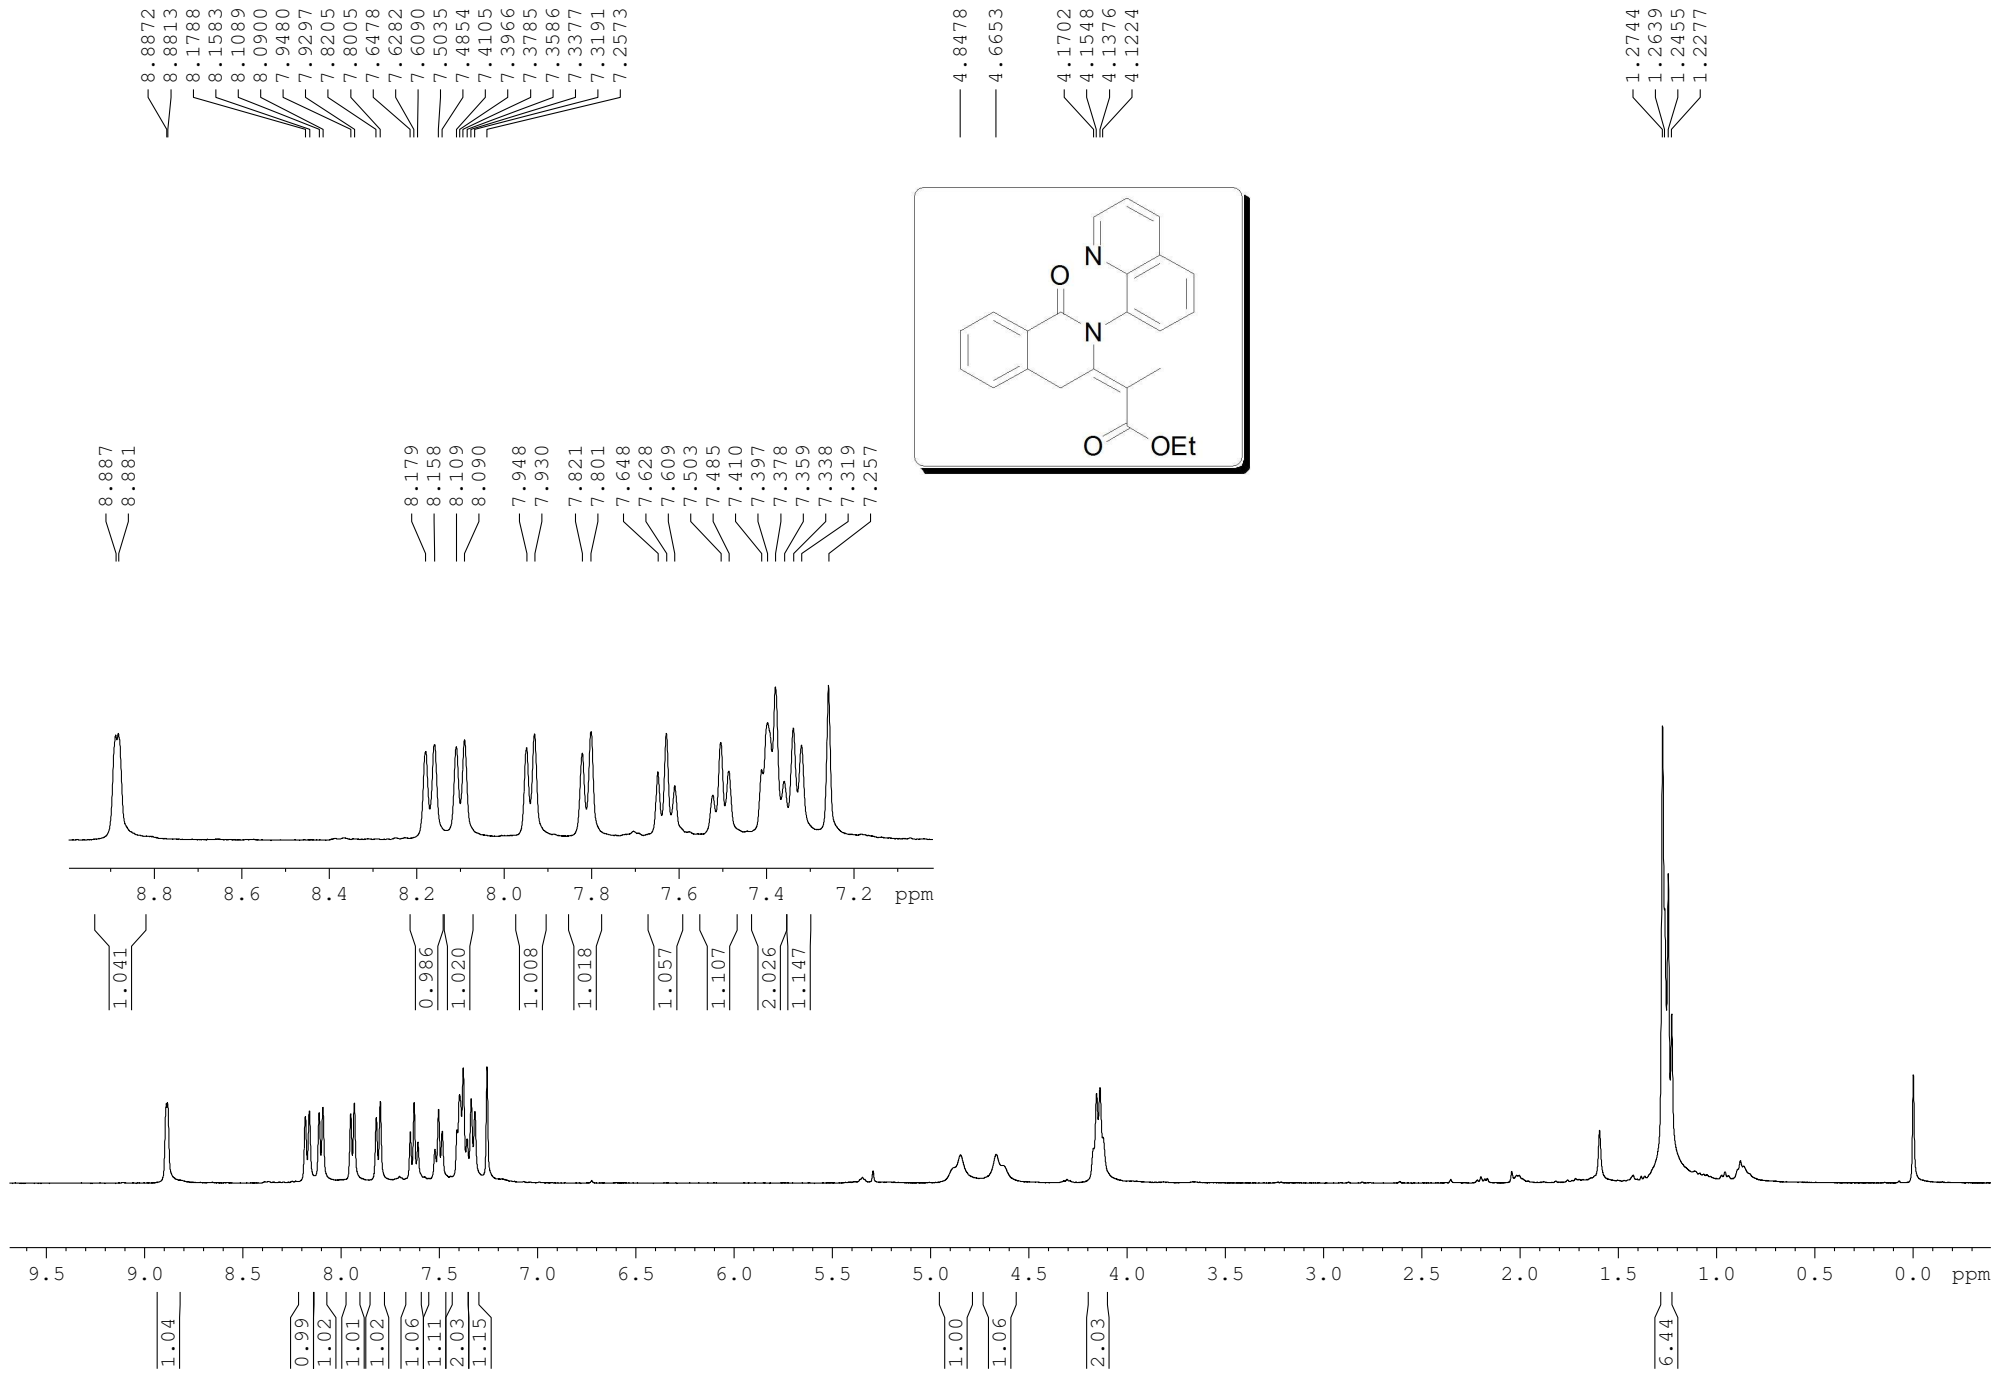

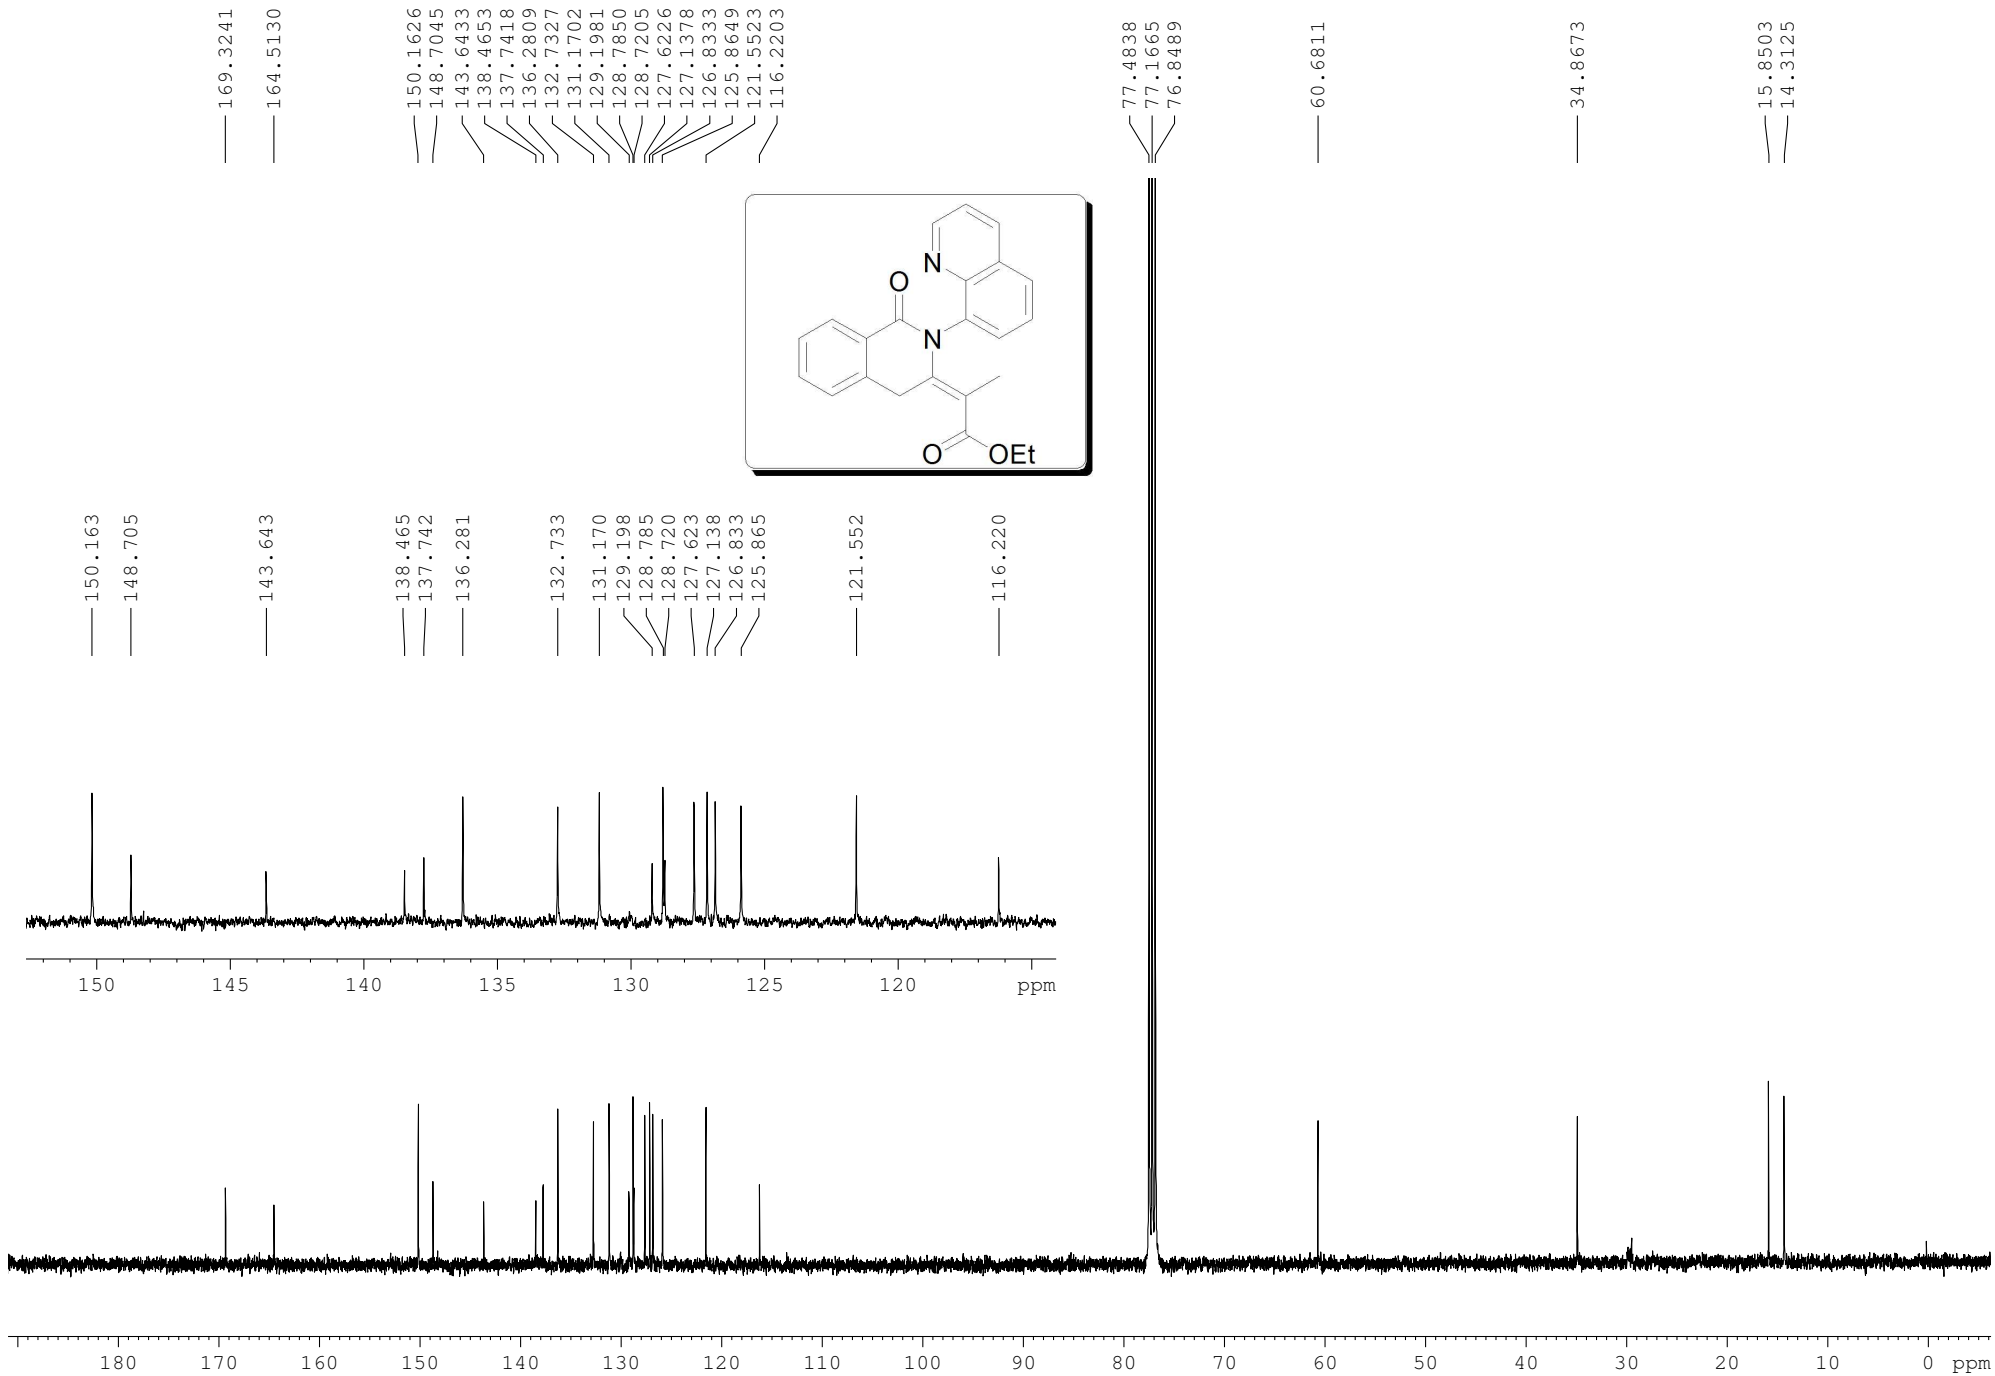



8.8836  
8.8795  
8.8734  
8.8693  
8.1835  
8.1796  
8.1628  
8.1589  
8.1257  
8.1113  
8.1046  
8.0903  
7.9505  
7.9478  
7.9319  
7.9292  
7.8256  
7.8233  
7.8052  
7.6497  
7.6304  
7.6106  
7.4142  
7.4038  
7.3935  
7.3832  
7.2582  
7.0782  
7.0723  
7.0568  
7.0509  
7.0420  
7.0364  
7.0298  
7.0203

4.8888  
4.8499  
4.6807  
4.6406  
4.1655  
4.1546  
4.1489  
4.1370  
4.1314  
4.1201  
4.1094

1.2828  
1.2597  
1.2419  
1.2241

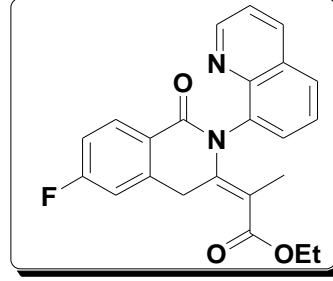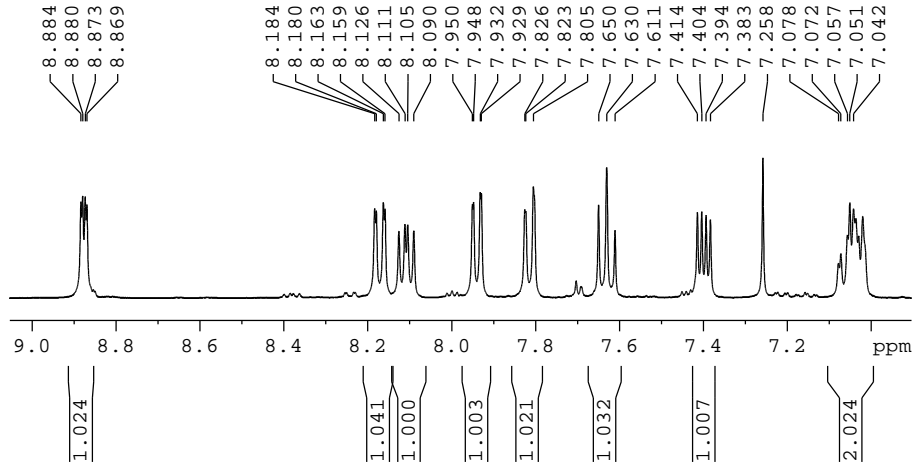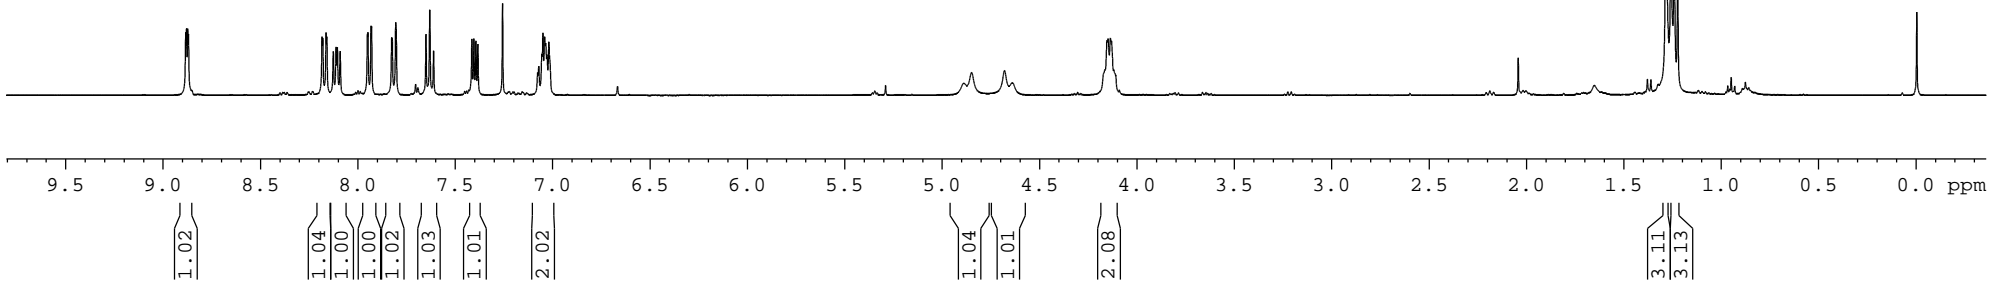

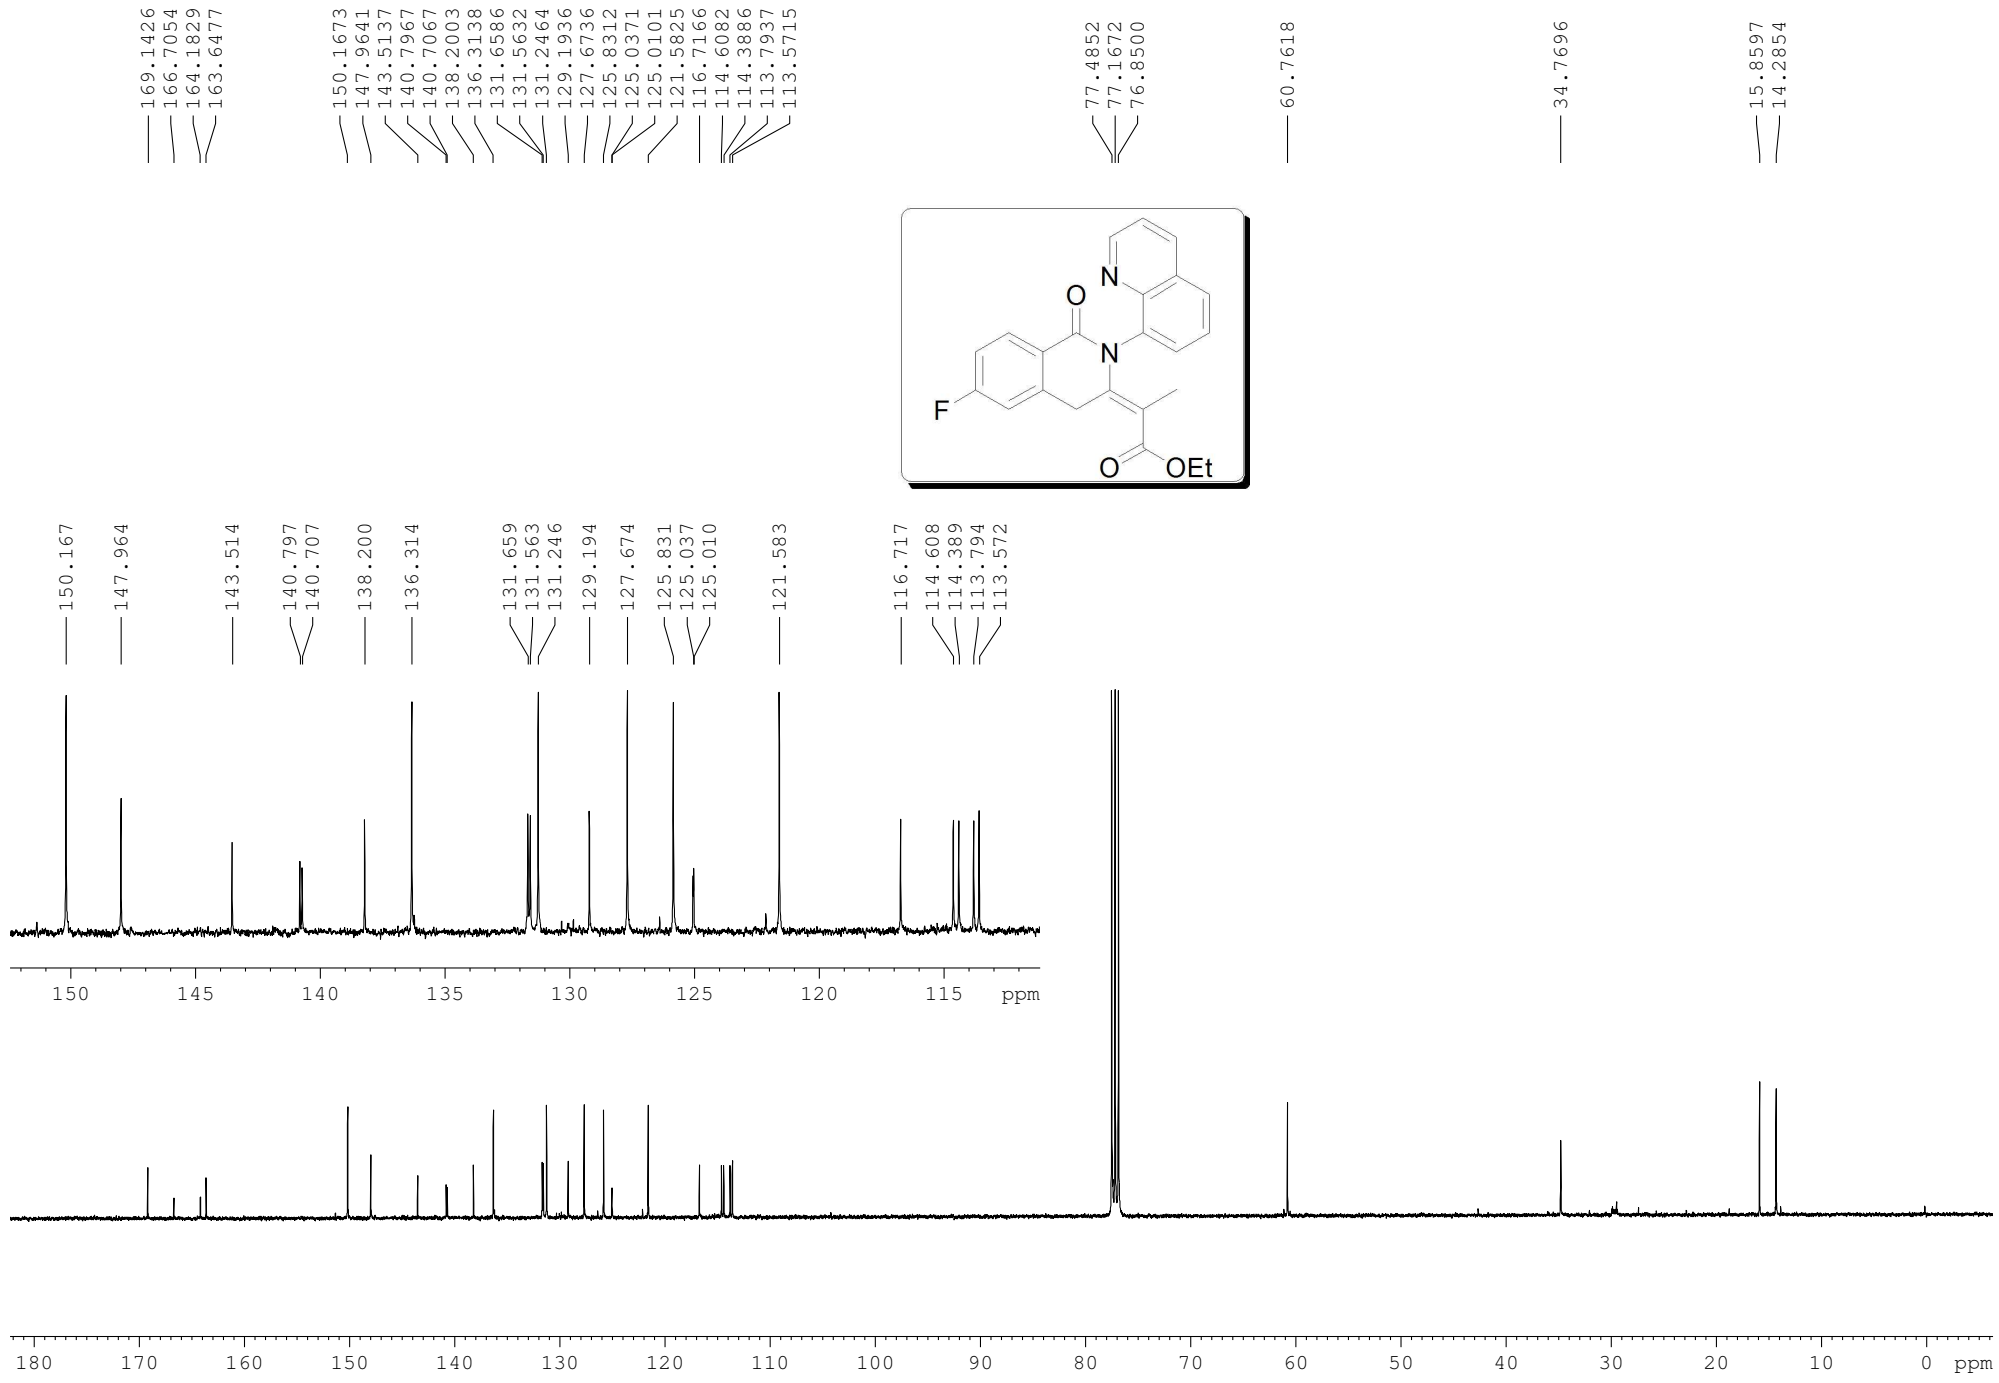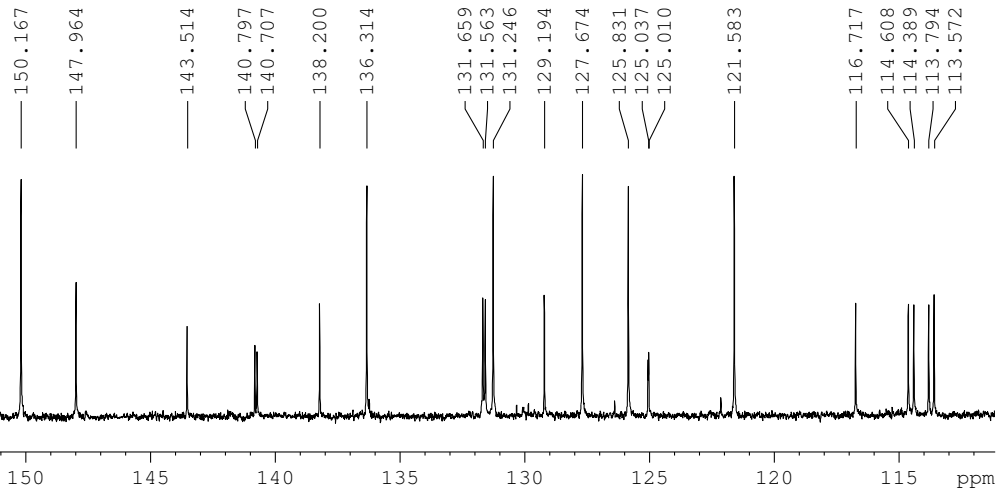

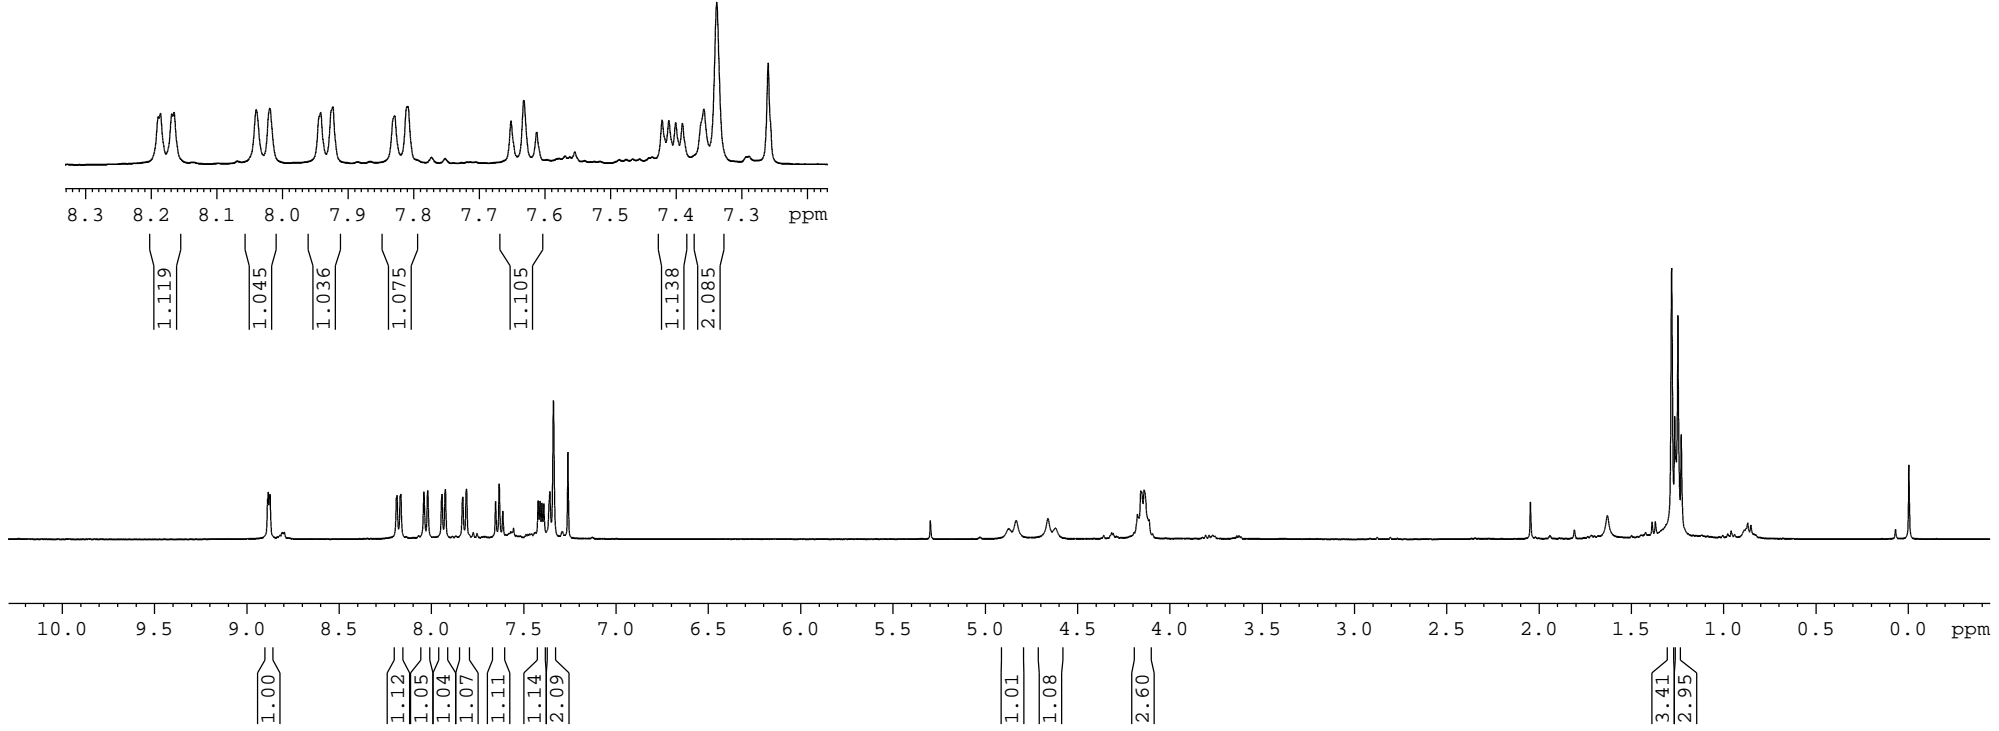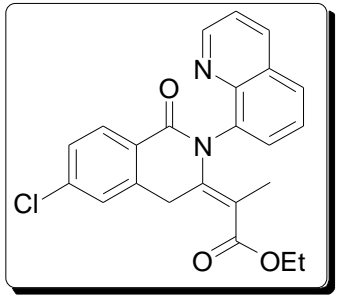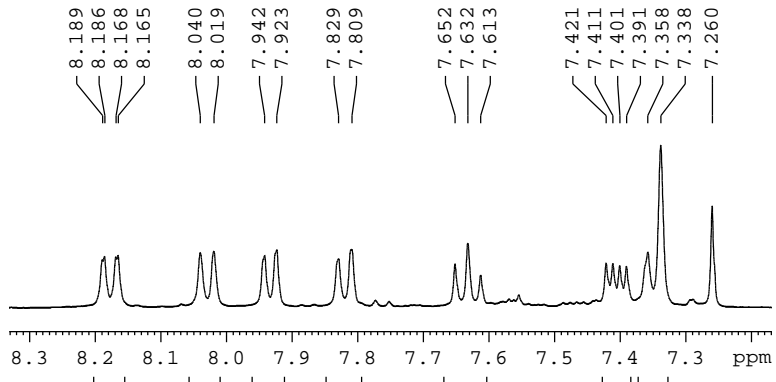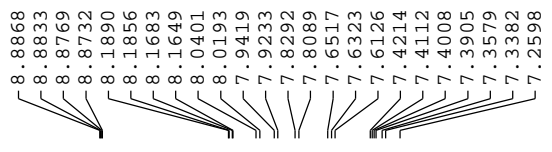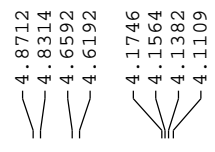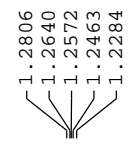

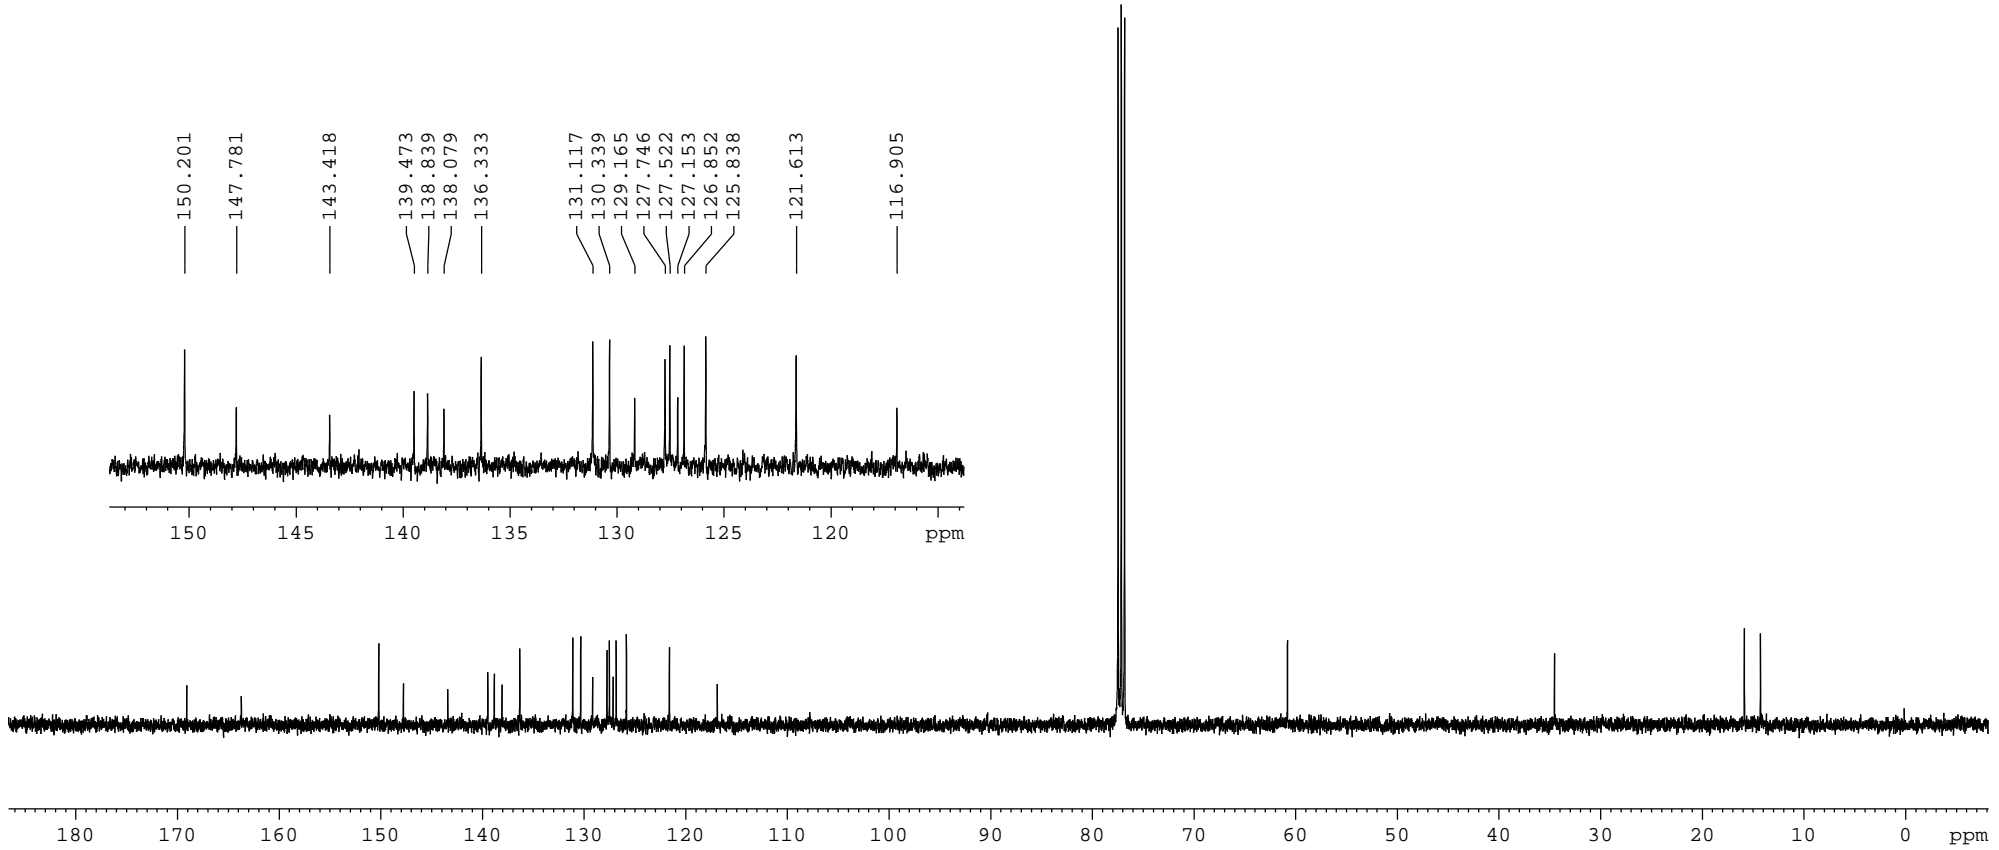

150.201  
 147.781  
 143.418  
 139.473  
 138.839  
 138.079  
 136.333  
 131.117  
 130.339  
 129.165  
 127.746  
 127.522  
 127.153  
 126.852  
 125.838  
 121.613  
 116.905

169.09  
 163.72  
 150.20  
 147.78  
 143.42  
 139.47  
 138.84  
 138.08  
 136.33  
 131.12  
 130.34  
 129.16  
 127.75  
 127.52  
 127.15  
 126.85  
 125.84  
 121.61  
 116.91

77.47  
 77.15  
 76.84

60.81

34.54

15.85  
 14.28

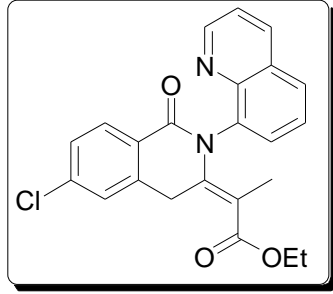

8.8804  
8.8752

8.2018  
8.1818  
7.9501  
7.9318  
7.8523  
7.8322  
7.6745  
7.6533  
7.6253  
7.4355  
7.4253  
7.4150  
7.4051  
7.2596

4.9195  
4.8834  
4.7415  
4.7035

4.1633  
4.1463  
4.1278  
4.1095

1.2657  
1.2487  
1.2308

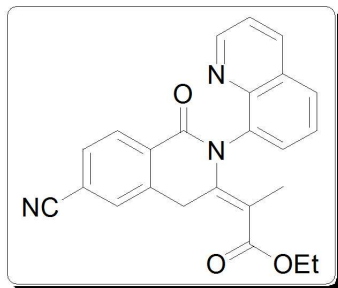

8.202  
8.182

7.950  
7.932

7.852  
7.832

7.675  
7.653  
7.625

7.436  
7.425  
7.415  
7.405

7.260

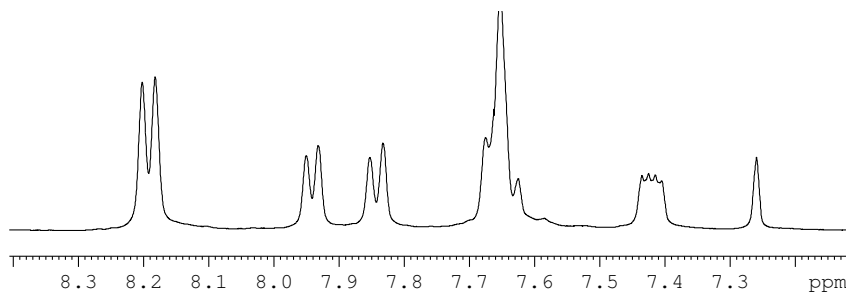

2.045

1.038

1.083

3.072

1.080

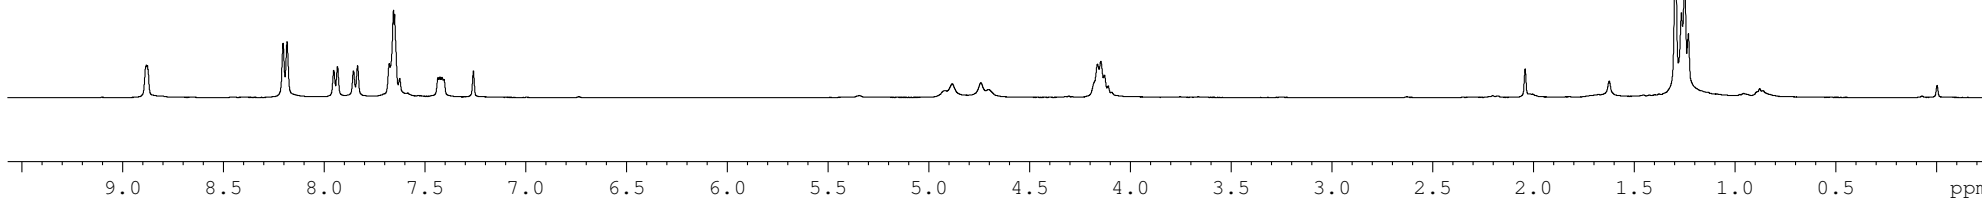

1.00

2.04

1.04

1.08

3.07

1.08

1.02

1.05

2.12

6.10

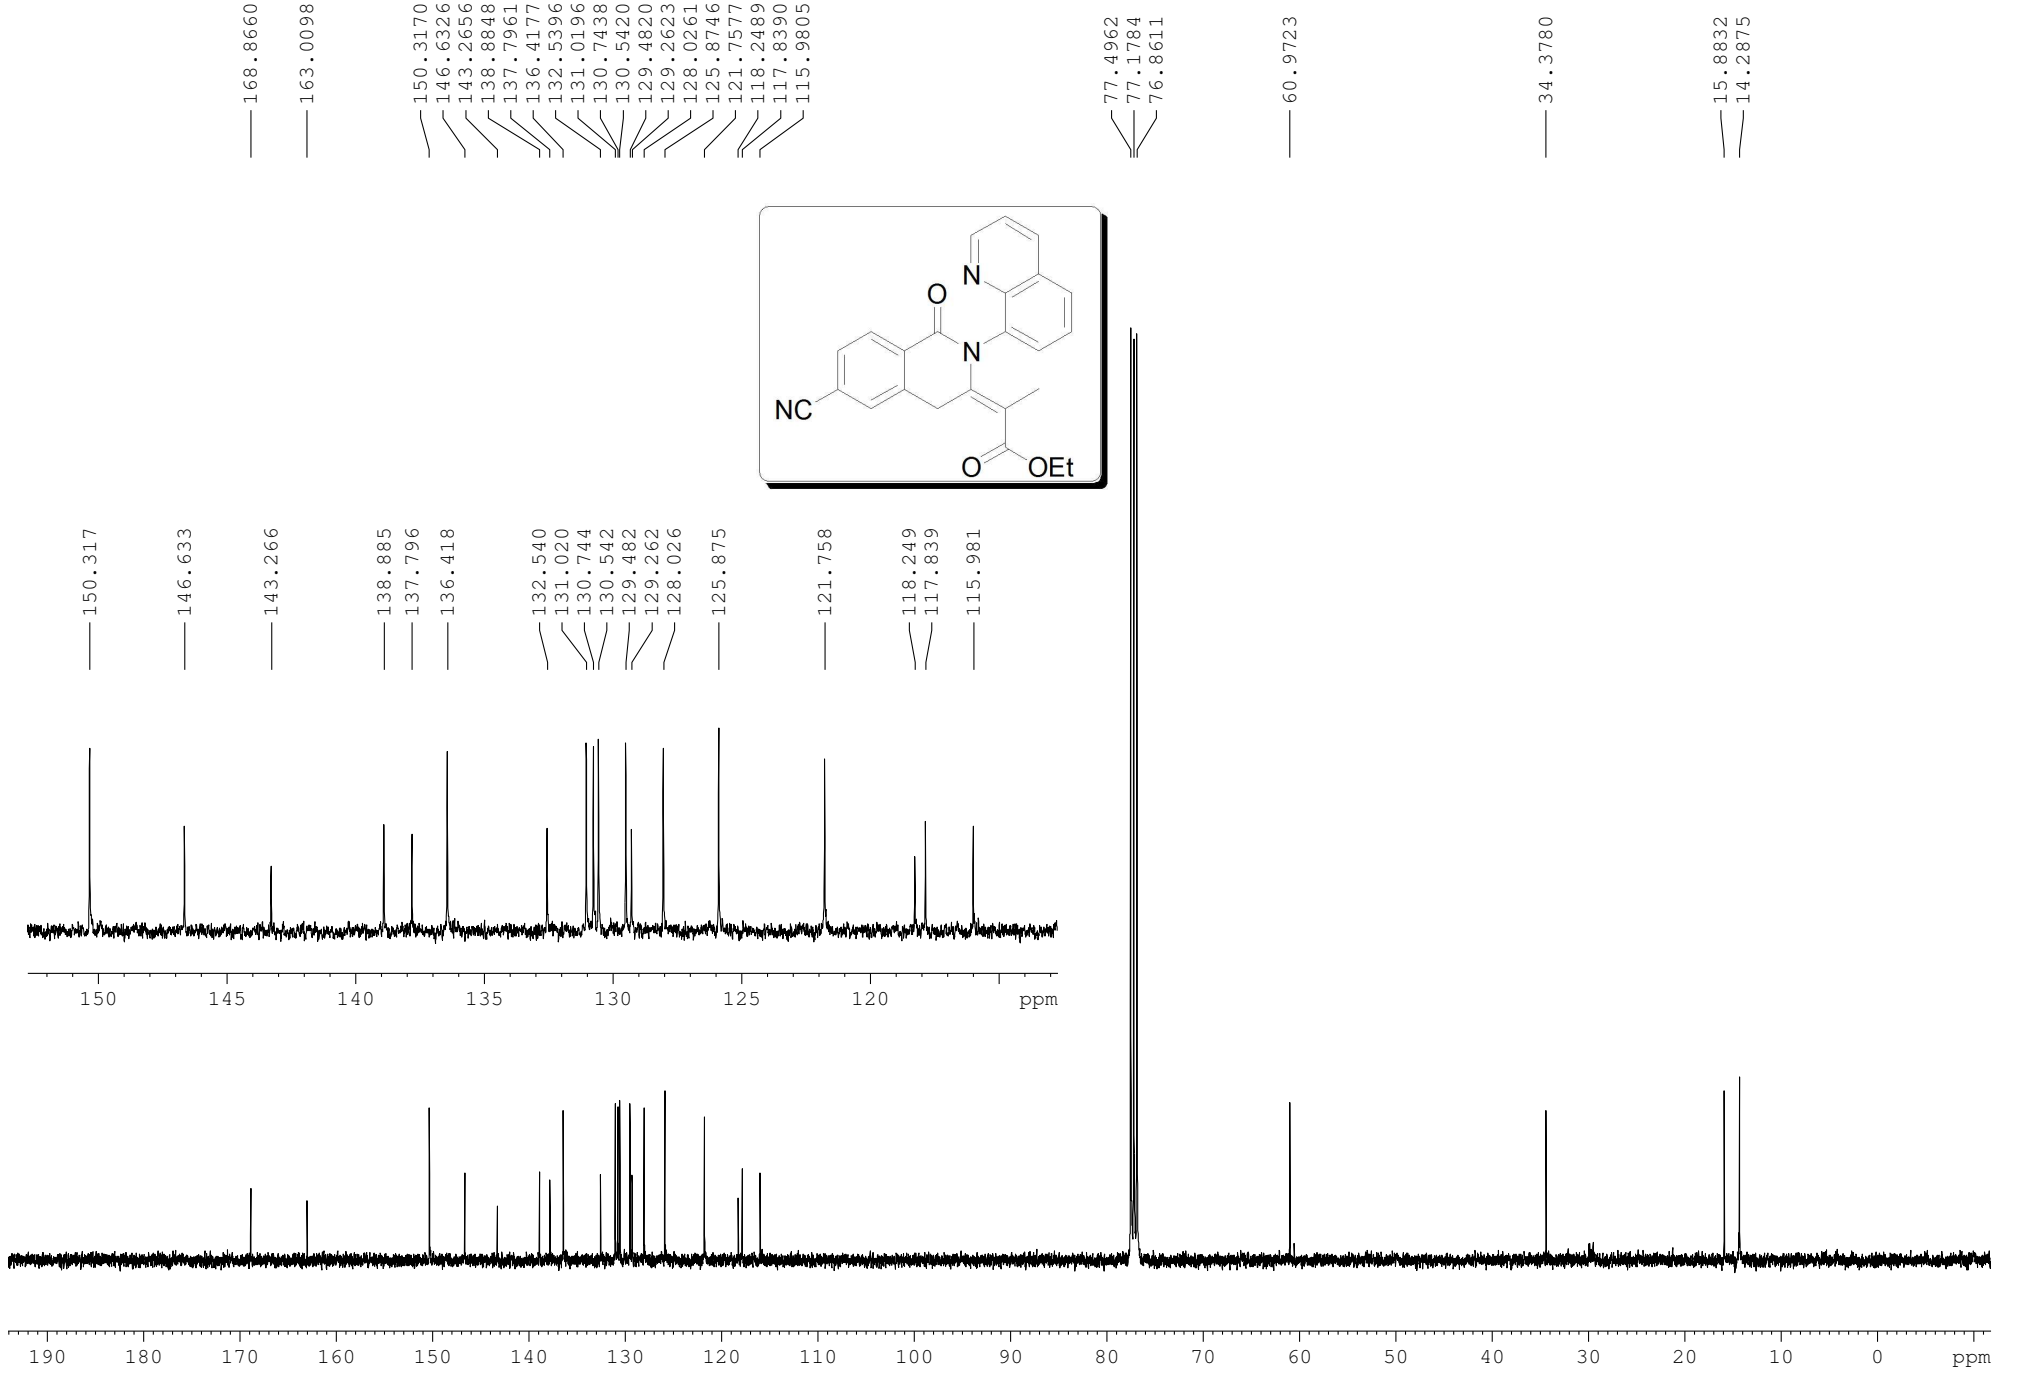

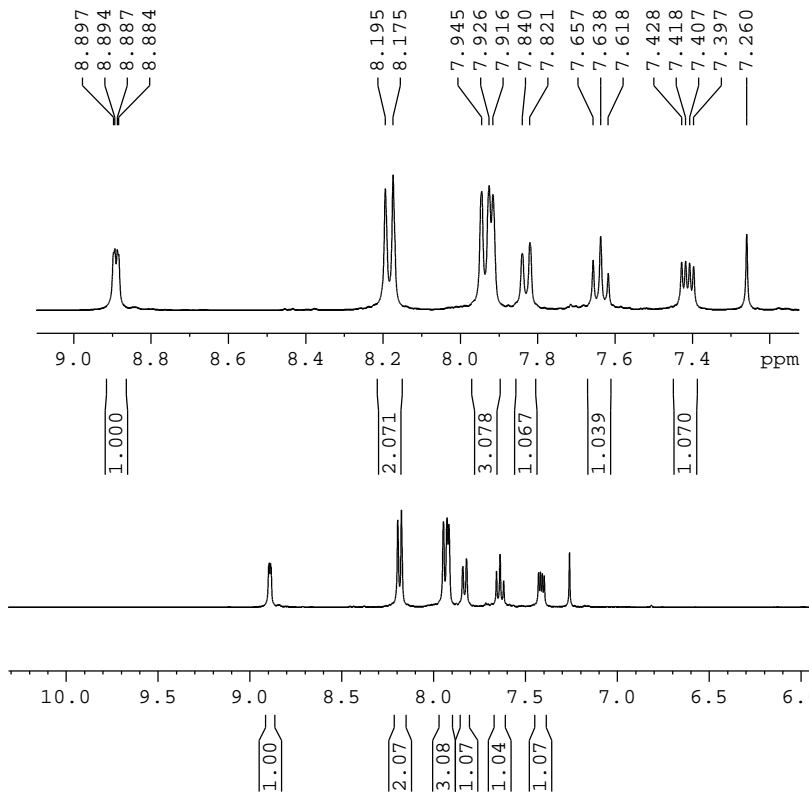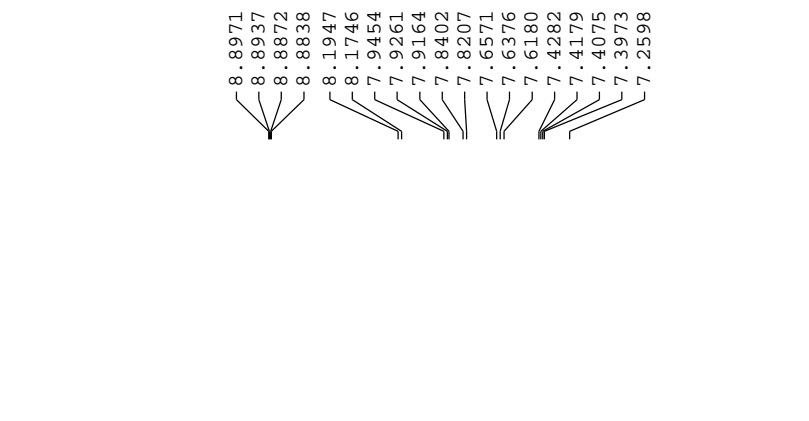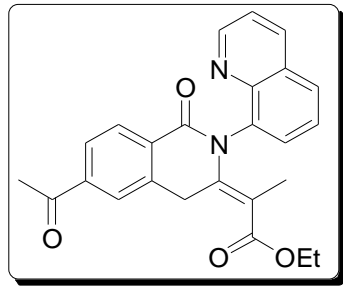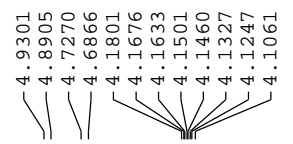

— 2.6608

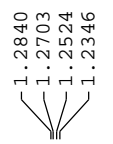

— 0.0061

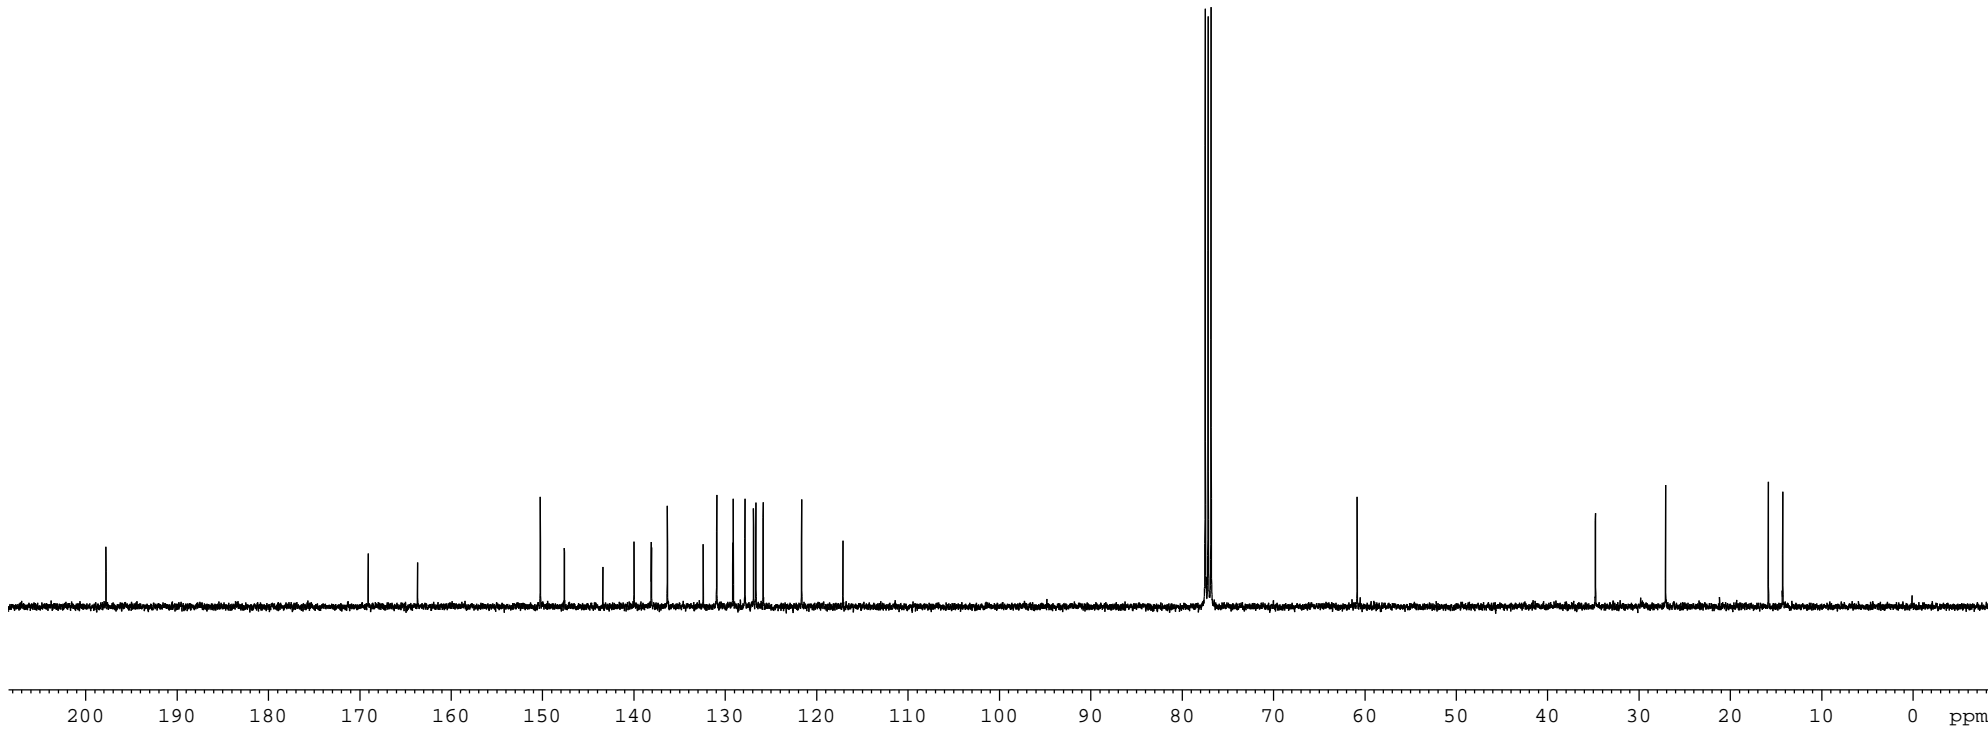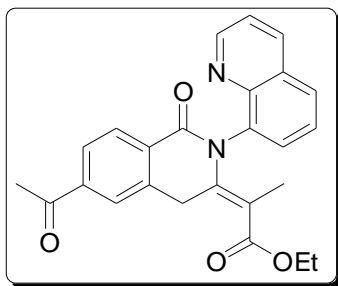

— 197.79

— 169.09

— 163.68

— 150.25

— 147.62

— 143.40

— 140.00

— 138.11

— 138.08

— 136.35

— 132.42

— 130.94

— 129.19

— 129.14

— 127.86

— 126.92

— 126.66

— 125.86

— 121.65

— 117.13

— 77.48

— 77.16

— 76.84

— 60.85

— 34.77

— 27.09

— 15.85

— 14.28



8.8754  
8.8699  
8.1751  
8.1547  
7.9321  
7.9139  
7.8189  
7.7988  
7.6350  
7.6156  
7.5962  
7.4504  
7.4366  
7.4077  
7.3978  
7.3874  
7.3773  
7.2545  
7.1329  
7.1142  
7.0791  
7.0553  
7.0321

5.2886  
4.9098  
4.8715  
4.6993  
4.6603  
4.1433  
4.1279

1.2947  
1.2527  
1.2349  
1.2172

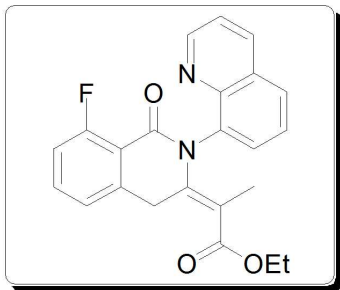

8.175  
8.155  
7.932  
7.914  
7.819  
7.799  
7.635  
7.616  
7.596  
7.450  
7.437  
7.408  
7.398  
7.387  
7.377  
7.255  
7.133  
7.114  
7.079  
7.055  
7.032

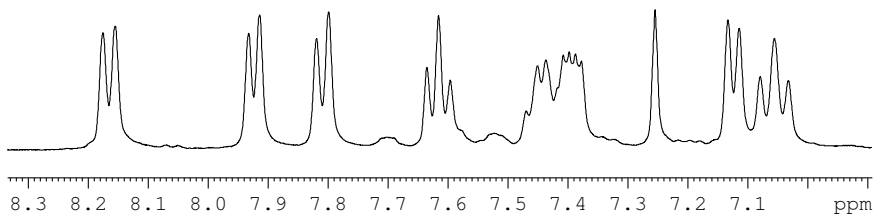

1.000  
1.003  
1.003  
1.075  
2.122  
1.011  
1.094

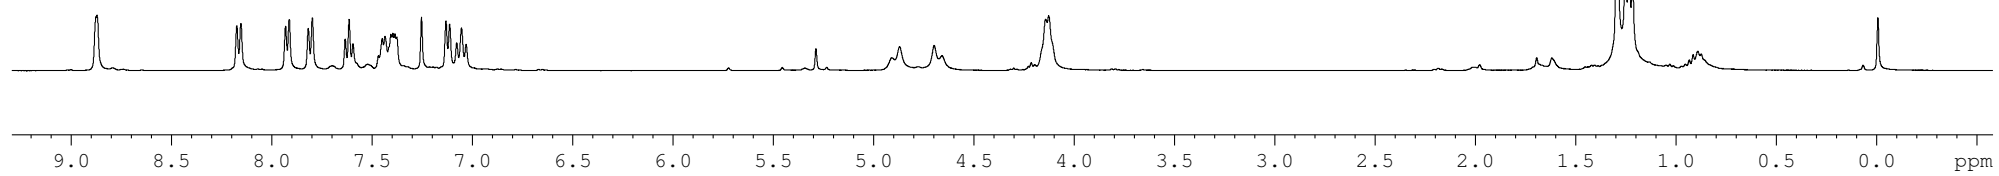

1.00  
1.00  
1.00  
1.00  
1.08  
2.12  
1.01  
1.09  
1.00  
1.06  
2.10  
6.20

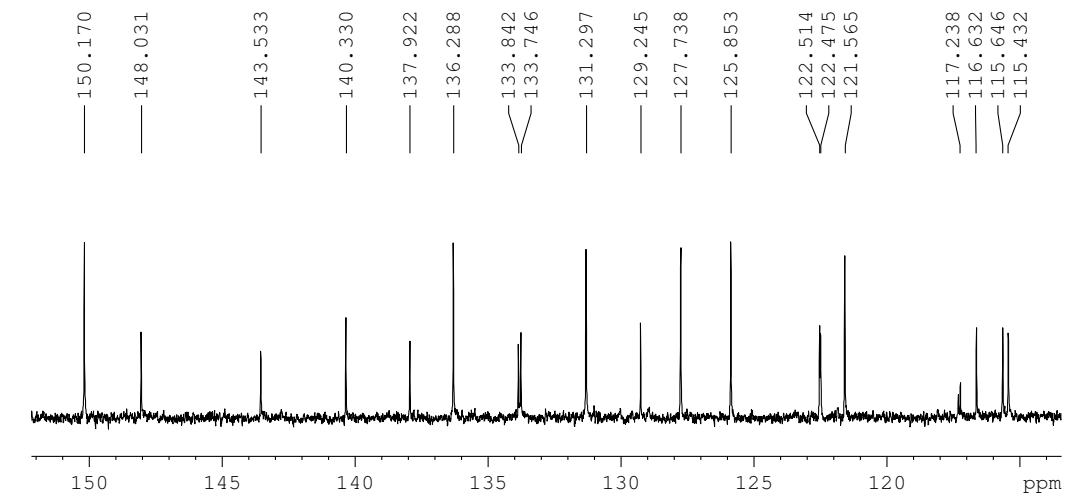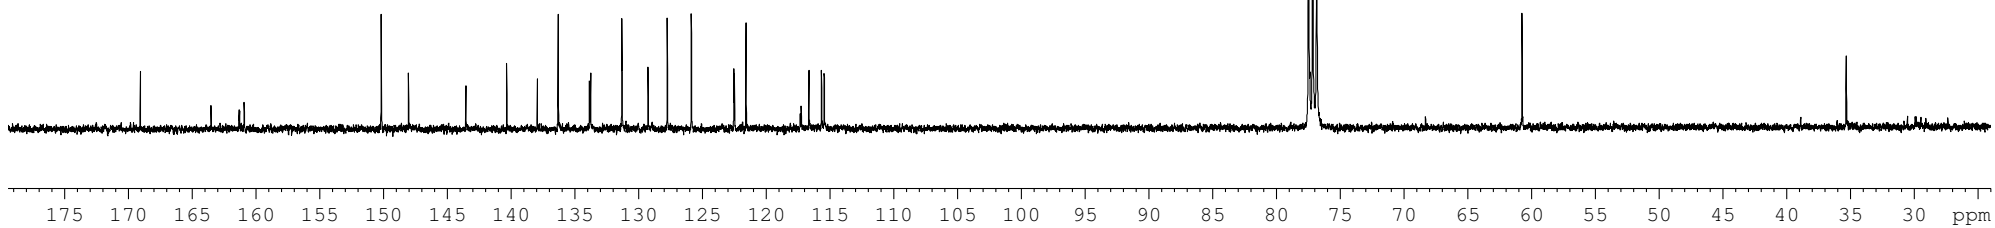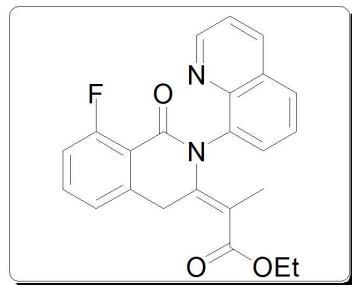

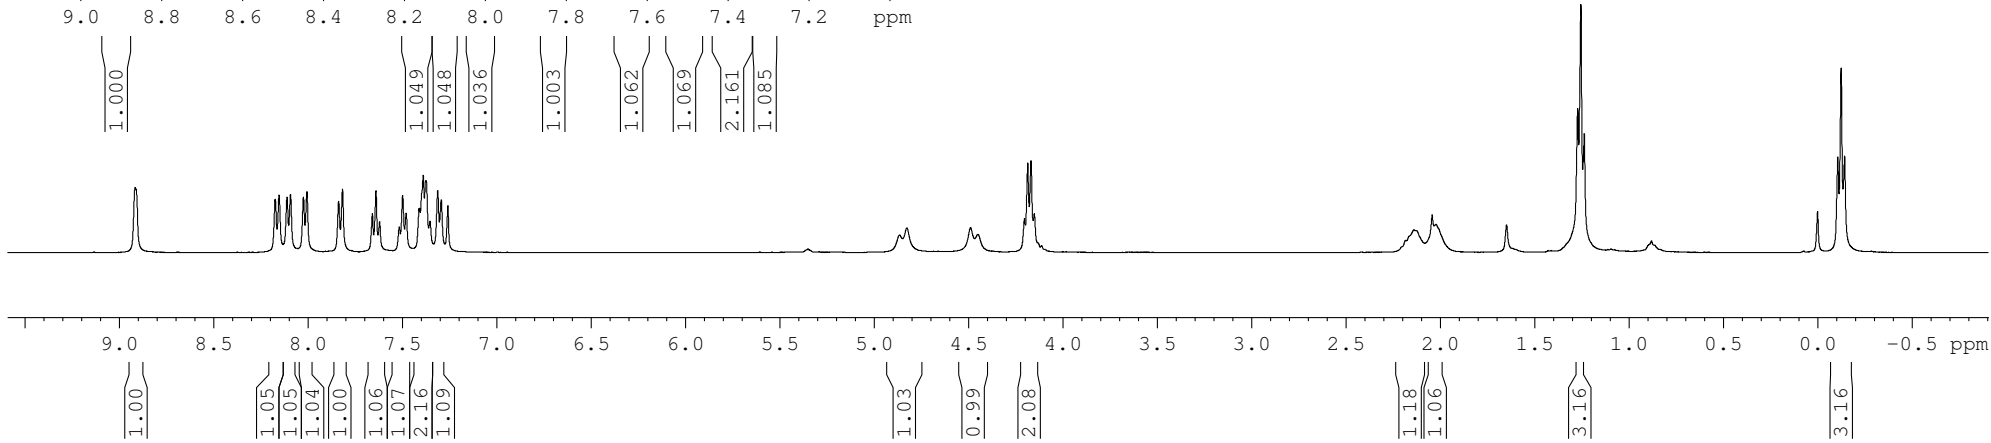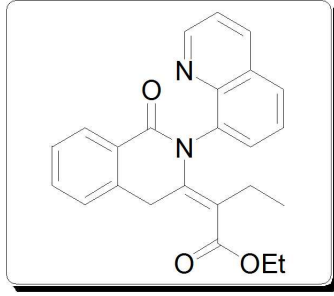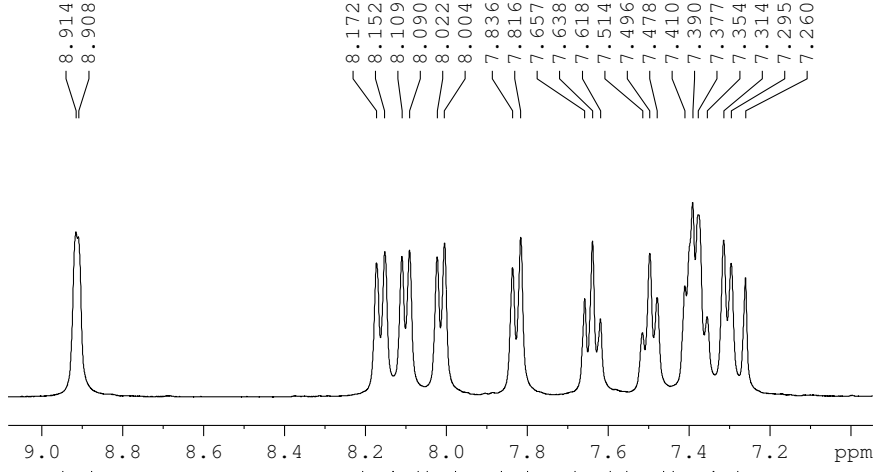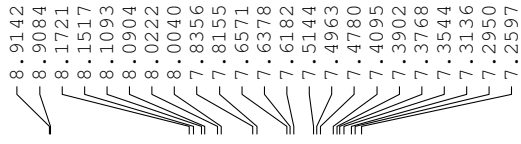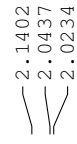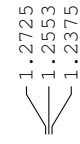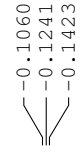

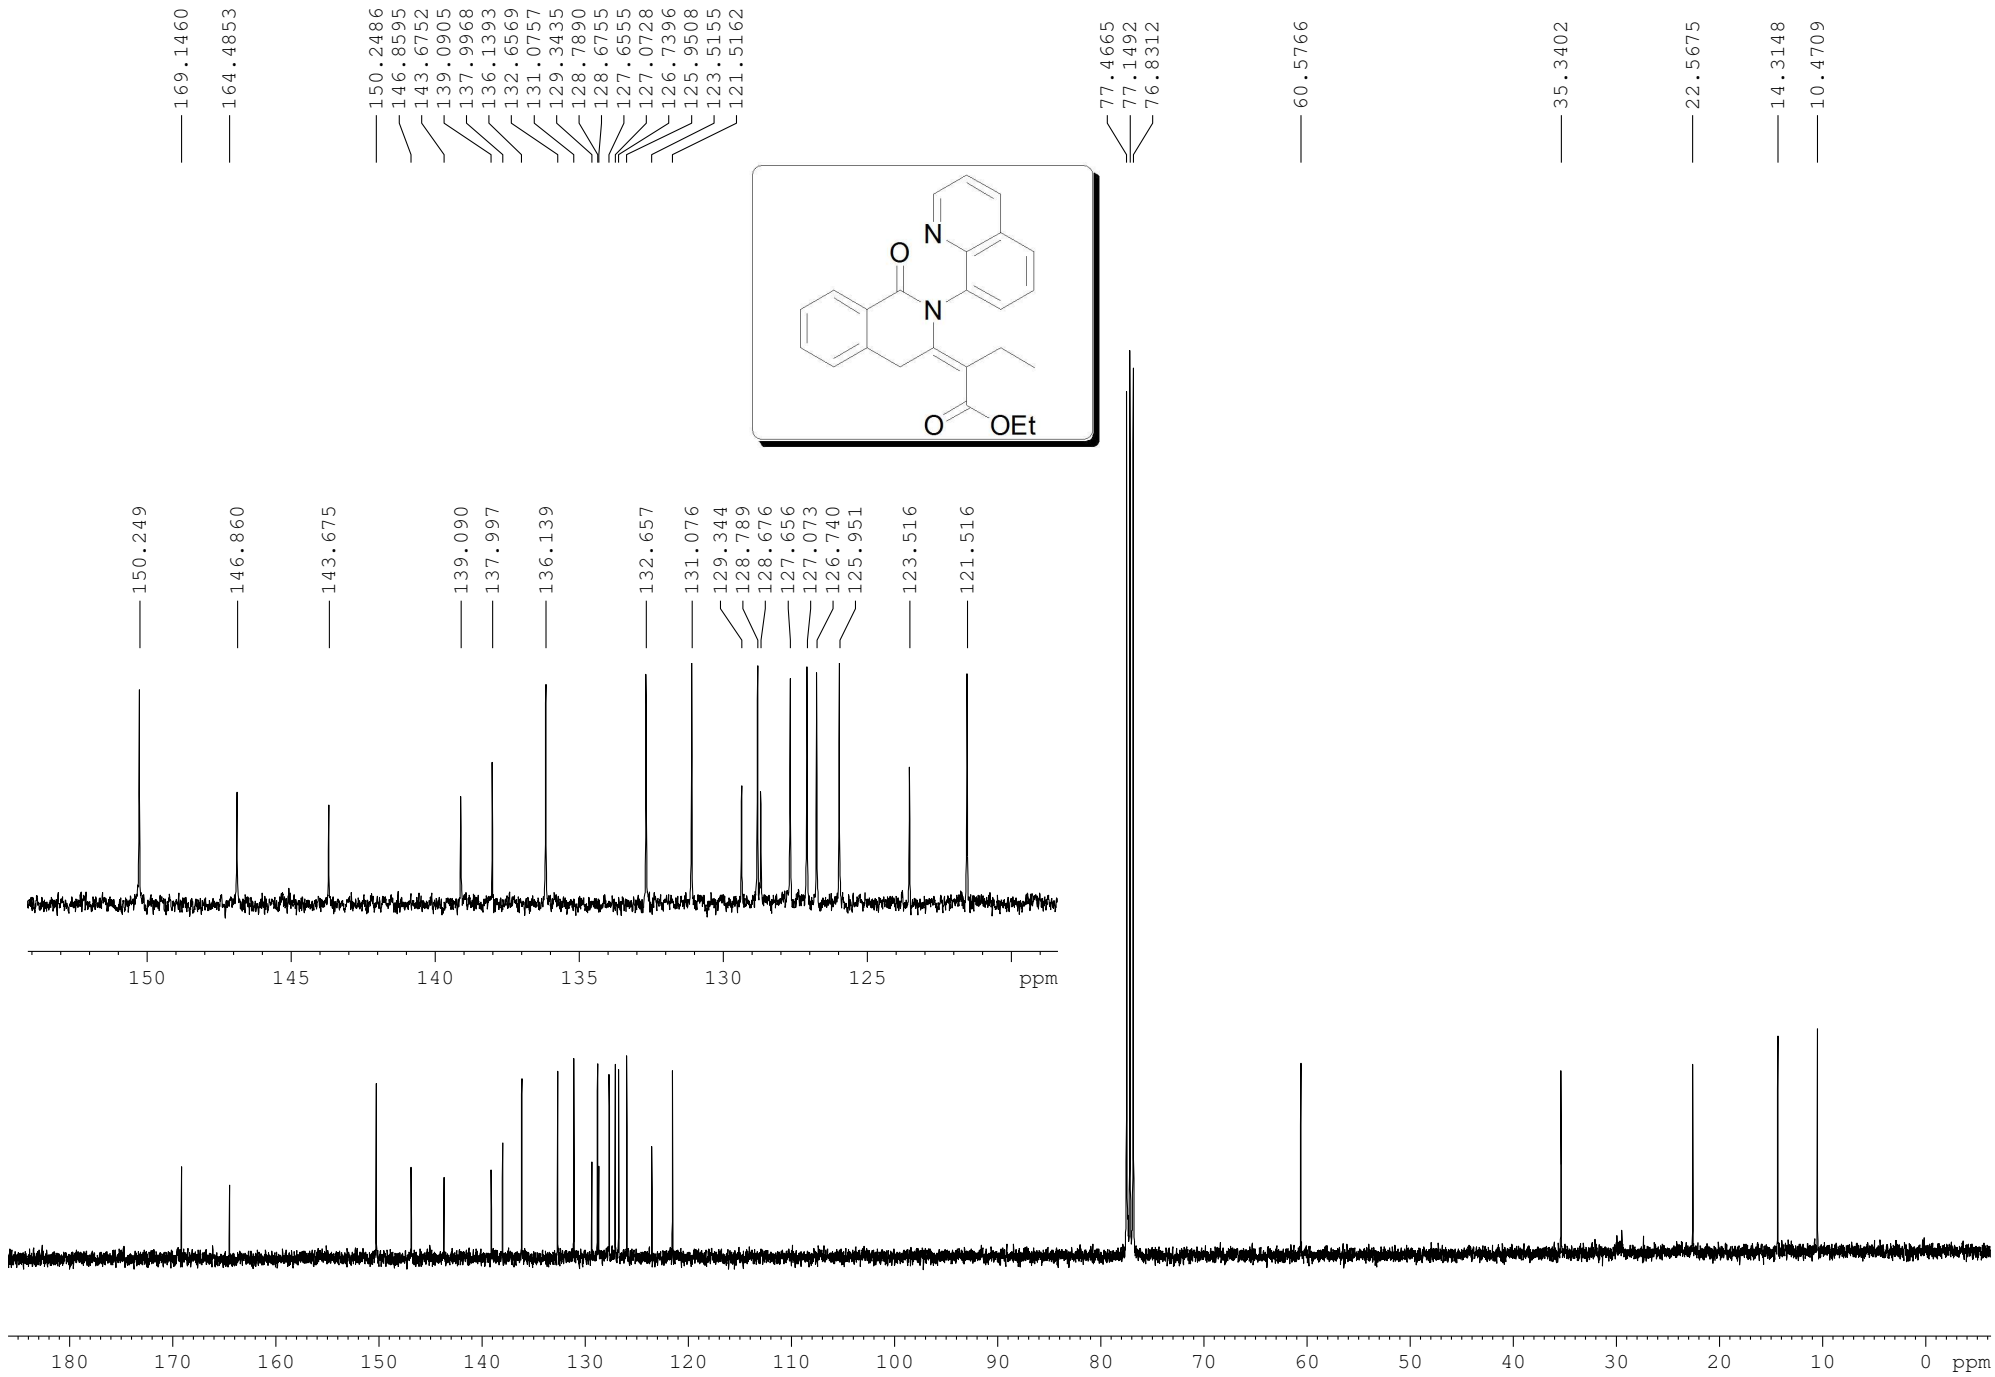

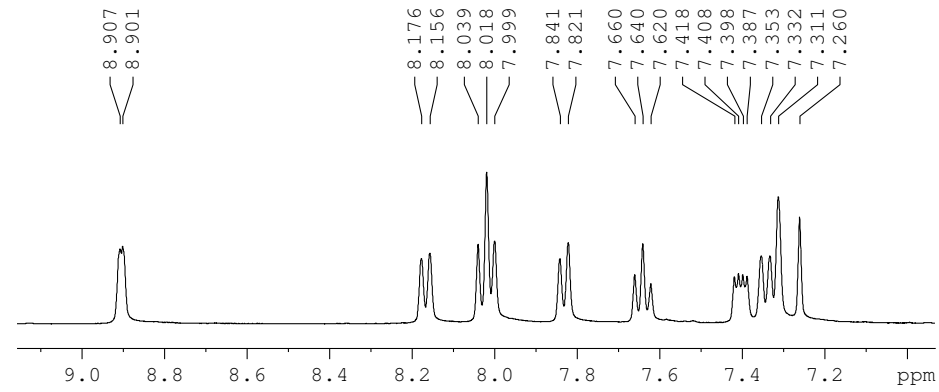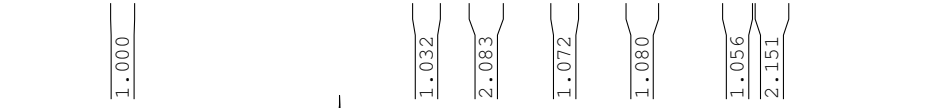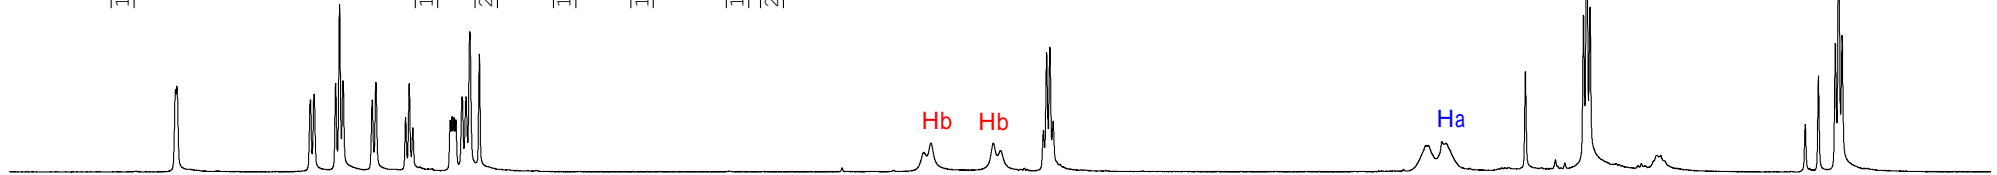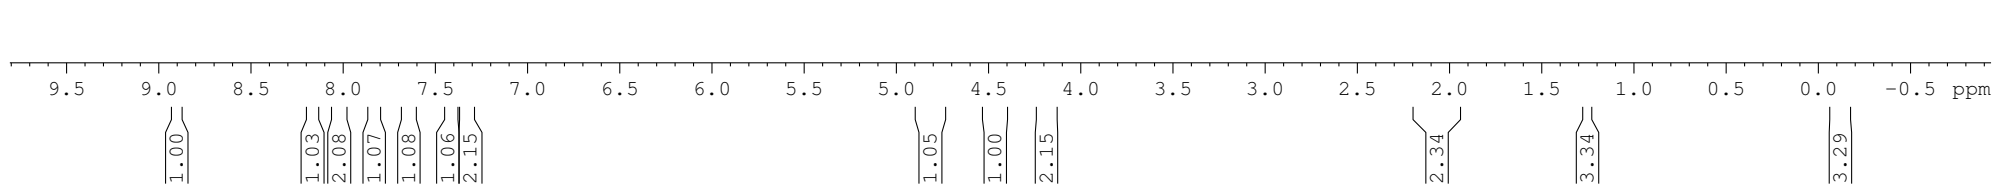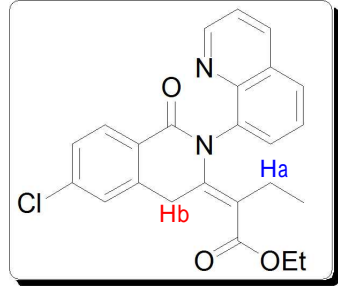

- 8.9068
- 8.9007
- 8.1761
- 8.1560
- 8.0390
- 8.0182
- 7.9989
- 7.8408
- 7.8206
- 7.6595
- 7.6399
- 7.6205
- 7.4180
- 7.4079
- 7.3975
- 7.3873
- 7.3527
- 7.3316
- 7.3114
- 7.2599

- 4.8526
- 4.8129
- 4.4757
- 4.4370
- 4.2036
- 4.1861
- 4.1684
- 4.1508

- 2.1300
- 2.1151
- 2.0428
- 2.0185
- 1.5894
- 1.2745
- 1.2568
- 1.2391

- 0.0719
- 0.0003
- 0.0915
- 0.1098
- 0.1281

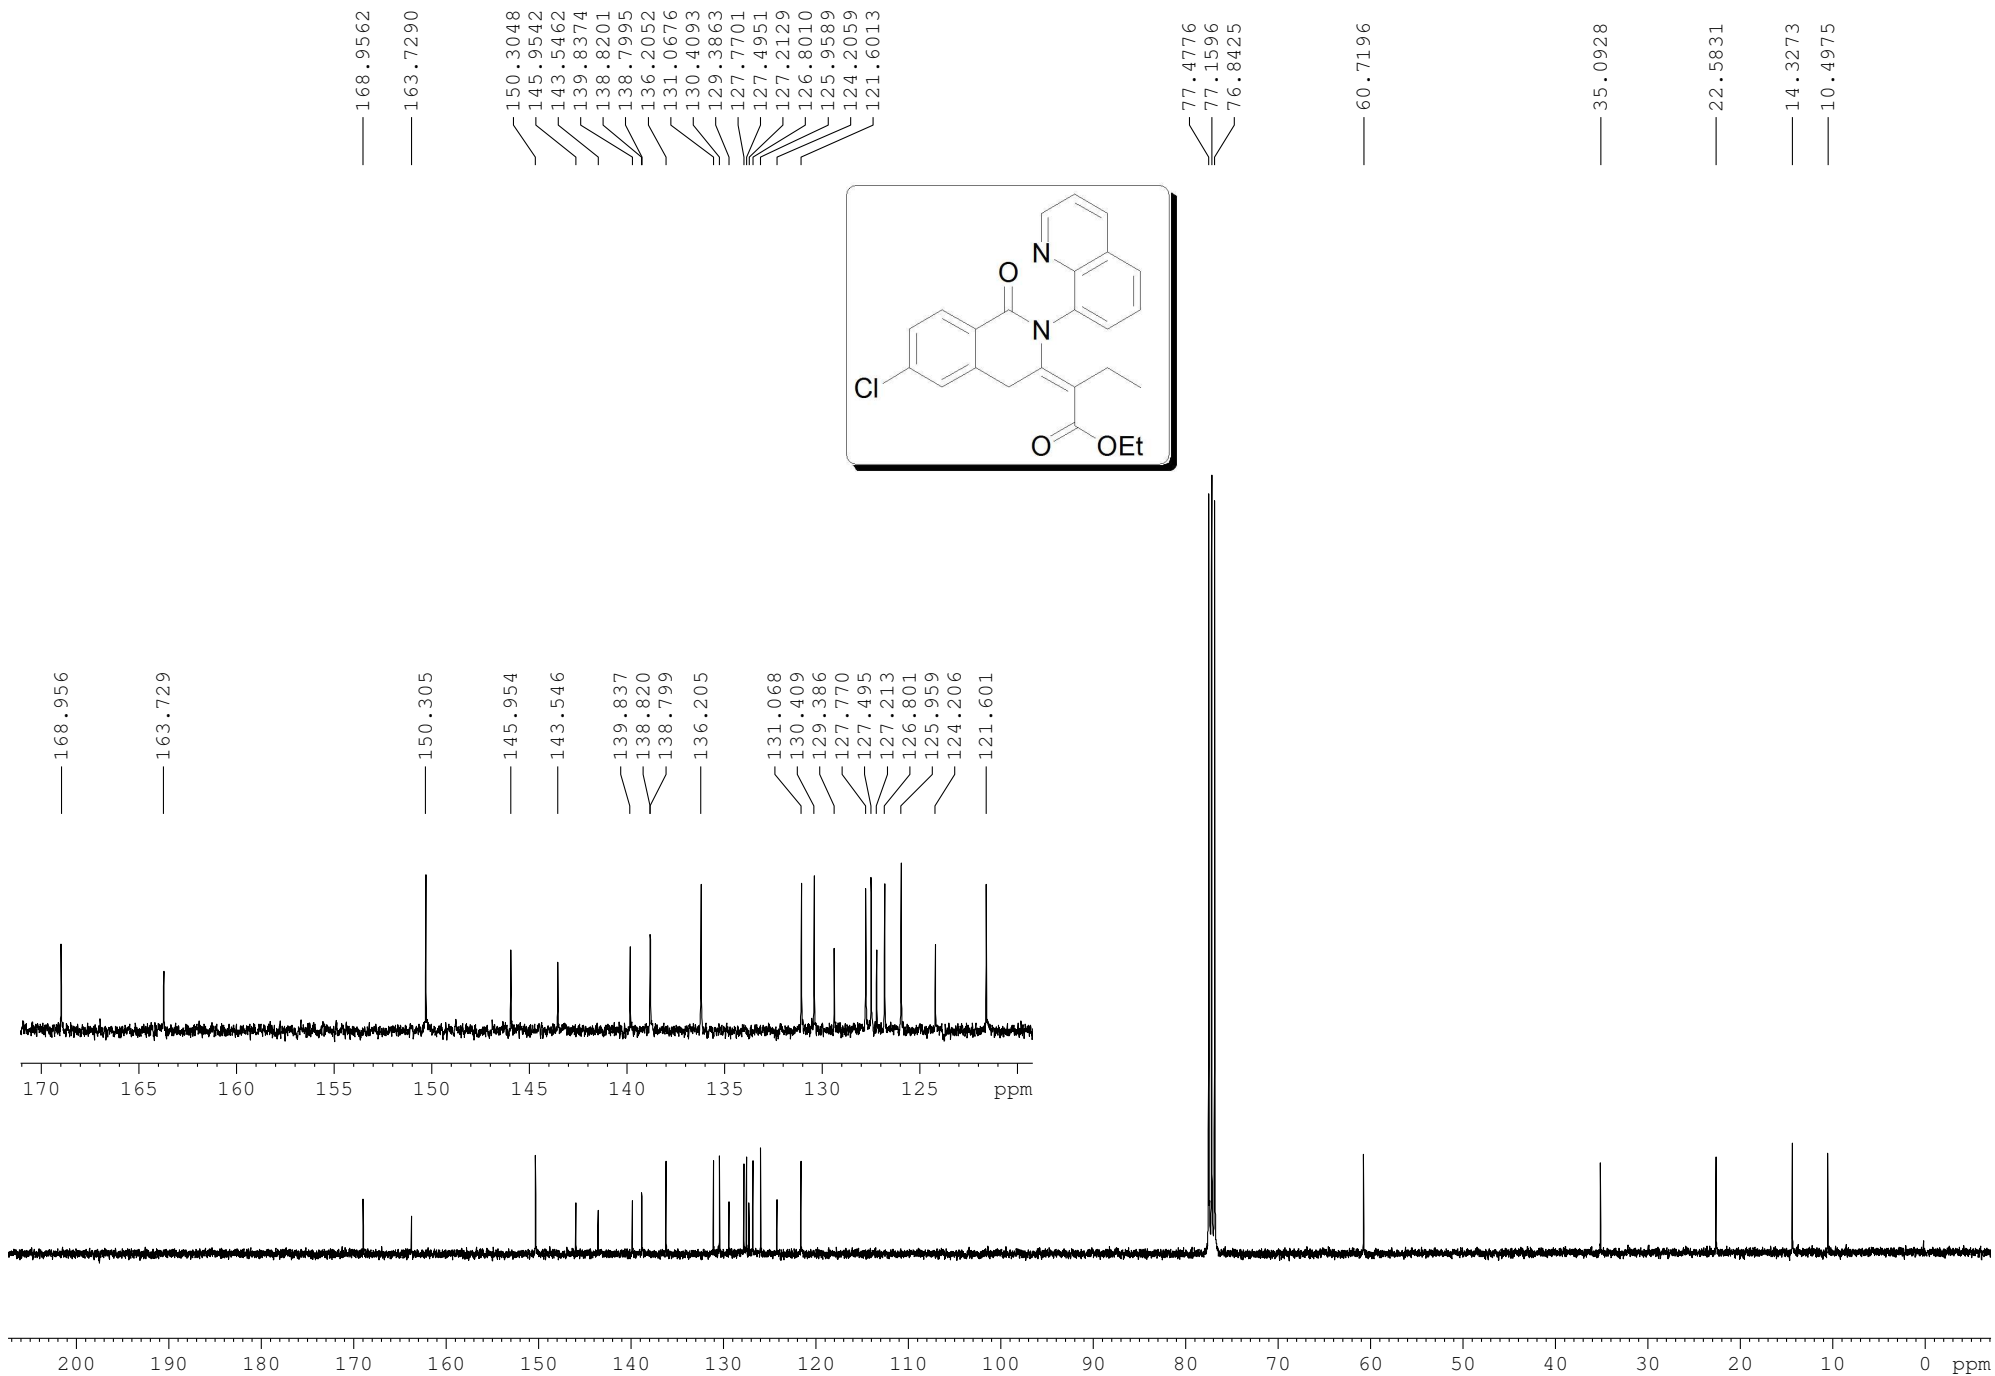

2.1604  
2.1420  
2.0698  
2.0624  
2.0432

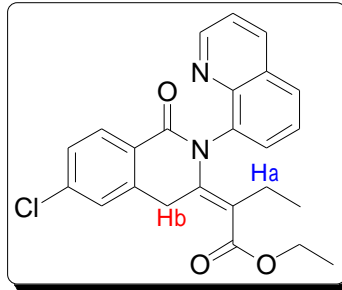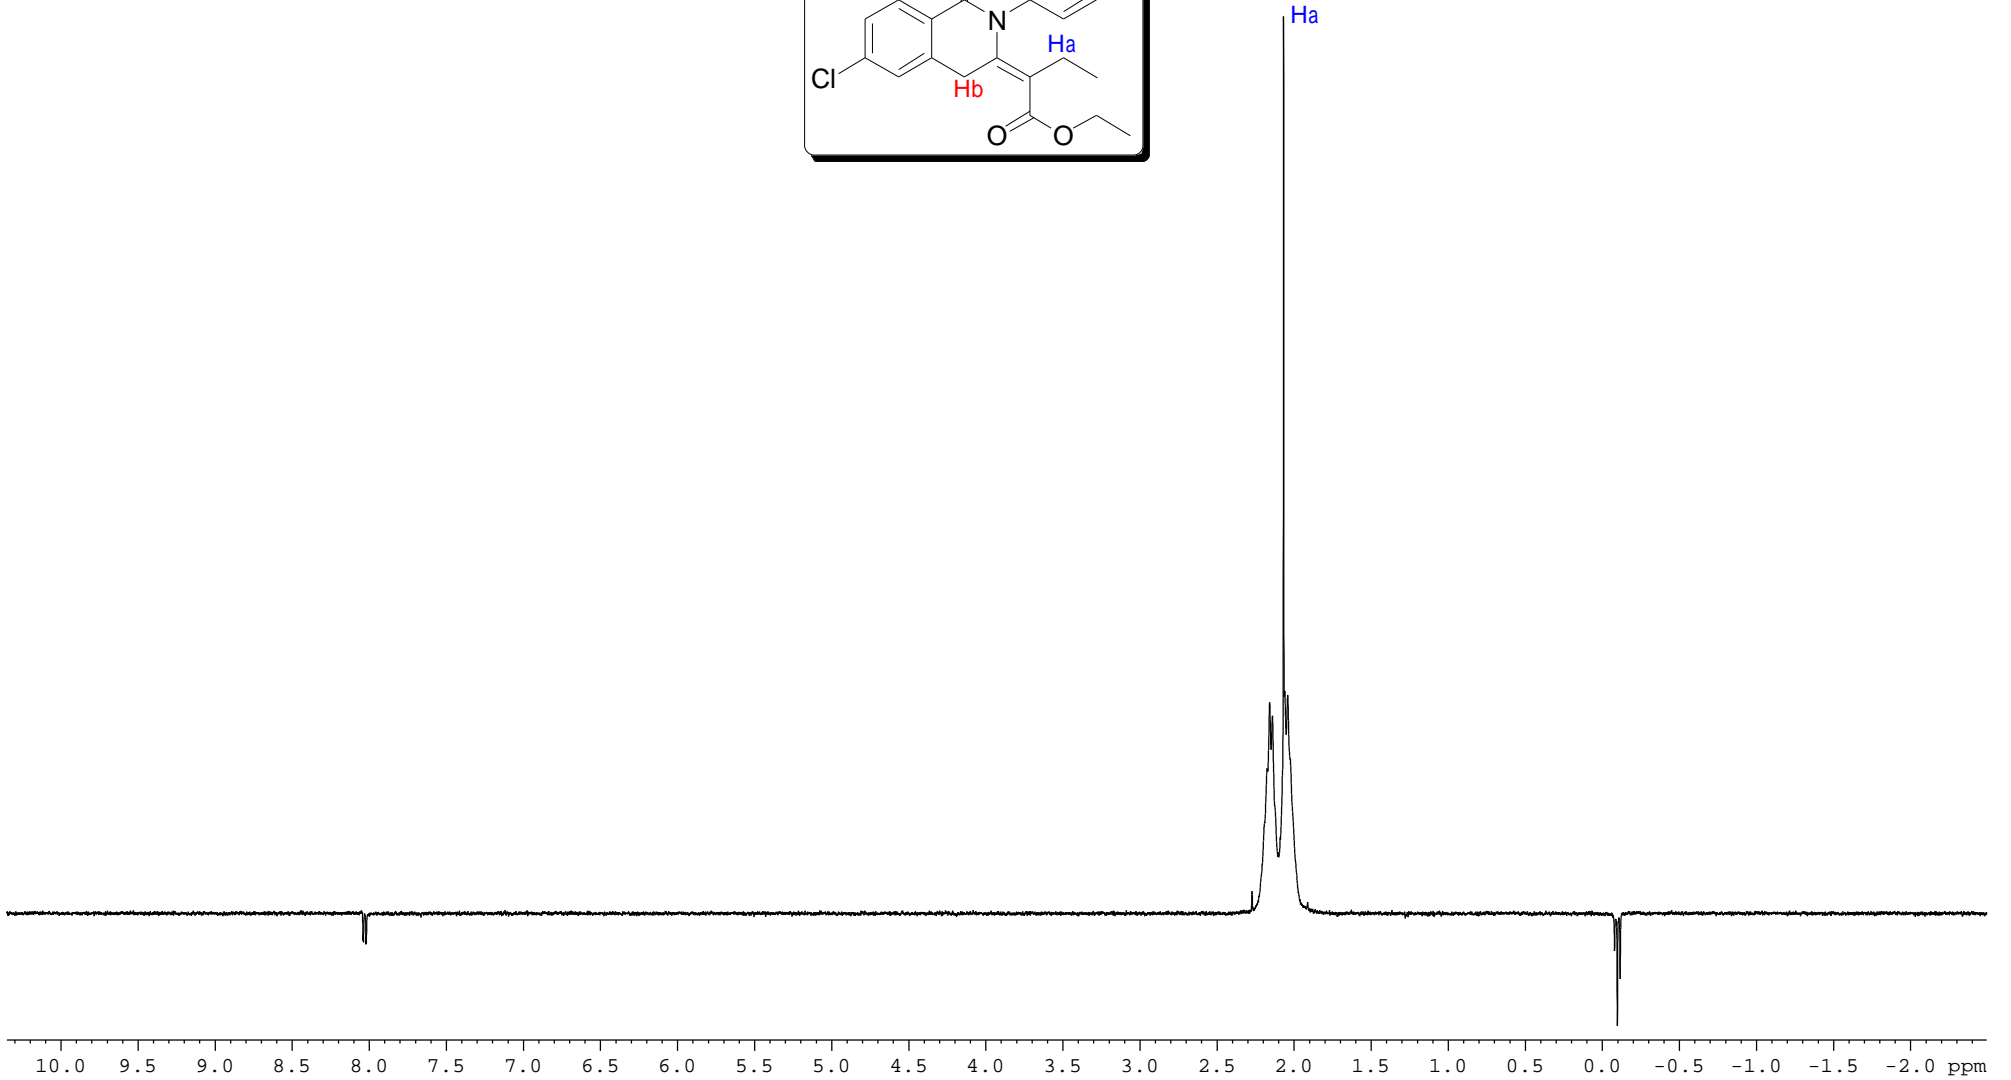

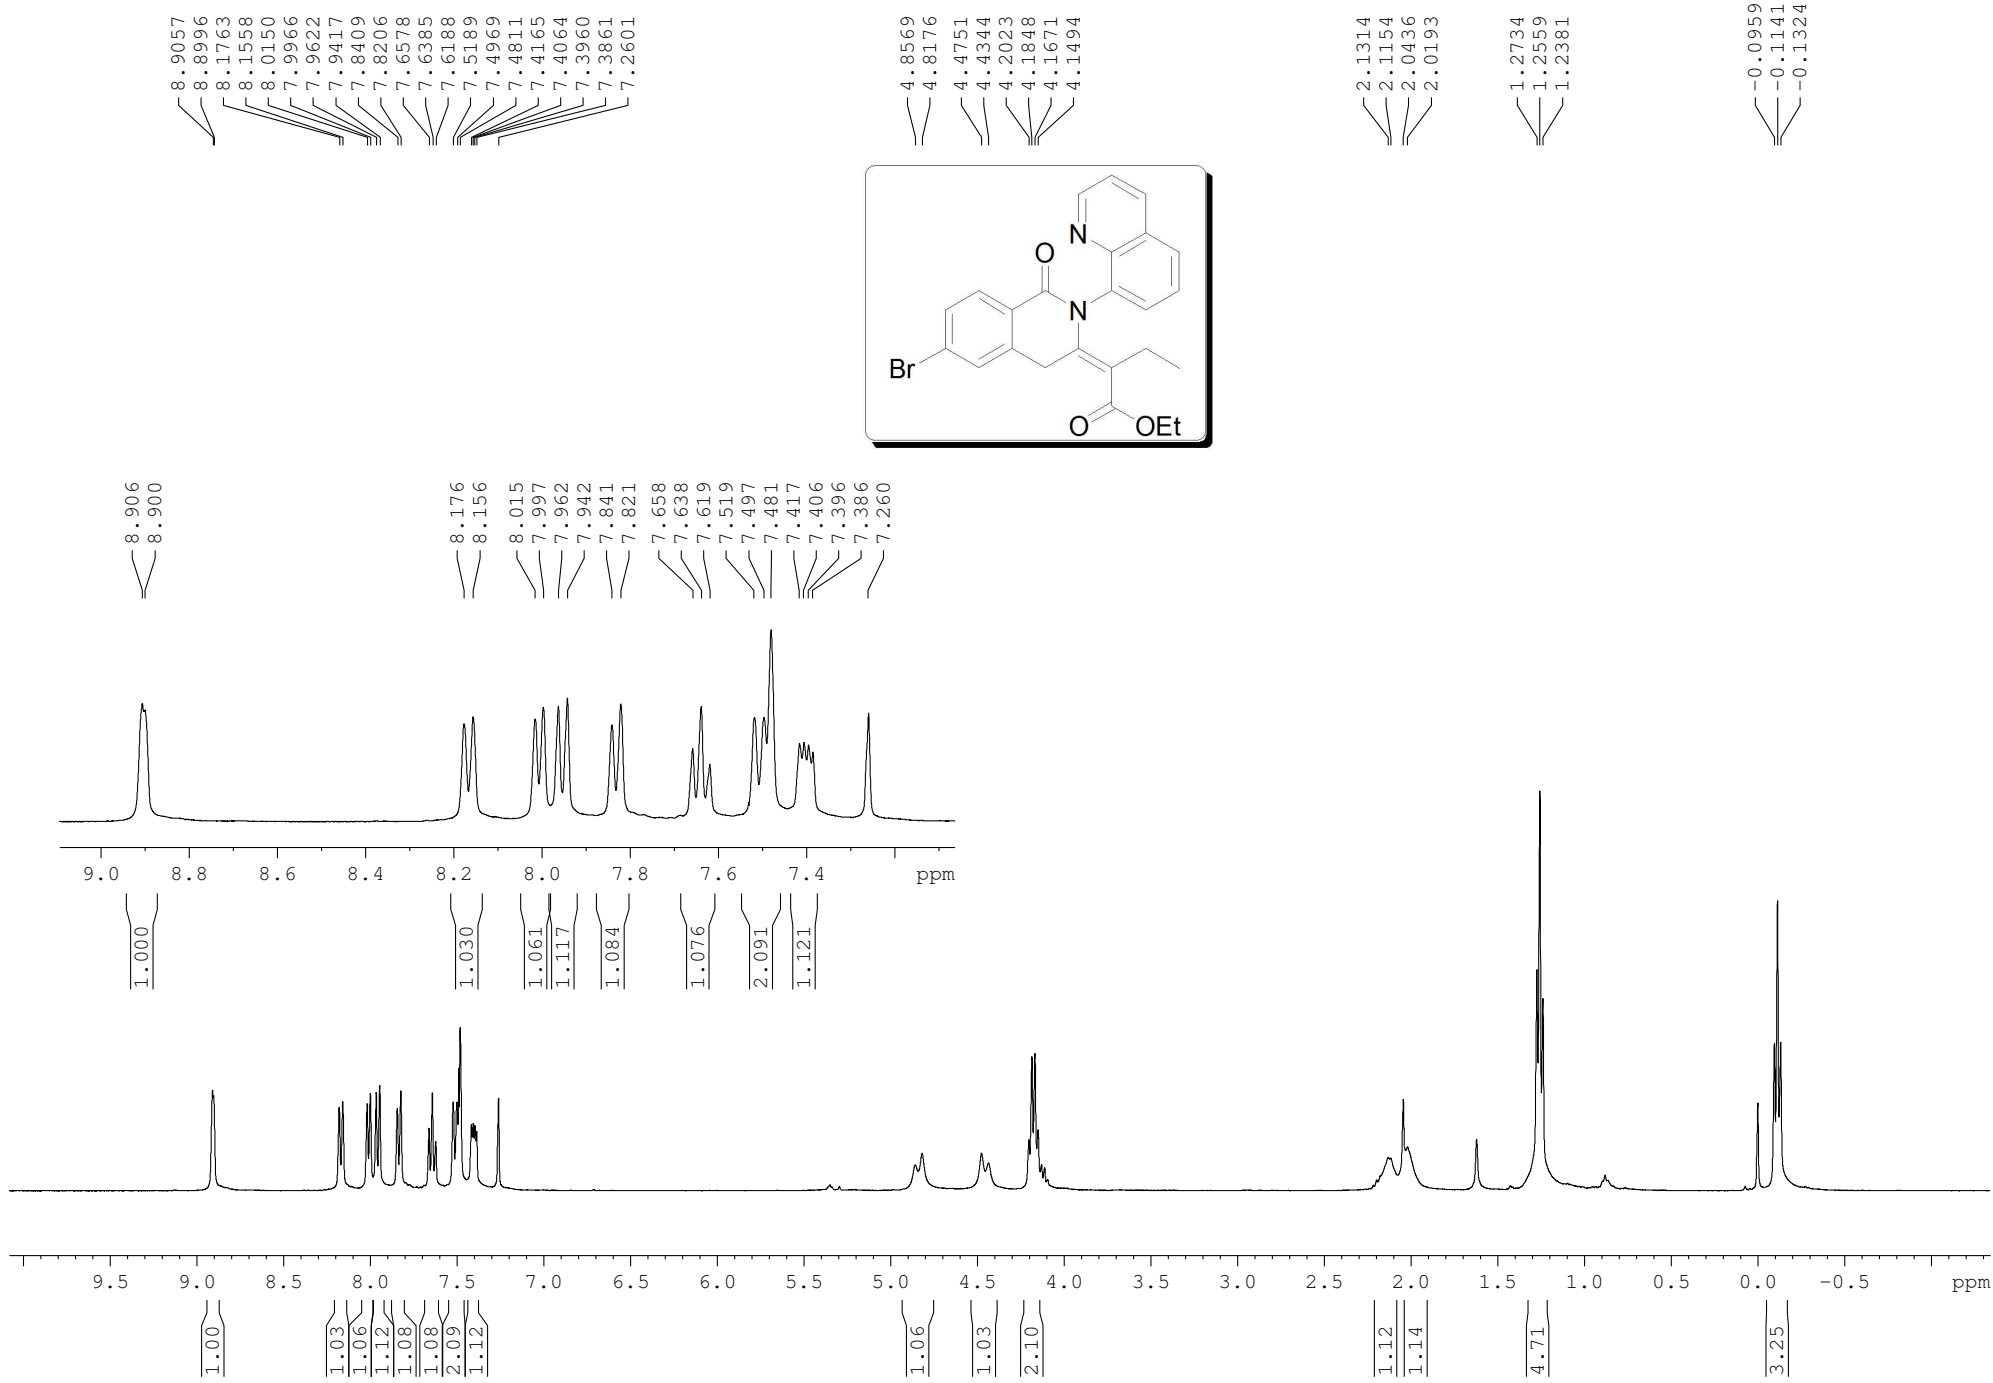



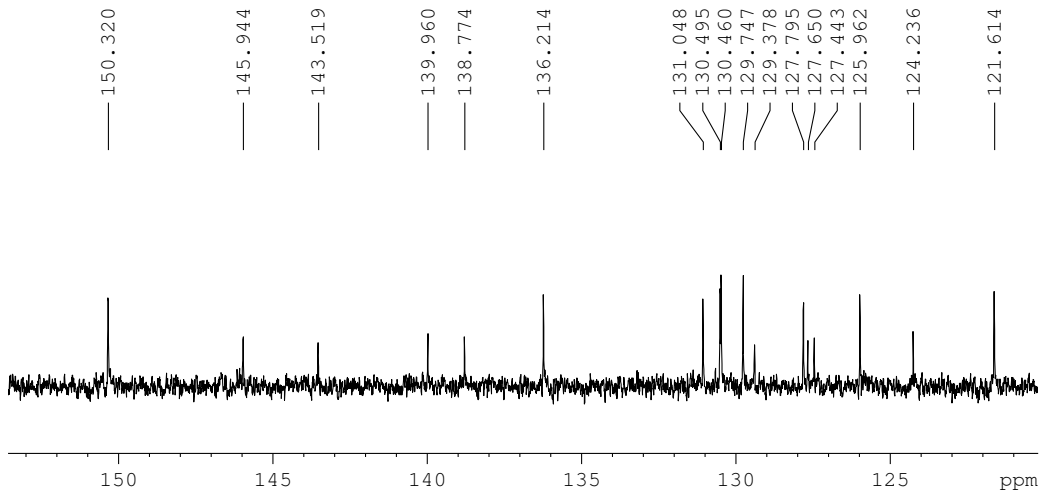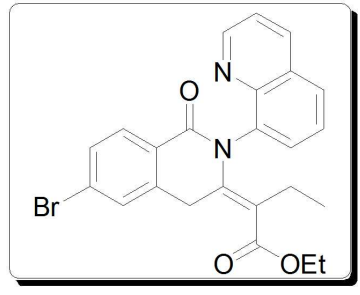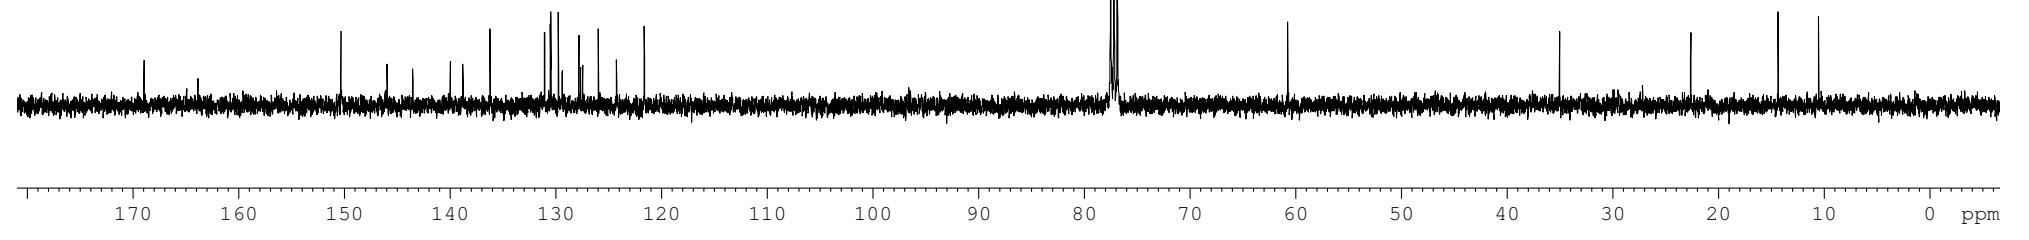

- 168.9383
- 163.8430
- 150.3199
- 145.9437
- 143.5192
- 139.9601
- 138.7739
- 136.2145
- 131.0482
- 130.4948
- 130.4597
- 129.7471
- 129.3776
- 127.7951
- 127.6498
- 127.4426
- 125.9617
- 124.2356
- 121.6138

- 77.4903
- 77.1727
- 76.8552

- 60.7371

- 35.0027

- 22.5934

- 14.3325

- 10.4958

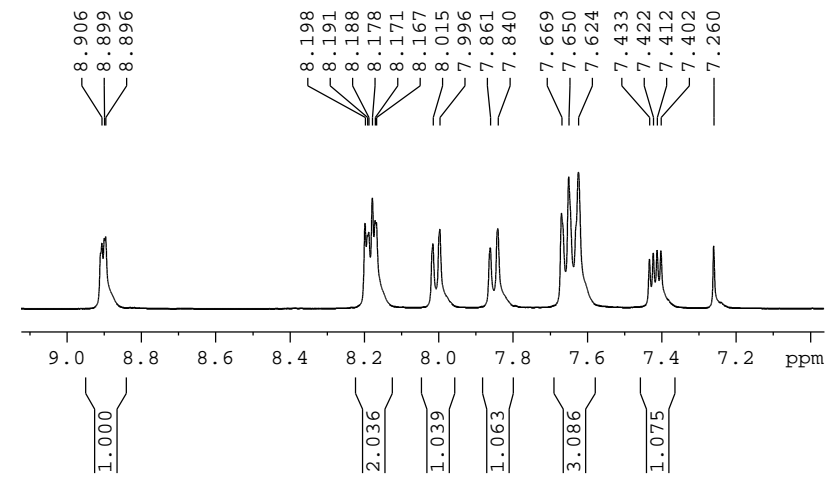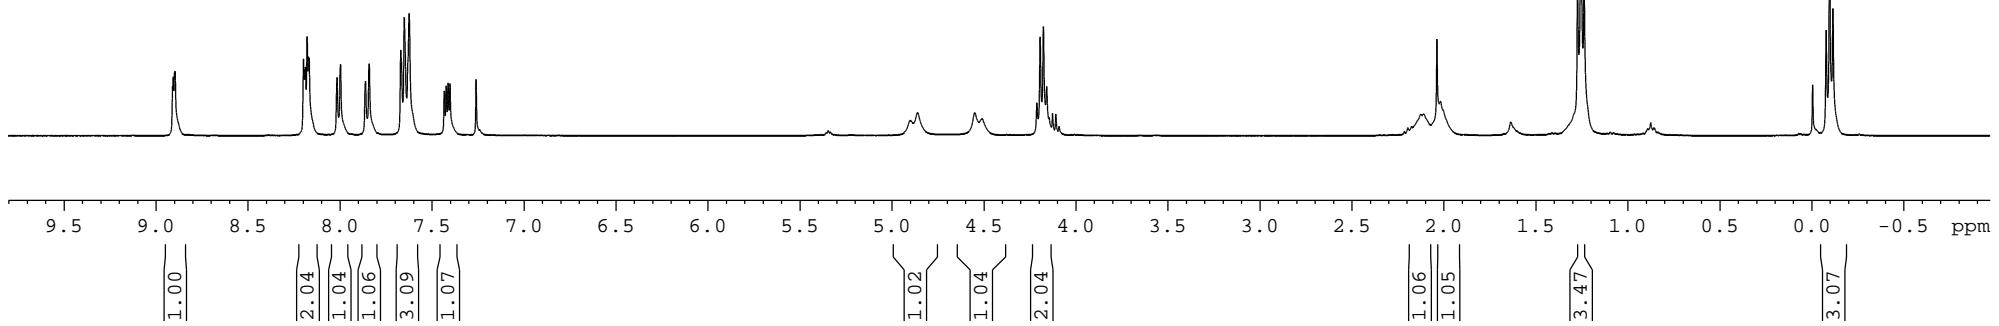

8.9057  
8.8992  
8.8956  
8.1977  
8.1913  
8.1877  
8.1780  
8.1706  
8.1672  
8.0150  
7.9964  
7.8607  
7.8404  
7.6691  
7.6497  
7.6236  
7.4326  
7.4222  
7.4119  
7.4016  
7.2597

4.8994  
4.8600  
4.5493  
4.5105  
4.2113  
4.1936  
4.1759  
4.1582  
4.1445  
4.1262  
4.1084

2.1260  
2.1099  
2.0387  
2.0191  
1.6371  
1.2746  
1.2569  
1.2391  
0.8769

-0.0772  
-0.0955  
-0.1139

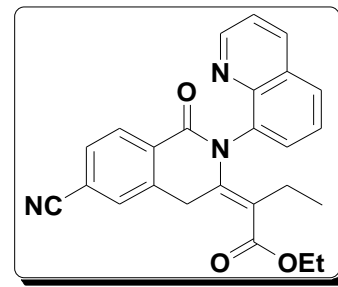

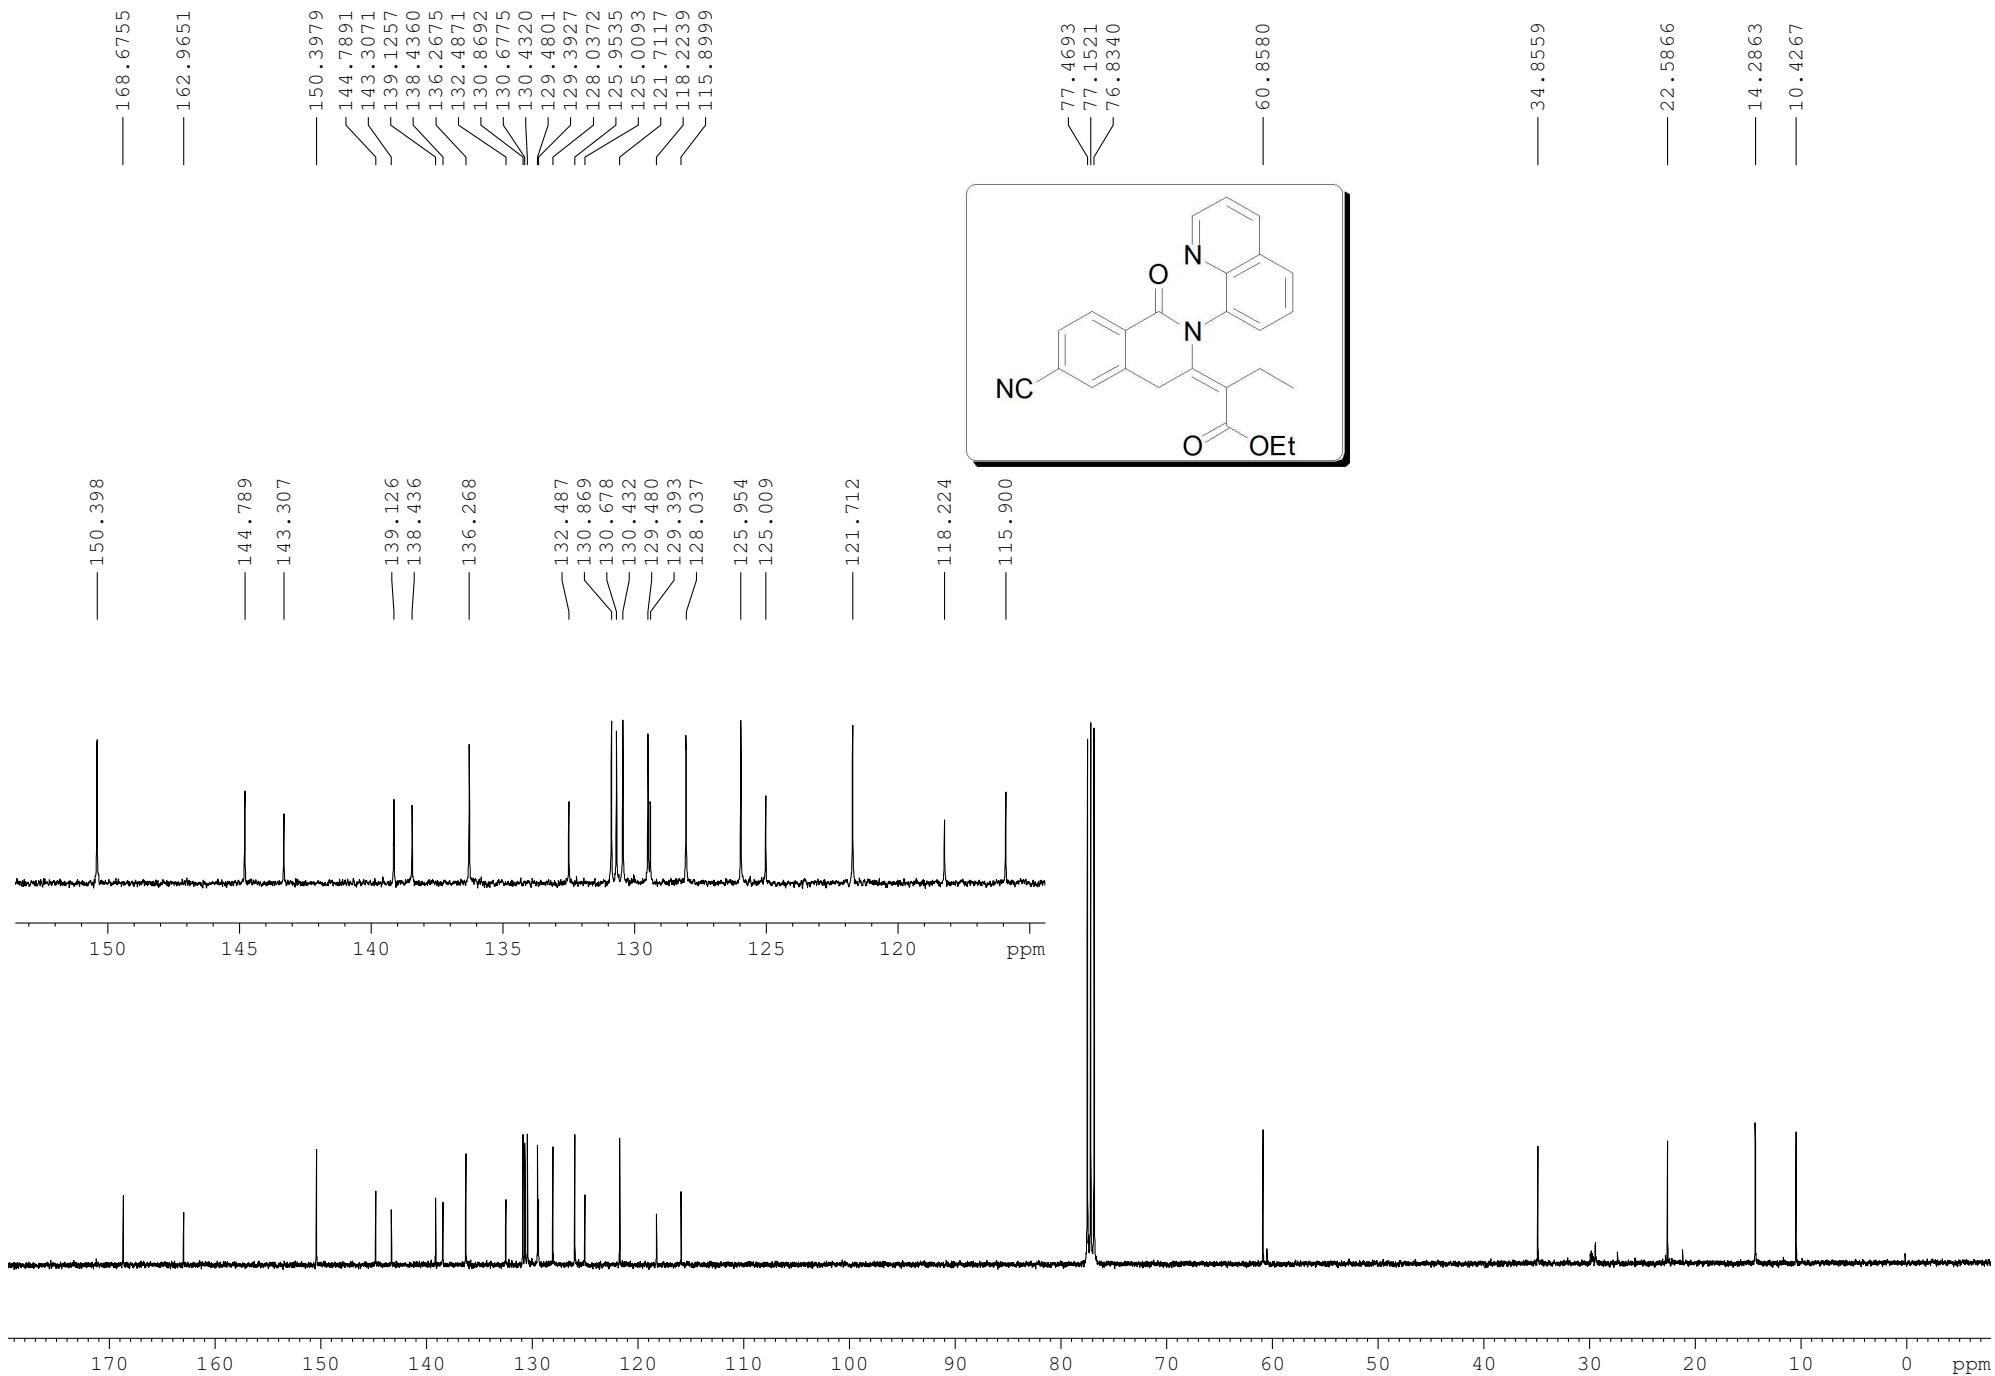

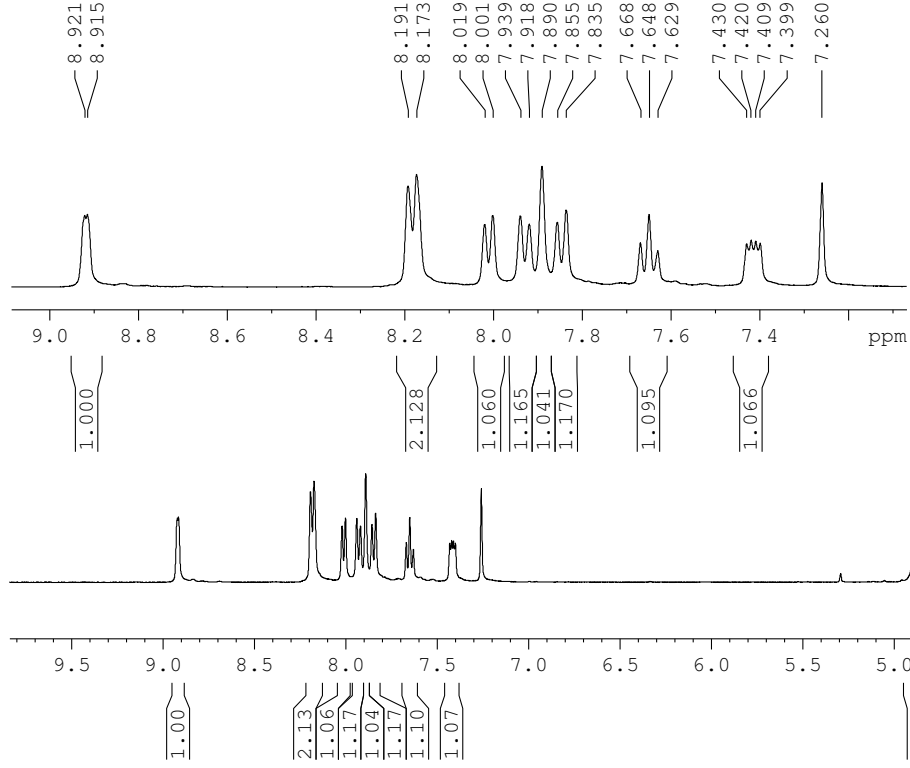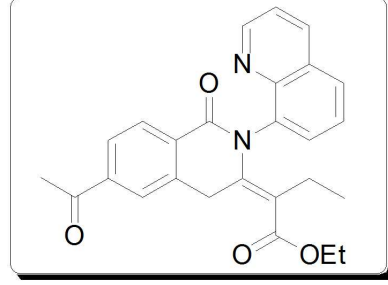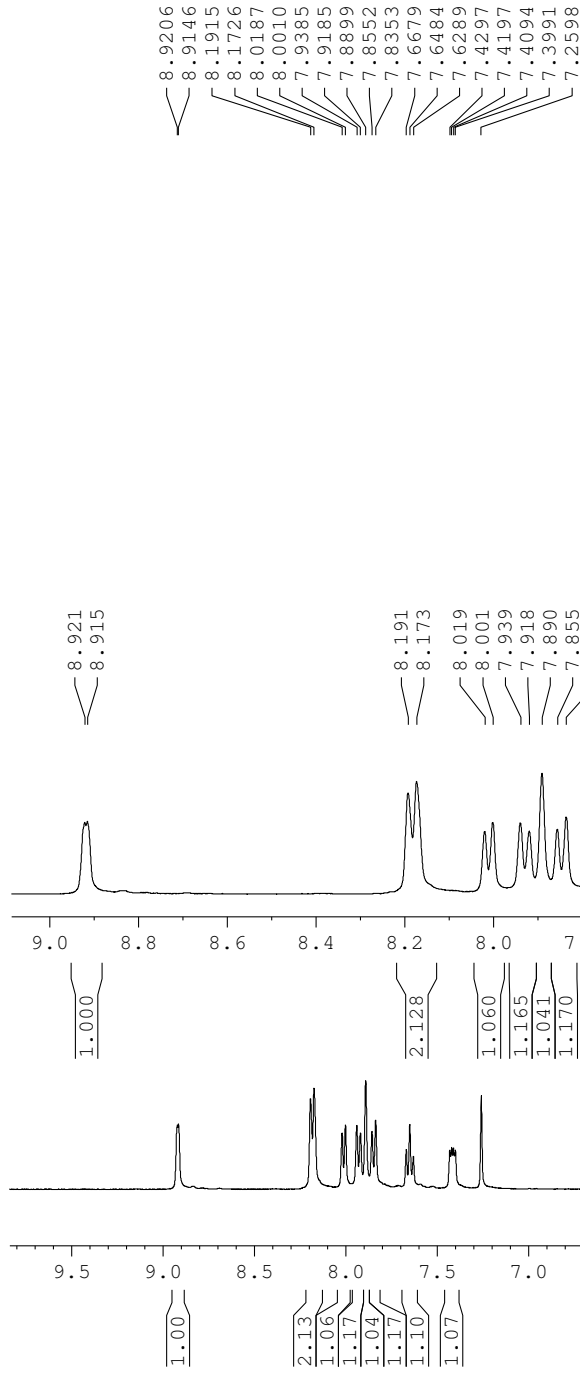

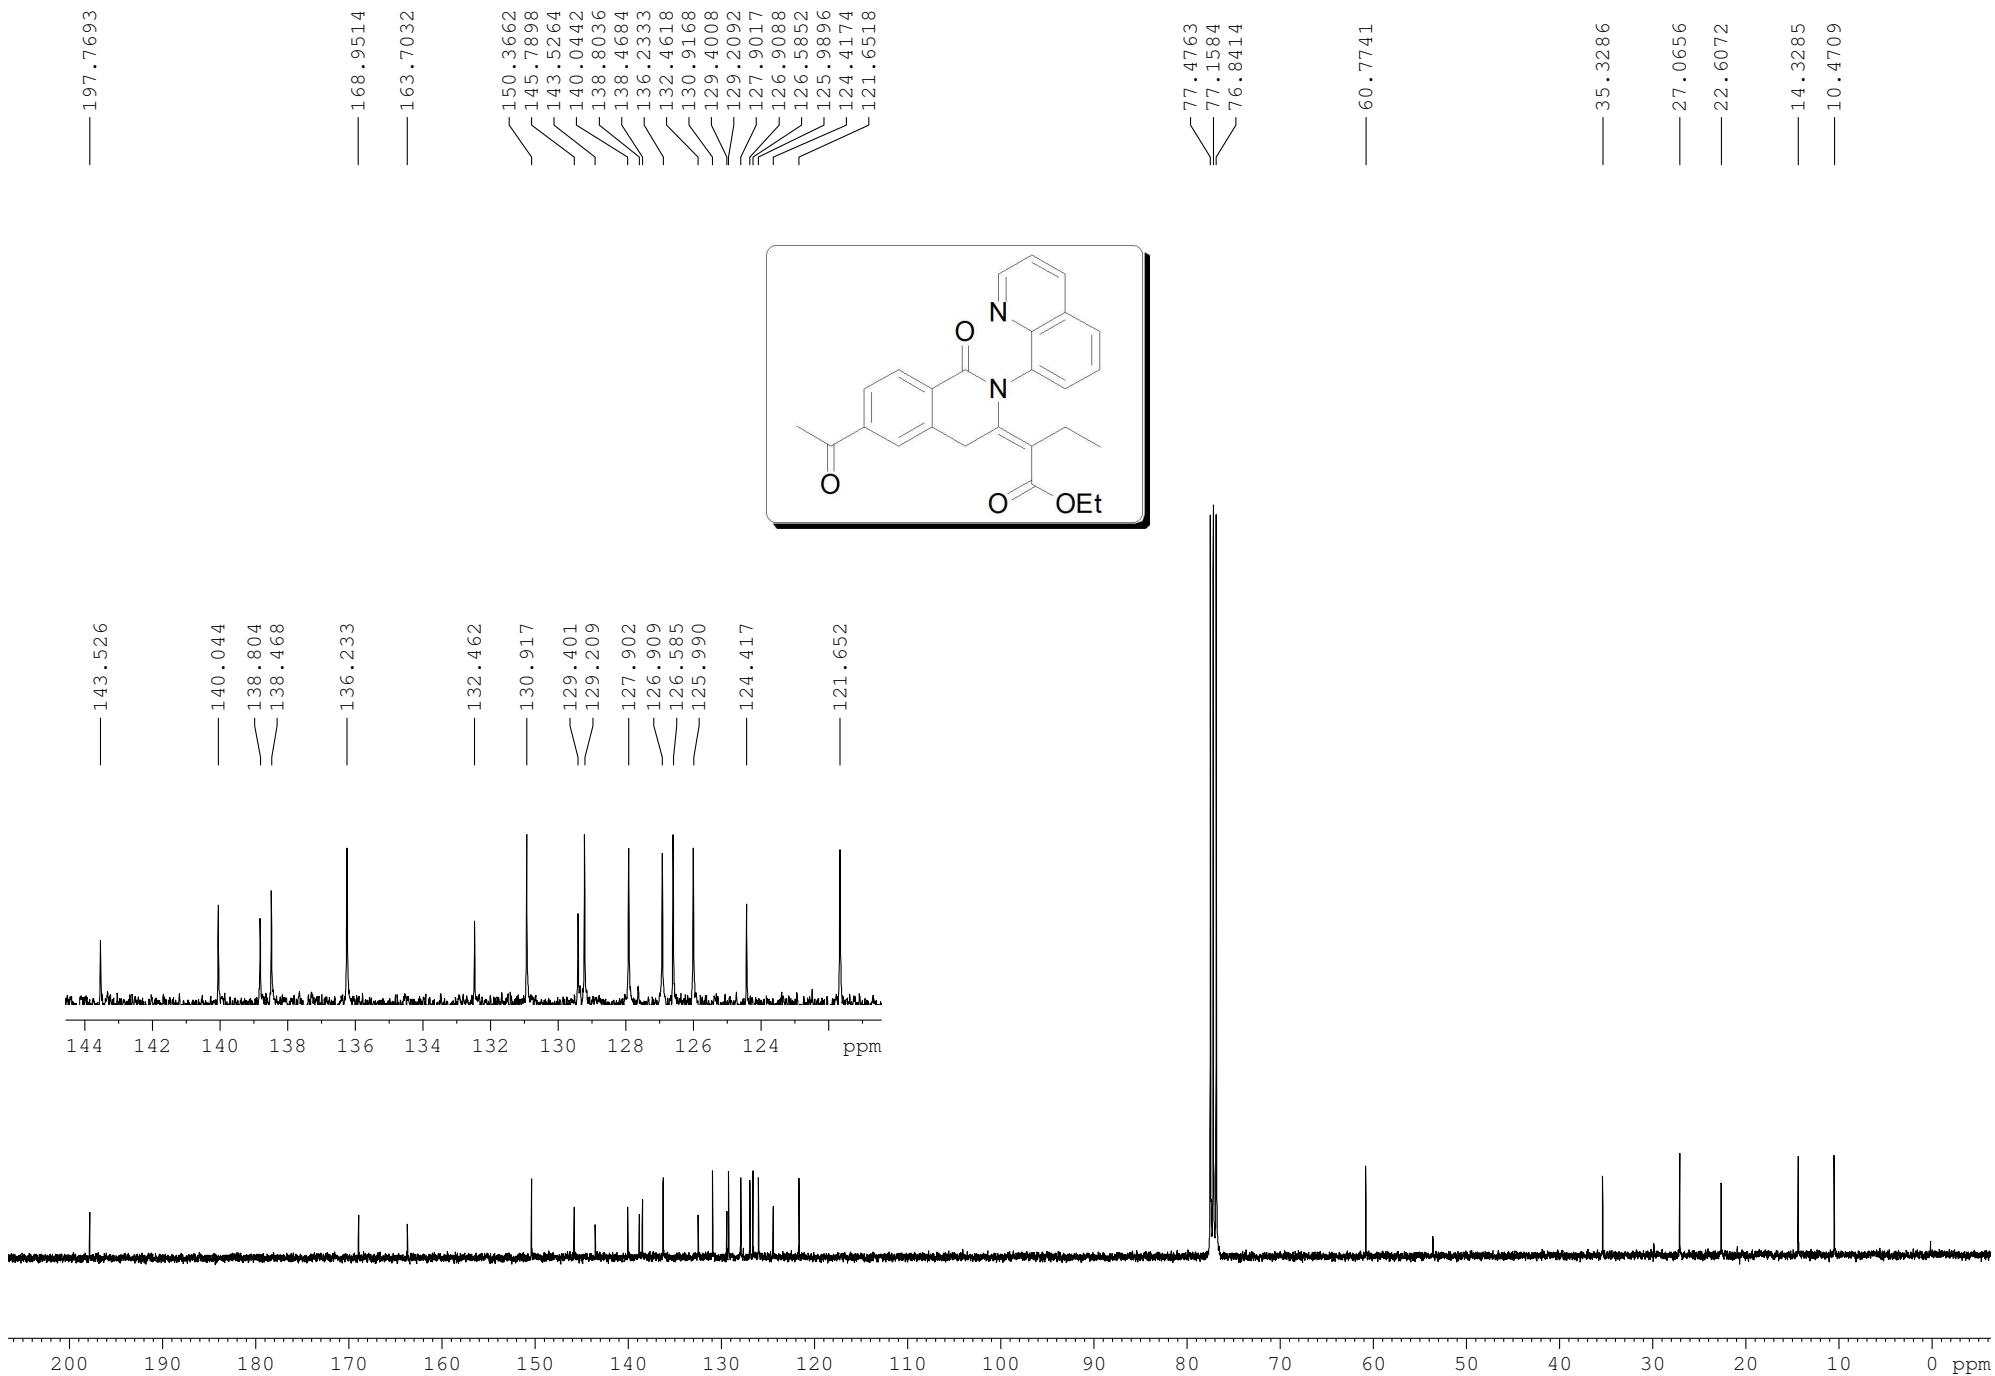

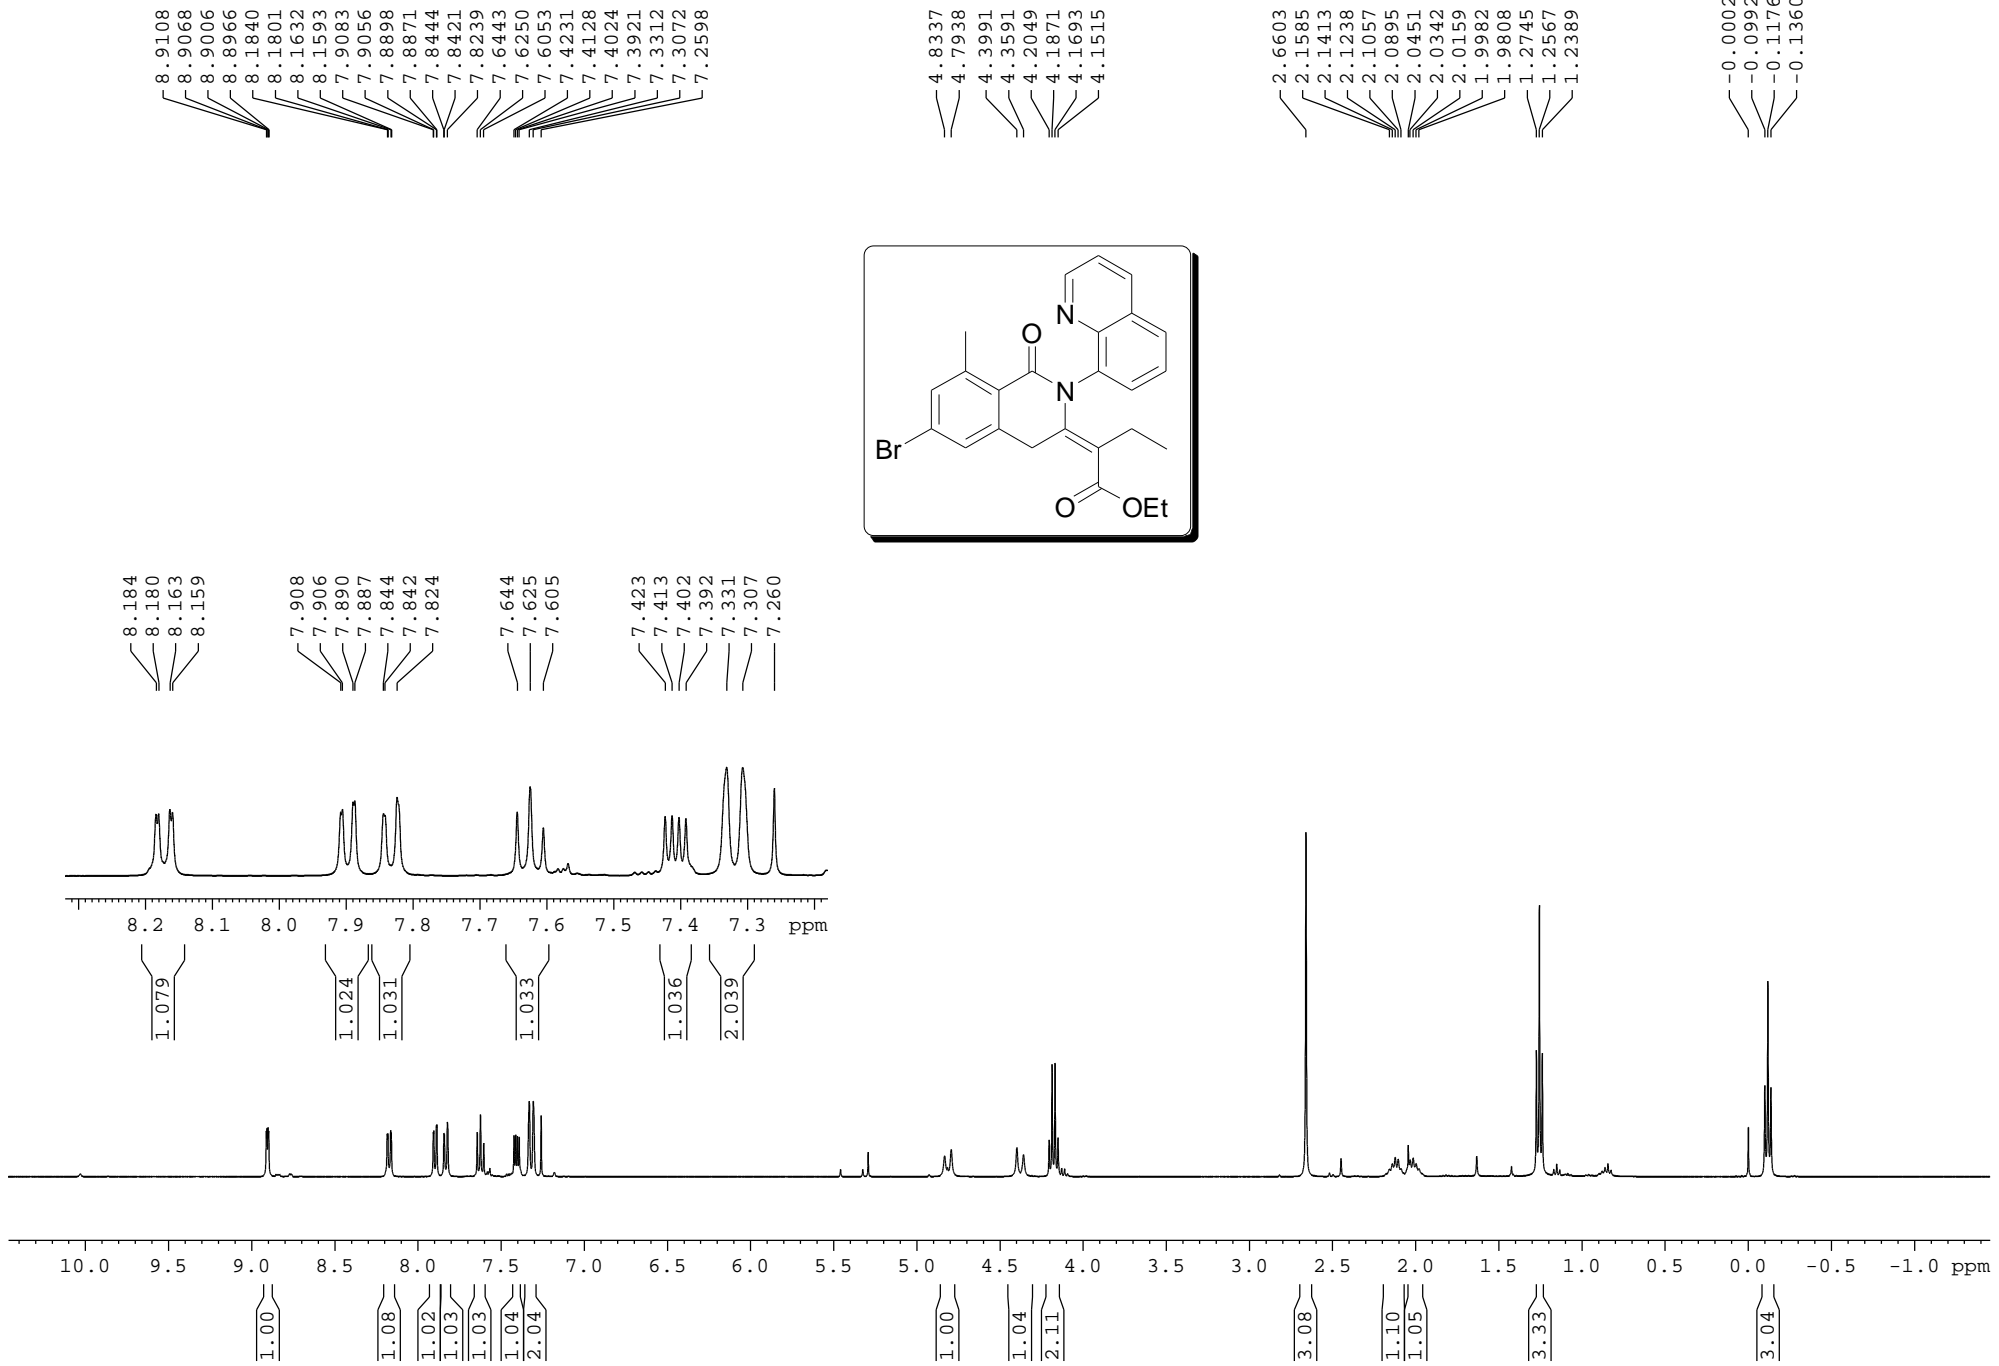

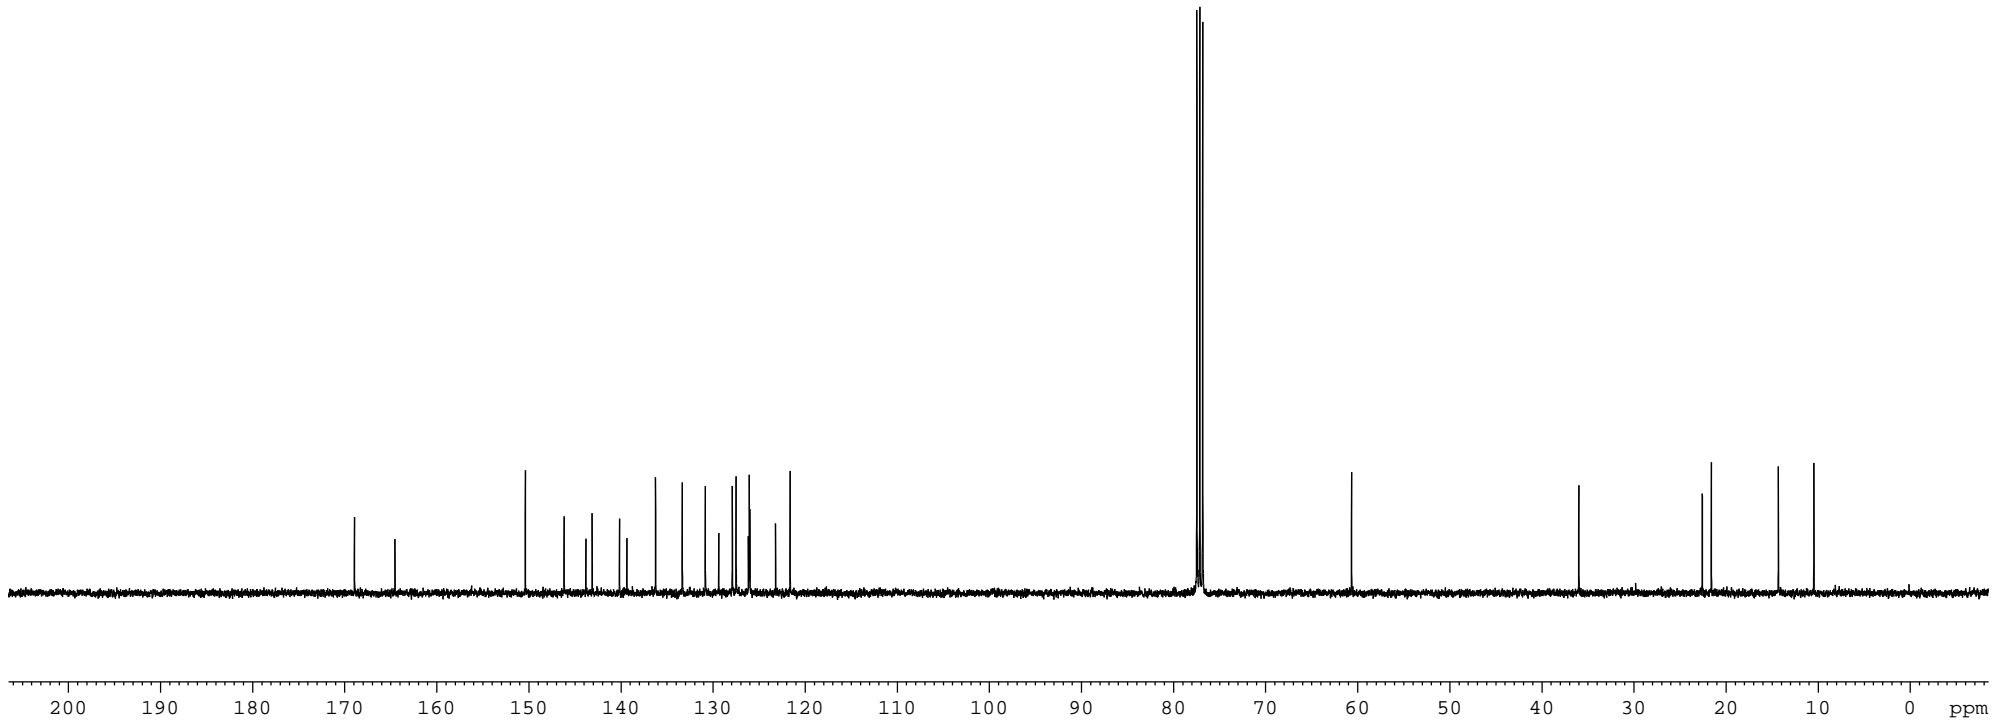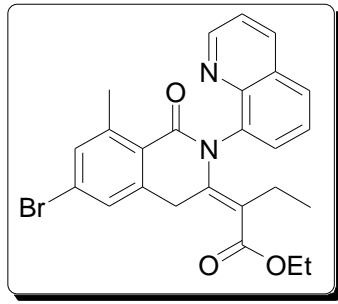

— 168.92  
— 164.53

— 150.40  
— 146.19  
— 143.83  
— 143.14  
— 140.18  
— 139.37  
— 136.26  
— 133.35  
— 130.85  
— 129.39  
— 127.92  
— 127.51  
— 126.18  
— 126.08  
— 126.01  
— 123.23  
— 121.65

— 77.48  
— 77.16  
— 76.84

— 60.68

— 36.00

— 22.58  
— 21.60

— 14.32  
— 10.47

8.2628  
8.2456  
8.2419  
8.2264  
8.2226  
8.2056  
8.2018  
8.1613  
8.1466  
8.1386  
8.1237  
7.9711  
7.9641  
7.9529  
7.9505  
7.9399  
7.7024  
7.6835  
7.6745  
7.6642  
7.6178  
7.6023  
7.5999  
7.4703  
7.4598  
7.4494  
7.4453  
7.4390  
7.4352  
7.2584  
7.1028  
7.0850  
7.0693  
5.5311  
5.5135  
5.4848  
5.4672

4.8118  
4.6065  
4.0959  
4.0775  
4.0683  
4.0588  
4.0497  
4.0349  
4.0317  
4.0246  
4.0176  
4.0065  
4.0000  
3.9888  
3.9788

1.9237  
1.9061  
1.7595  
1.7419

1.1493  
1.1319  
1.1143

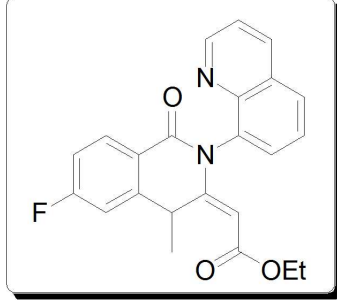

8.88  
8.87  
8.87  
8.86  
8.84  
8.27  
8.26  
8.25  
8.24  
8.21  
8.16  
8.15  
8.14  
8.12  
7.97  
7.95  
7.95  
7.70  
7.68  
7.67  
7.66  
7.62  
7.60  
7.60  
7.47  
7.46  
7.45  
7.45  
7.44  
7.44  
7.26  
7.10  
7.09  
7.07  
7.06

1.00  
0.66  
1.07  
0.73  
1.70  
1.70  
2.41  
1.02  
1.77  
3.41

1.00  
0.66  
1.07  
0.73  
1.70  
1.70  
2.41  
1.02  
1.77  
3.41  
1.69  
0.68  
1.00  
3.61  
2.08  
3.16  
5.38

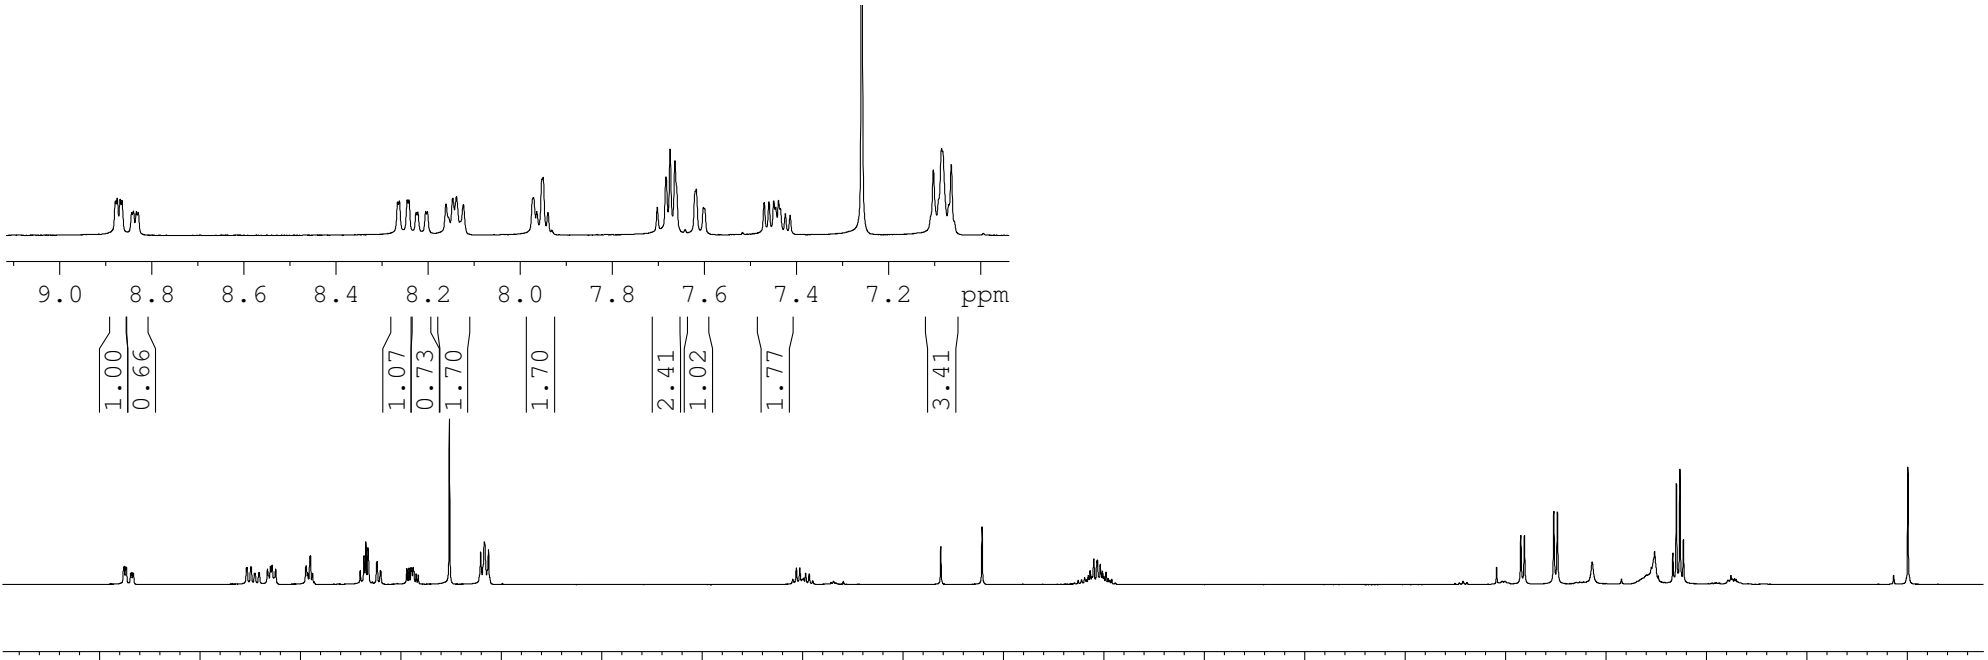



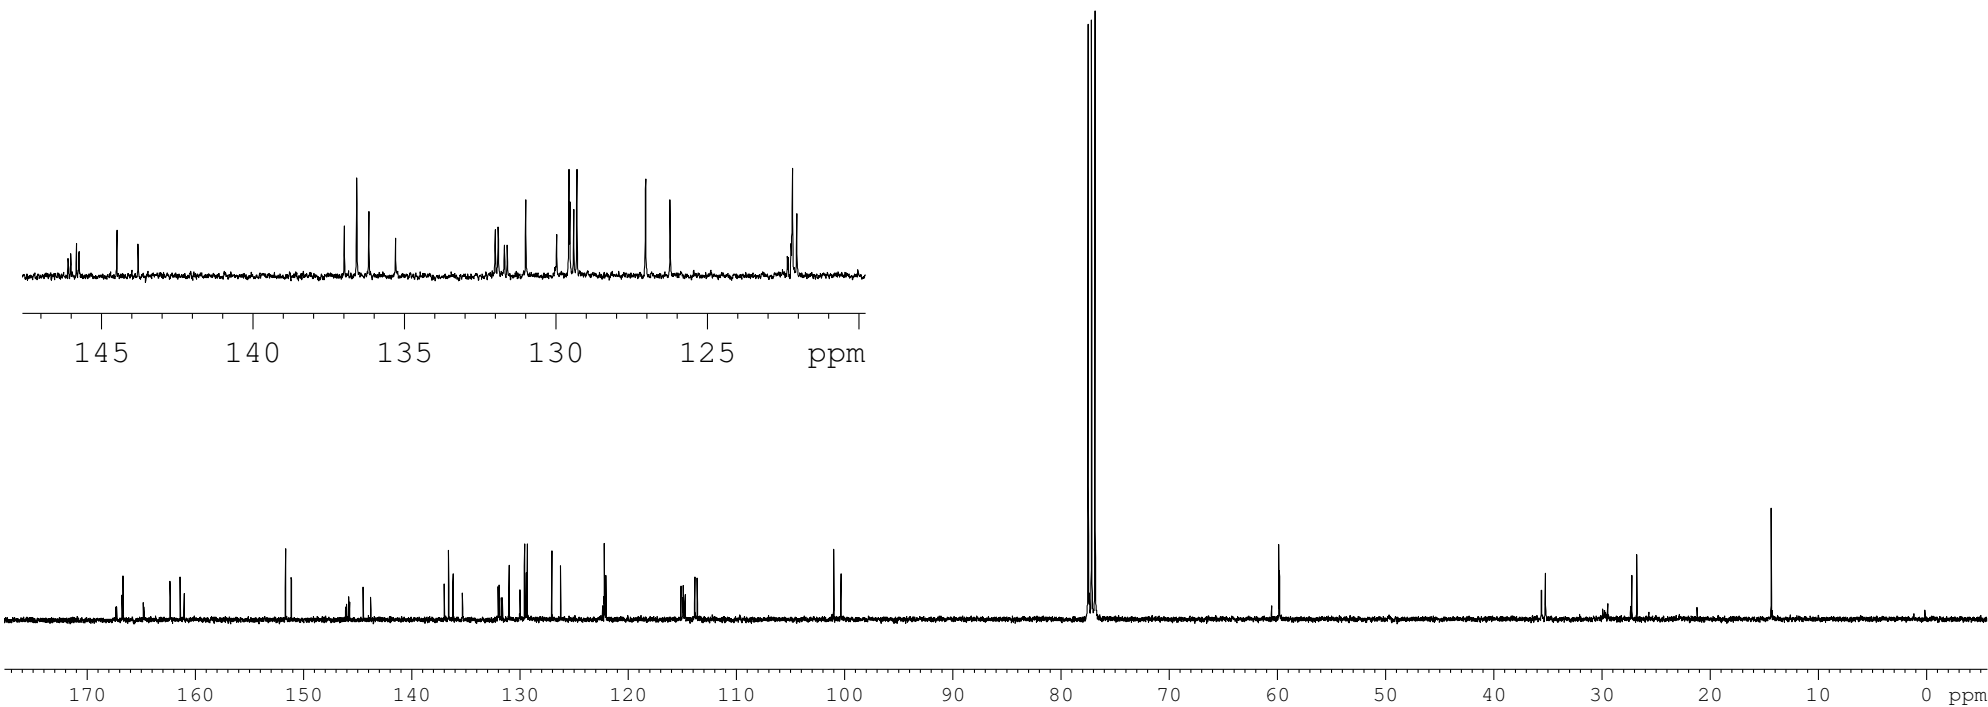

145.999  
145.816  
145.725  
144.476  
143.775

136.981  
136.573  
136.172  
135.289  
132.000  
131.904  
131.699  
131.602  
130.994  
129.973  
129.566  
129.536  
129.406  
129.303  
127.037  
126.225

122.230  
122.186  
122.045

167.2171  
166.7092  
166.6202  
164.7450  
162.2752  
161.3463  
160.9778  
151.6046  
151.0707  
145.9992  
145.8158  
145.7249  
144.4758  
143.7752  
136.9813  
136.5727  
136.1718  
135.2889  
132.0004  
131.9043  
131.6992  
131.6019  
130.9935  
129.9729  
129.5656  
129.5359  
129.4064  
129.3029  
127.0370  
126.2251  
122.2303  
122.1862  
122.0450  
115.1065  
114.9401  
114.8864  
114.7205  
113.8214  
113.6012  
100.9781  
100.3150

77.4623  
77.1453  
76.8272

59.8319  
59.7775

35.5712  
35.1881

27.2035  
26.7506

14.3260

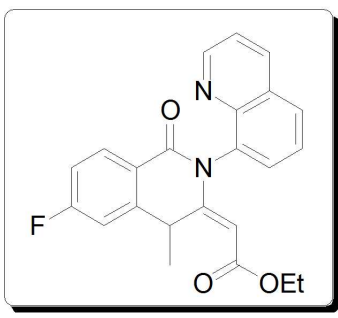

8.8301  
8.2615  
8.2408  
8.2232  
8.2025  
8.0733  
8.0527  
7.9722  
7.9664  
7.9529  
7.9417  
7.7026  
7.6834  
7.6737  
7.6635  
7.6186  
7.6009  
7.4697  
7.4592  
7.4478  
7.4375  
7.4259  
7.4150  
7.4050  
7.3934  
7.3865  
7.3632  
7.2606

5.5208  
5.5033  
5.4862  
5.4738  
5.4561

4.8204  
4.6098  
4.0990  
4.0802  
4.0712  
4.0519  
4.0369  
4.0340  
4.0199  
4.0073  
3.9895  
3.9797  
3.9619

1.9219  
1.9042  
1.7570  
1.7395

1.1513  
1.1339

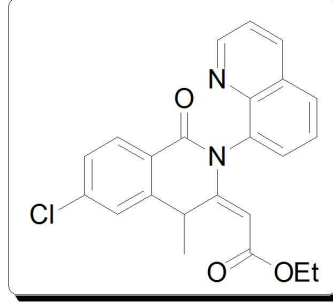

8.26  
8.24  
8.22  
8.20

8.07  
8.05  
7.97  
7.97  
7.95  
7.94

7.70  
7.68  
7.67  
7.66  
7.62  
7.60  
7.47  
7.46  
7.45  
7.44  
7.43  
7.42  
7.41  
7.39  
7.39  
7.36  
7.26

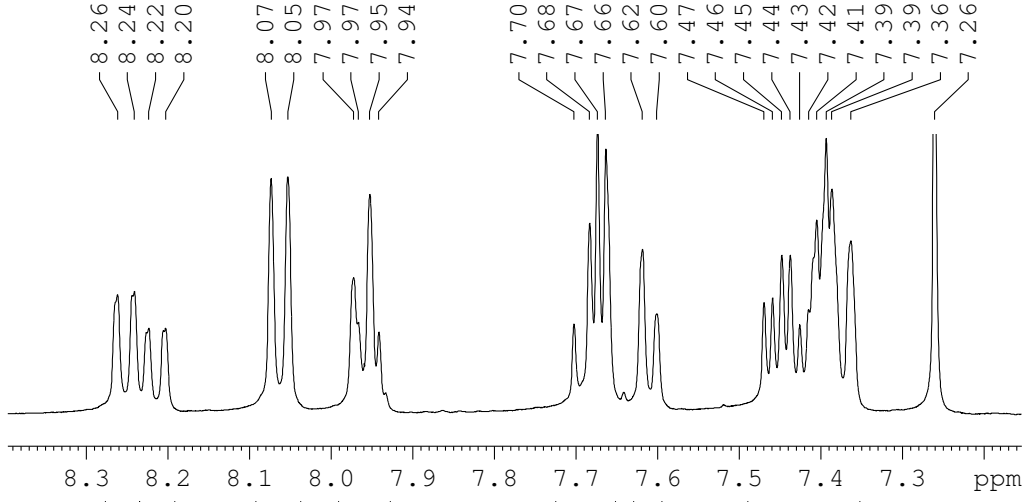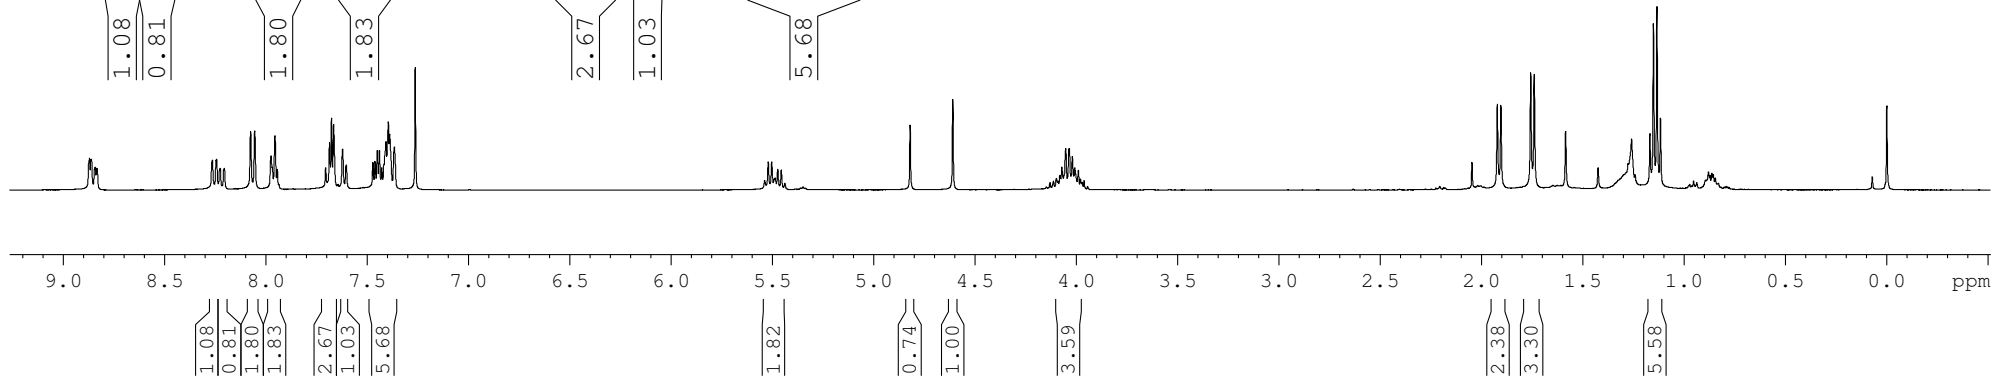

9.0 8.5 8.0 7.5 7.0 6.5 6.0 5.5 5.0 4.5 4.0 3.5 3.0 2.5 2.0 1.5 1.0 0.5 0.0 ppm

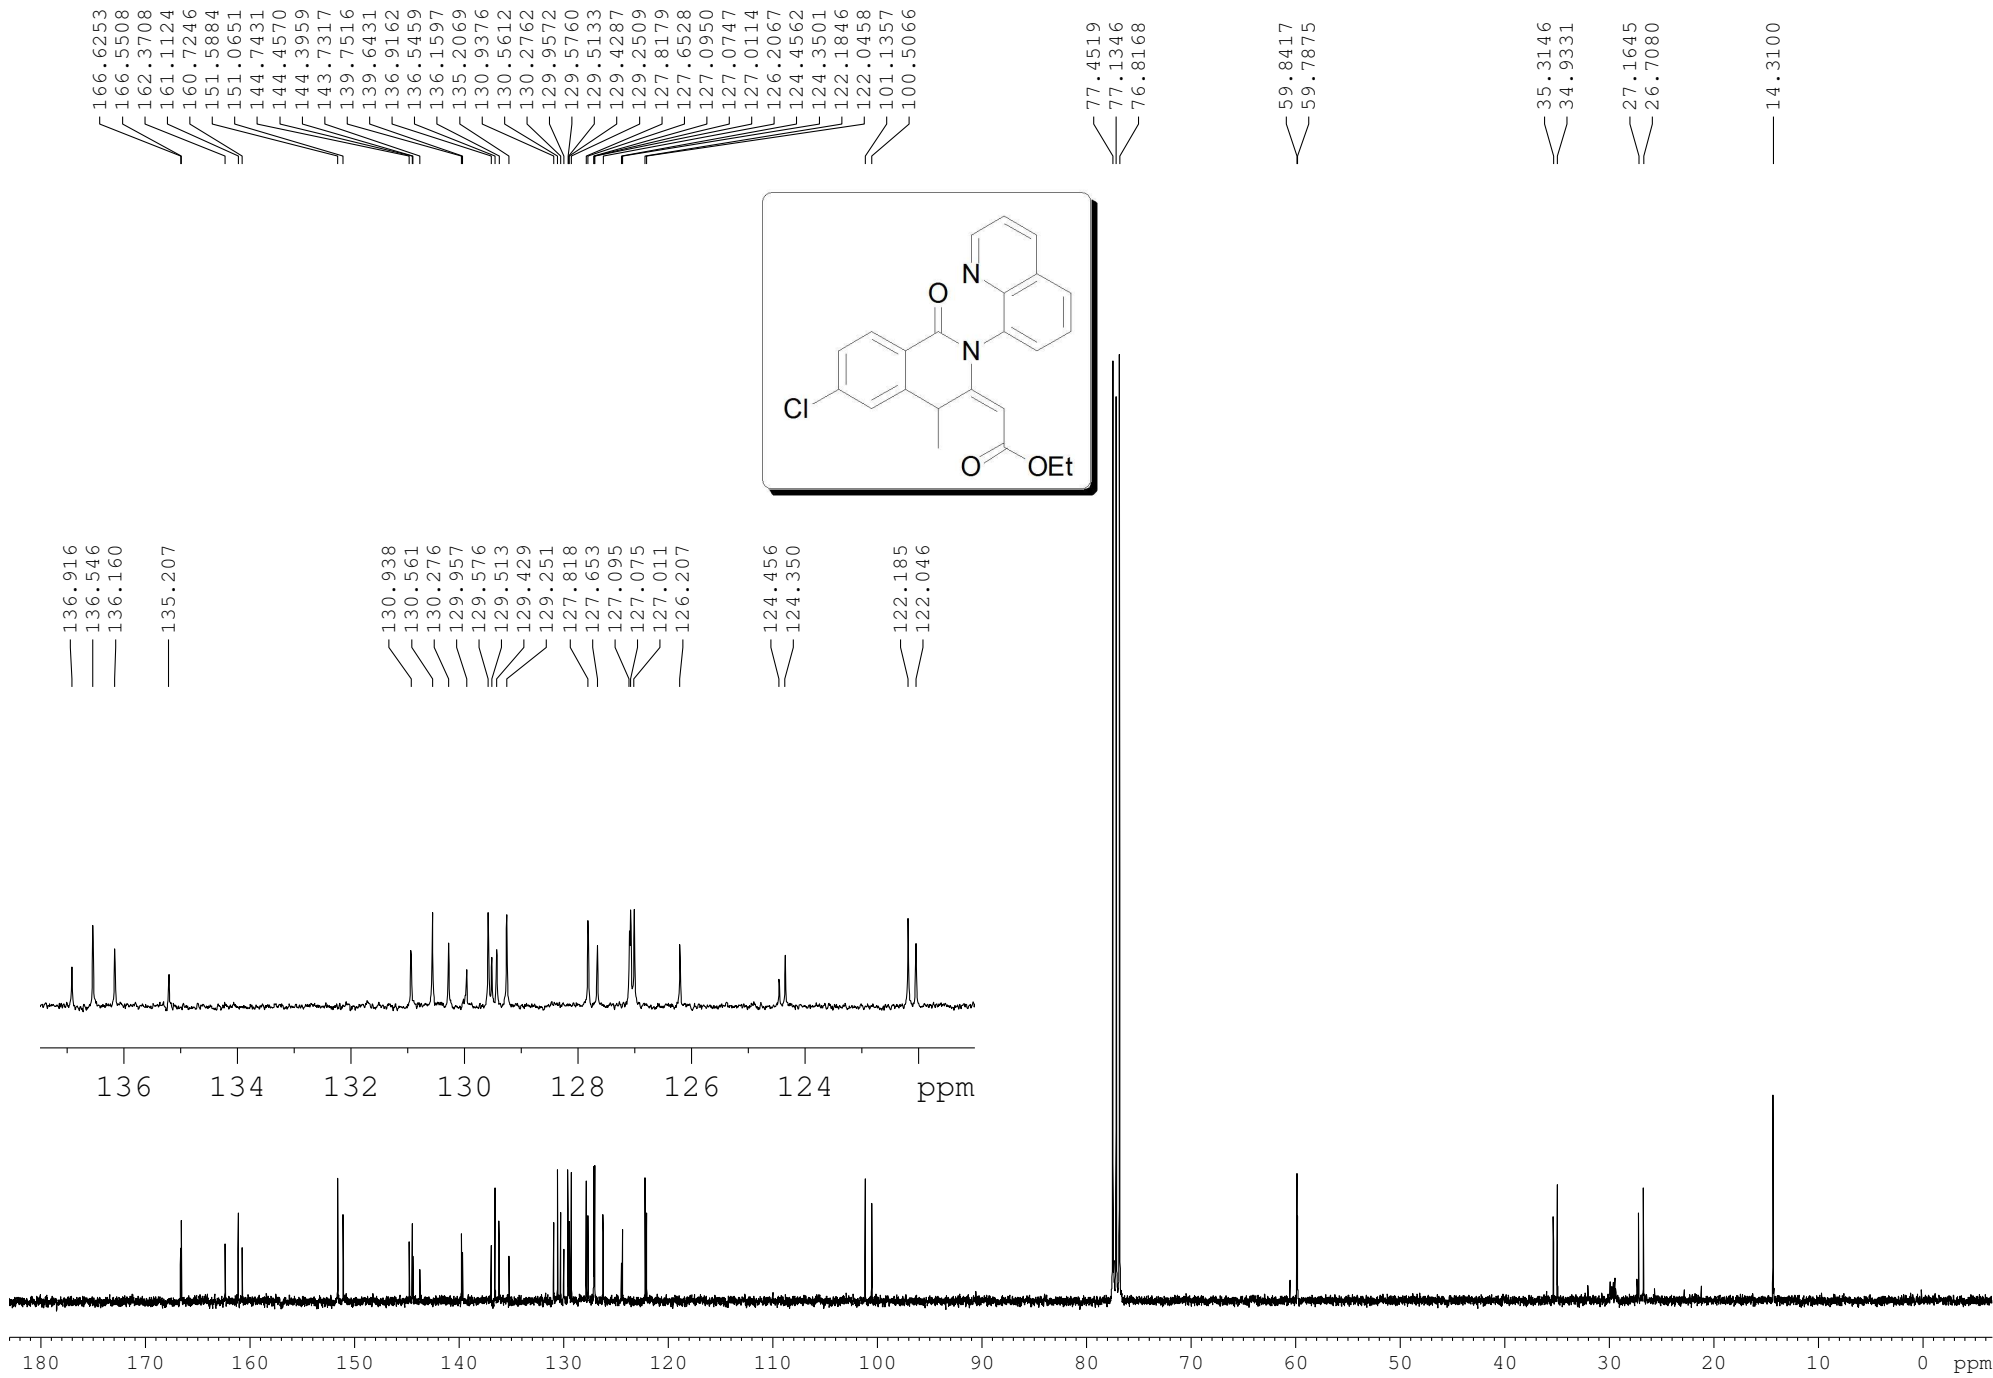

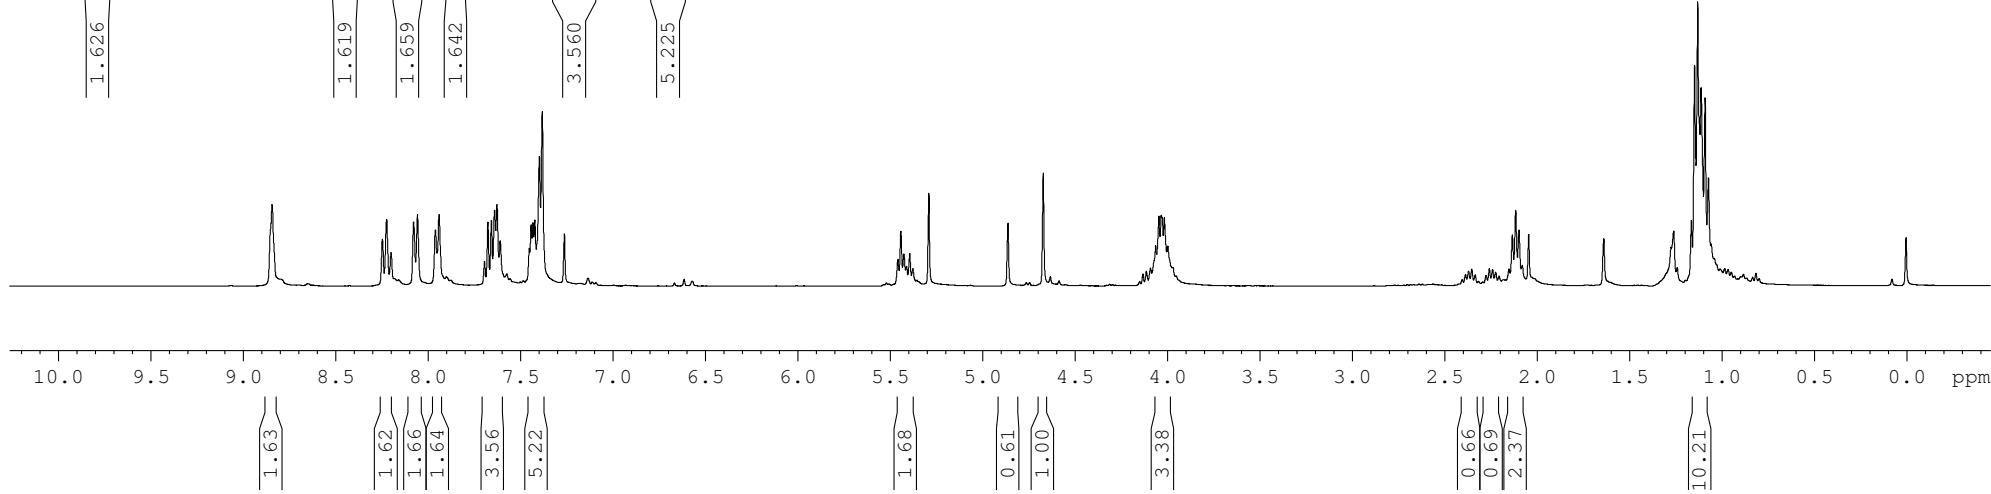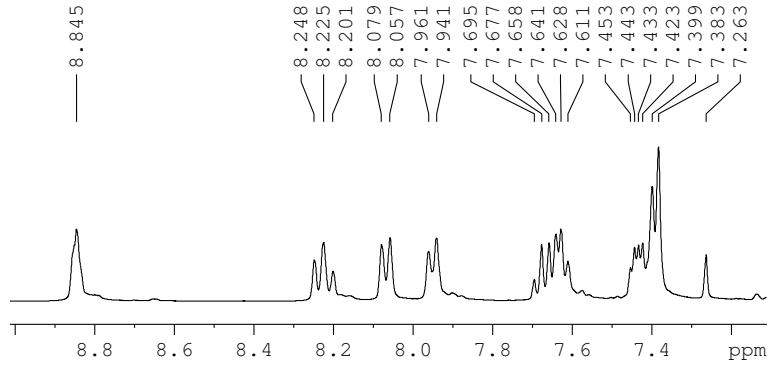

8.8449  
8.2483  
8.2245  
8.2014  
8.0792  
8.0575  
7.9607  
7.9407  
7.6950  
7.6766  
7.6580  
7.6408  
7.6284  
7.6107  
7.4532  
7.4329  
7.4329  
7.4225  
7.3988  
7.3826  
7.2628

5.4587  
5.4424  
5.4259  
5.4123  
5.3948  
5.3777  
5.2912  
4.8631  
4.6721  
4.6338  
4.1327  
4.1147  
4.0917  
4.0641  
4.0462  
4.0345  
4.0294  
4.0173  
3.9990  
3.9703  
3.9518  
2.3877  
2.3713  
2.3539  
2.3356  
2.2765  
2.2585  
2.2413  
2.2244  
2.1524  
2.1343  
2.1164  
2.0985  
2.0805  
2.0457  
1.6396  
1.2766  
1.2615  
1.2419  
1.1659  
1.1488  
1.1316  
1.1135  
1.0918  
1.0734  
1.0582  
1.0411  
1.0102  
0.9851  
0.9670  
0.9501  
0.8842  
0.8165

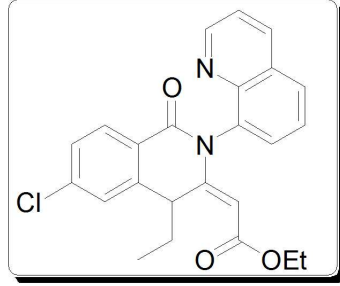

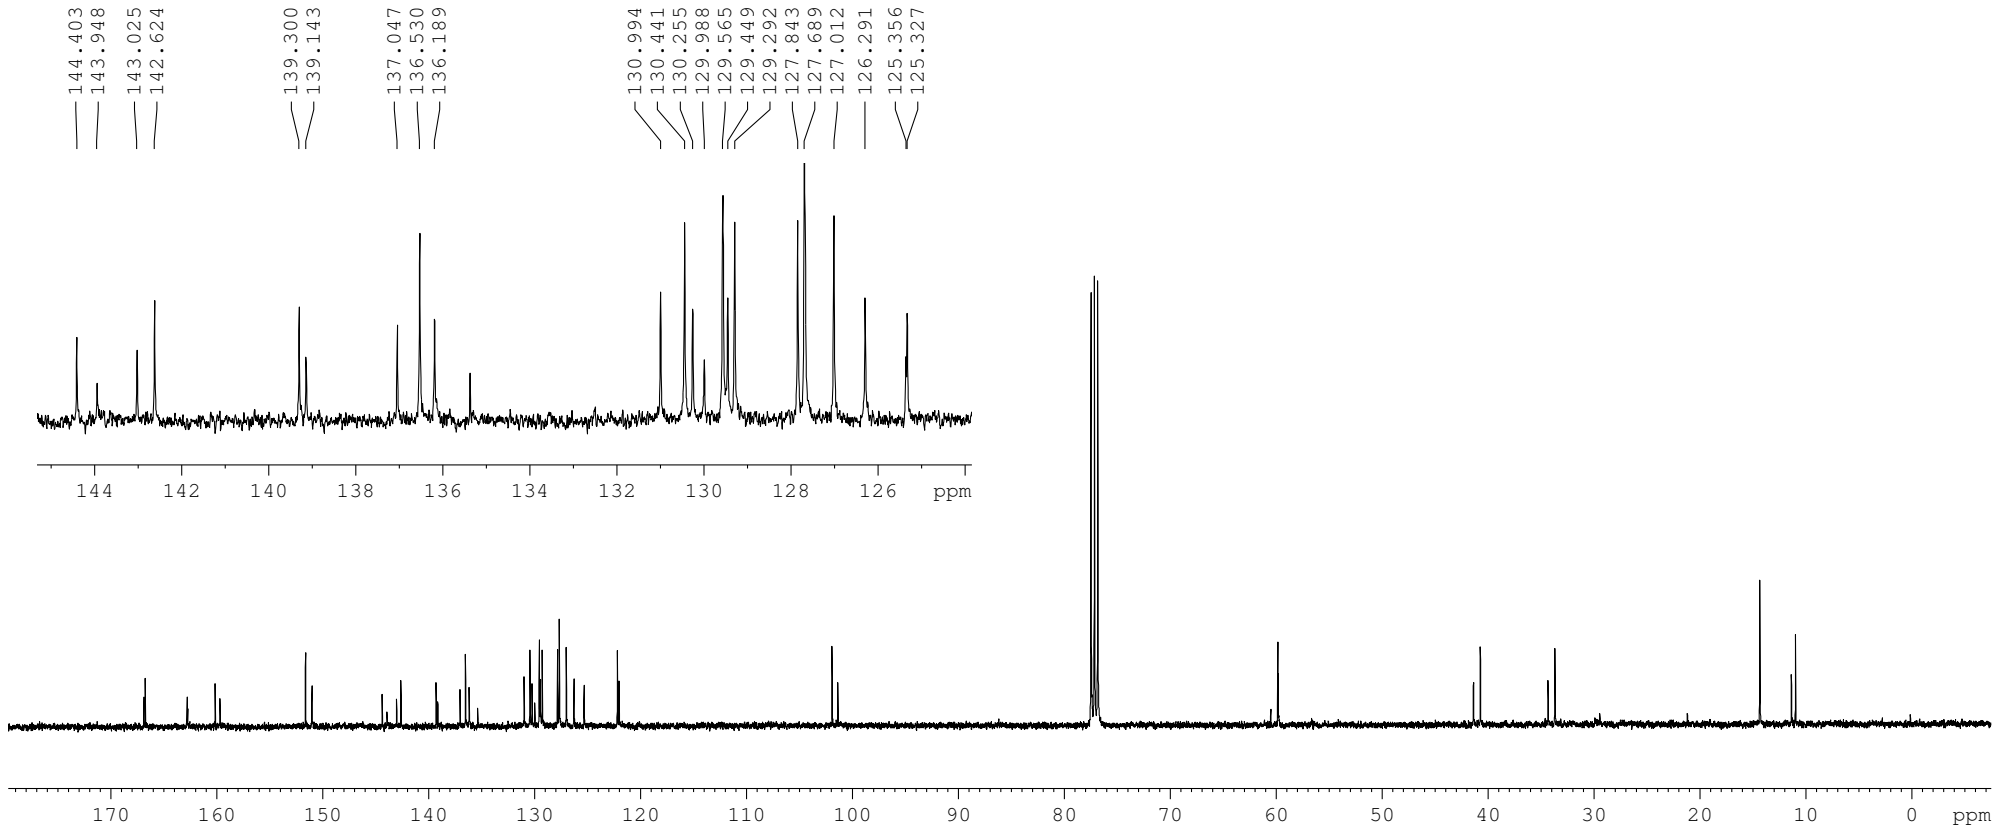

- 144.403
- 143.948
- 143.025
- 142.624
- 139.300
- 139.143
- 137.047
- 136.530
- 136.189
- 130.994
- 130.441
- 130.255
- 129.988
- 129.565
- 129.449
- 129.292
- 127.843
- 127.689
- 127.012
- 126.291
- 125.356
- 125.327

- 166.8373
- 166.7214
- 162.7606
- 162.6964
- 160.1180
- 159.6562
- 151.5855
- 150.9770
- 144.4030
- 143.9478
- 143.0255
- 142.6240
- 139.3002
- 139.1434
- 137.0467
- 136.5296
- 136.1894
- 130.9942
- 130.4413
- 130.2547
- 129.9883
- 129.5654
- 129.4491
- 129.2922
- 127.8429
- 127.6892
- 127.0116
- 126.2912
- 125.3556
- 125.3266
- 122.1927
- 122.0328
- 101.9260
- 101.3877

- 77.4784
- 77.1611
- 76.8429

- 59.8392
- 59.7997

- 41.3721
- 40.7195

- 34.3234
- 33.6791

- 14.3405
- 11.3504
- 10.9715

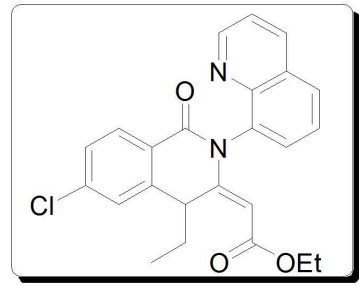

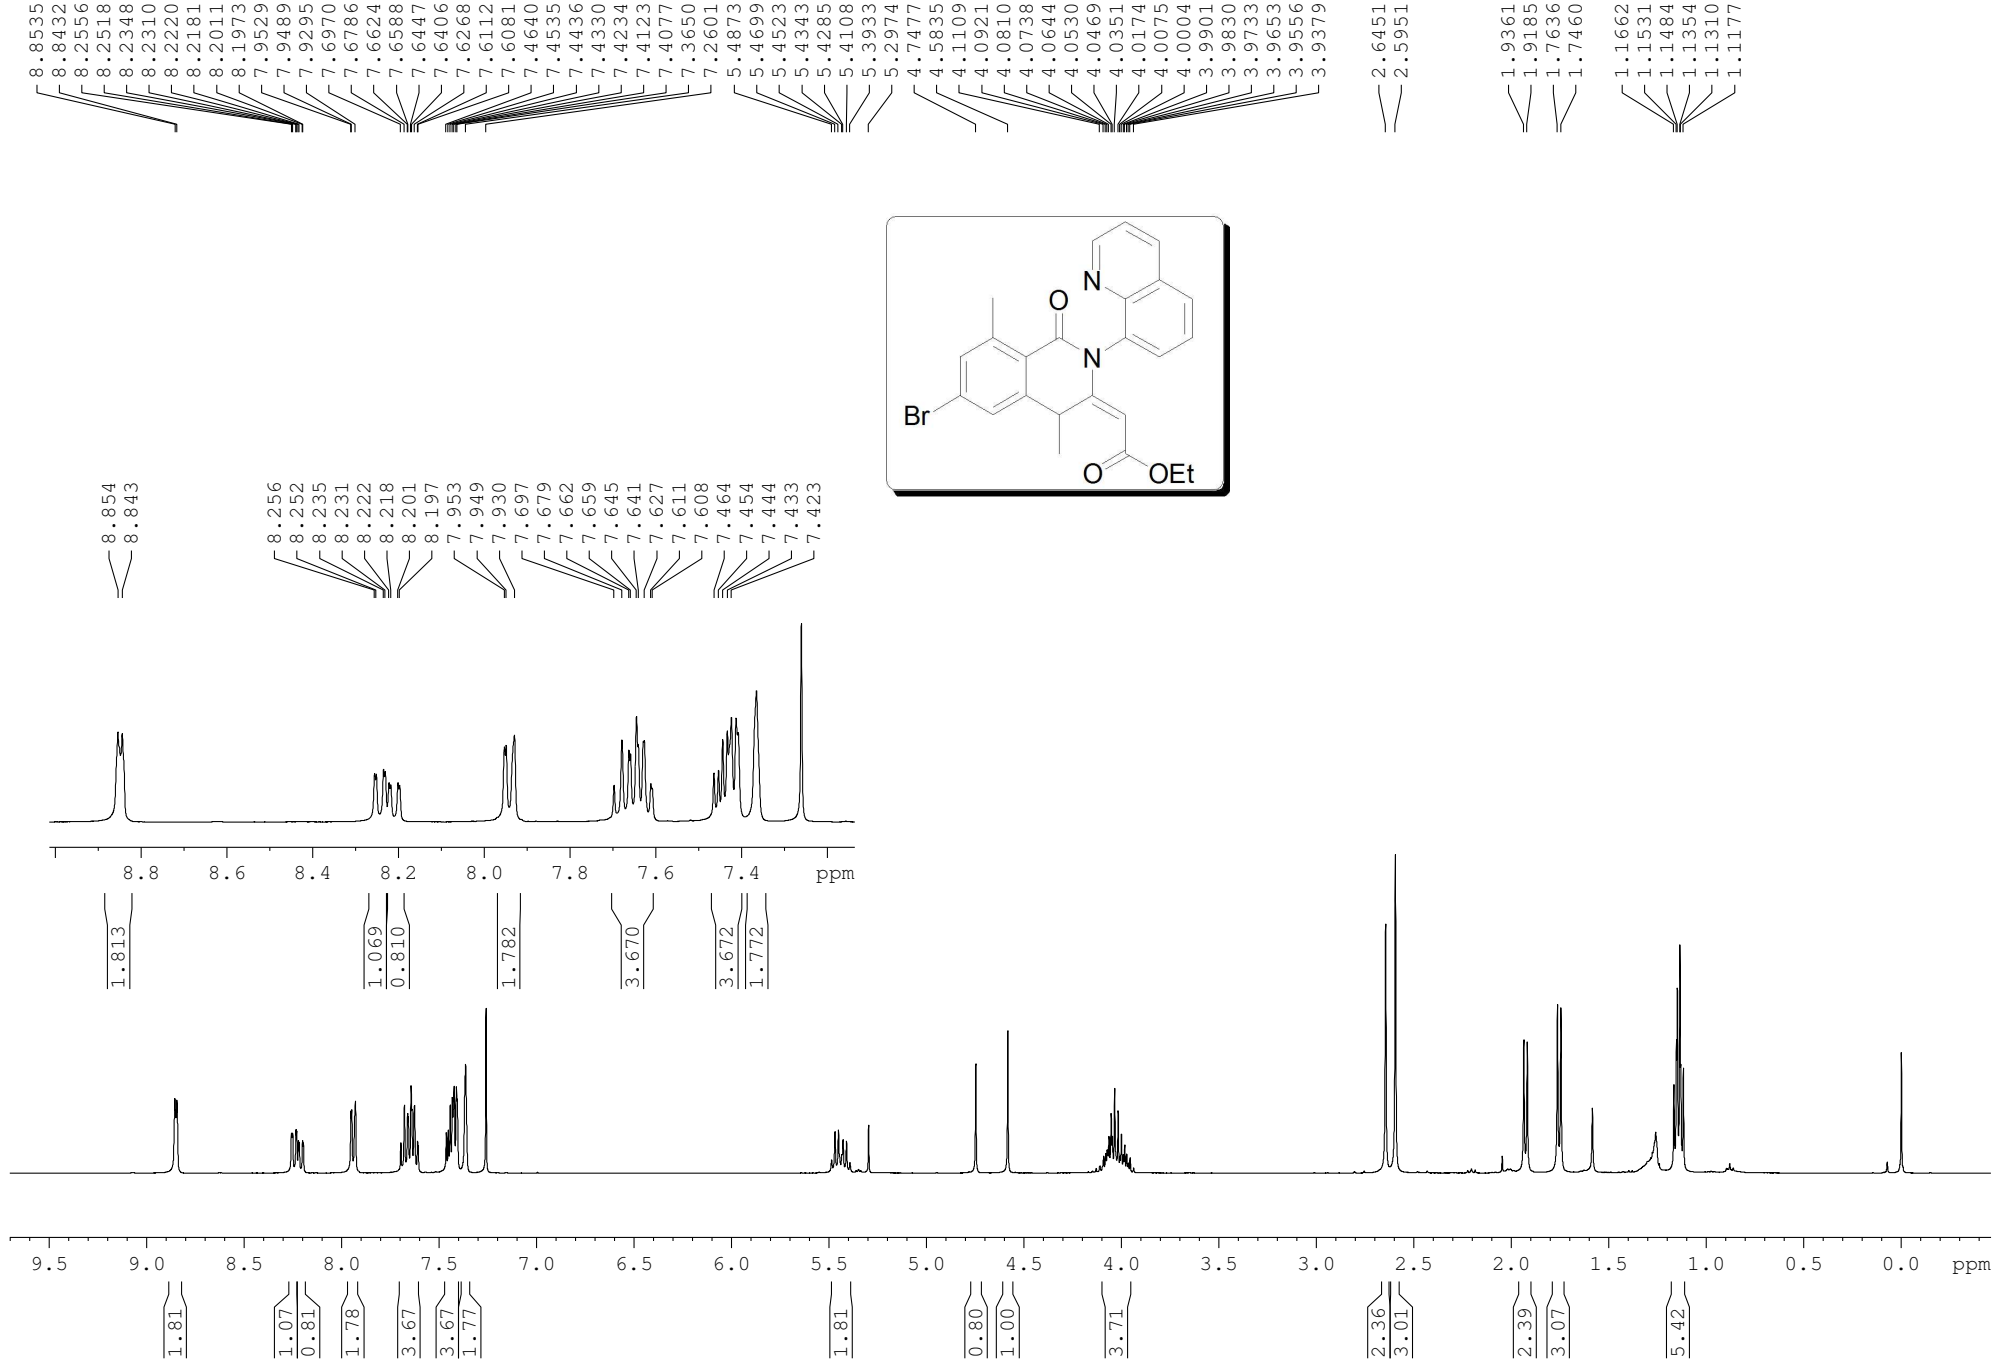

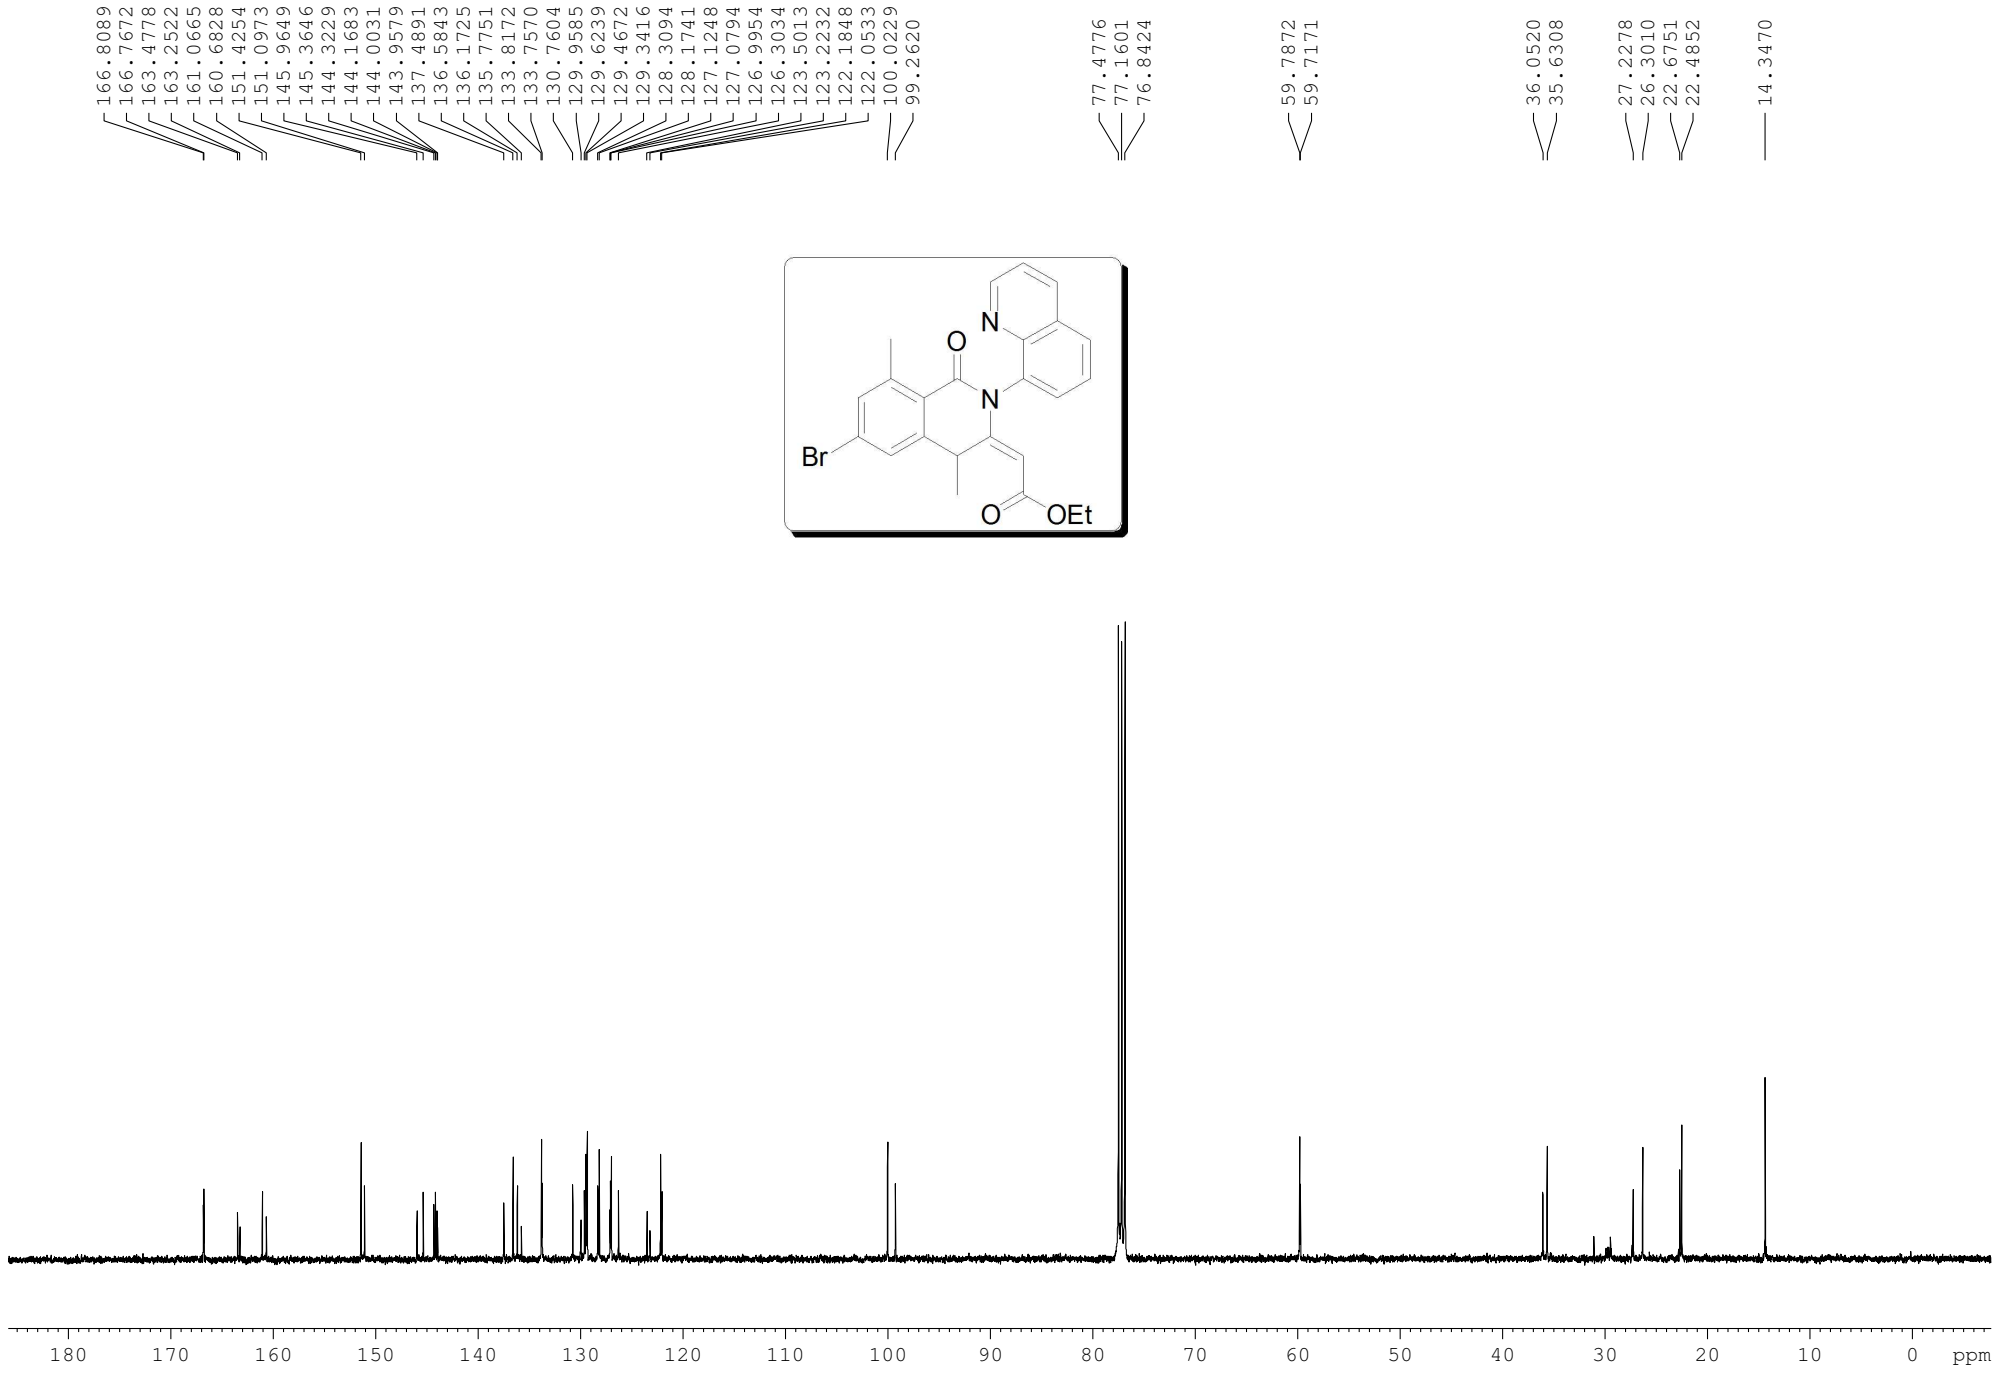

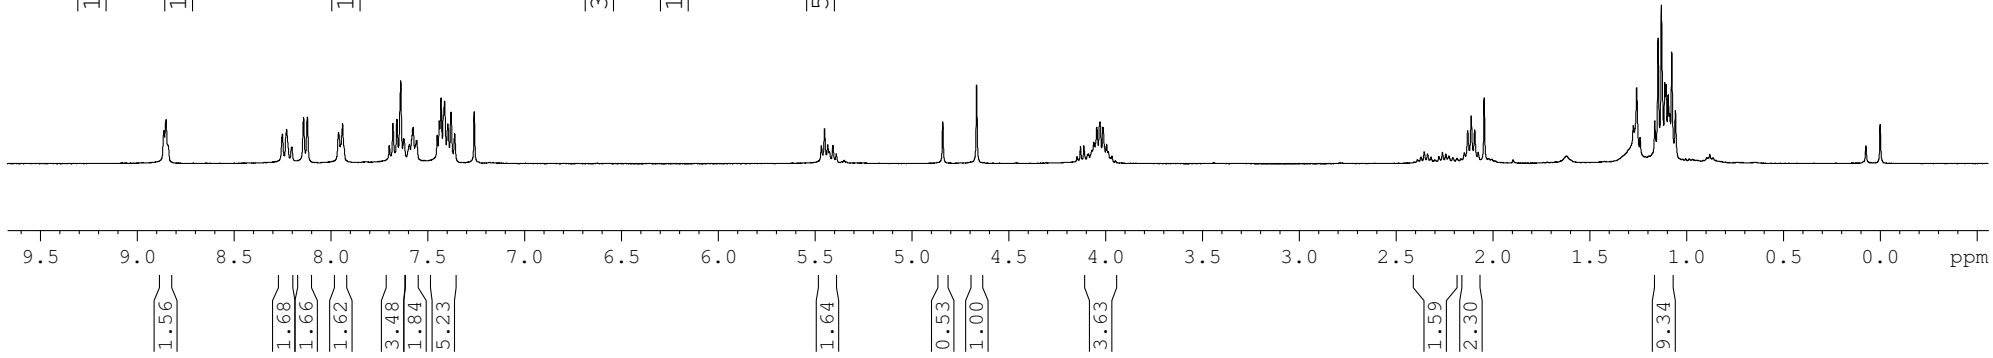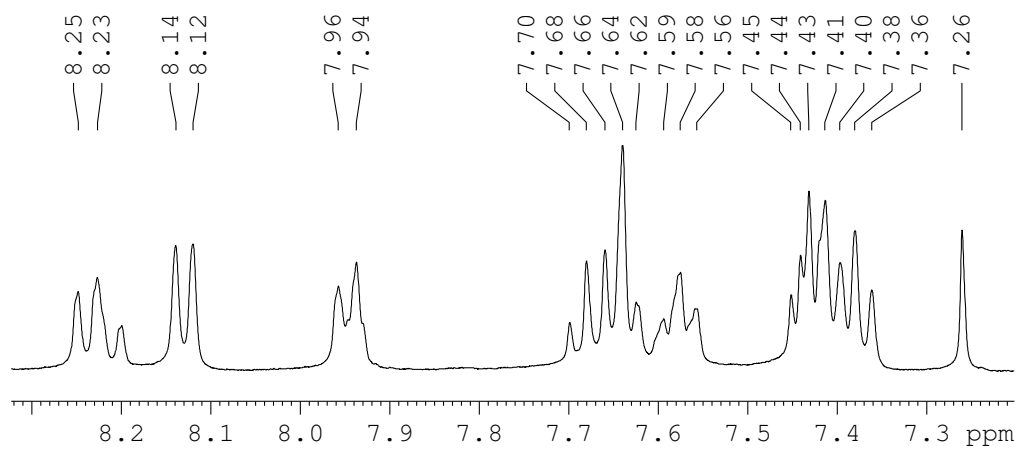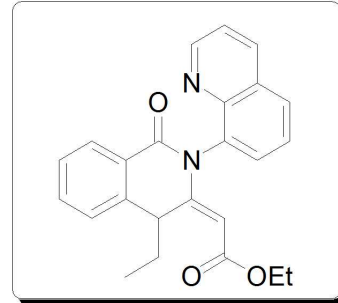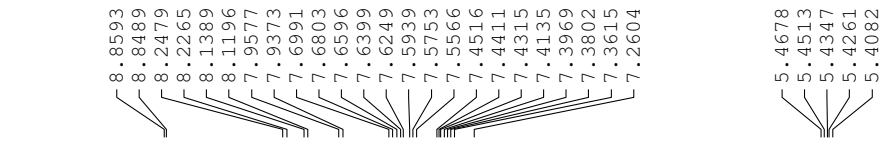





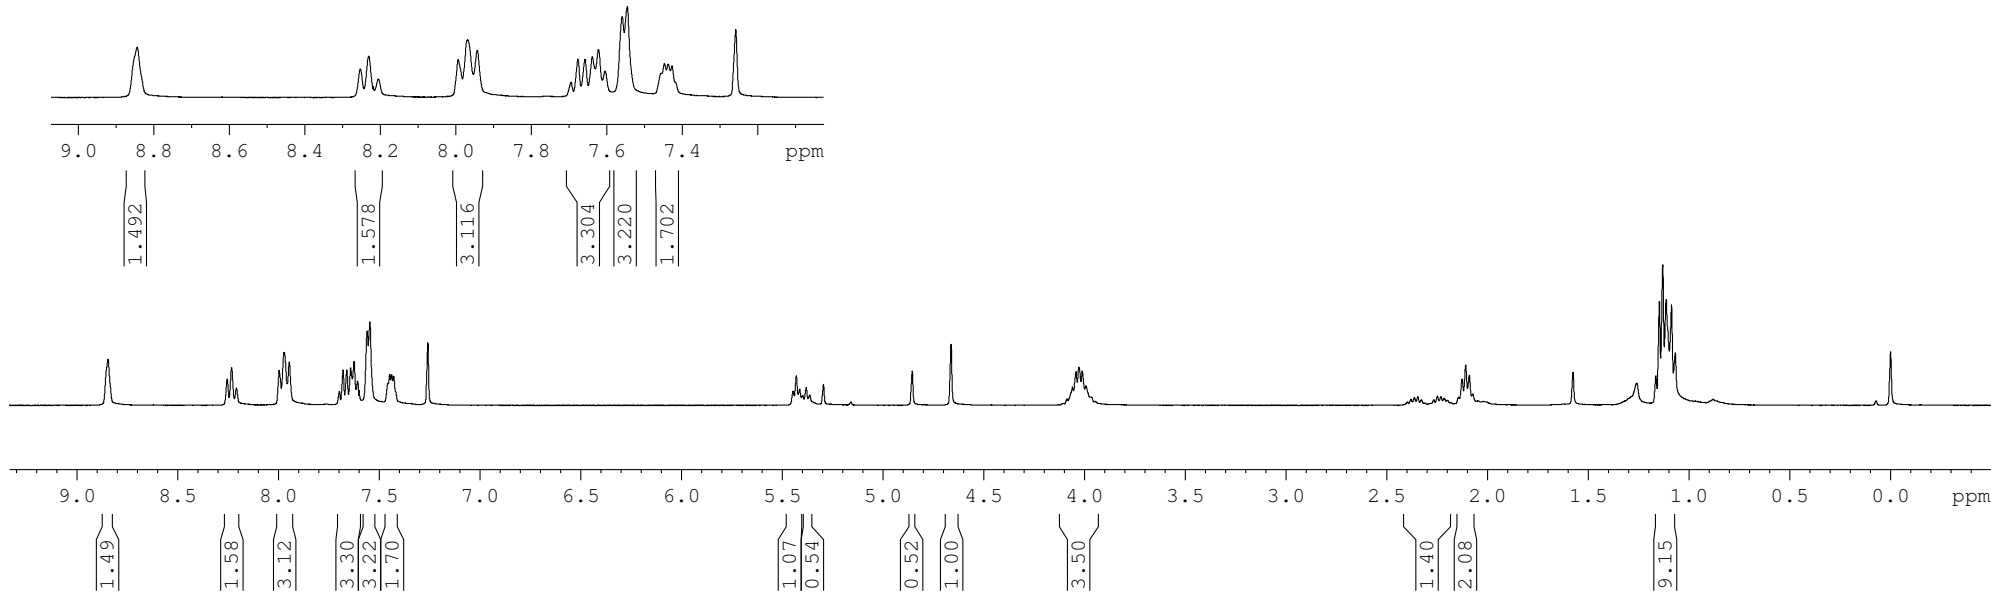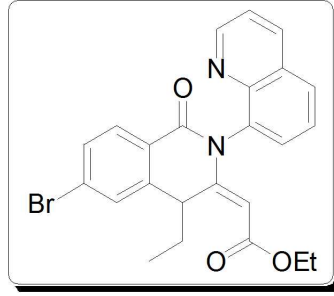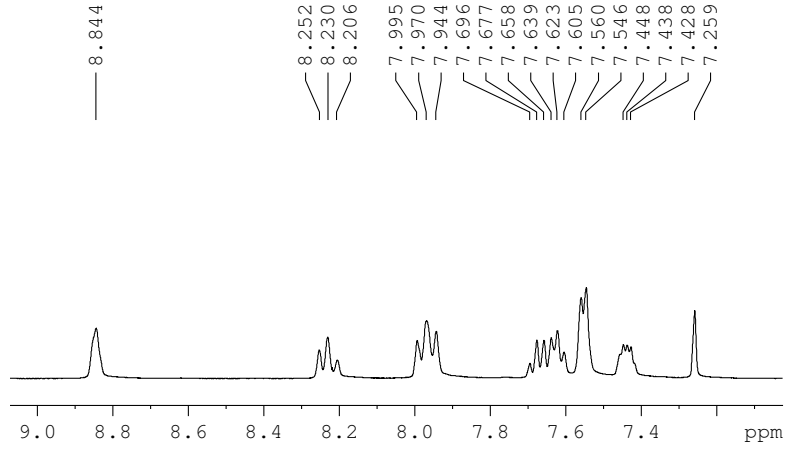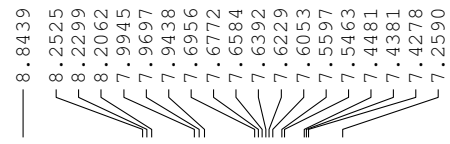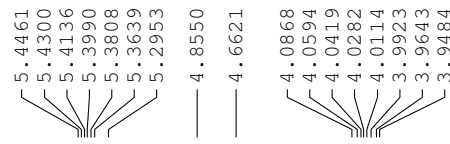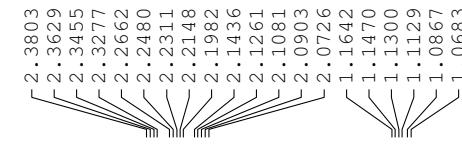

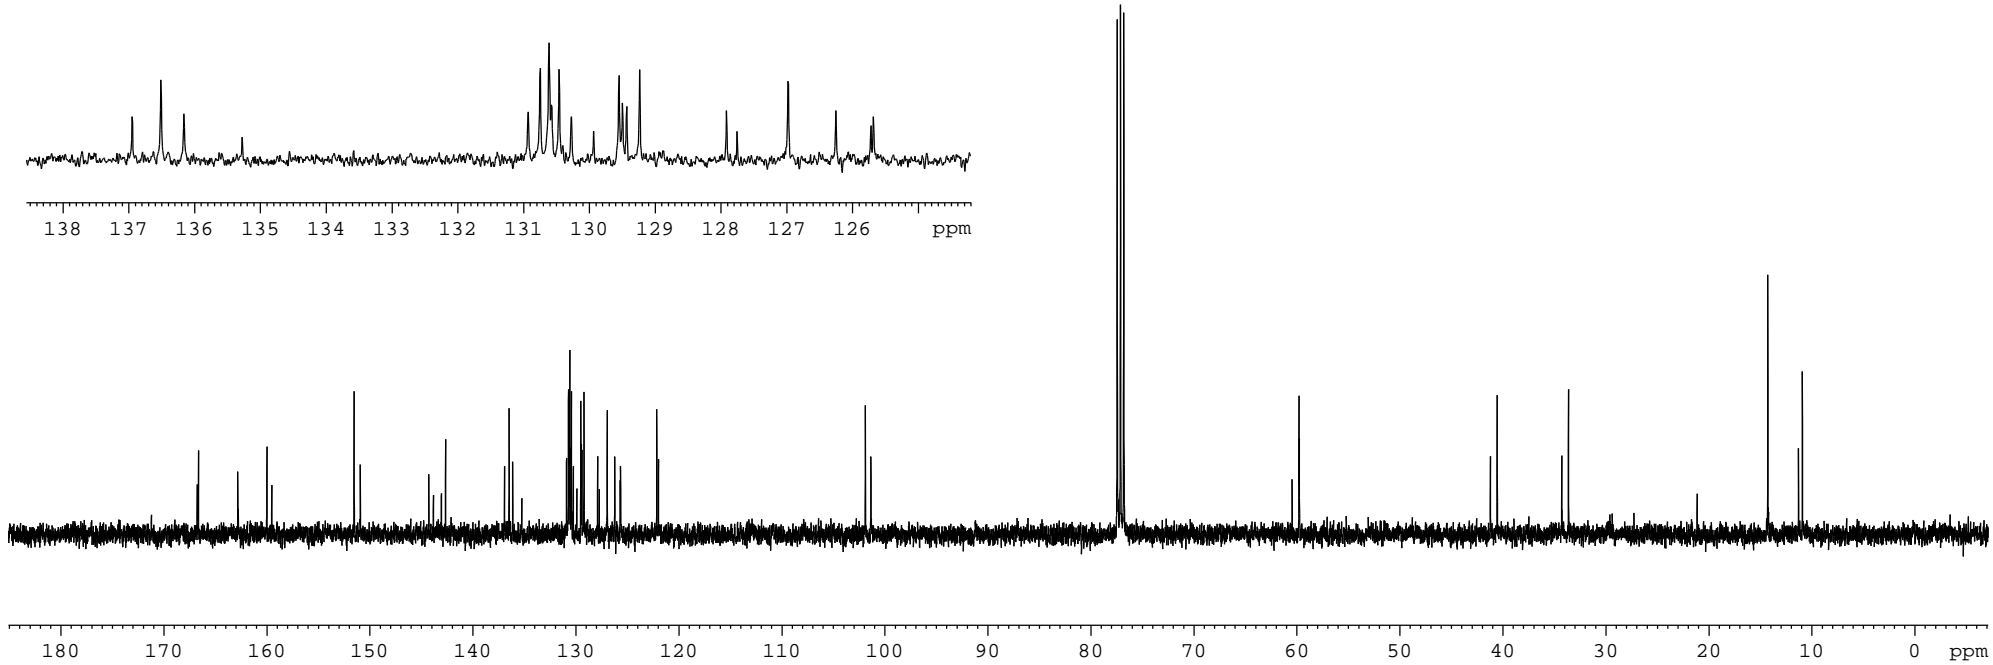

— 136.947  
 — 136.511  
 — 136.161  
 — 135.277

130.929  
 130.747  
 130.613  
 130.577  
 130.459  
 130.274  
 129.935  
 129.550  
 129.497  
 129.433  
 129.235  
 127.915  
 127.754  
 — 126.979  
 — 126.254  
 125.721  
 125.684

166.78  
 166.66  
 162.85  
 160.02  
 159.55  
 151.55  
 150.95  
 144.30  
 143.86  
 143.08  
 142.68  
 136.95  
 136.51  
 136.16  
 135.28  
 130.93  
 130.75  
 130.61  
 130.58  
 130.46  
 130.27  
 129.93  
 129.55  
 129.50  
 129.43  
 129.24  
 127.91  
 127.75  
 126.98  
 126.25  
 125.72  
 125.68  
 122.17  
 122.01  
 101.92  
 101.38

77.46  
 77.15  
 76.83

60.48  
 59.82  
 59.78

41.23  
 40.57

34.30  
 33.65

14.30  
 11.32  
 10.94

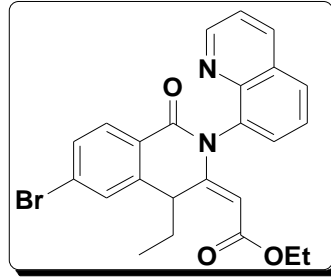

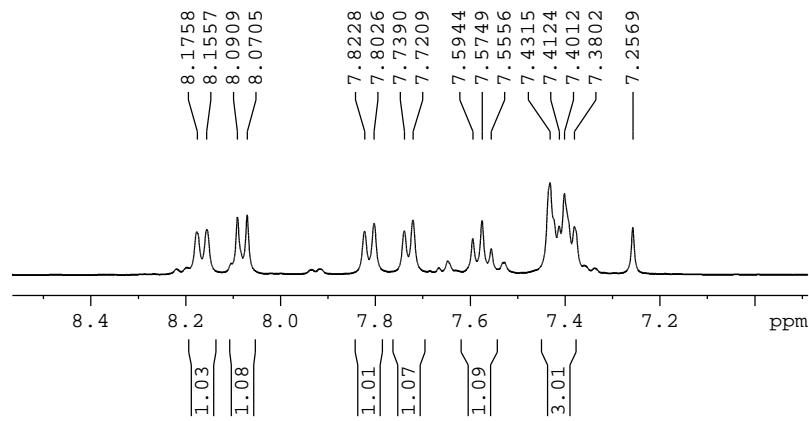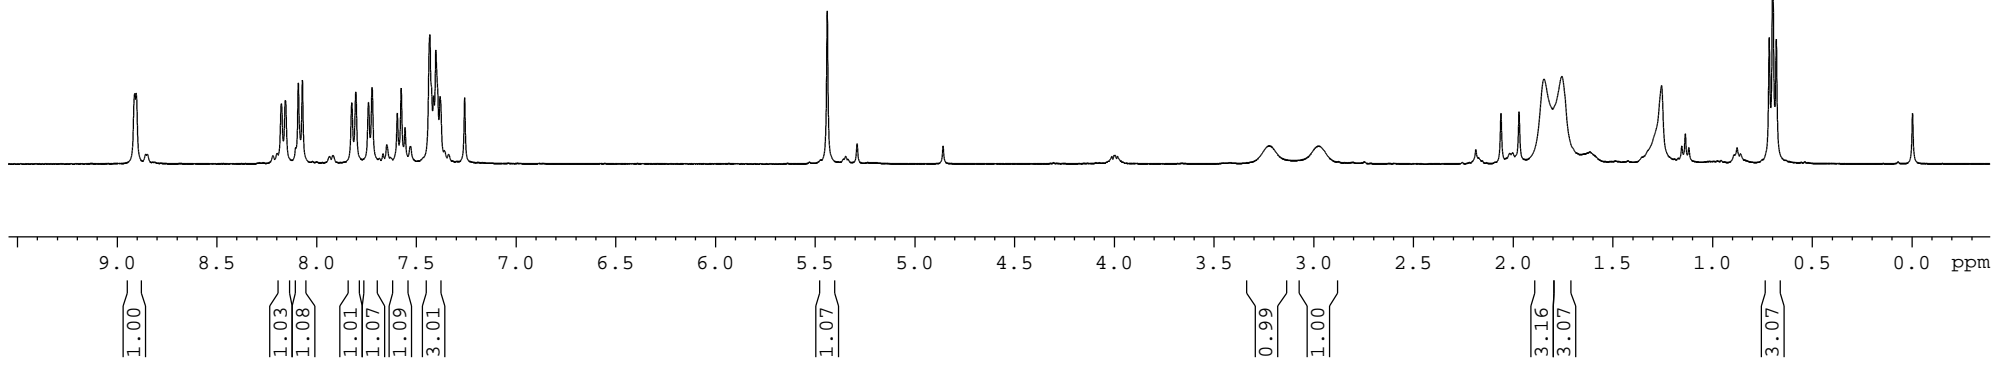

8.9114  
8.9047

8.1758  
8.1557  
8.0909  
8.0705  
7.8228  
7.8026  
7.7390  
7.7209  
7.5944  
7.5749  
7.5556  
7.4315  
7.4124  
7.4012  
7.3802  
7.2569

5.4385

3.2212  
2.9742

1.8443  
1.7547

0.7149  
0.6972  
0.6794

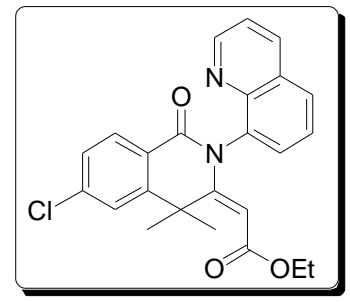

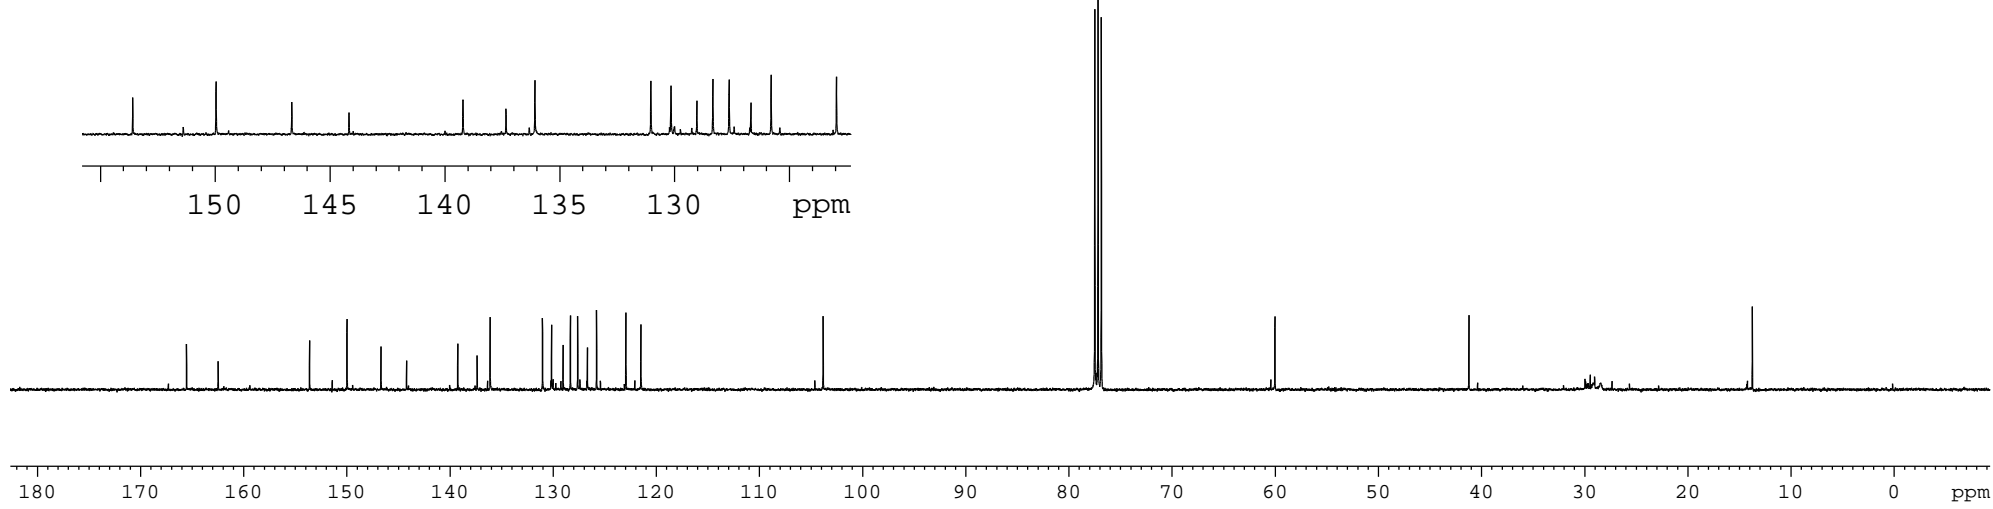

— 153.59  
 — 149.96  
 — 146.67  
 — 144.19  
 — 139.22  
 — 137.35  
 — 136.09  
 — 131.04  
 — 130.16  
 — 129.04  
 — 128.34  
 — 127.63  
 — 126.68  
 — 125.80

— 165.52  
 — 162.46  
 — 153.59  
 — 149.96  
 — 146.67  
 — 144.19  
 — 139.22  
 — 137.35  
 — 136.09  
 — 131.04  
 — 130.16  
 — 129.04  
 — 128.34  
 — 127.63  
 — 126.68  
 — 125.80  
 — 122.96  
 — 121.50

— 103.83

77.49  
 77.18  
 76.86

— 60.03

— 41.22

— 13.74

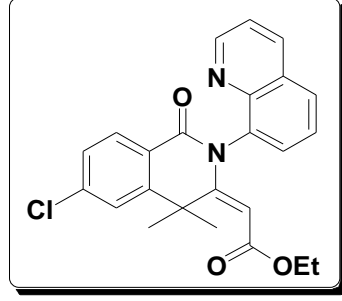

8.9050  
8.9010  
8.2495  
8.2298  
8.1968  
8.1930  
8.1760  
8.1723  
7.8491  
7.8465  
7.8287  
7.8261  
7.7442  
7.7350  
7.7320  
7.7263  
7.7230  
7.7164  
7.7134  
7.7066  
7.7033  
7.6068  
7.5872  
7.5678  
7.4443  
7.4340  
7.4235  
7.4133  
7.2563

5.4793

3.2260

2.9834

1.8743

1.7800

0.7146

0.6968

0.6789

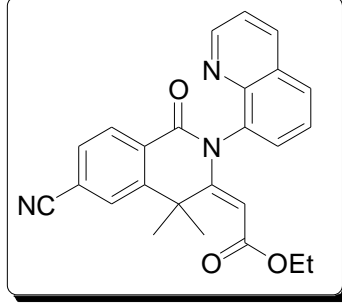

8.915  
8.911  
8.905  
8.901

8.249  
8.230  
8.197  
8.193  
8.176  
8.172  
7.849  
7.846  
7.829  
7.826  
7.744  
7.735  
7.732  
7.726  
7.723  
7.716  
7.713  
7.707  
7.703  
7.607  
7.587  
7.568  
7.444  
7.434  
7.423

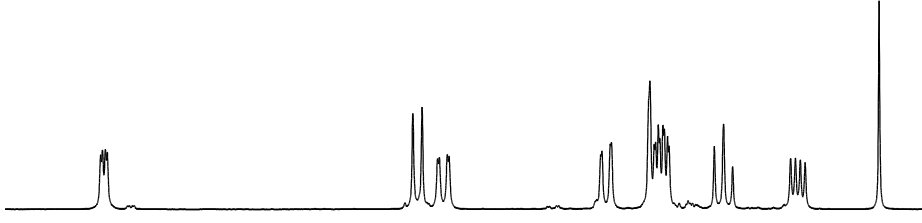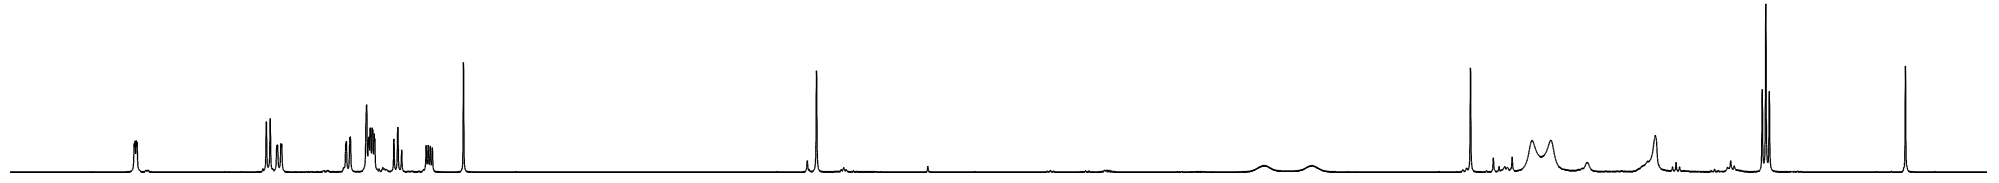

1.00

1.06  
1.03

1.06  
3.05  
1.01  
1.07

1.01

0.97  
1.05

6.13

3.03

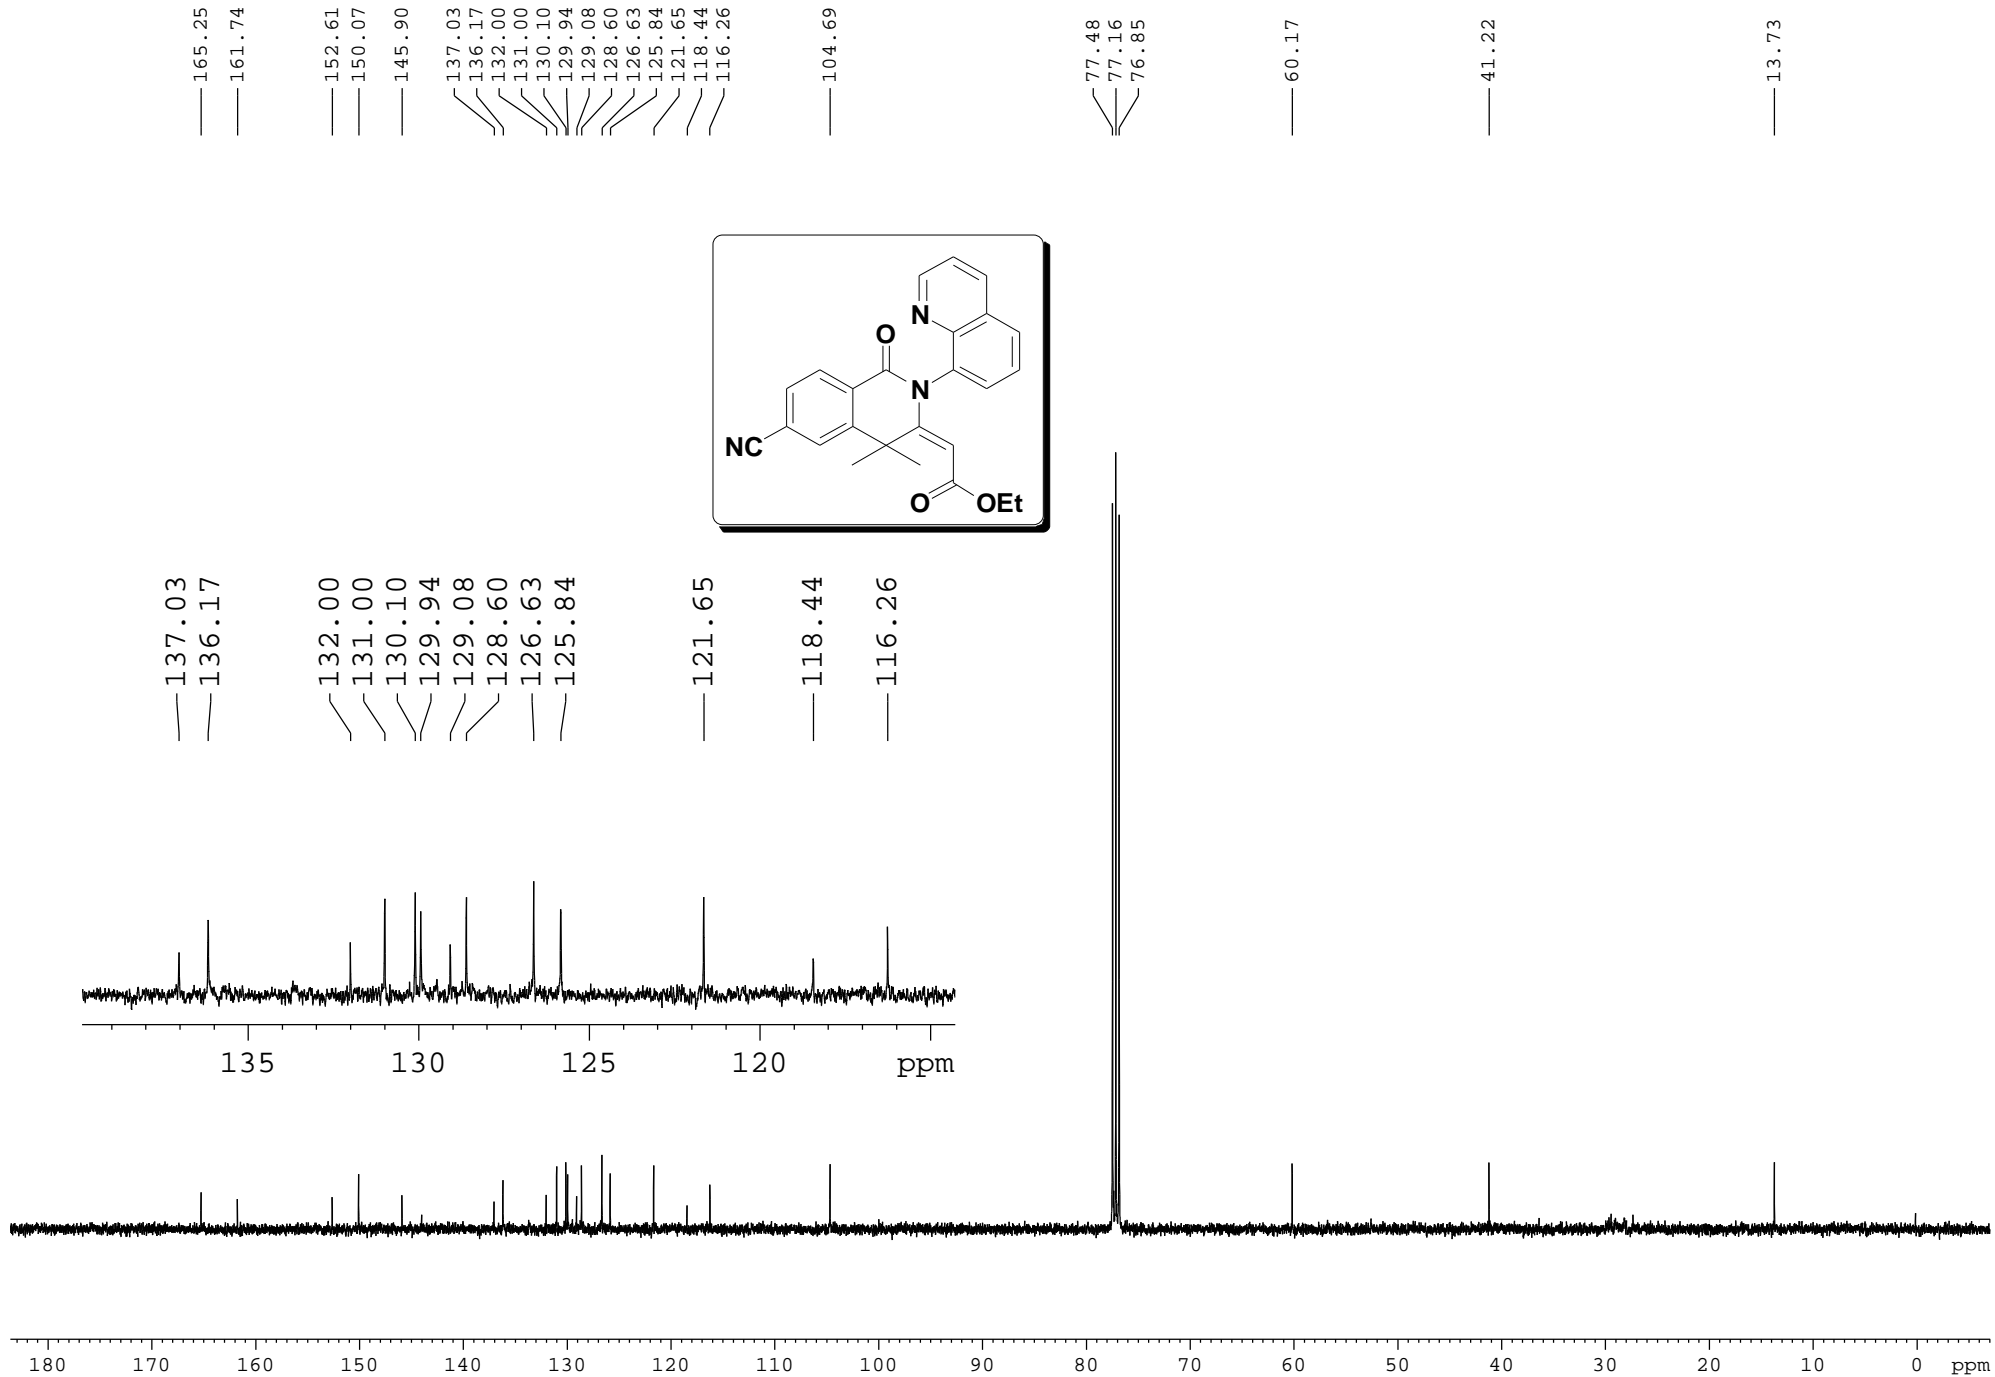

8.9221  
8.9187  
8.9122  
8.9085  
8.2312  
8.2282  
8.2106  
8.2075  
8.0543  
8.0335  
7.8712  
7.8507  
7.8359  
7.8180  
7.7761  
7.7726  
7.6443  
7.6247  
7.6054  
7.5222  
7.5182  
7.5013  
7.4975  
7.4483  
7.4379  
7.4277  
7.4173  
7.2543  
6.5032  
6.4820  
6.4607

5.3420  
5.3284  
5.2911

2.5928  
2.5732  
2.5579  
2.5421  
2.5388  
2.5226  
2.3377  
2.3137  
2.2841  
2.2800  
2.2531  
2.1839  
2.1680  
2.0618  
2.0397  
2.0284  
2.0138  
1.9983  
1.9827  
1.8723  
1.8538  
1.8341  
1.8268  
1.8152  
1.8006  
1.7474  
1.7340  
1.6711  
1.6649  
1.6133  
1.5216  
1.3527  
1.2926  
1.2469  
1.2109  
1.1808  
1.1691  
1.1594  
1.1471  
1.1362  
1.1250

8.231  
8.228  
8.211  
8.207

8.054  
8.034

7.871  
7.851  
7.836  
7.818  
7.776  
7.773

7.644  
7.625  
7.605  
7.522  
7.518  
7.501  
7.497  
7.448  
7.438  
7.428  
7.417

7.254

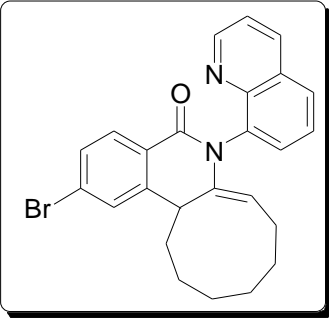

8.3 8.2 8.1 8.0 7.9 7.8 7.7 7.6 7.5 7.4 7.3 ppm

1.037  
0.949  
2.098  
0.982  
1.107  
1.181  
1.082

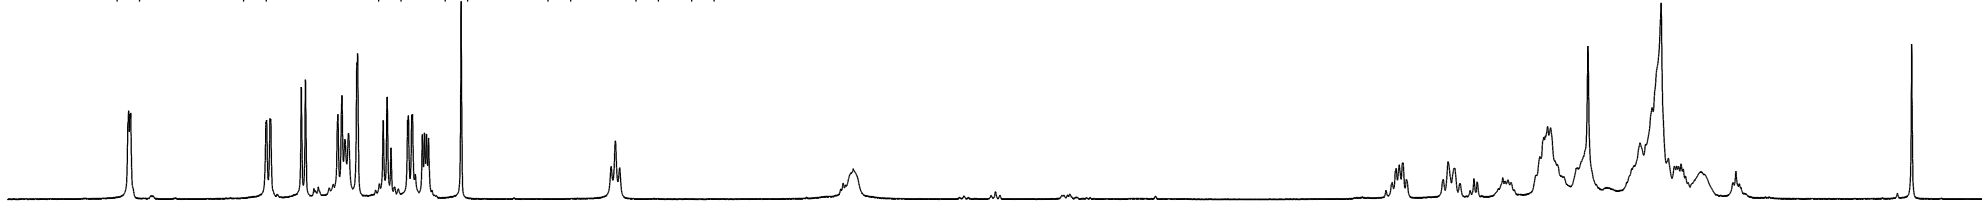

9.0 8.5 8.0 7.5 7.0 6.5 6.0 5.5 5.0 4.5 4.0 3.5 3.0 2.5 2.0 1.5 1.0 0.5 0.0 ppm

1.00  
1.04  
0.95  
2.10  
0.98  
1.11  
1.18  
1.08  
0.95  
1.01  
1.03  
1.05  
1.05  
3.49  
1.46  
10.31

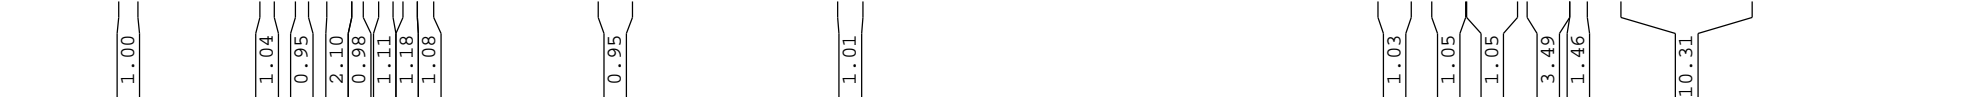



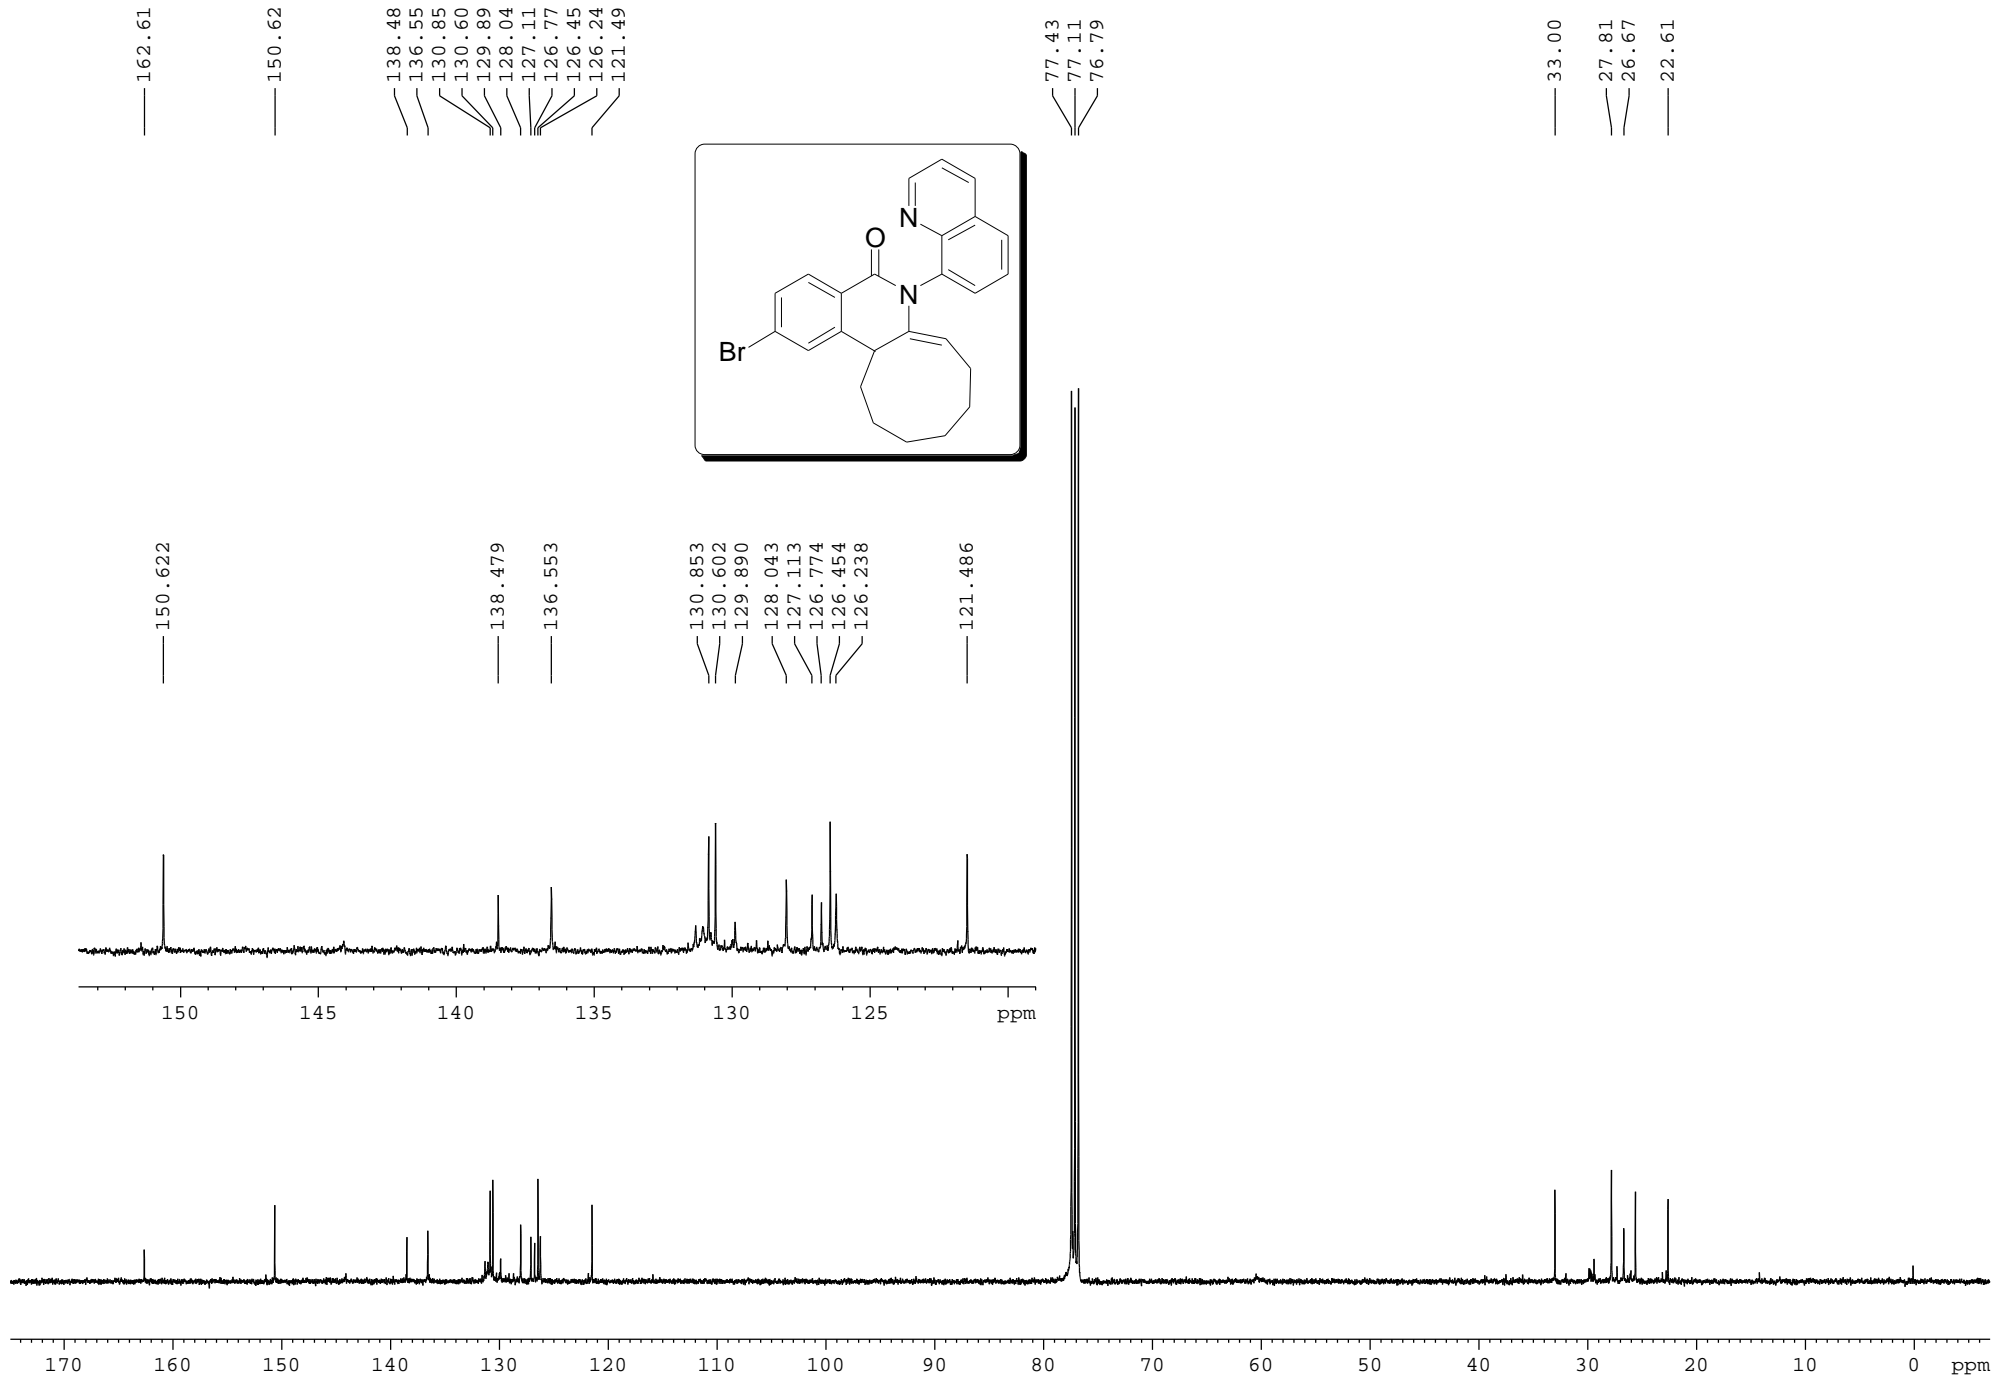

8.4079  
8.3885  
8.2292  
8.2251  
8.2084  
8.2043  
7.9163  
7.9133  
7.8957  
7.8926  
7.6775  
7.6600  
7.6109  
7.6077  
7.5926  
7.5895  
7.5661  
7.5465  
7.4887  
7.4823  
7.4690  
7.4499  
7.4398  
7.4293  
7.4190  
7.4085  
7.3352  
7.3289  
7.3191  
7.2594  
7.1801  
7.1748  
7.1655  
7.1565  
6.6340

4.9317  
4.9013  
4.8910  
4.8606

3.4367  
3.3942  
3.1406  
3.0982

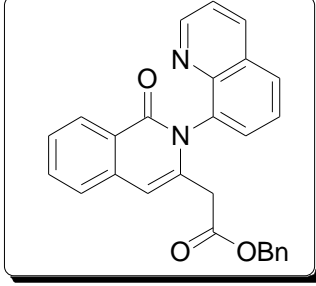

8.408  
8.389

8.229  
8.225  
8.208  
8.204

7.916  
7.913  
7.896  
7.893  
7.678  
7.660  
7.611  
7.608  
7.593  
7.590  
7.566  
7.547  
7.489  
7.482  
7.469  
7.450  
7.440  
7.429  
7.419  
7.409  
7.335  
7.329  
7.319  
7.259  
7.180  
7.175  
7.165

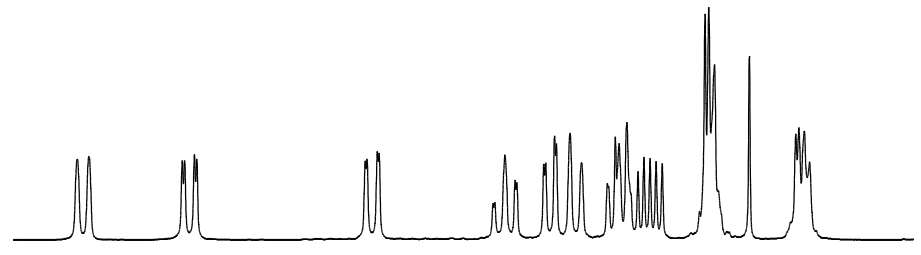

0.993  
1.048  
1.038  
1.099  
1.048  
1.063  
3.134  
3.051  
2.024

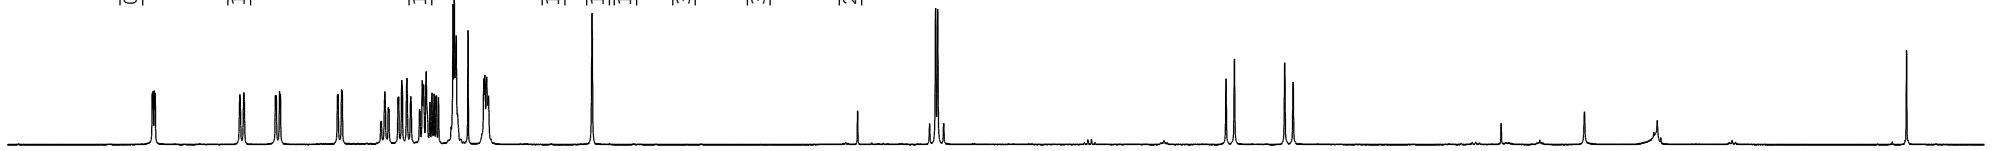

1.00  
0.99  
1.05  
1.04  
1.10  
1.05  
1.06  
3.13  
3.05  
2.02  
1.01  
2.08  
1.02  
1.03

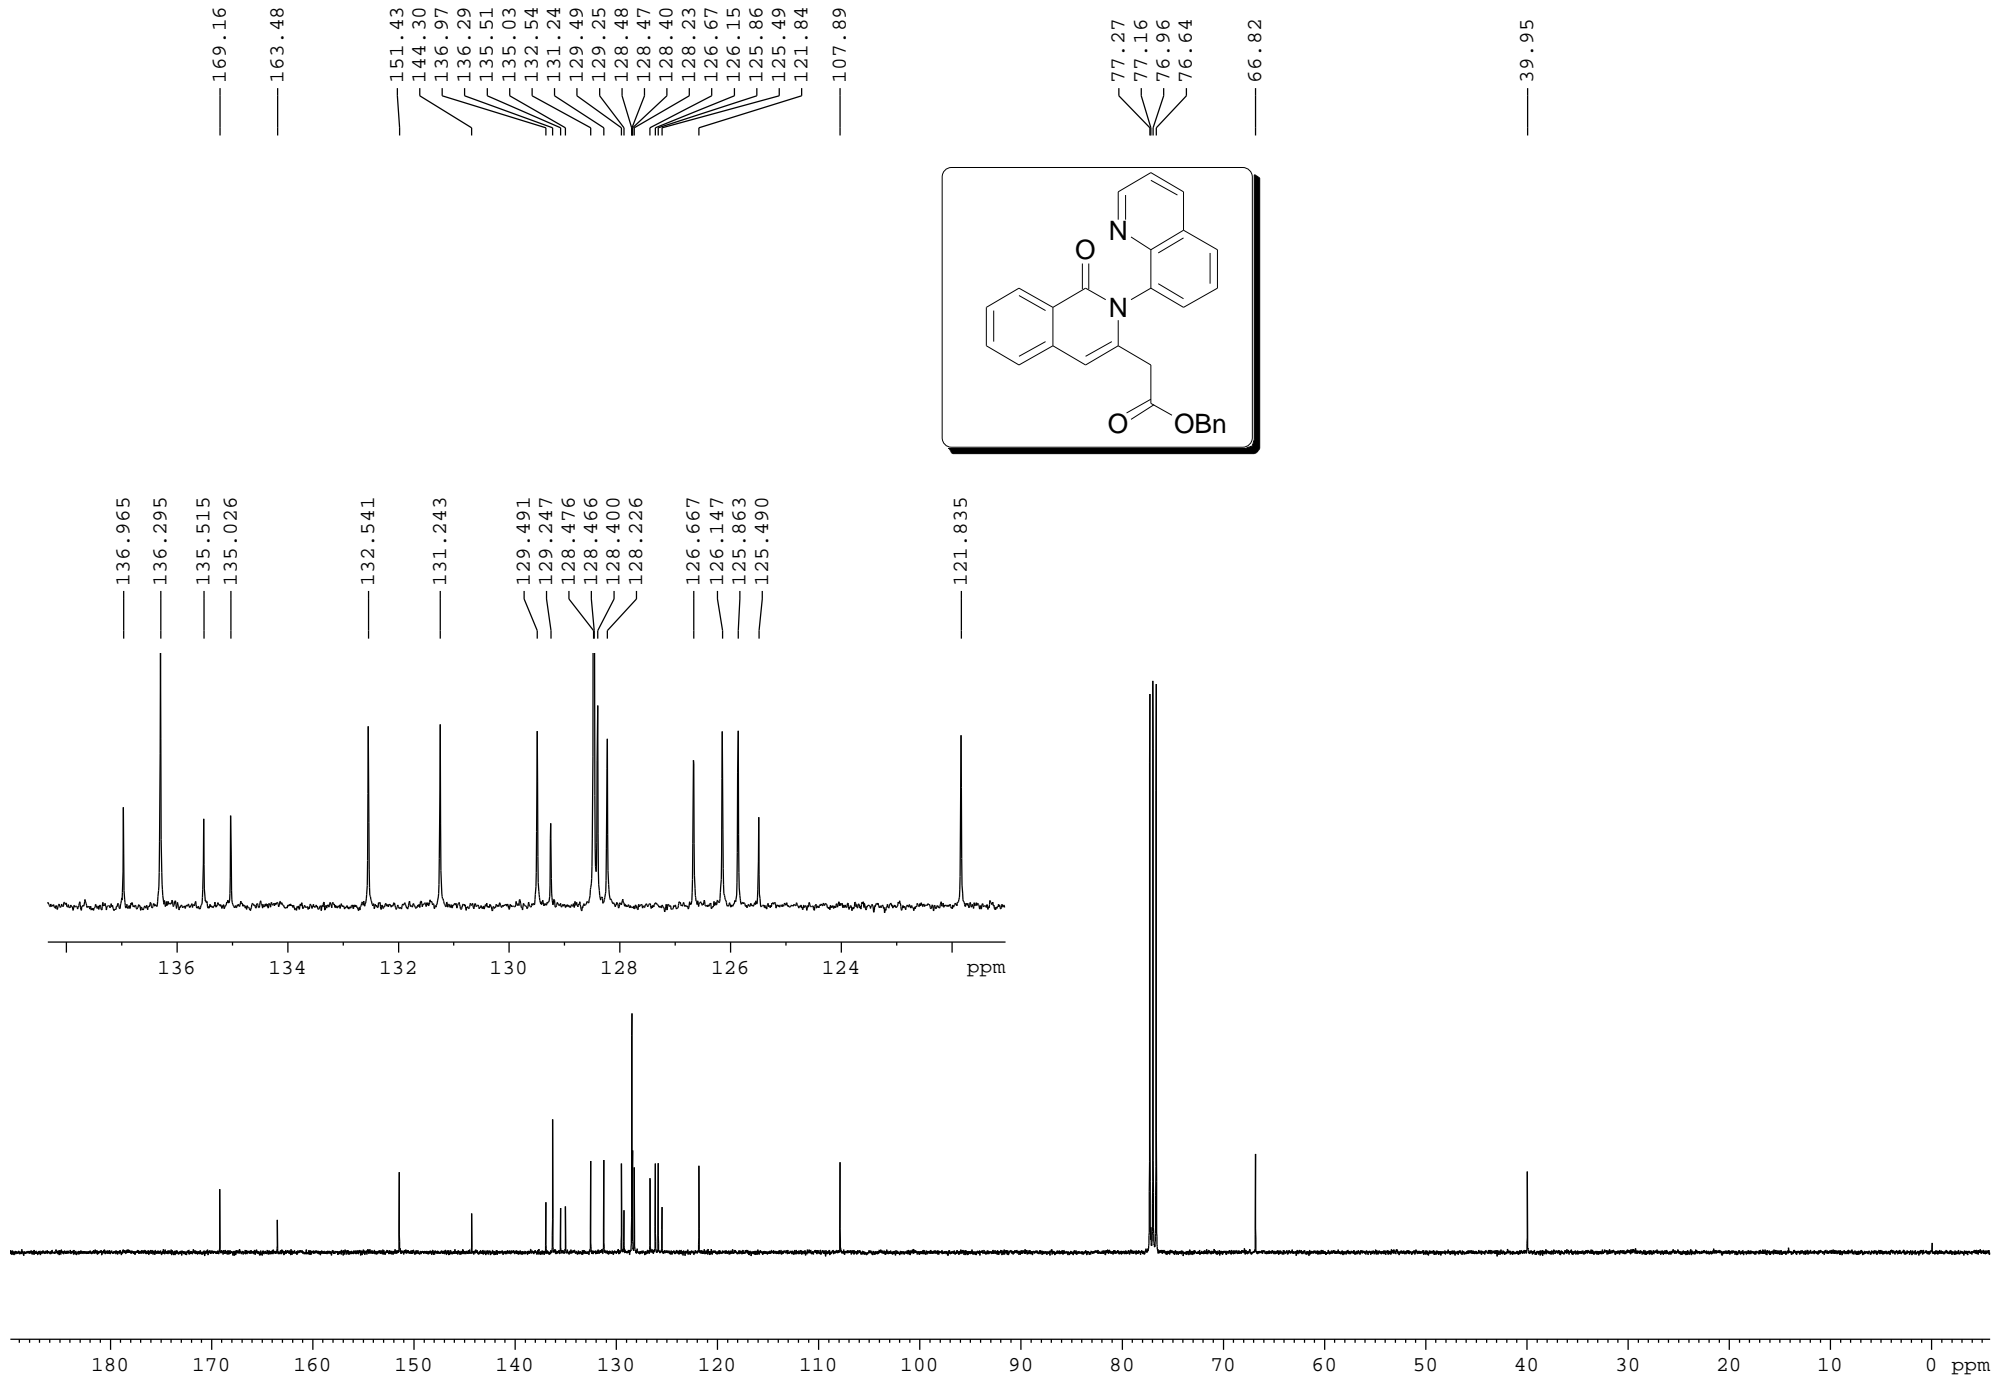

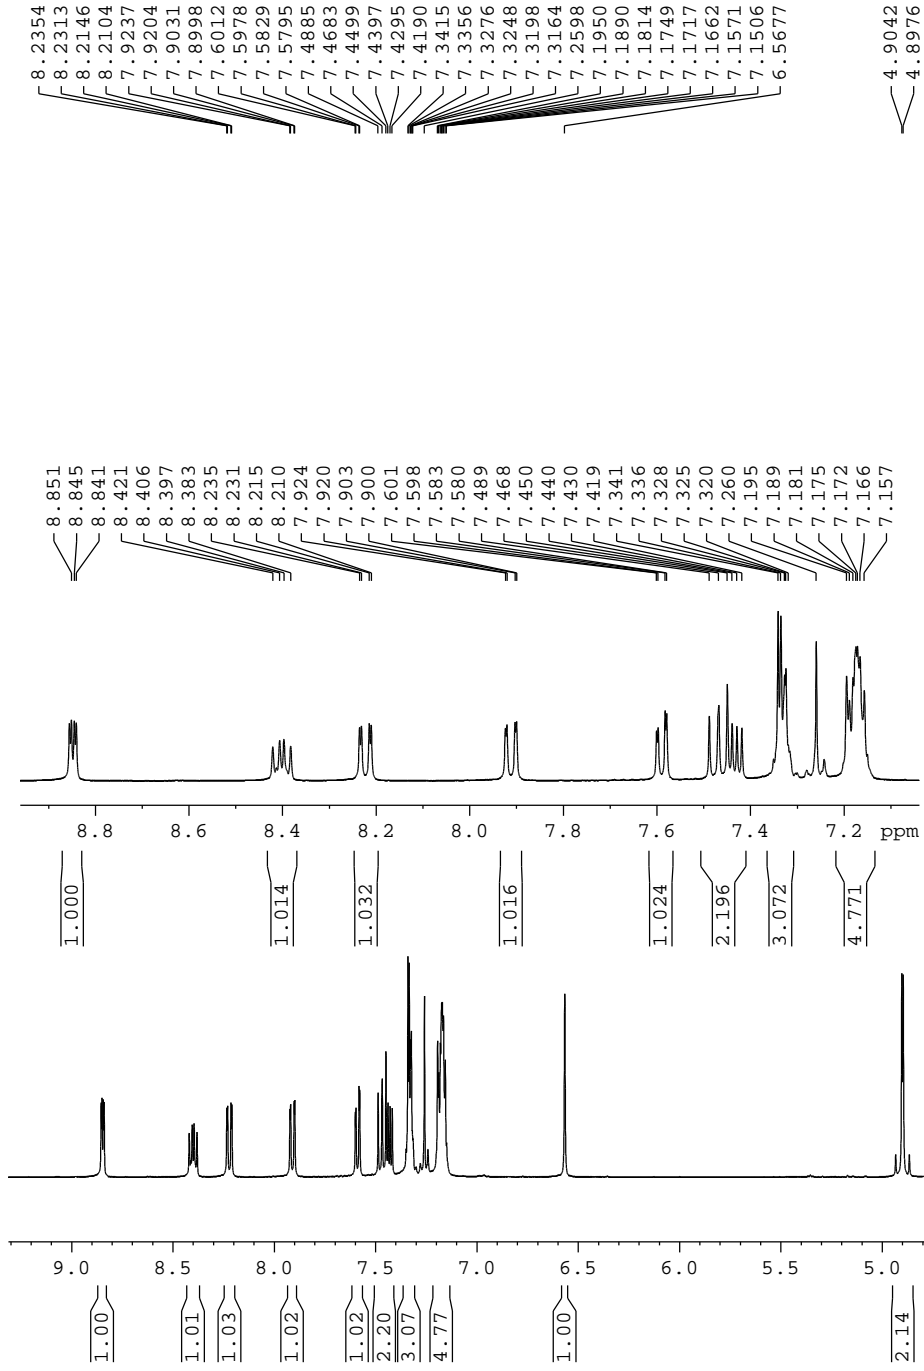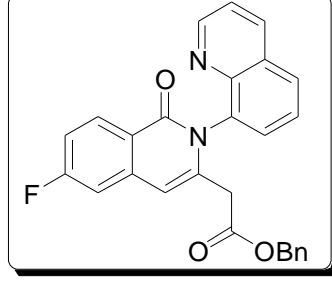

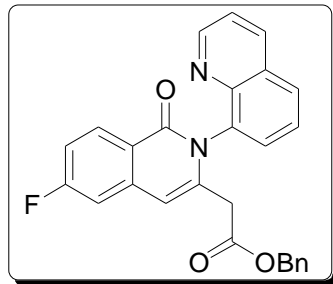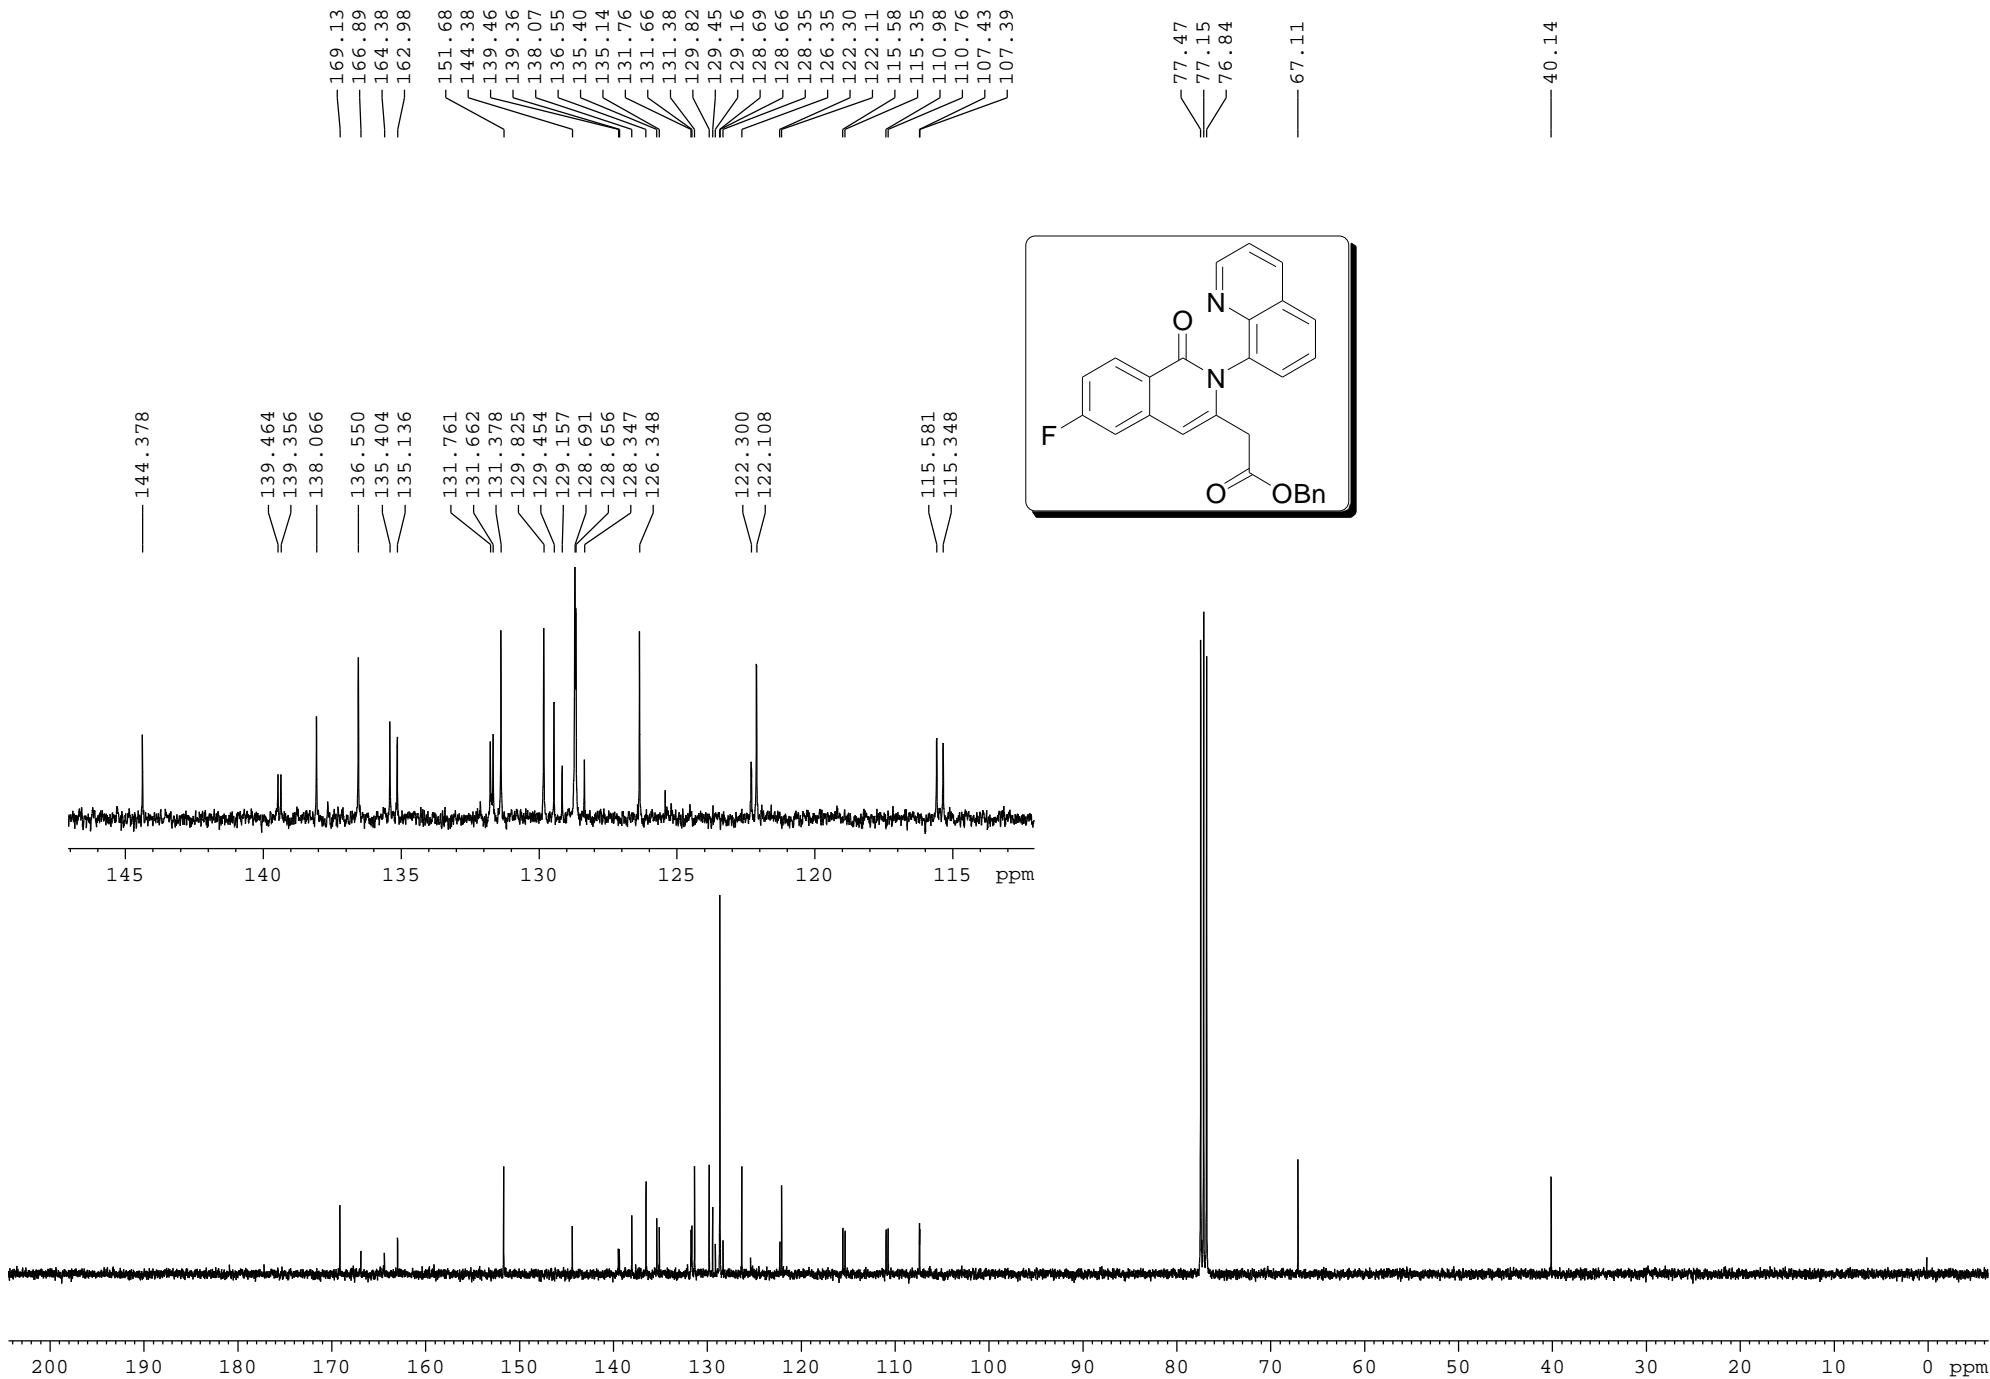

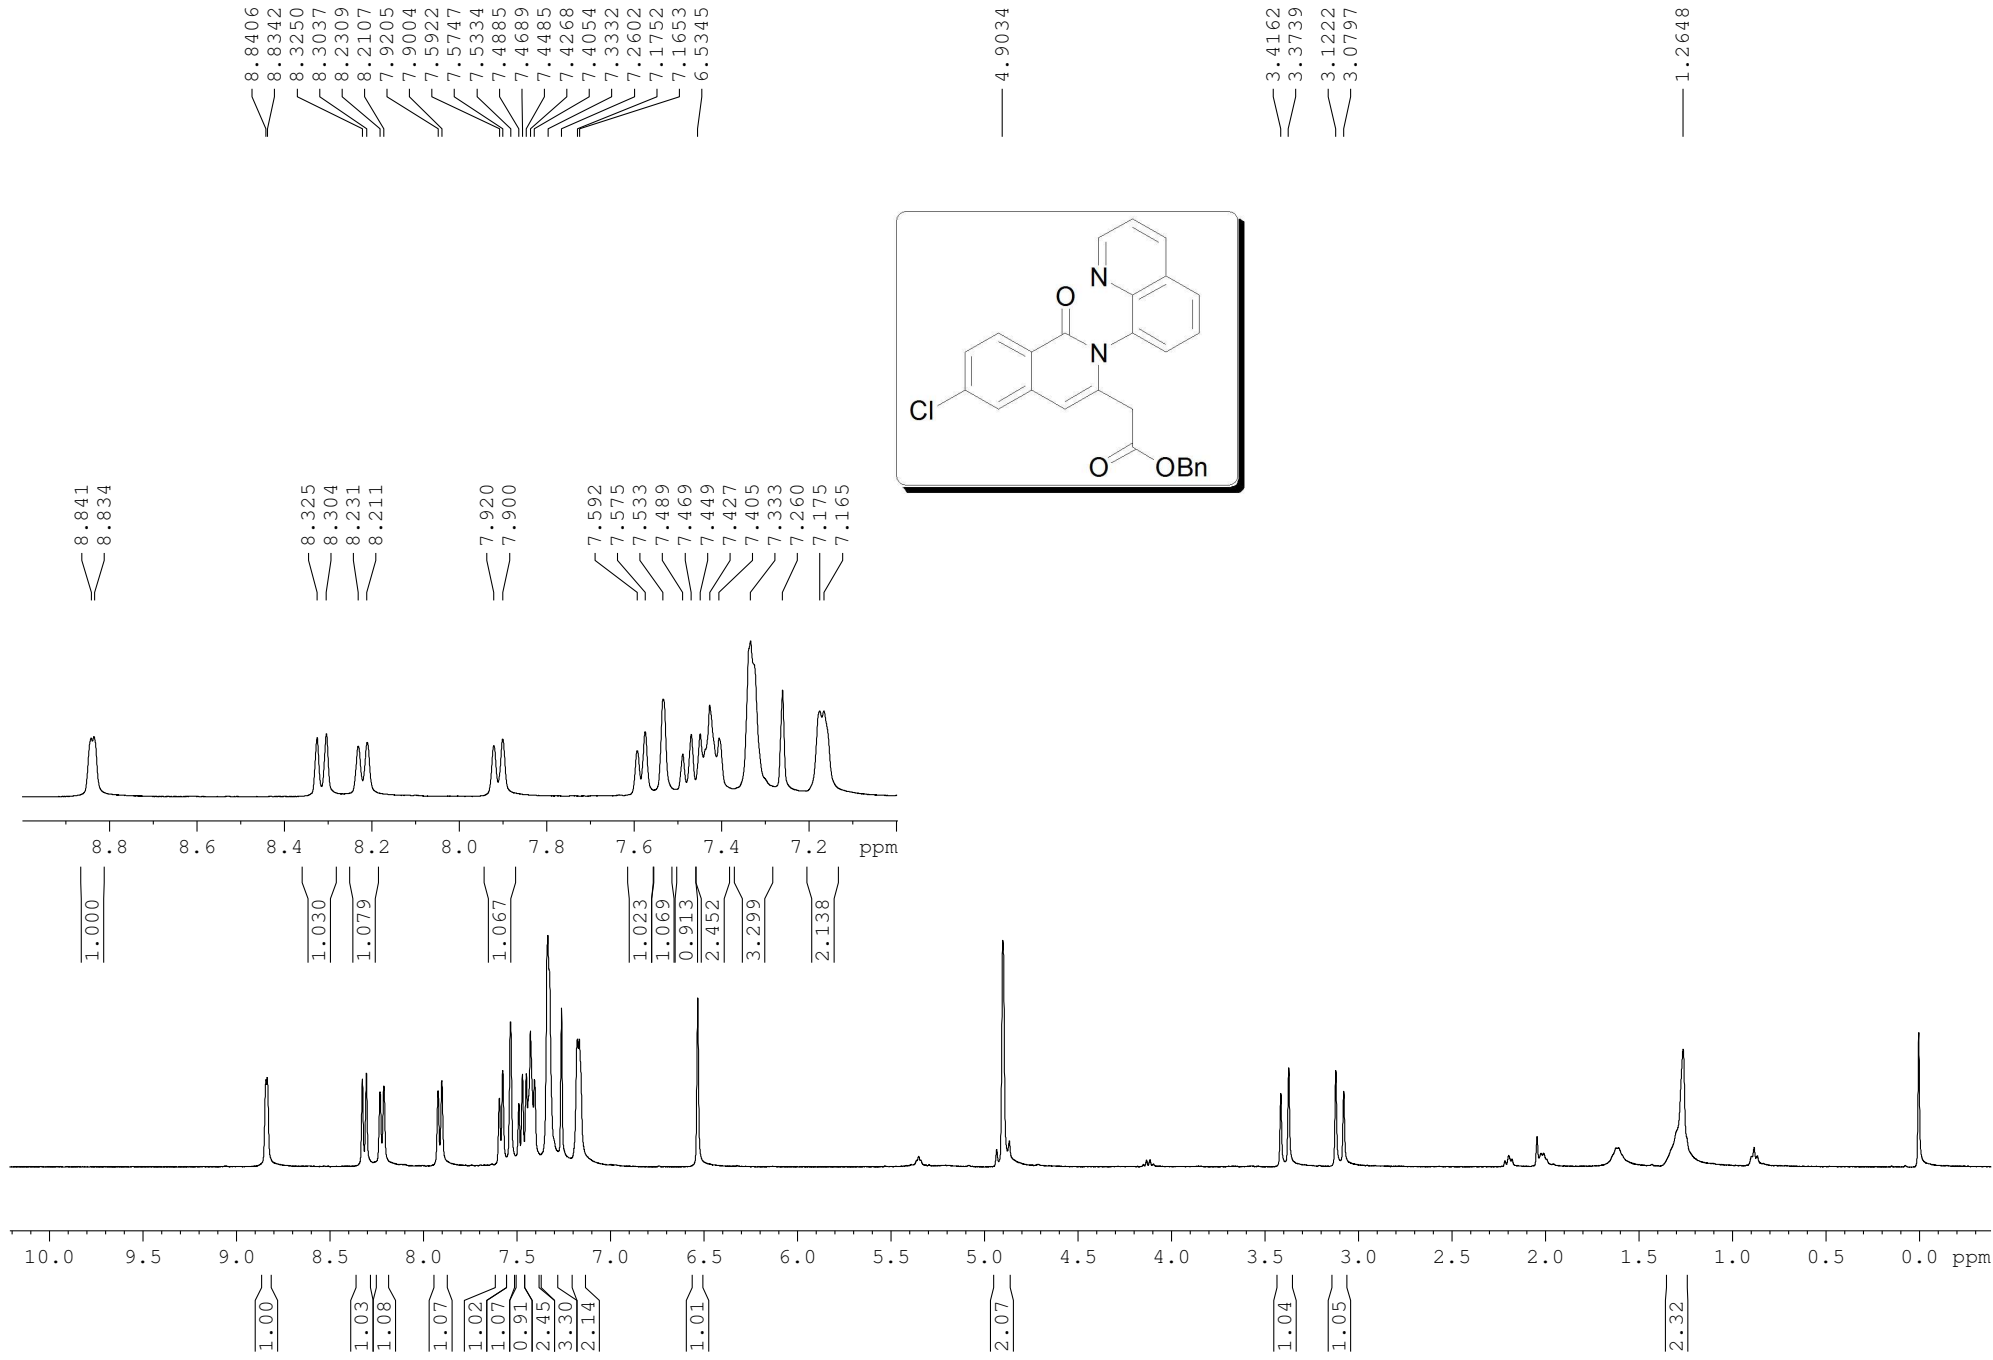

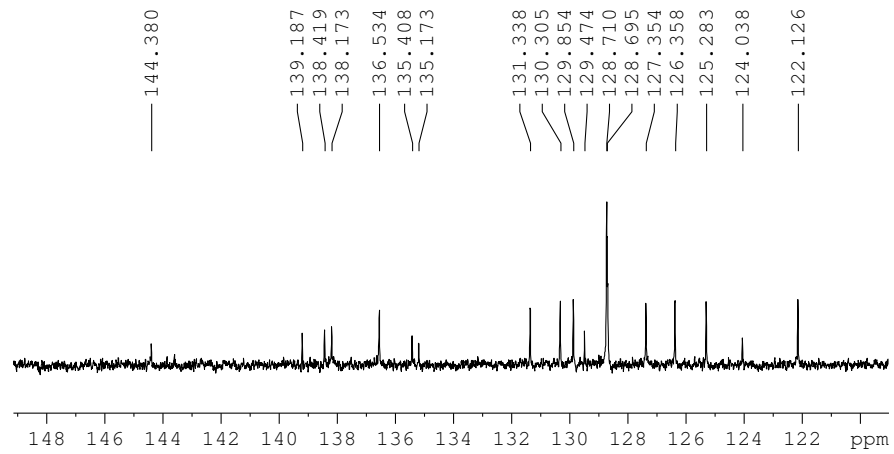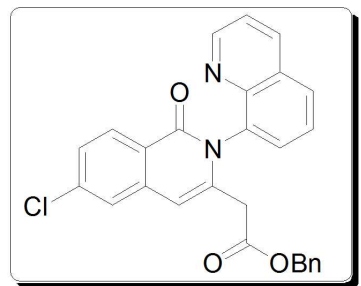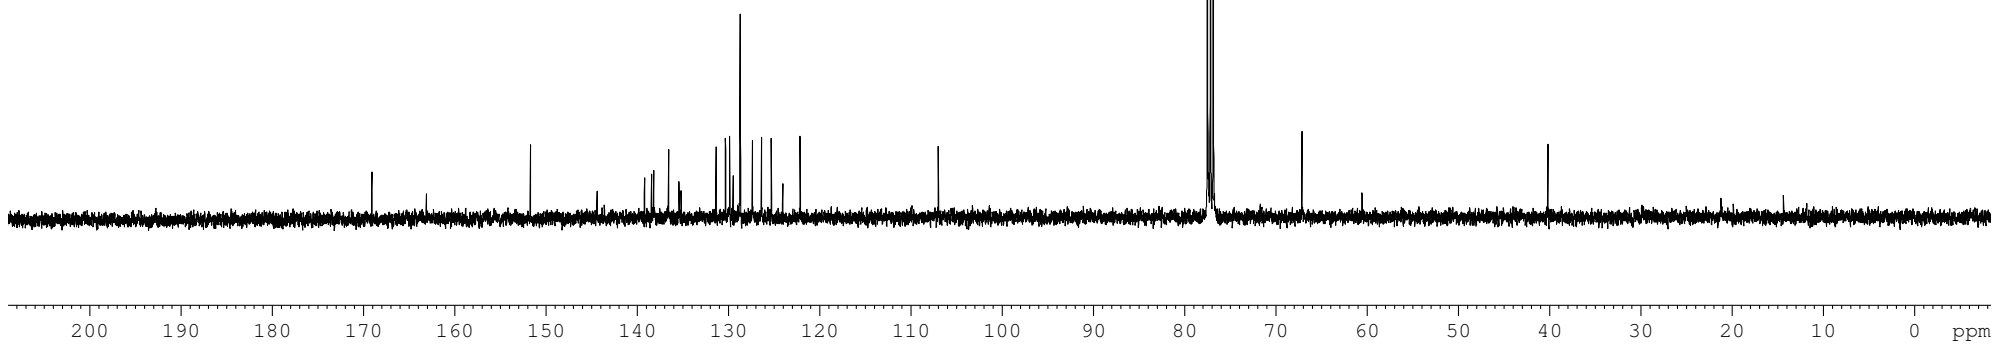

- 169.0742
- 163.0856
- 151.6849
- 144.3795
- 139.1867
- 138.4190
- 138.1726
- 136.5343
- 135.4080
- 135.1734
- 131.3384
- 130.3048
- 129.8543
- 129.4738
- 128.7096
- 128.6948
- 127.3537
- 126.3575
- 125.2834
- 124.0379
- 122.1265
- 106.9827

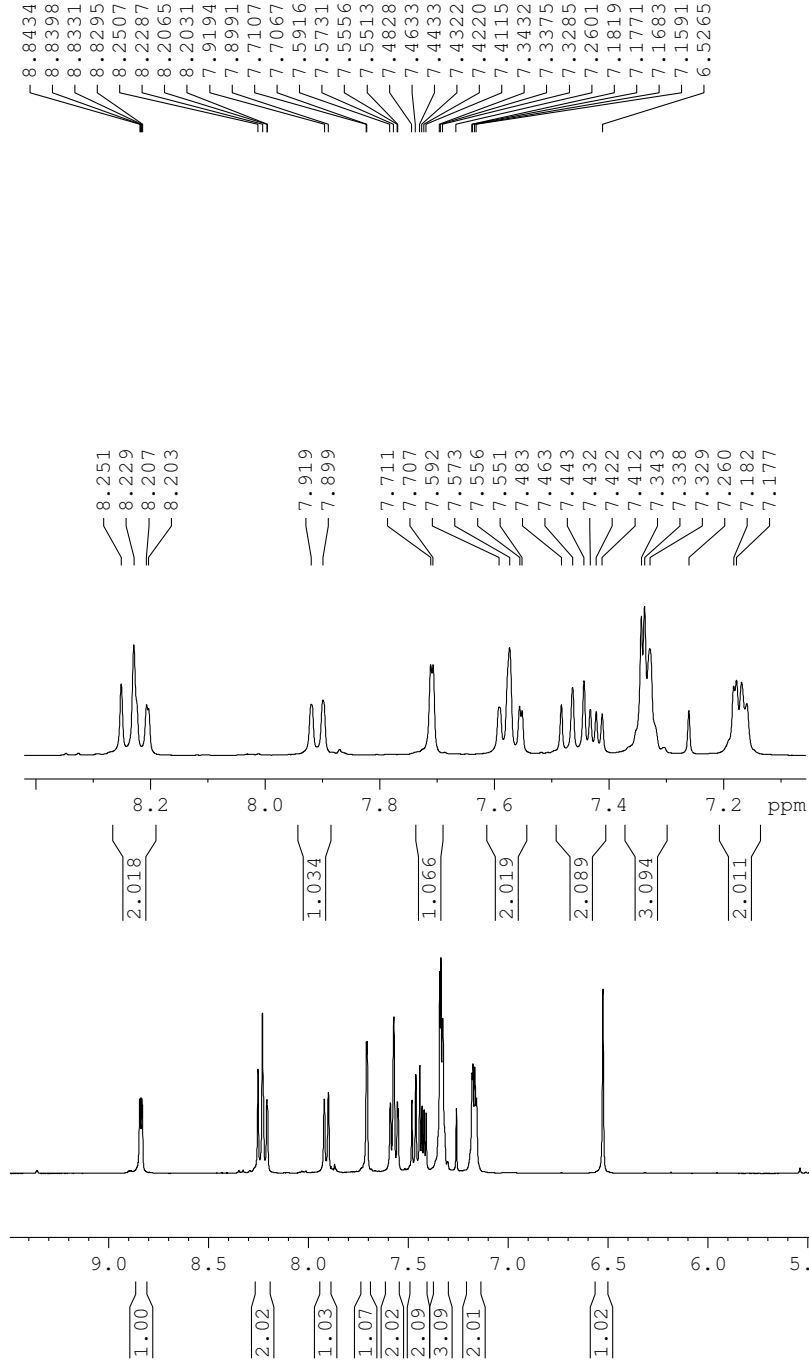

5.2906  
4.9336  
4.9032  
4.8964  
4.8660

3.4222  
3.3798  
3.1212  
3.0789

0.0104

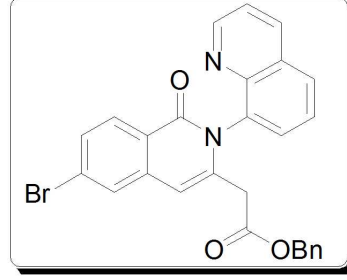



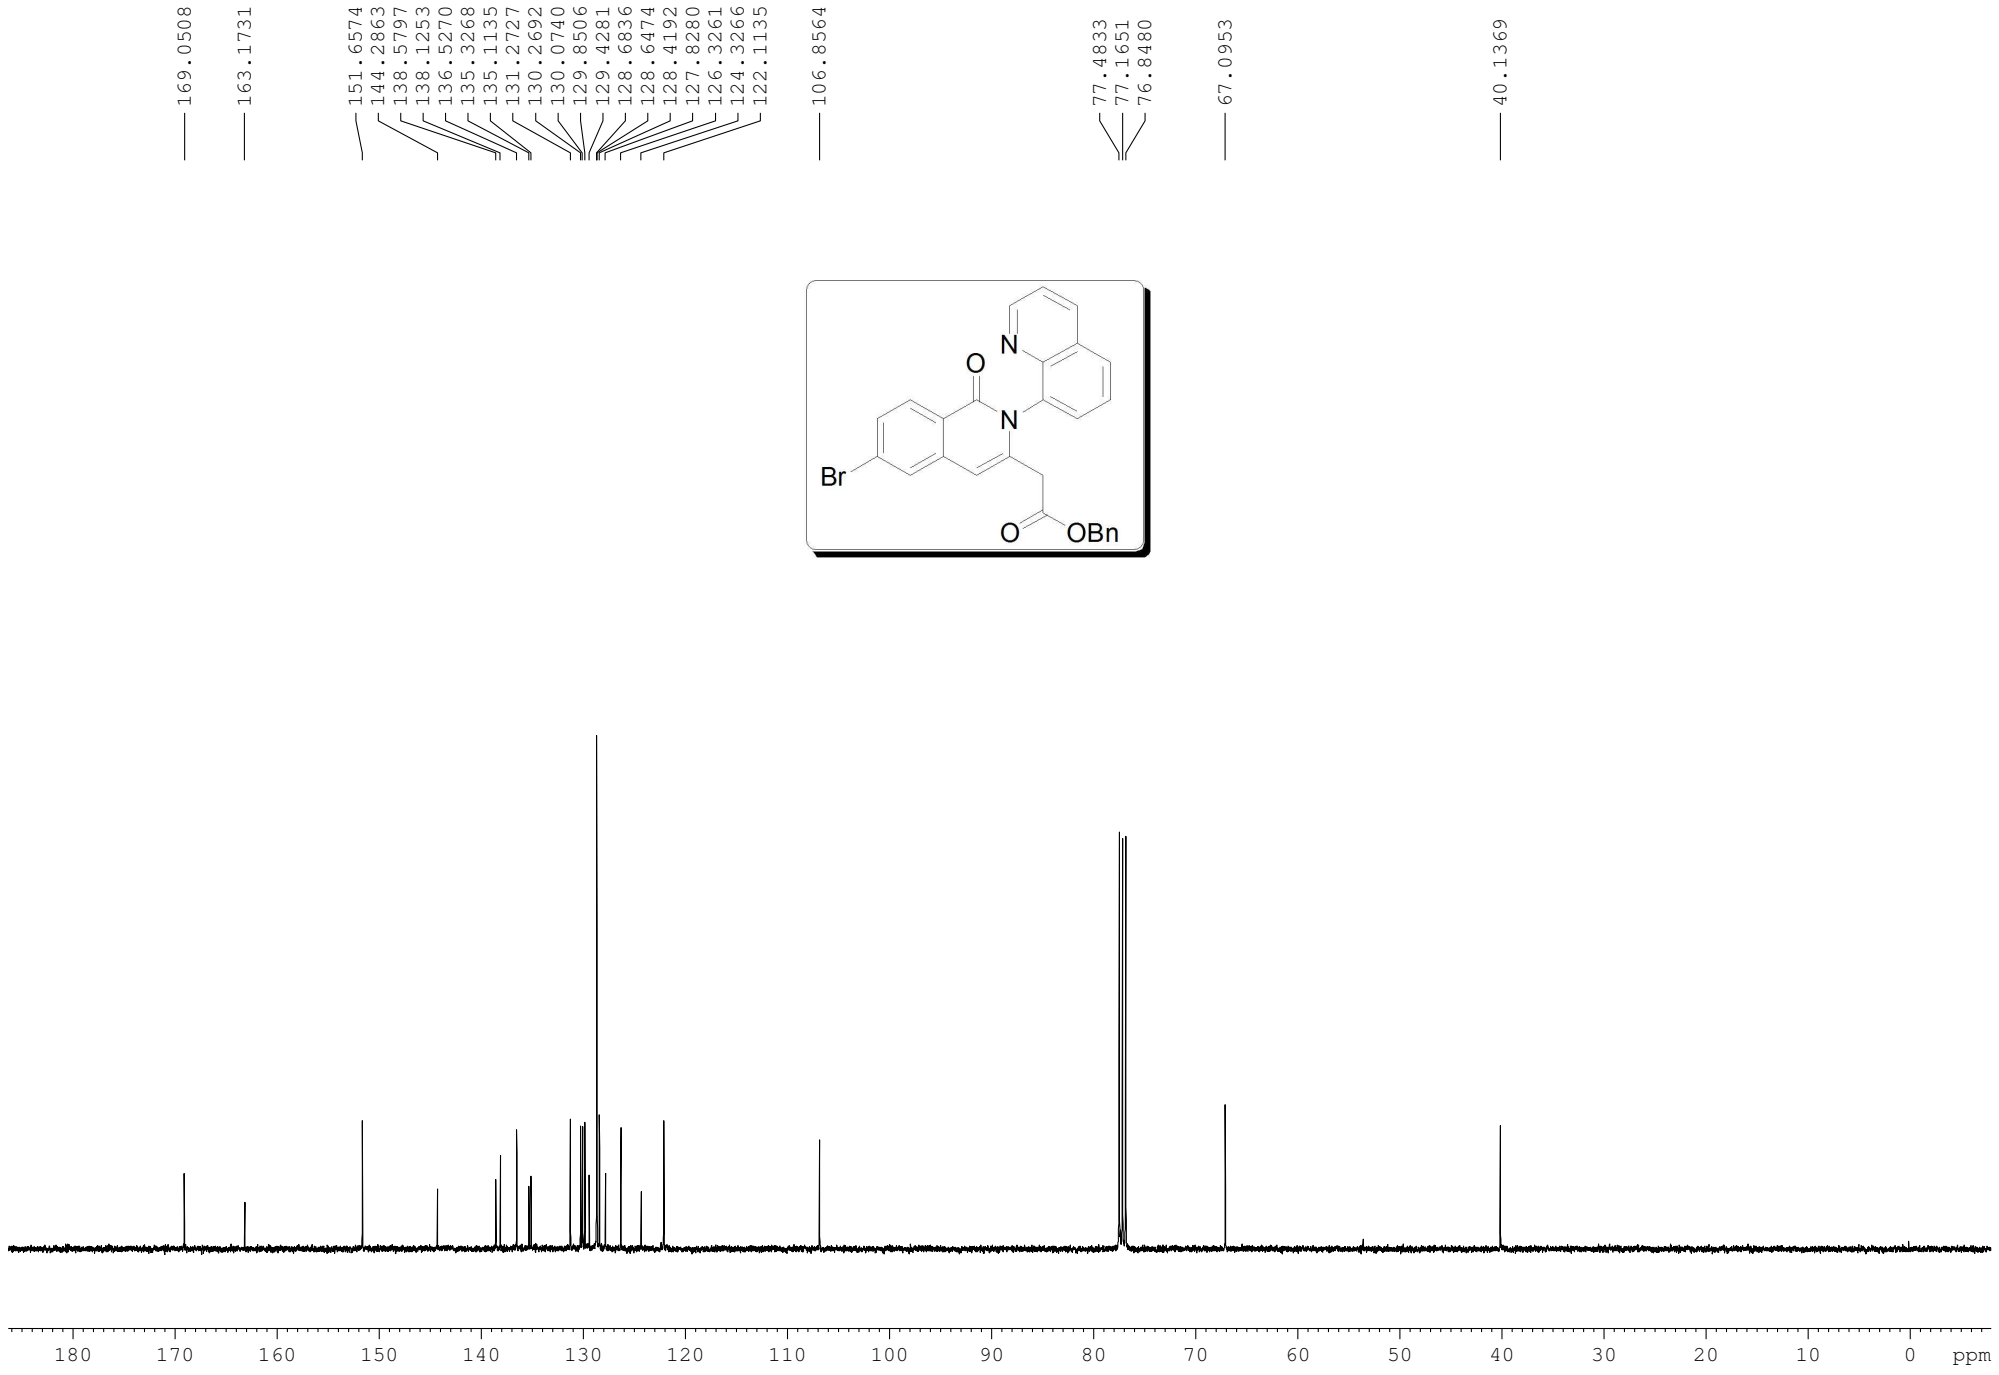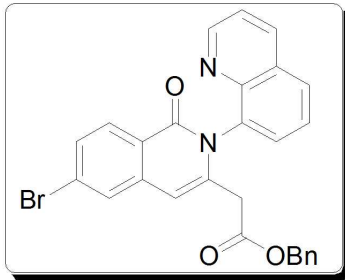

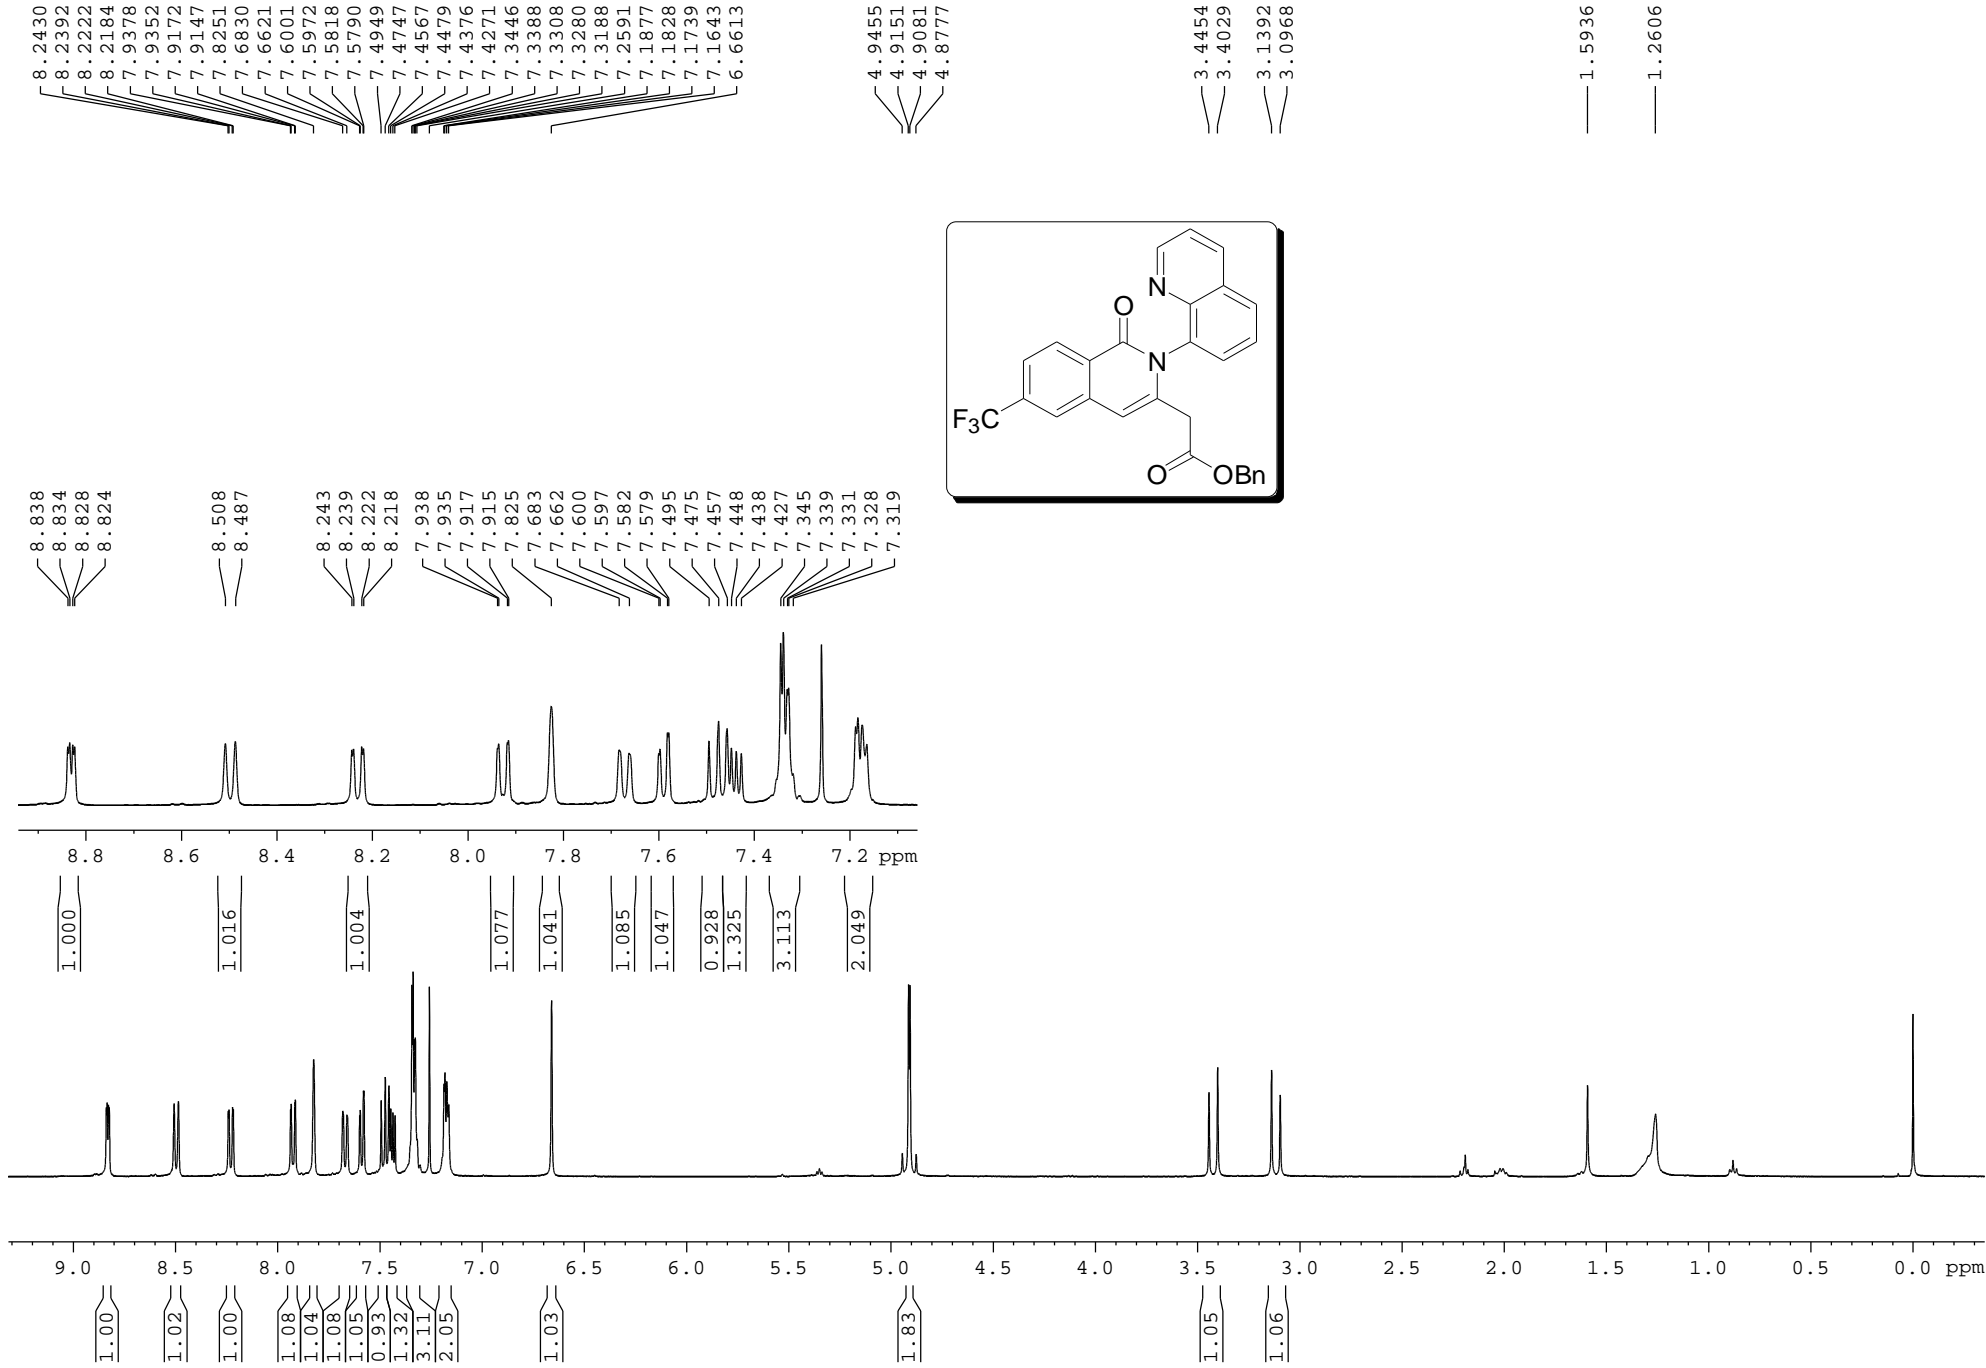

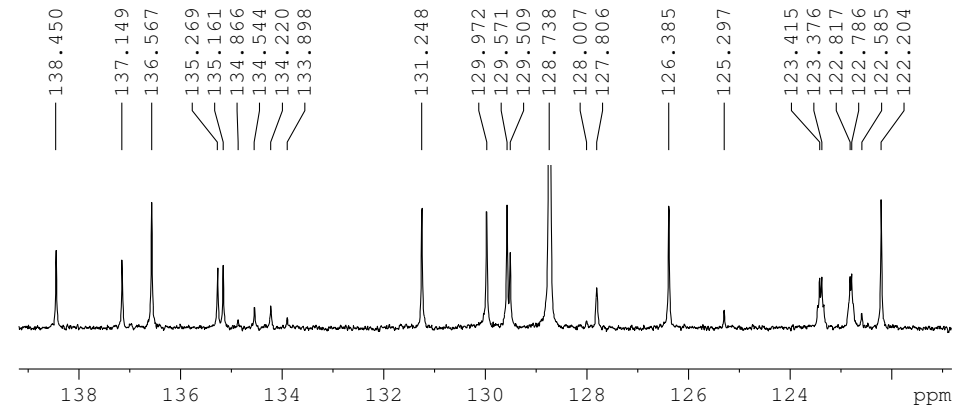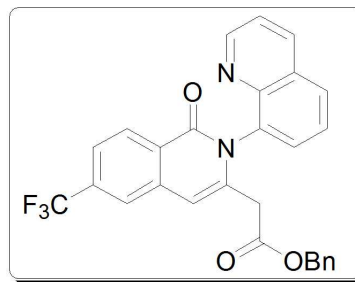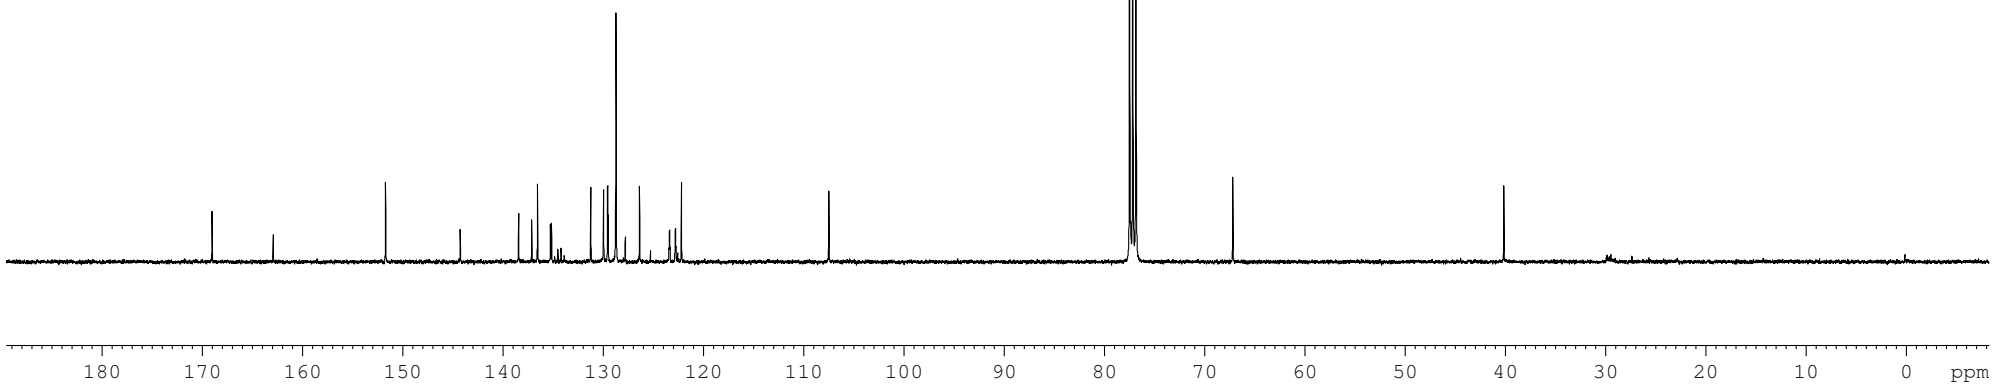

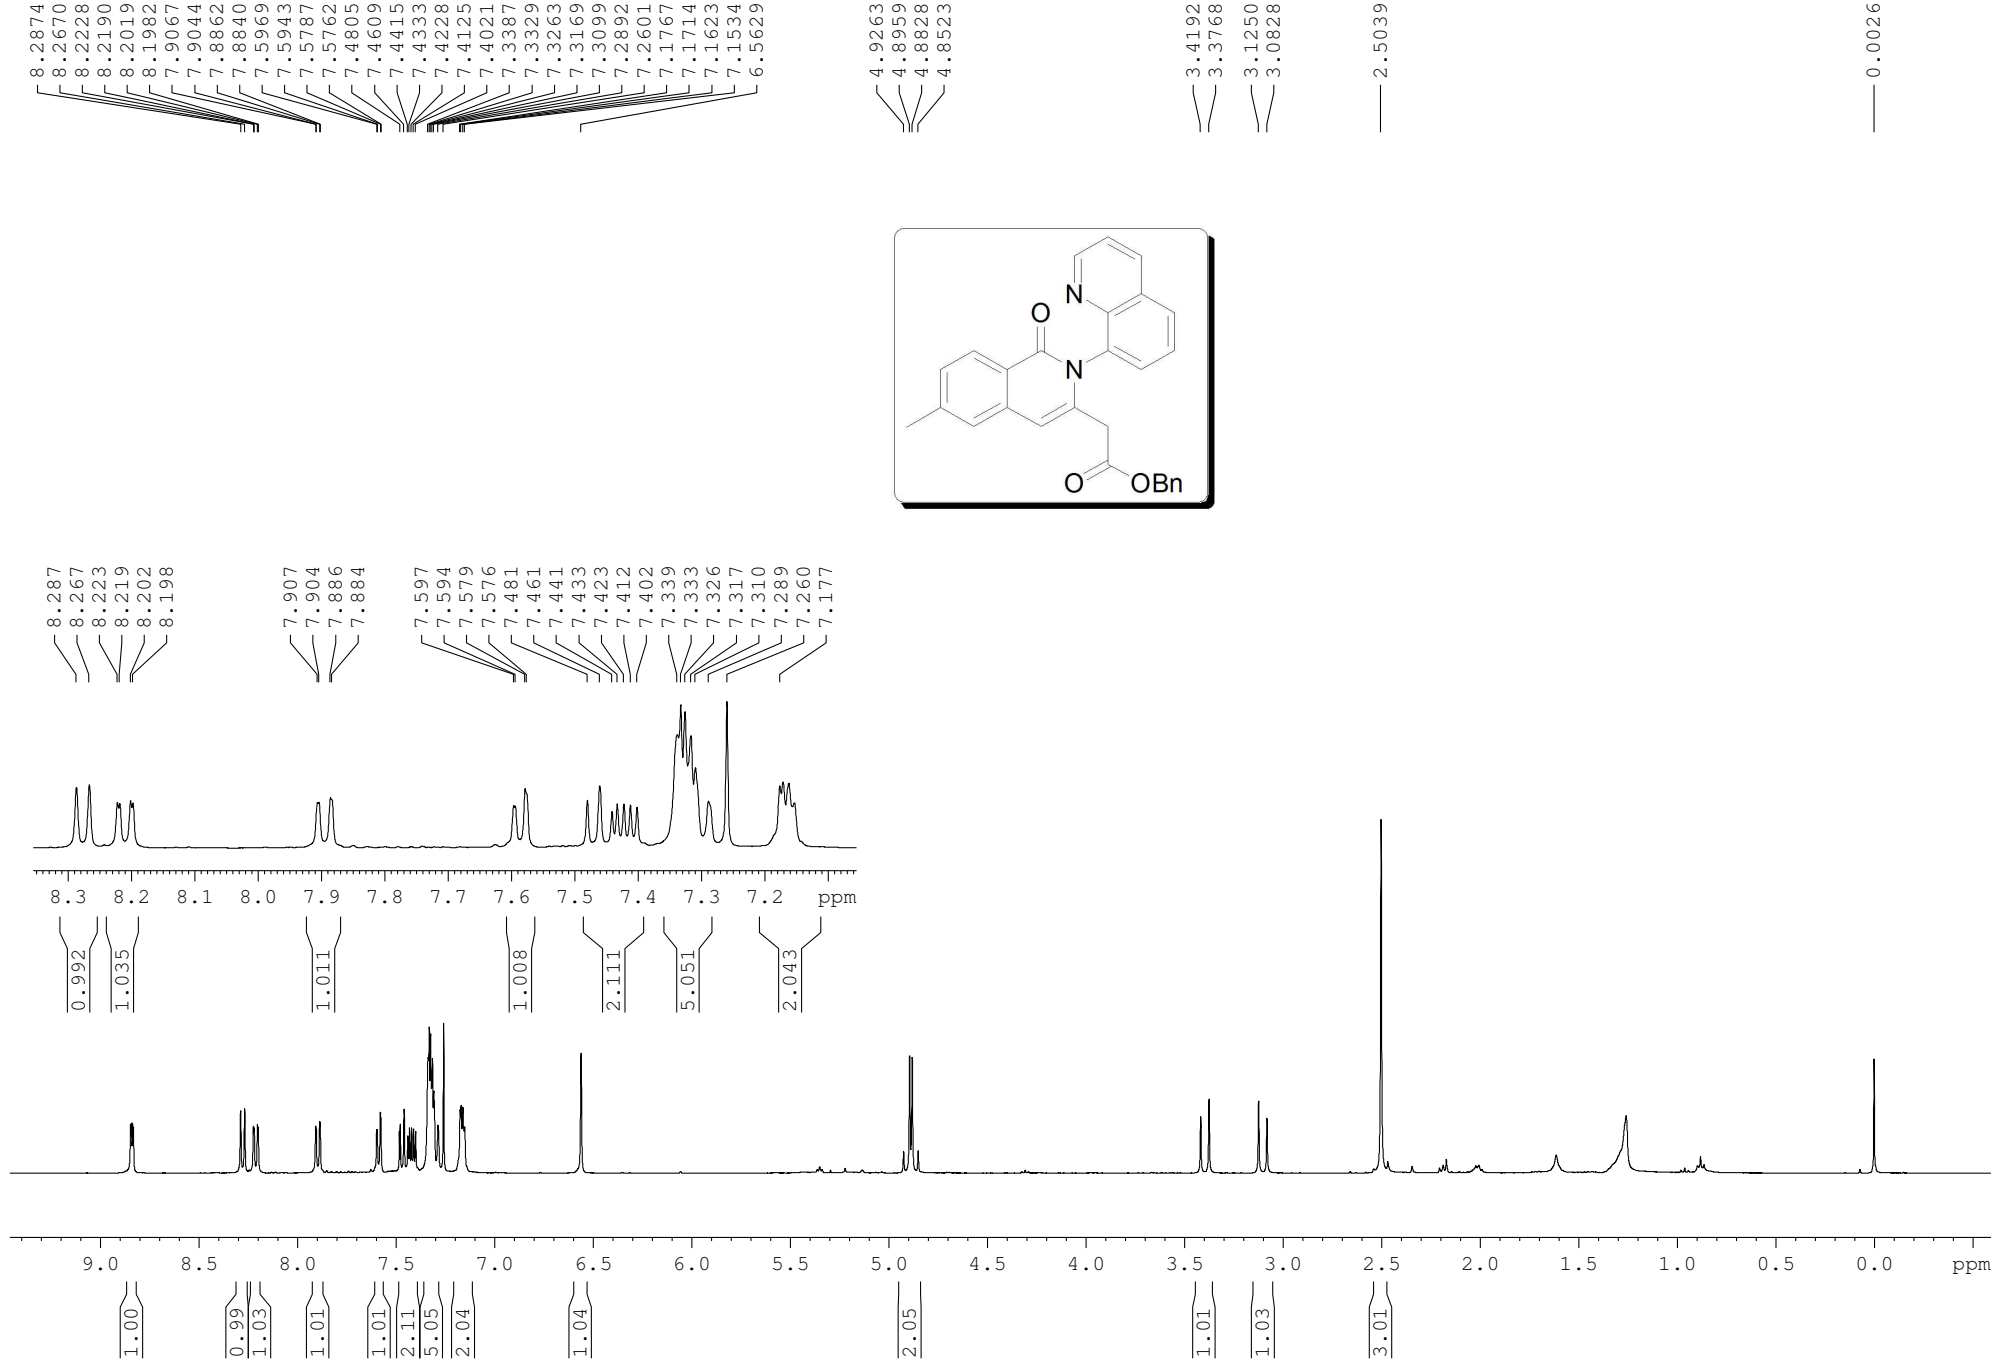

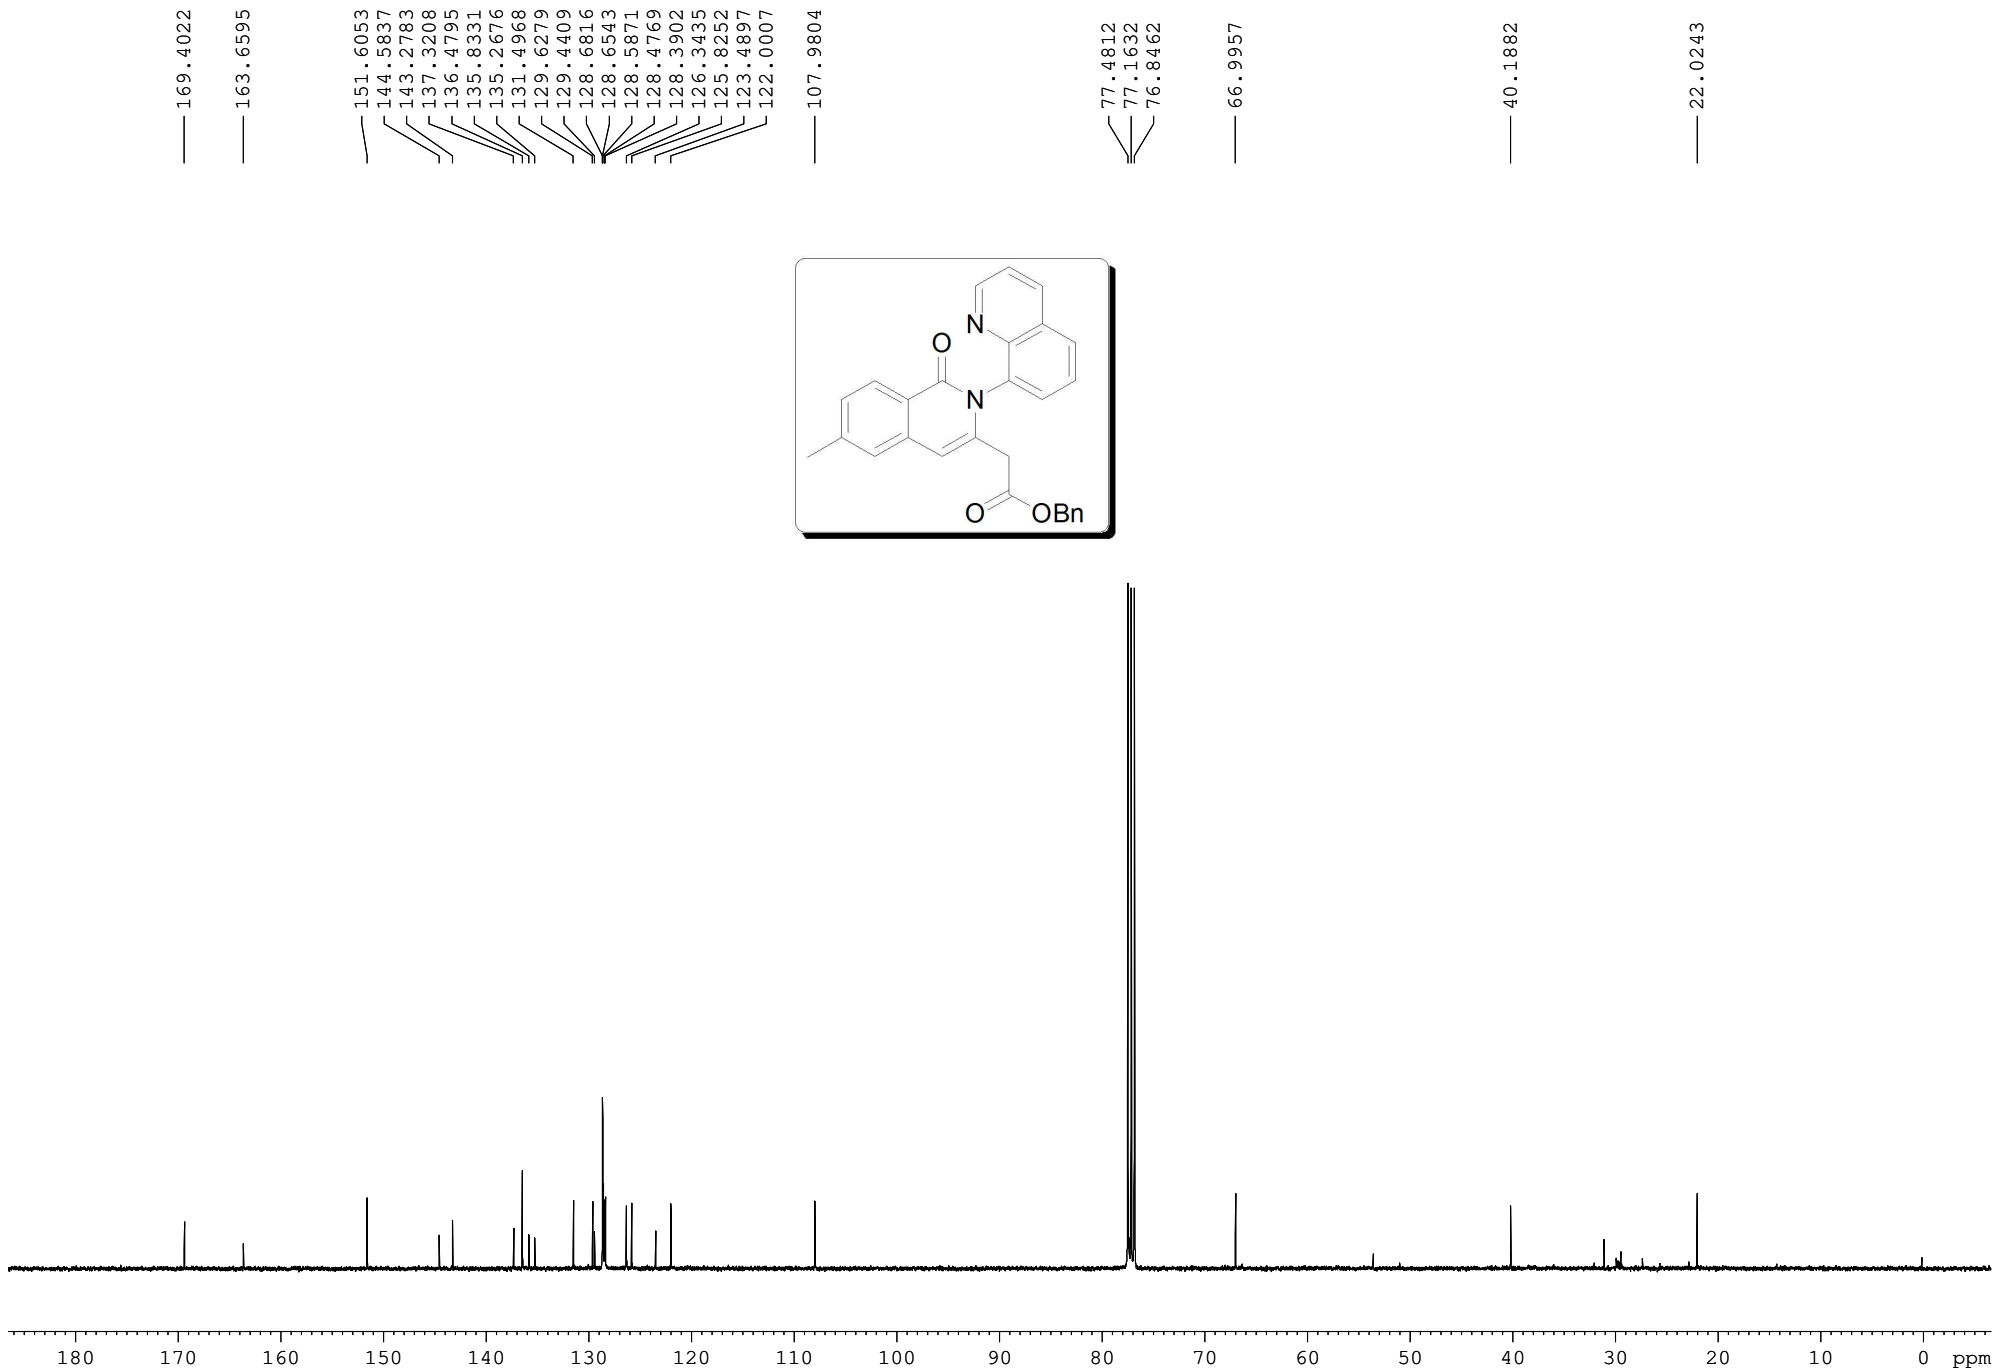

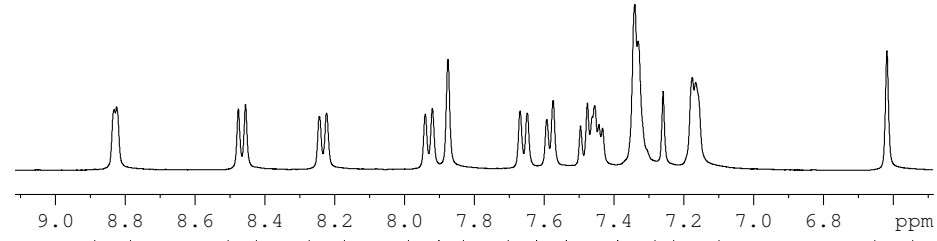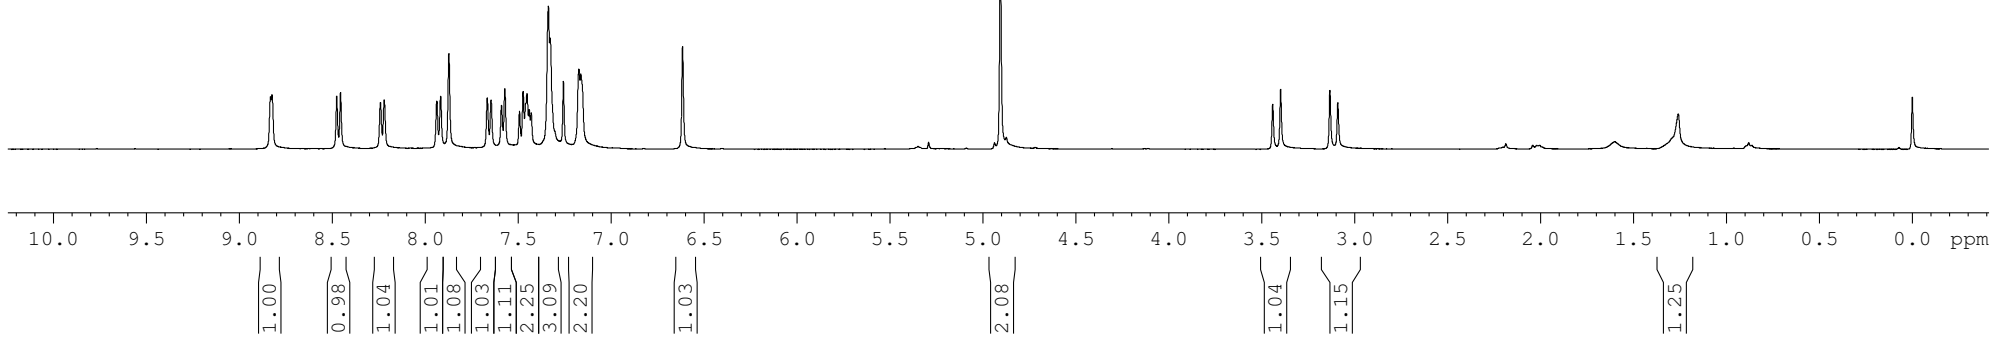

8.8303  
8.8232  
8.4745  
8.4540  
8.2423  
8.2219  
7.9391  
7.9186  
7.8741  
7.6674  
7.6469  
7.5908  
7.5729  
7.4943  
7.4746  
7.4540  
7.4415  
7.4312  
7.3388  
7.3298  
7.2579  
7.1744  
7.1644  
6.6167

4.9068

3.4419  
3.3993  
3.1341  
3.0916

1.2597

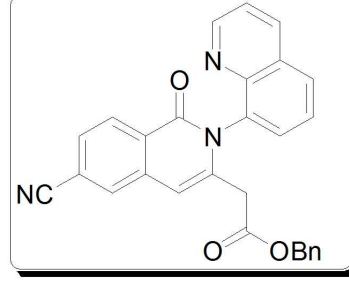

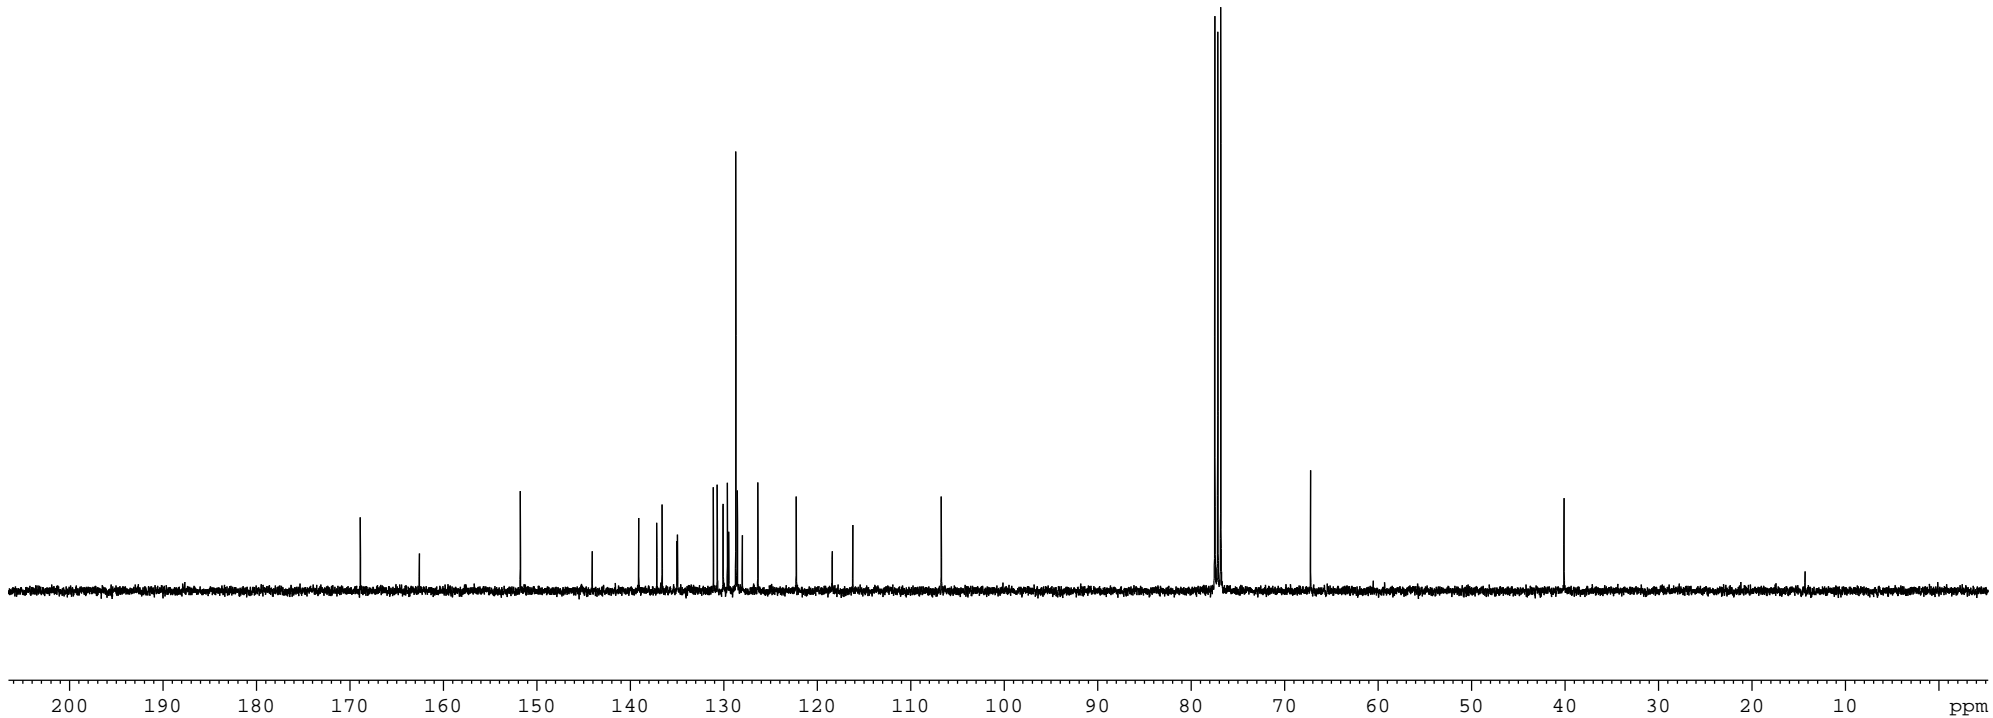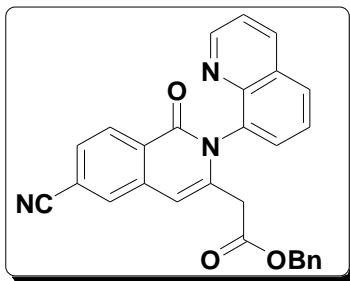

— 168.88

— 162.57

151.76

144.11

139.13

137.20

136.62

135.04

134.98

131.15

130.72

130.11

129.64

129.50

128.75

128.57

128.05

126.38

122.27

118.42

116.23

— 106.76

77.49

77.17

76.86

— 67.25

— 40.13

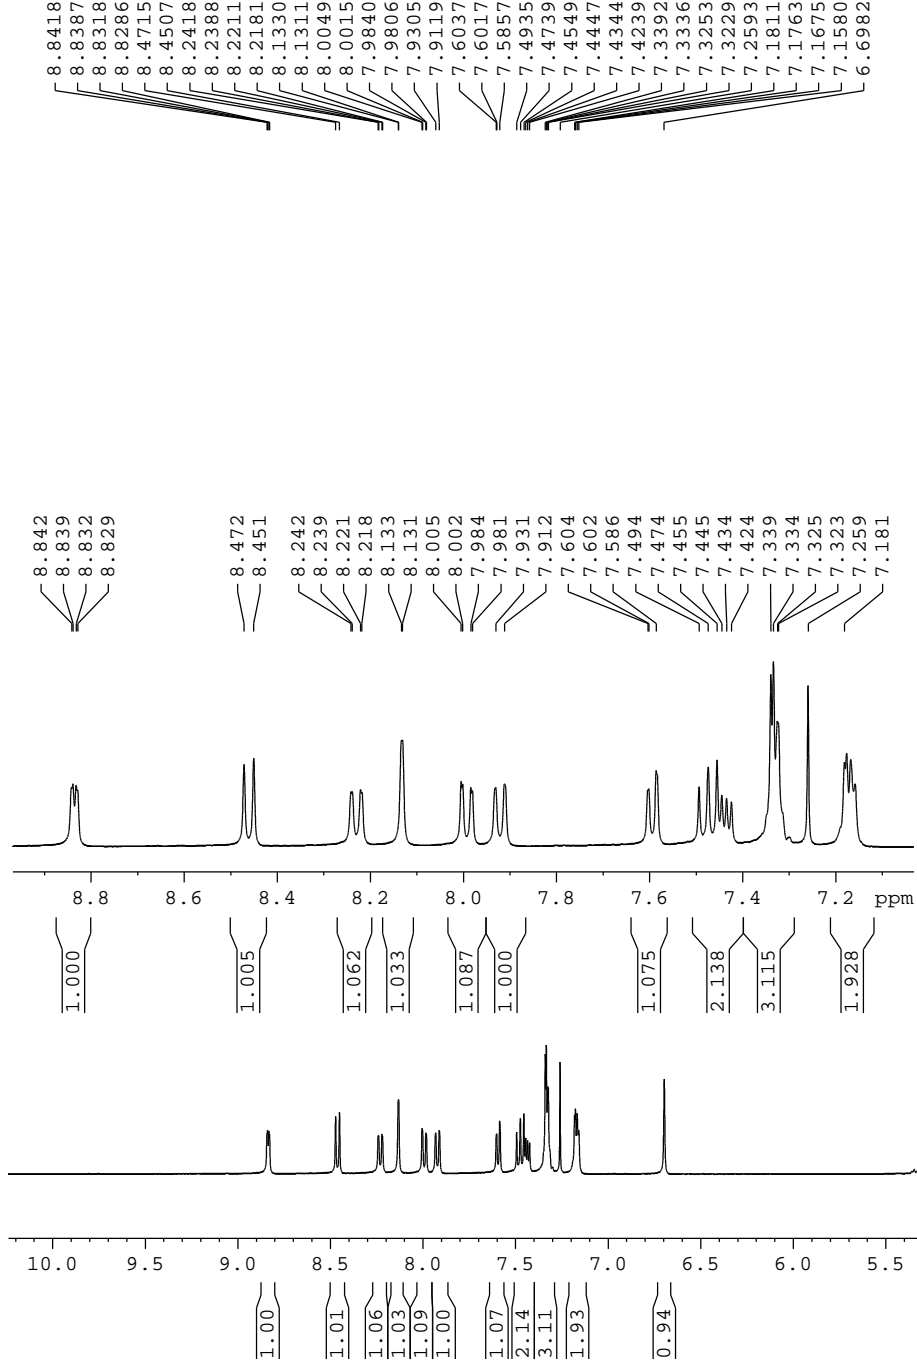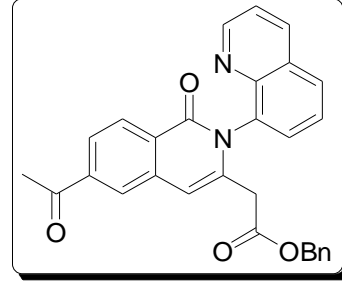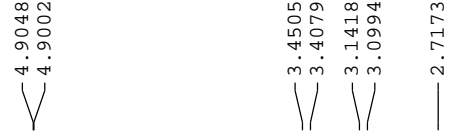



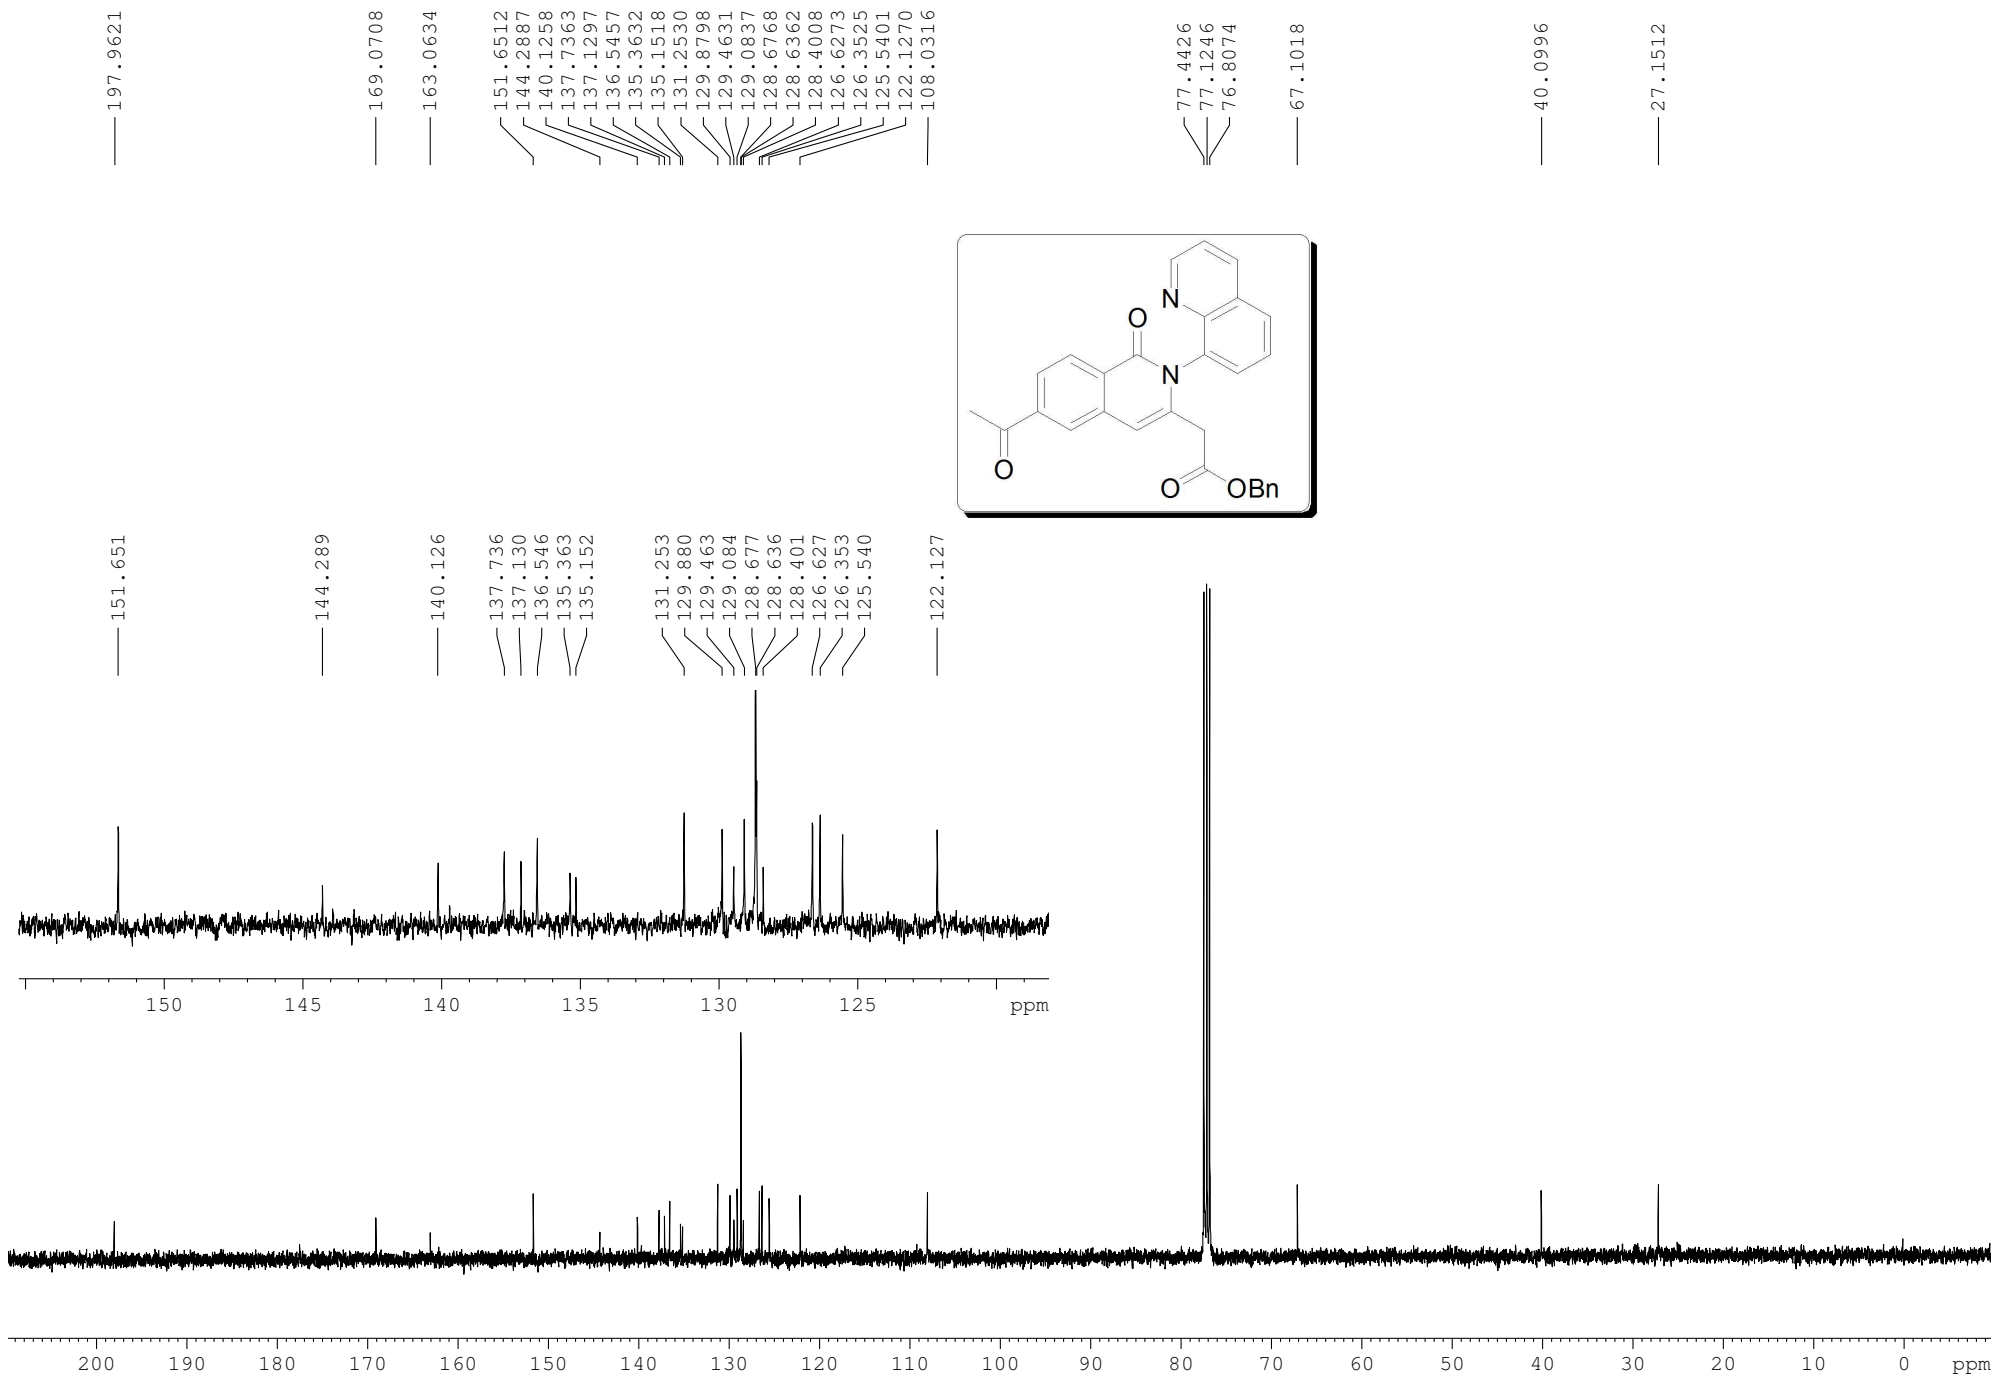

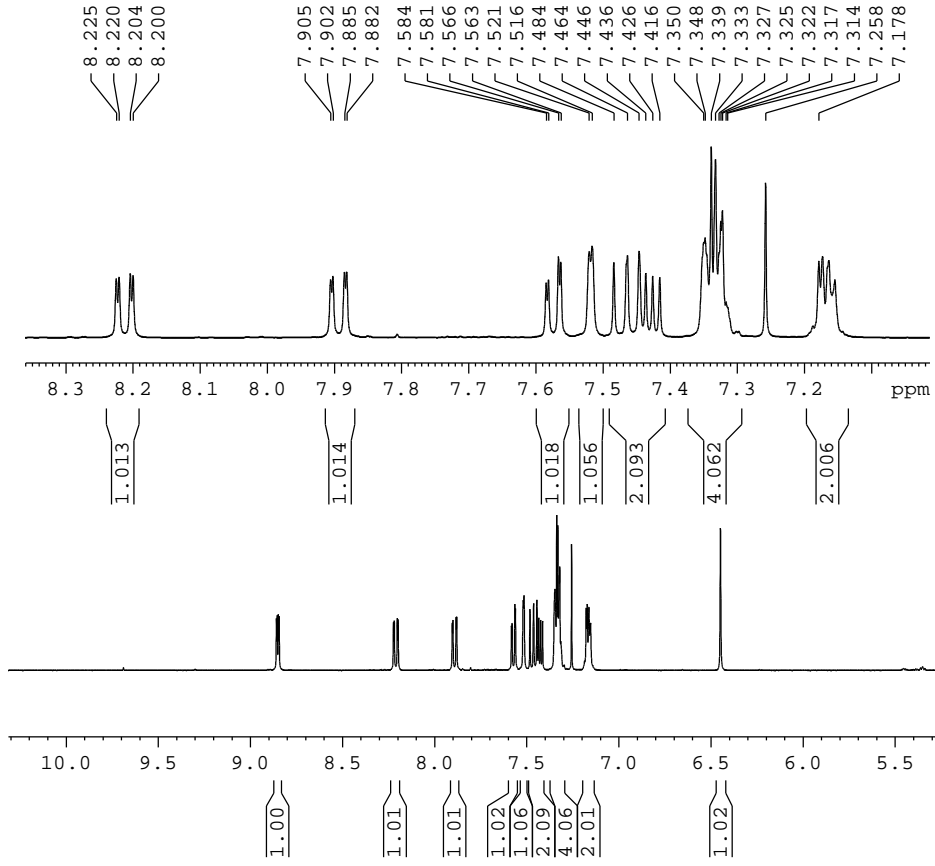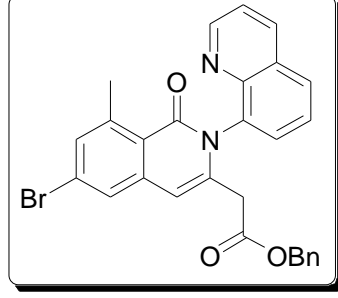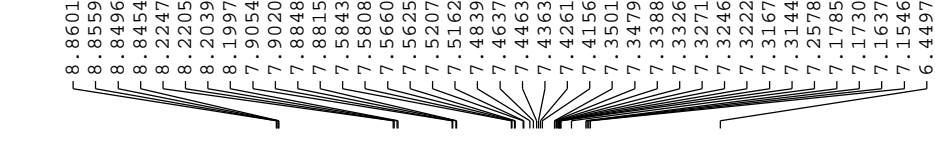

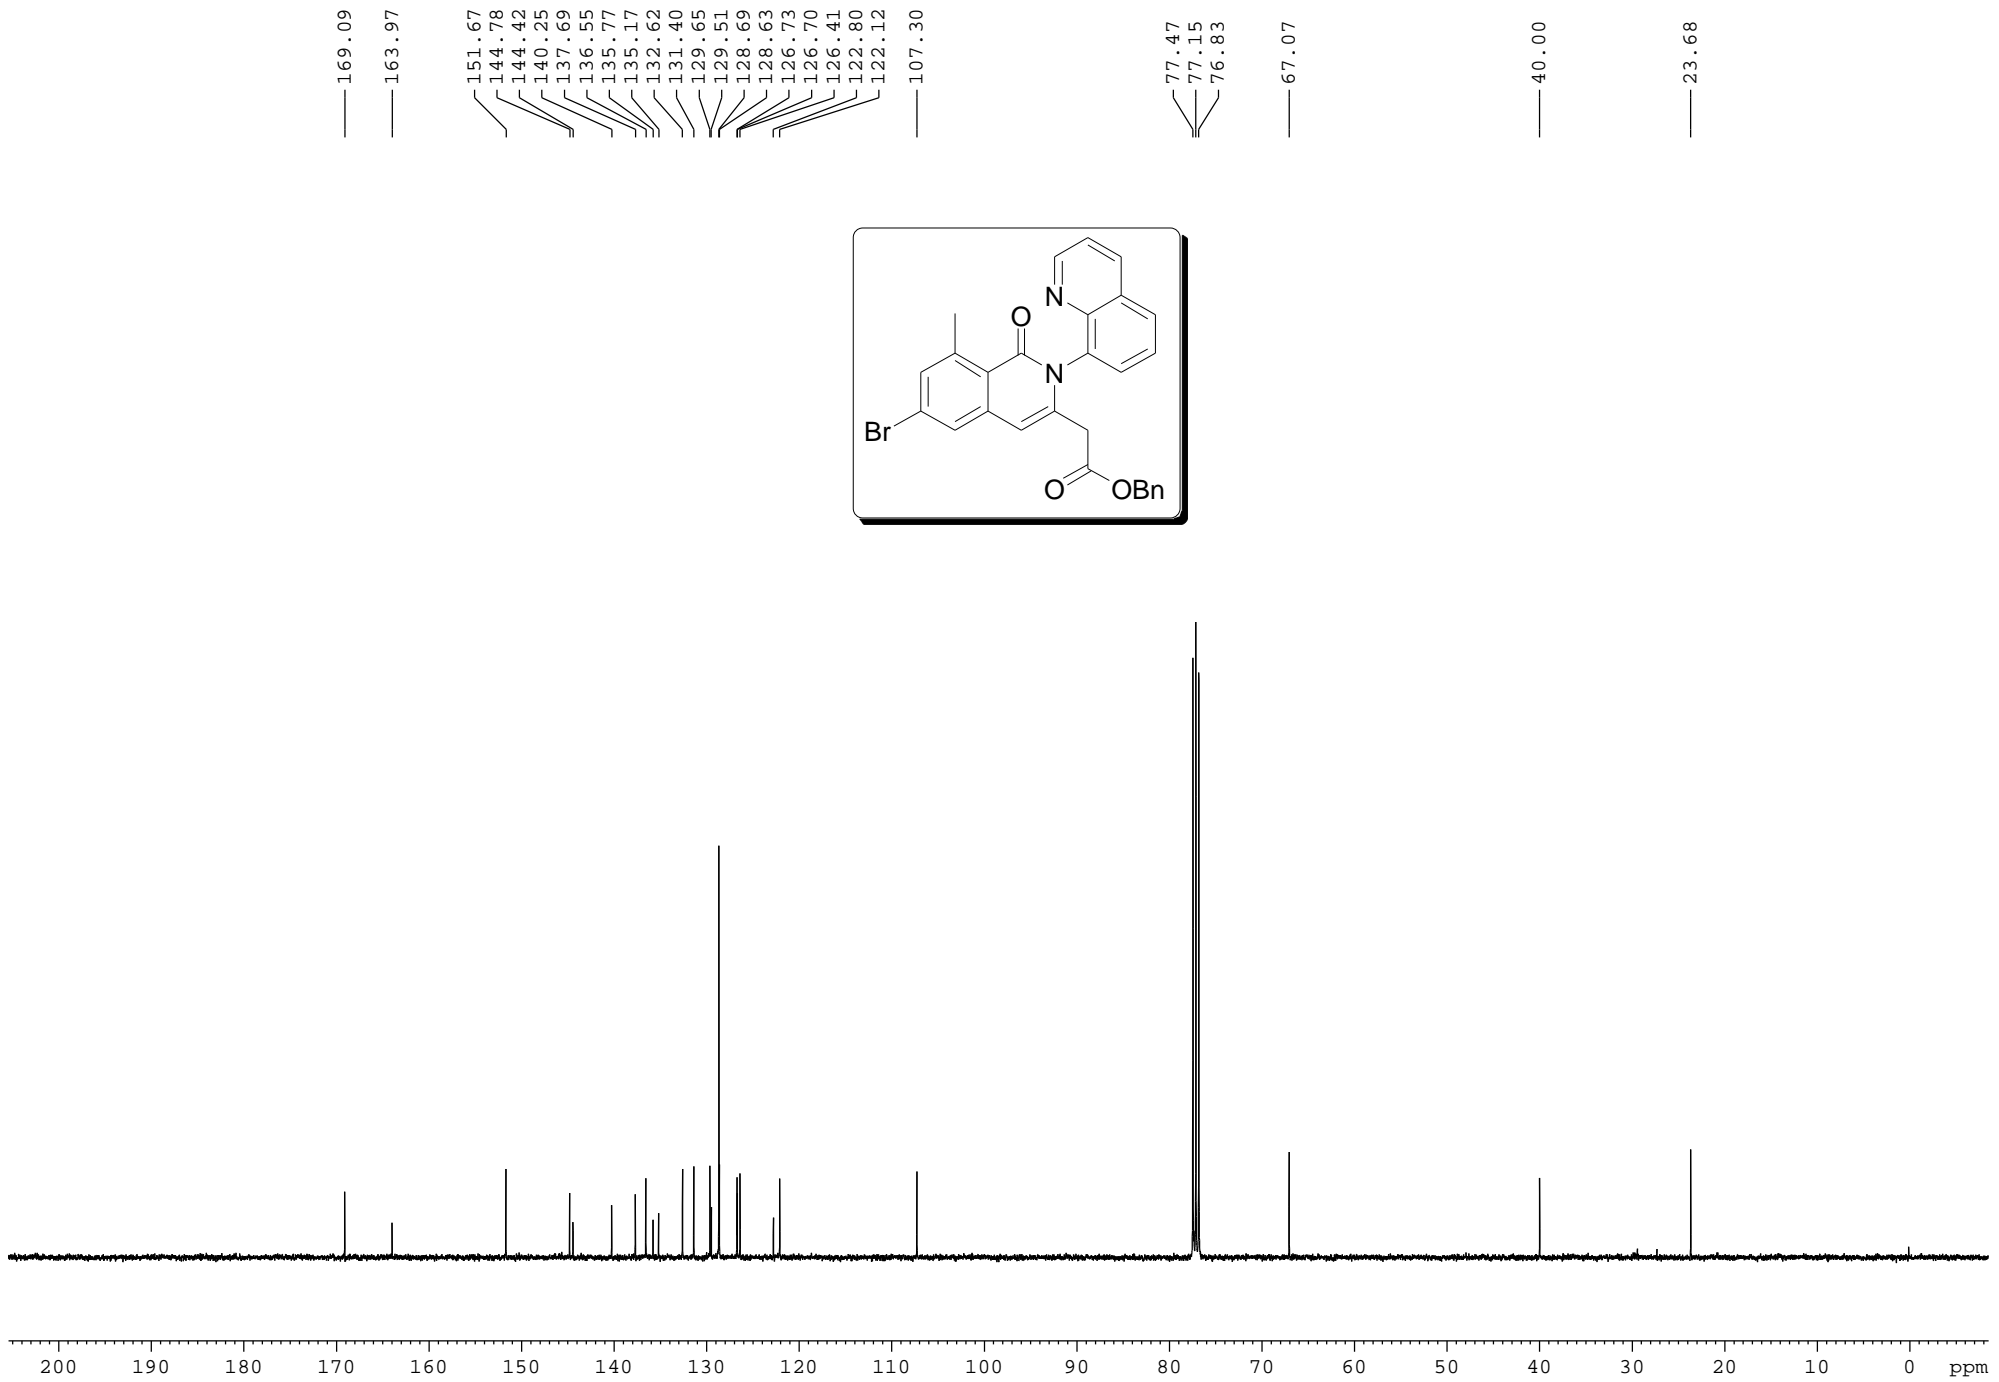

8.8478  
8.8415  
8.8373  
8.2238  
8.2197  
8.2030  
8.1989  
7.9093  
7.9061  
7.8887  
7.8855  
7.6138  
7.6018  
7.5935  
7.5901  
7.5818  
7.5747  
7.5720  
7.5618  
7.4786  
7.4586  
7.4397  
7.4293  
7.4191  
7.4085  
7.3464  
7.3368  
7.3305  
7.3221  
7.3203  
7.3142  
7.2944  
7.2591  
7.1782  
7.1728  
7.1635  
7.1544  
7.1138  
7.1123  
7.0937  
7.0920  
7.0855  
7.0653  
6.5805  
6.5761  
4.9342  
4.9039  
4.8937  
4.8633

3.4066  
3.3642  
3.1209  
3.0786

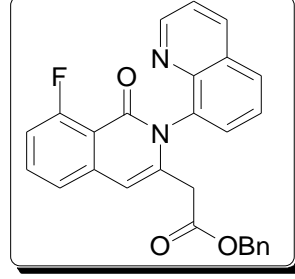

8.224  
8.220  
8.203  
8.199

7.909  
7.906  
7.889  
7.886  
7.614  
7.602  
7.593  
7.590  
7.582  
7.575  
7.572  
7.562  
7.479  
7.459  
7.440  
7.429  
7.419  
7.409  
7.346  
7.337  
7.330  
7.322  
7.320  
7.314  
7.294  
7.259  
7.178  
7.173  
7.164  
7.154

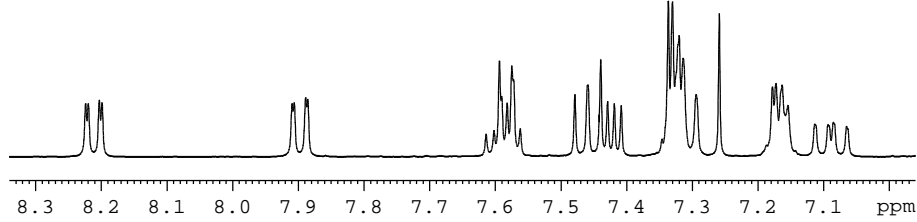

1.037  
1.030  
2.041  
2.144  
4.093  
2.019  
1.062

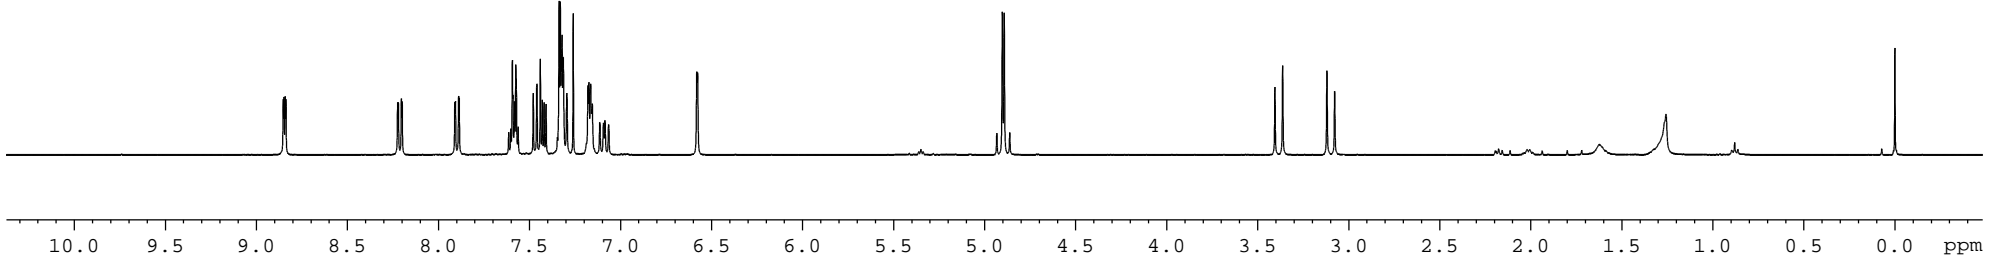

1.00  
1.04  
1.03  
2.04  
2.14  
4.09  
1.06  
1.01  
2.06  
1.01  
1.04

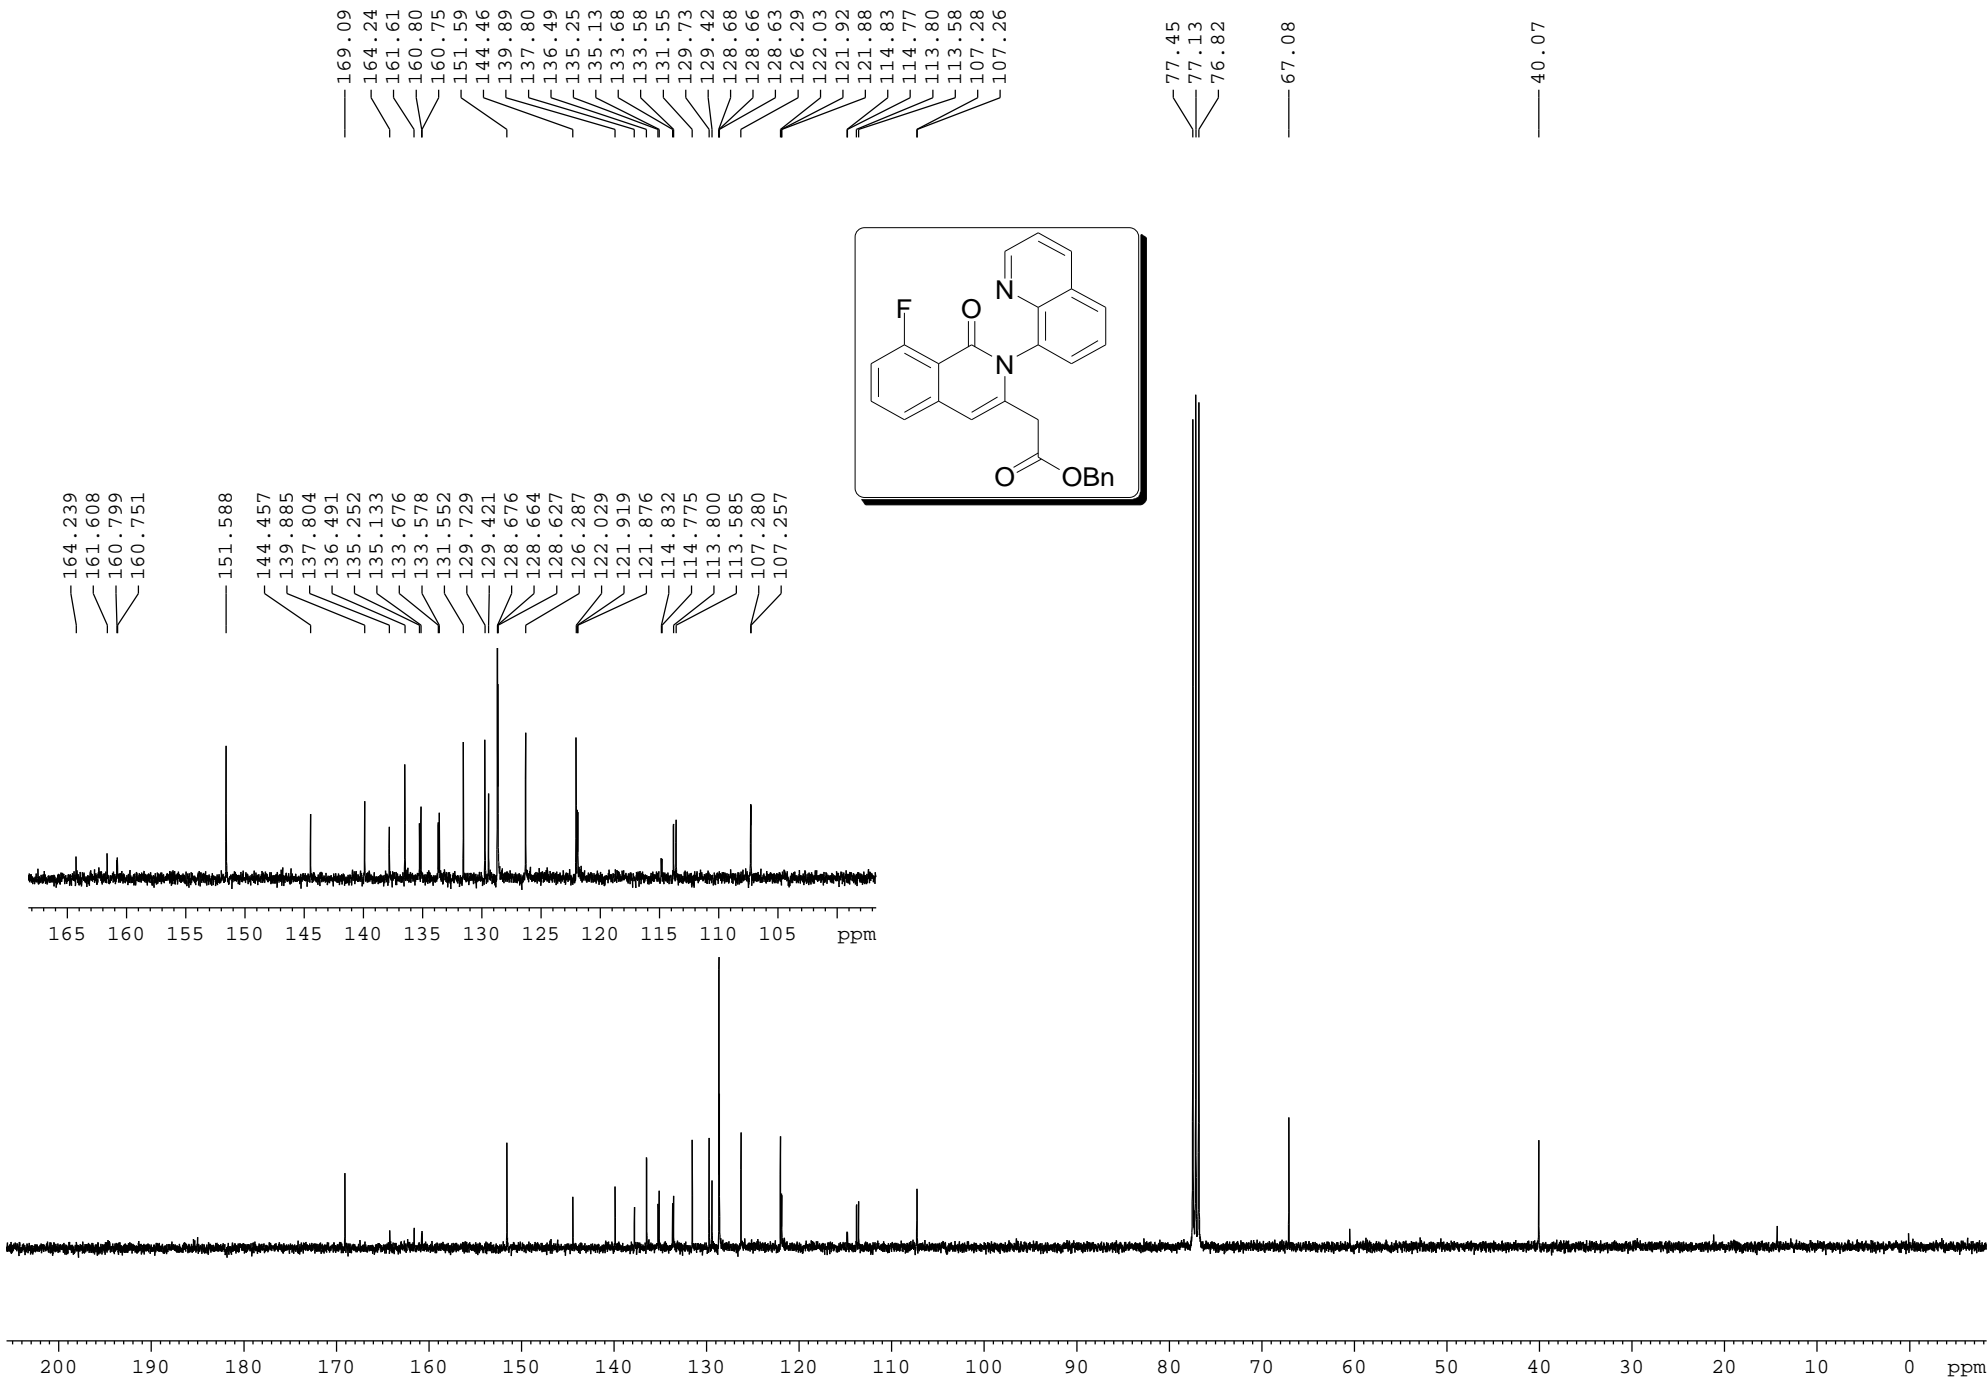

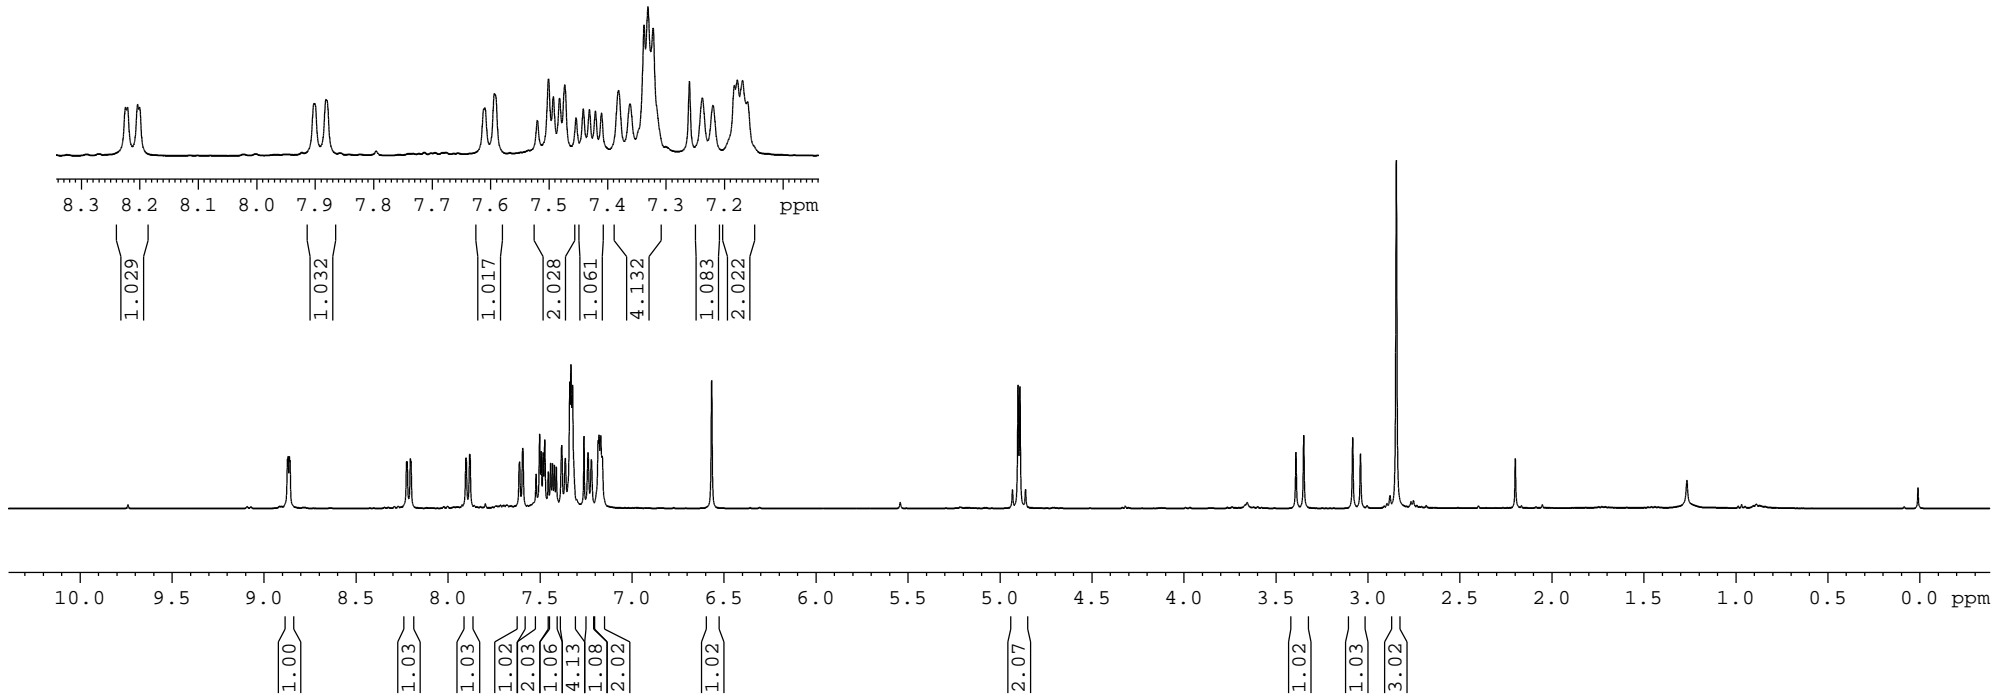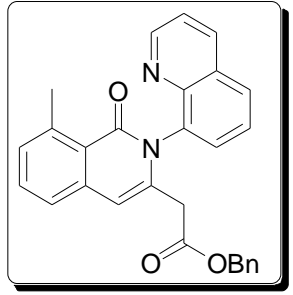

8.8717  
8.8682  
8.8615  
8.8580  
8.2242  
8.2209  
8.2035  
8.2001  
7.9018  
7.8812  
7.6099  
7.5937  
7.5202  
7.5011  
7.4928  
7.4821  
7.4732  
7.4539  
7.4415  
7.4311  
7.4208  
7.4103  
7.3813  
7.3616  
7.3376  
7.3309  
7.3221  
7.2599  
7.2380  
7.2197  
7.1832  
7.1780  
7.1691  
7.1605  
6.5660

8.224  
8.221  
8.204  
8.200  
7.902  
7.881  
7.610  
7.594  
7.520  
7.501  
7.493  
7.482  
7.473  
7.454  
7.441  
7.431  
7.421  
7.410  
7.381  
7.362  
7.338  
7.331  
7.322  
7.260  
7.238  
7.220

4.9311  
4.9007  
4.8905  
4.8601

3.3902  
3.3478  
3.0834  
3.0412  
2.8462

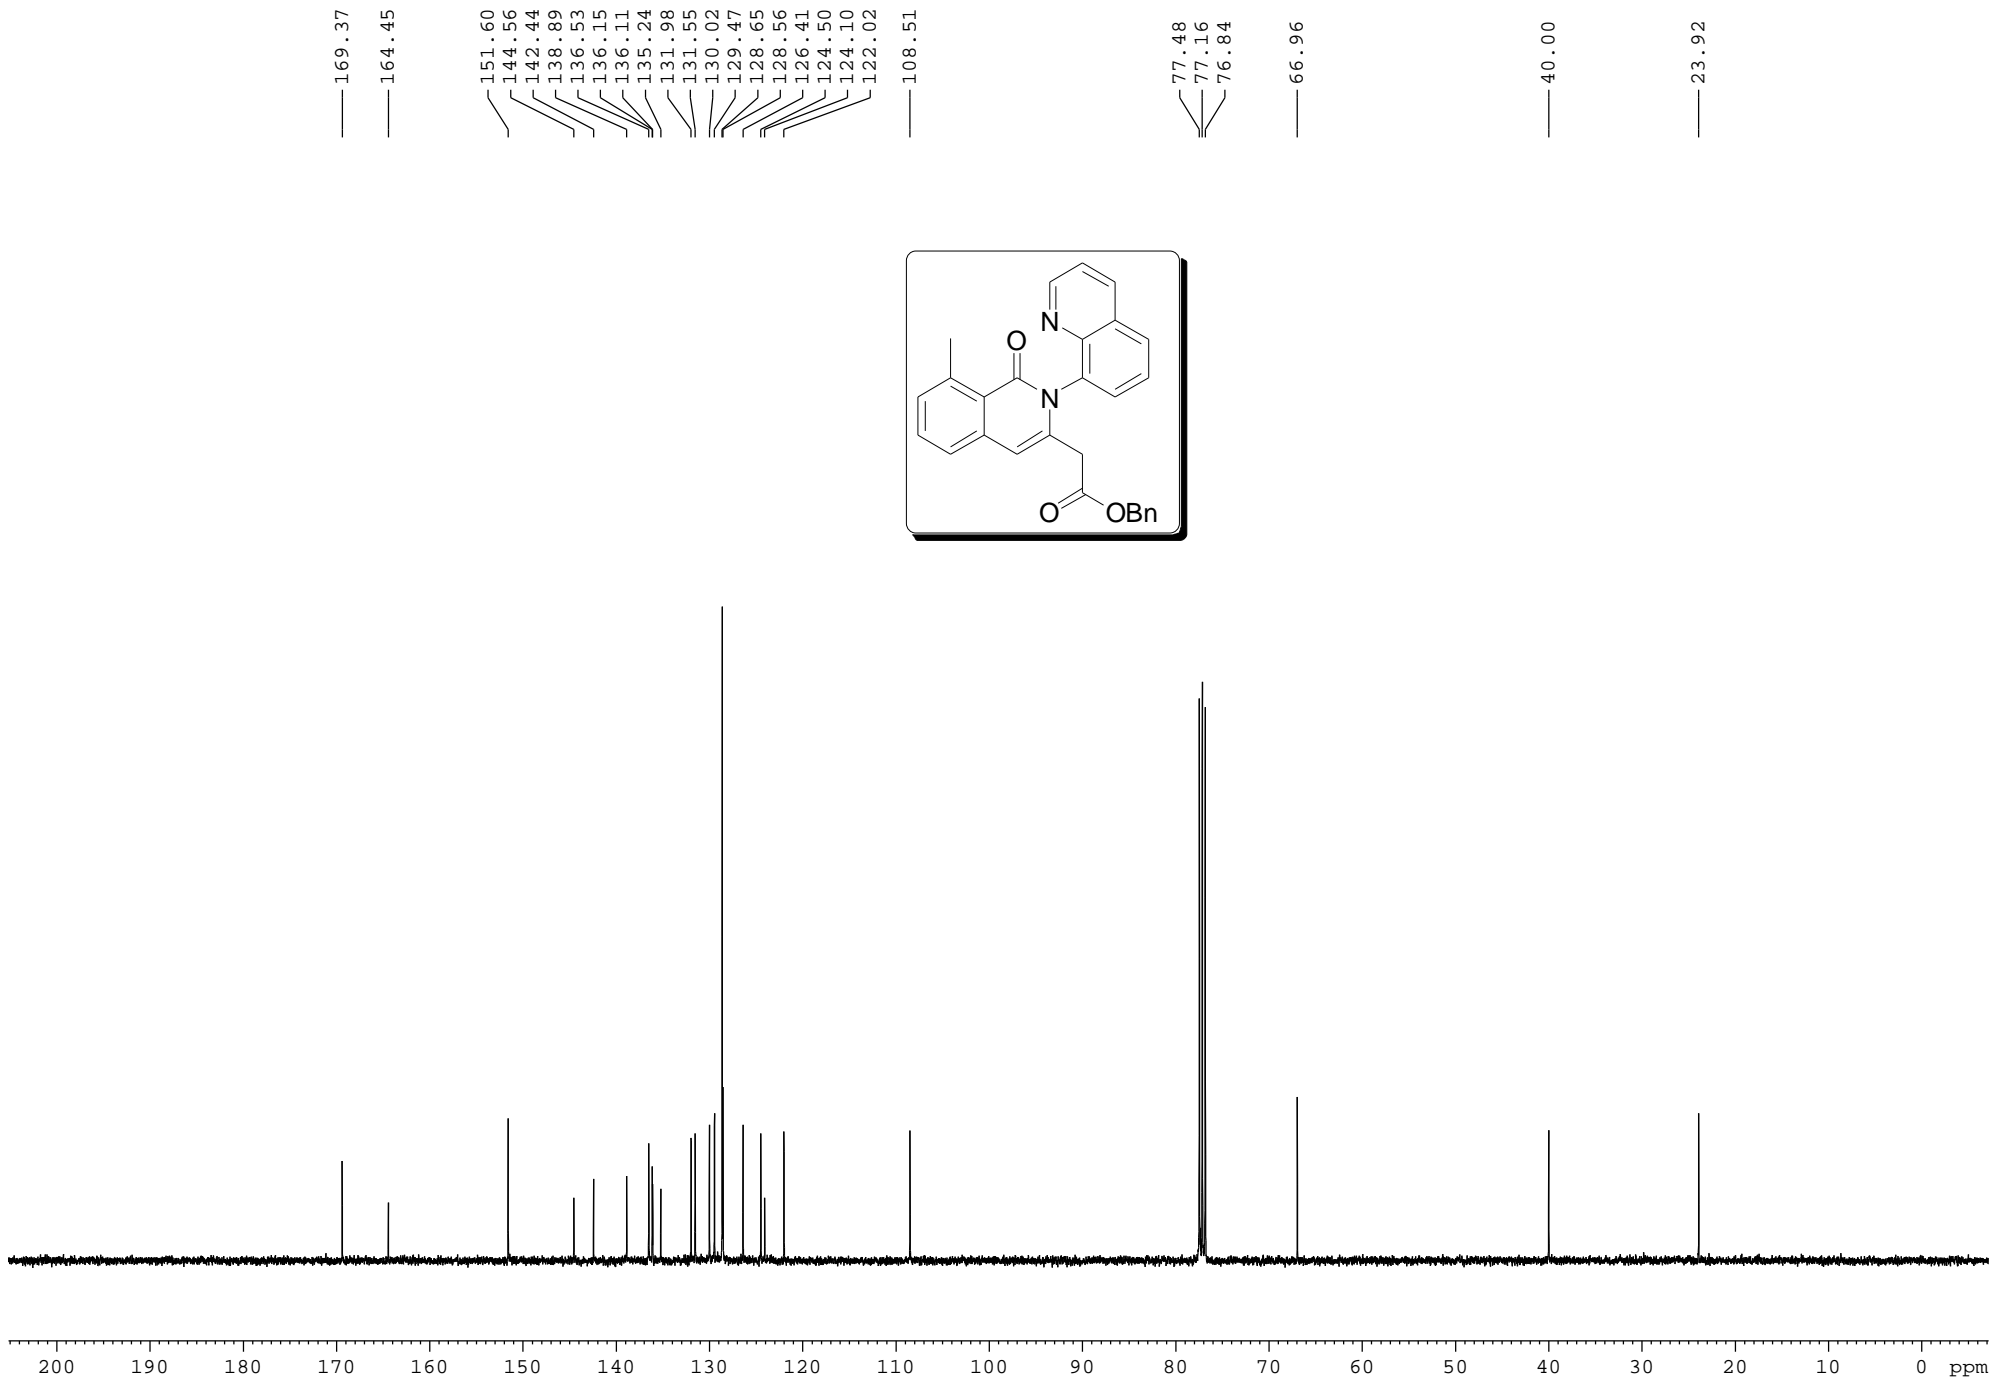

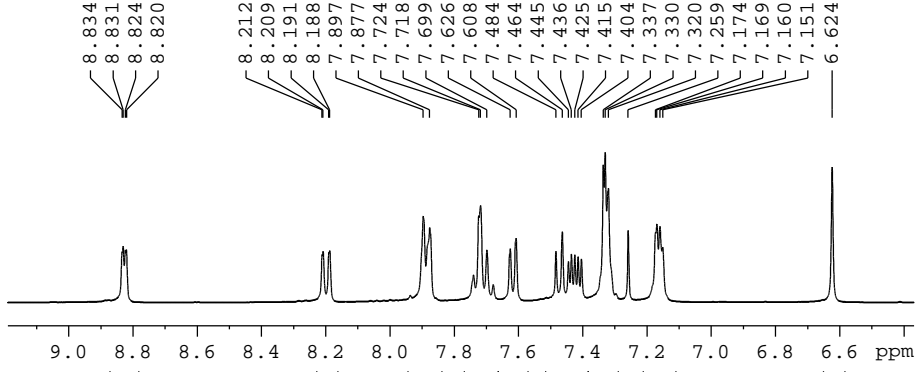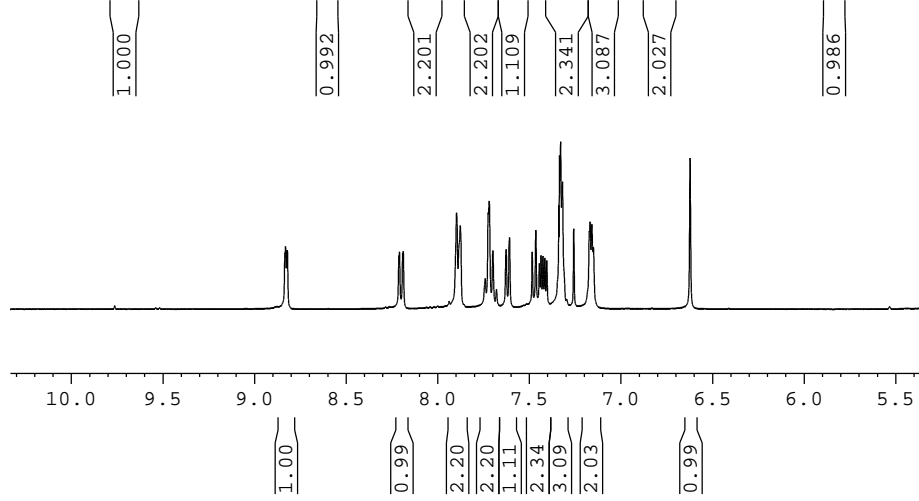

8.8340  
8.8306  
8.8238  
8.8203  
8.2118  
8.2087  
8.1911  
8.1879  
7.8971  
7.8768  
7.7243  
7.7184  
7.6987  
7.6258  
7.6076  
7.4840  
7.4640  
7.4450  
7.4357  
7.4252  
7.4149  
7.4045  
7.3365  
7.3305  
7.3204  
7.2590  
7.1739  
7.1694  
7.1600  
7.1512  
6.6239

4.8981

3.4184  
3.3759  
3.1210  
3.0787

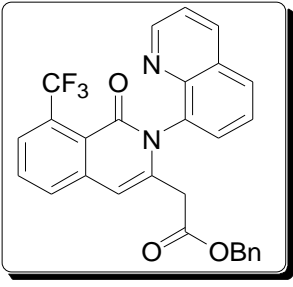



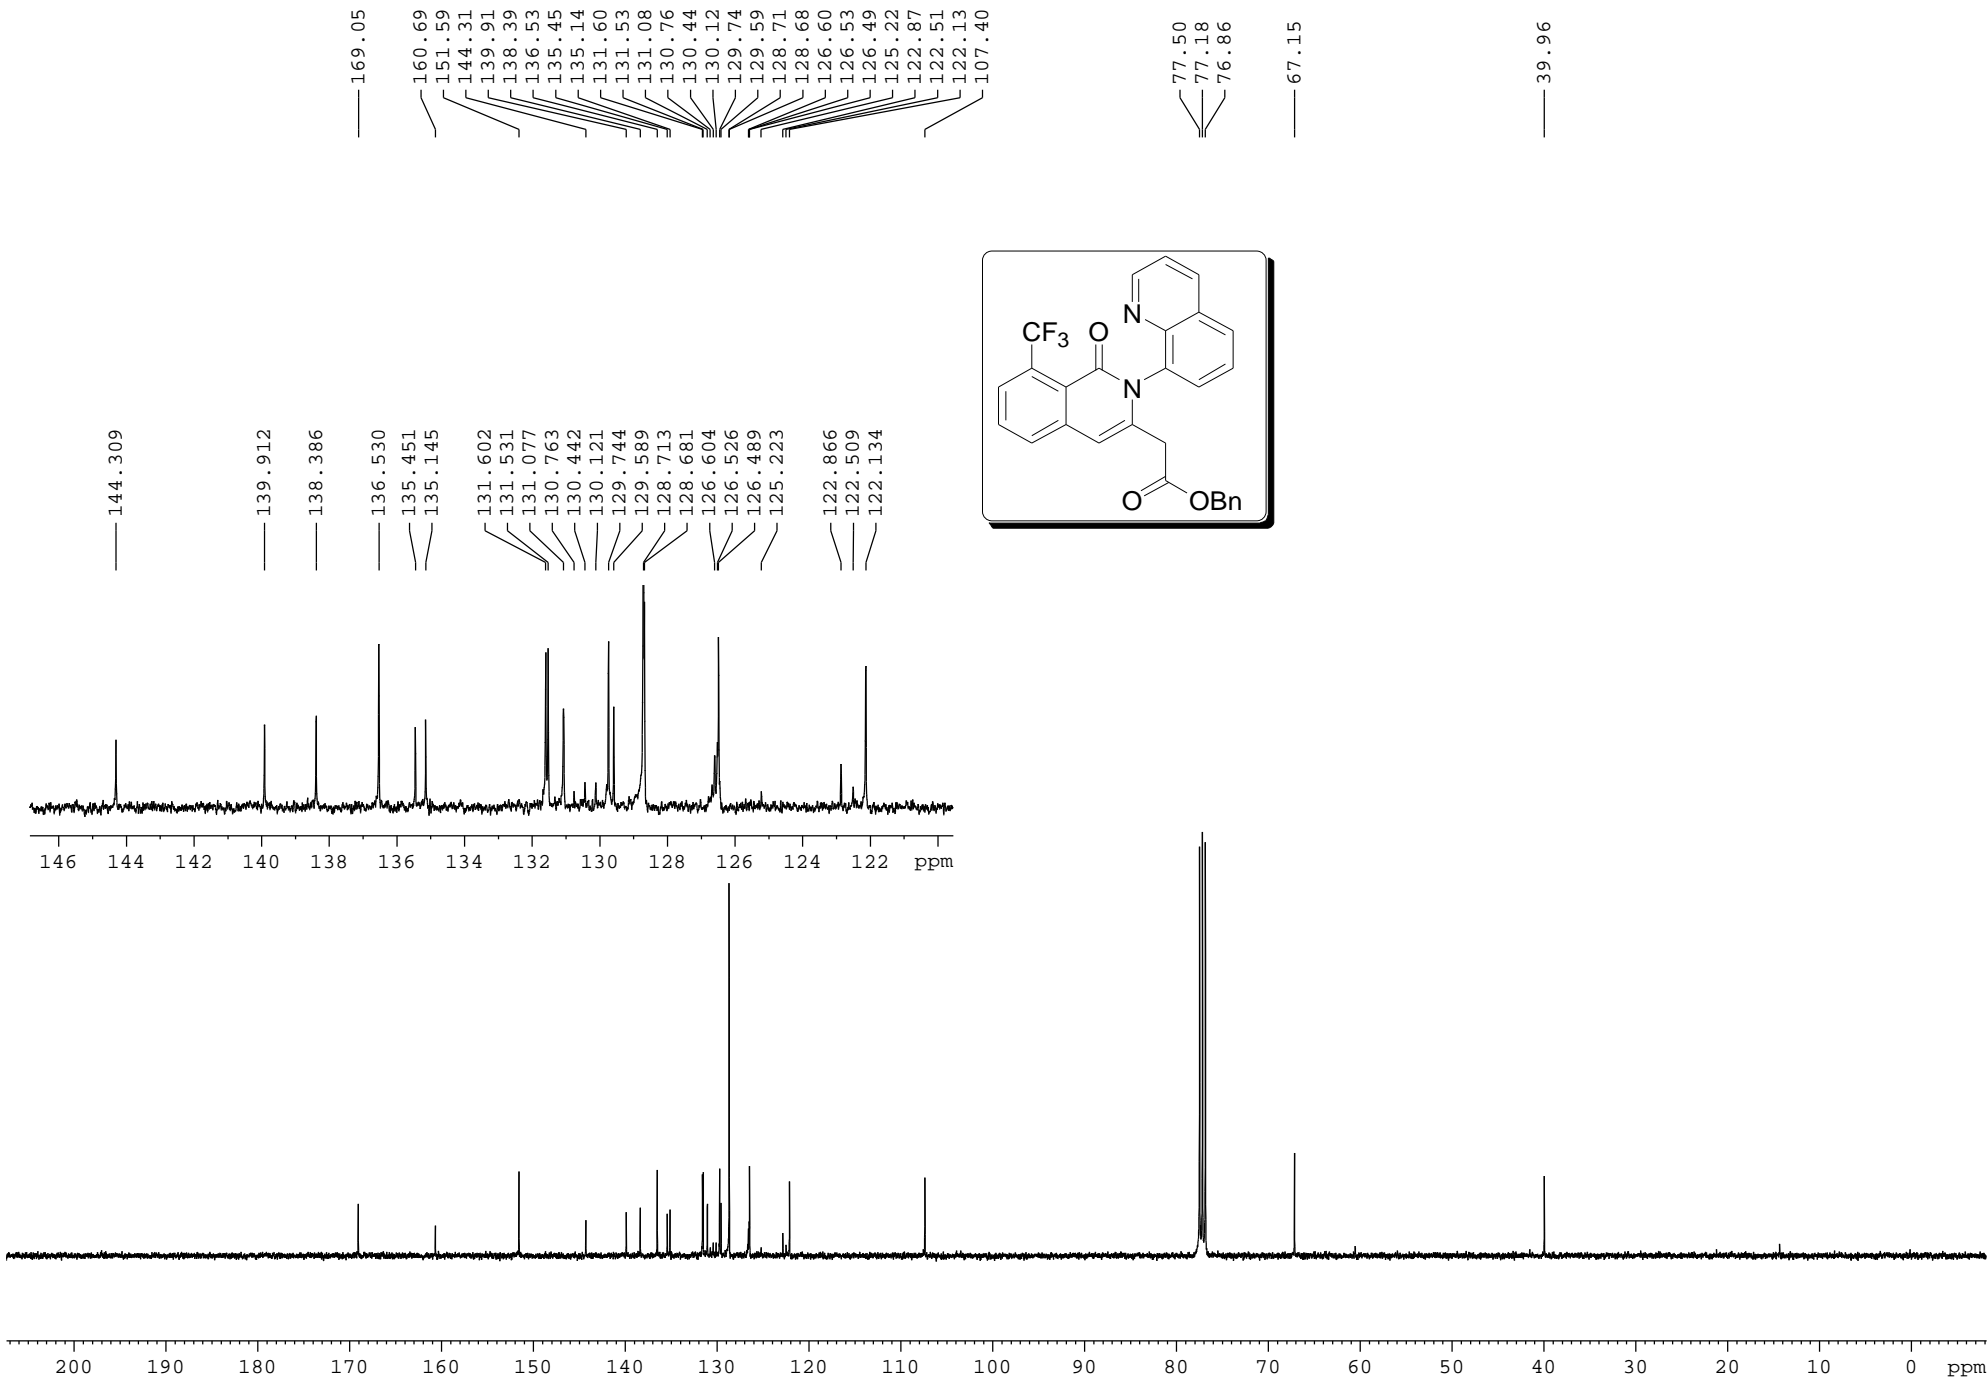

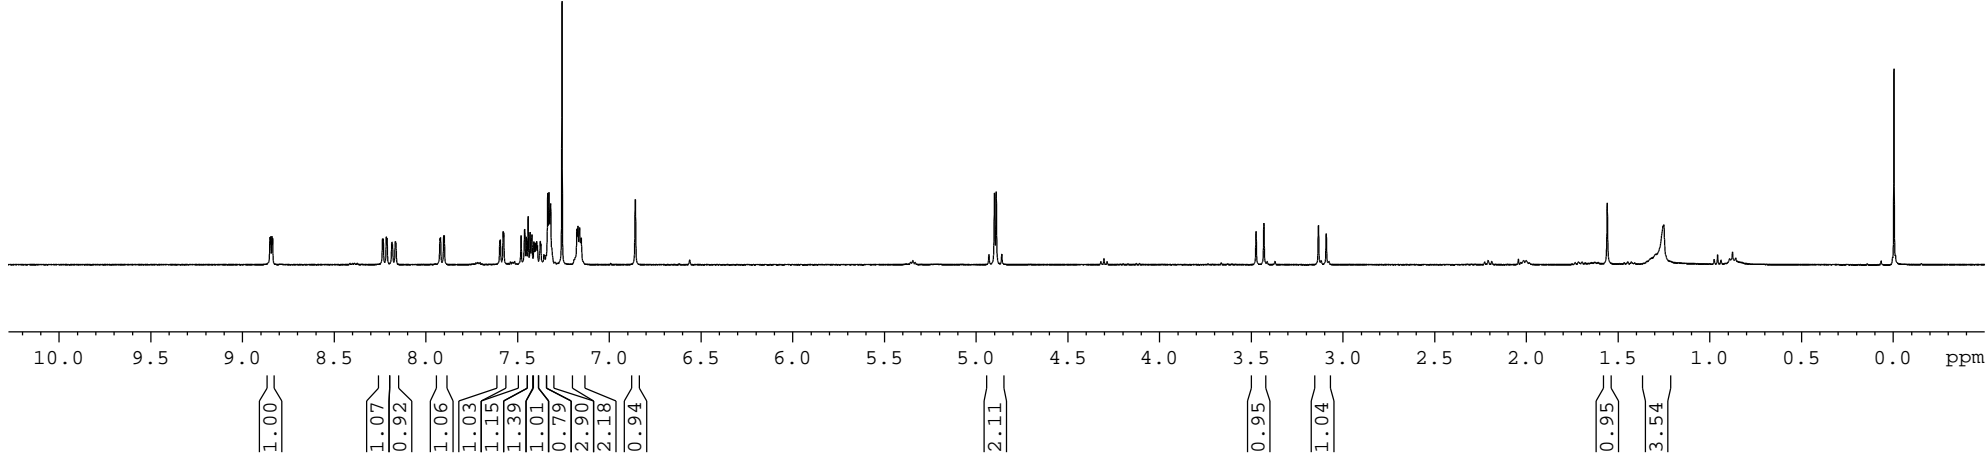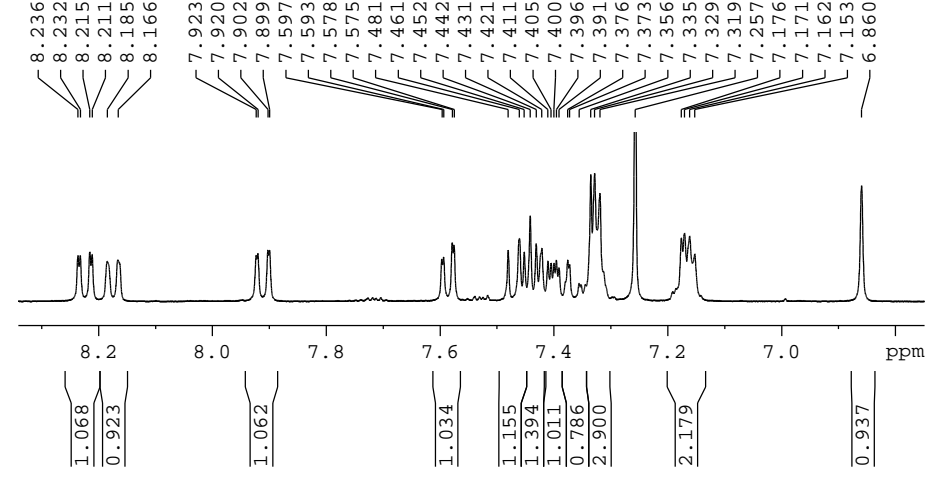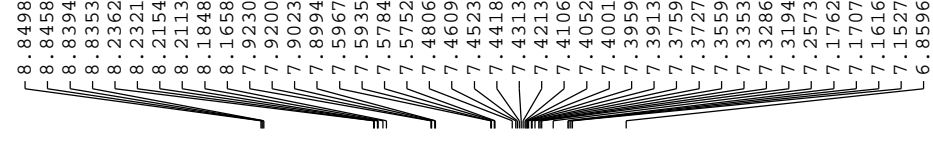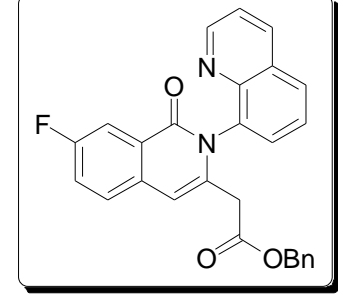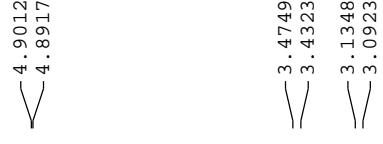

8.8500  
8.8458  
8.8395  
8.8354  
8.8392  
8.8352  
8.8385  
8.82345  
8.82177  
8.82136  
7.9365  
7.9338  
7.9268  
7.9235  
7.9172  
7.9144  
7.9061  
7.9030  
7.5972  
7.5939  
7.5789  
7.5756  
7.4808  
7.4607  
7.4557  
7.4450  
7.4421  
7.4349  
7.4244  
7.3461  
7.3399  
7.3328  
7.3262  
7.3069  
7.2597  
7.1840  
7.1782  
7.1693  
7.1603  
6.9995

4.9421  
4.9118  
4.8975  
4.8672

3.5169  
3.4743

3.1509  
3.1084

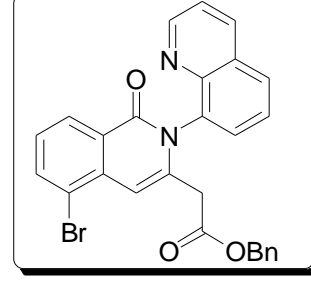

8.850  
8.846  
8.839  
8.835

8.379  
8.359  
8.239  
8.235  
8.218  
8.214  
7.936  
7.934  
7.927  
7.923  
7.917  
7.914  
7.906  
7.903  
7.597  
7.594  
7.579  
7.576  
7.481  
7.461  
7.456  
7.445  
7.442  
7.435  
7.424  
7.346  
7.340  
7.333  
7.326  
7.307  
7.260  
7.184

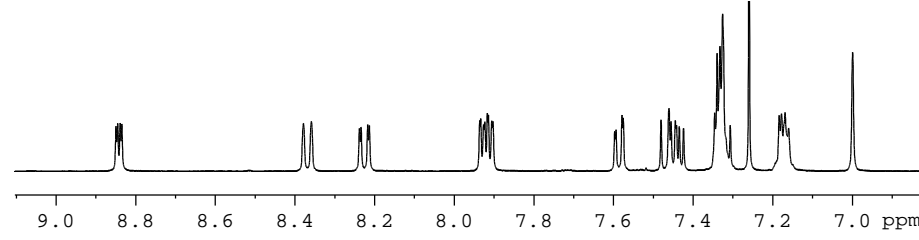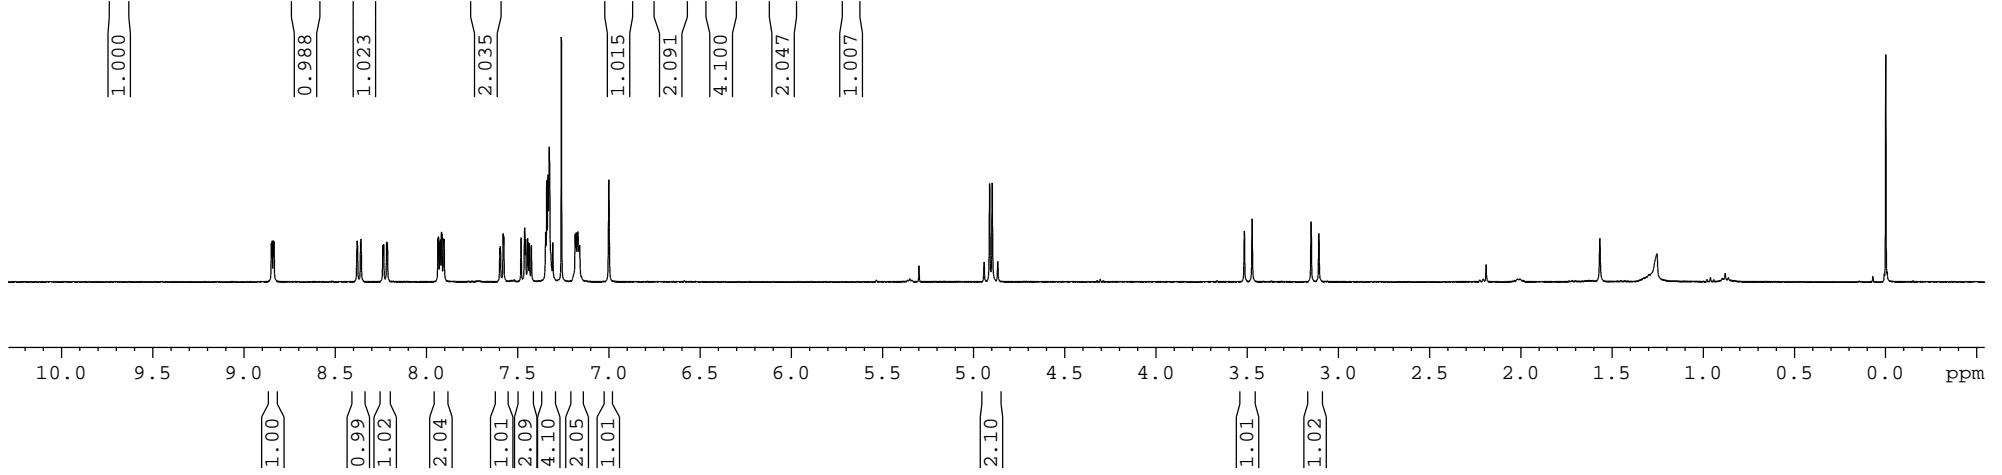

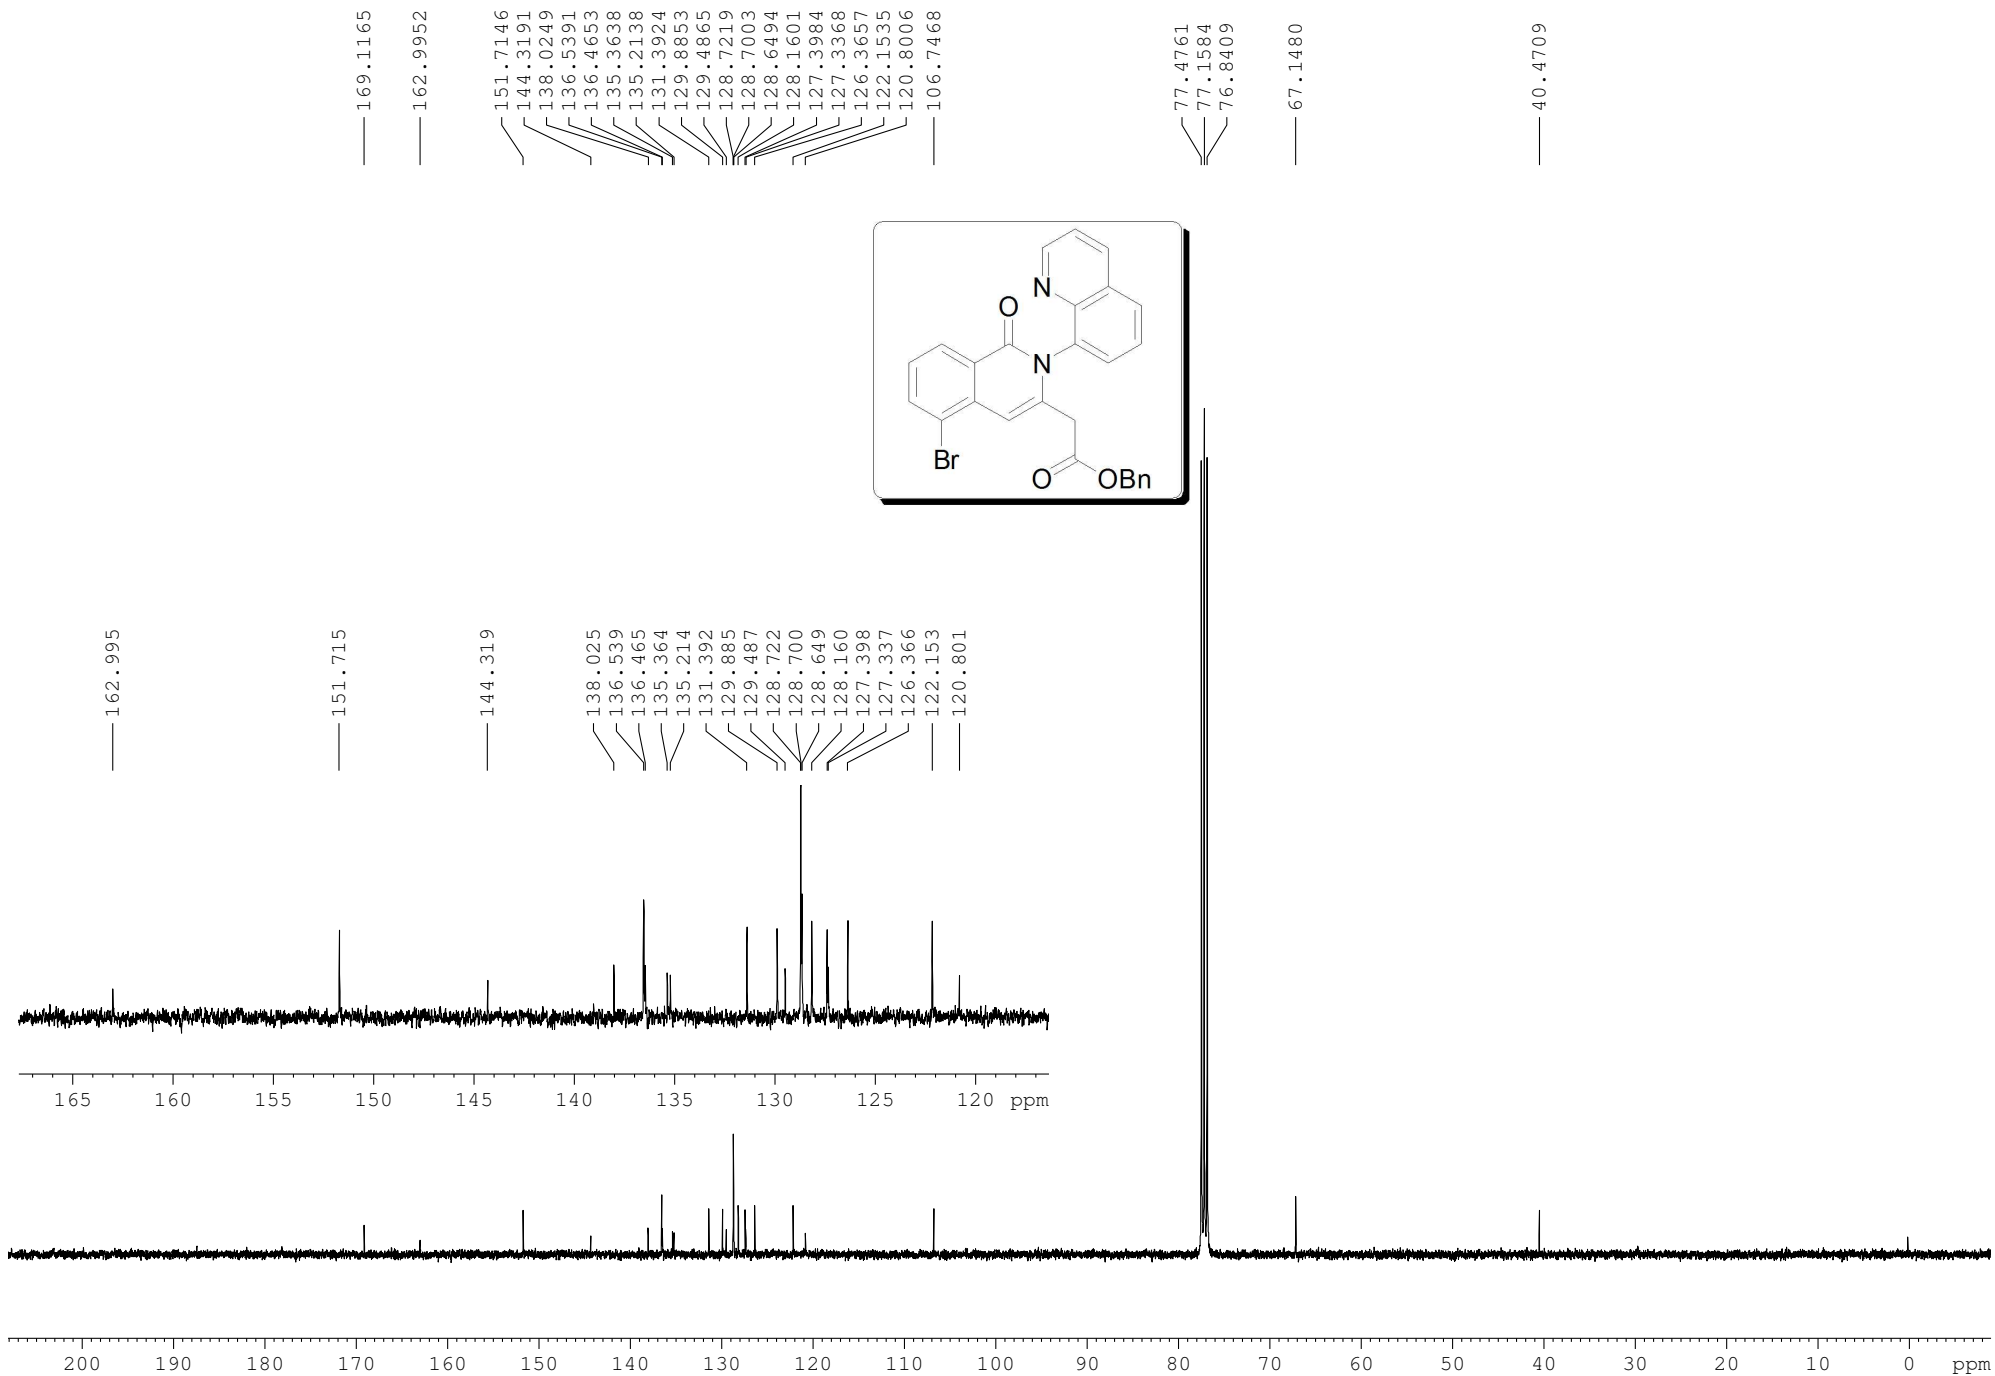

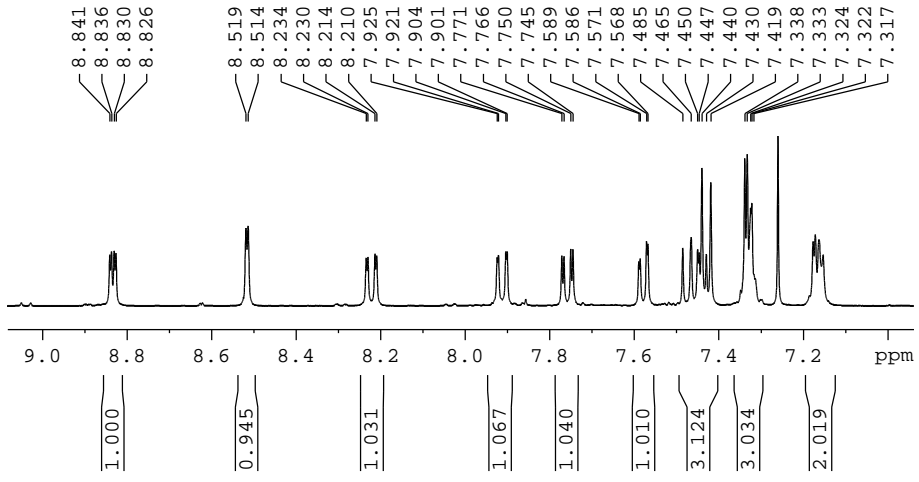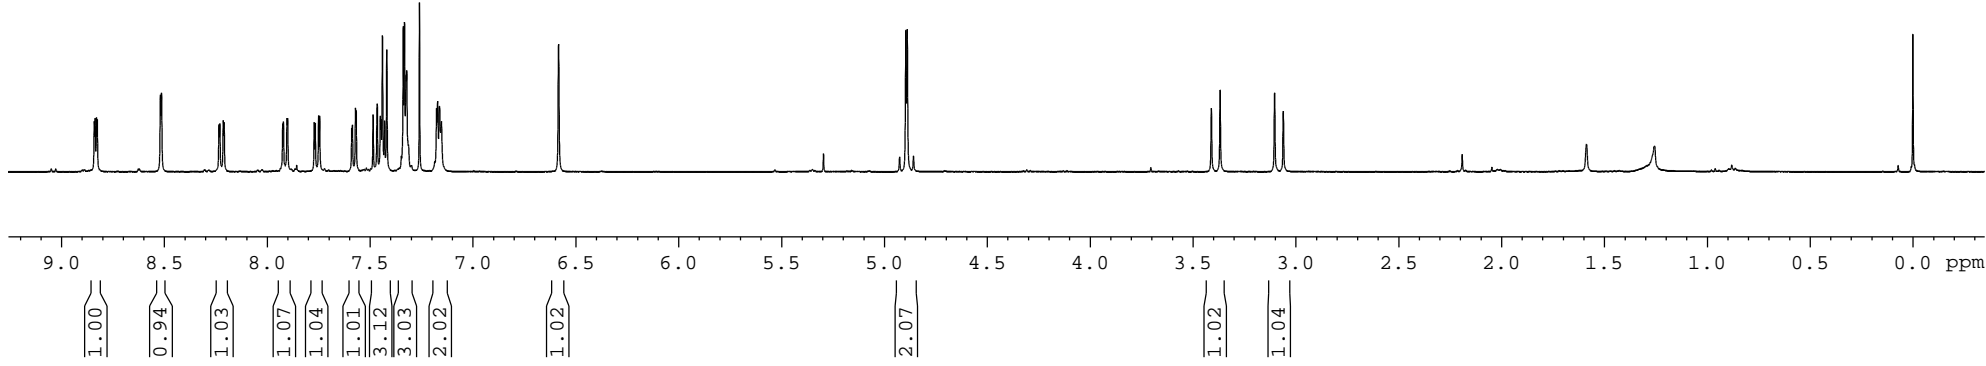

8.2136  
8.2096  
7.9245  
7.9214  
7.9039  
7.9008  
7.7714  
7.7662  
7.7503  
7.7451  
7.5892  
7.5859  
7.5709  
7.5676  
7.4853  
7.4652  
7.4501  
7.4465  
7.4398  
7.4295  
7.4188  
7.3385  
7.3326  
7.3245  
7.3218  
7.3167  
7.3134  
7.2598  
7.1767  
7.1715  
7.1627  
7.1530  
6.5851

4.9275  
4.8971  
4.8904  
4.8600

3.4119  
3.3693  
3.1046  
3.0622

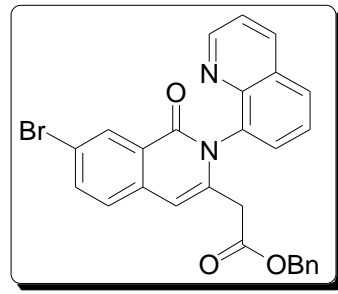

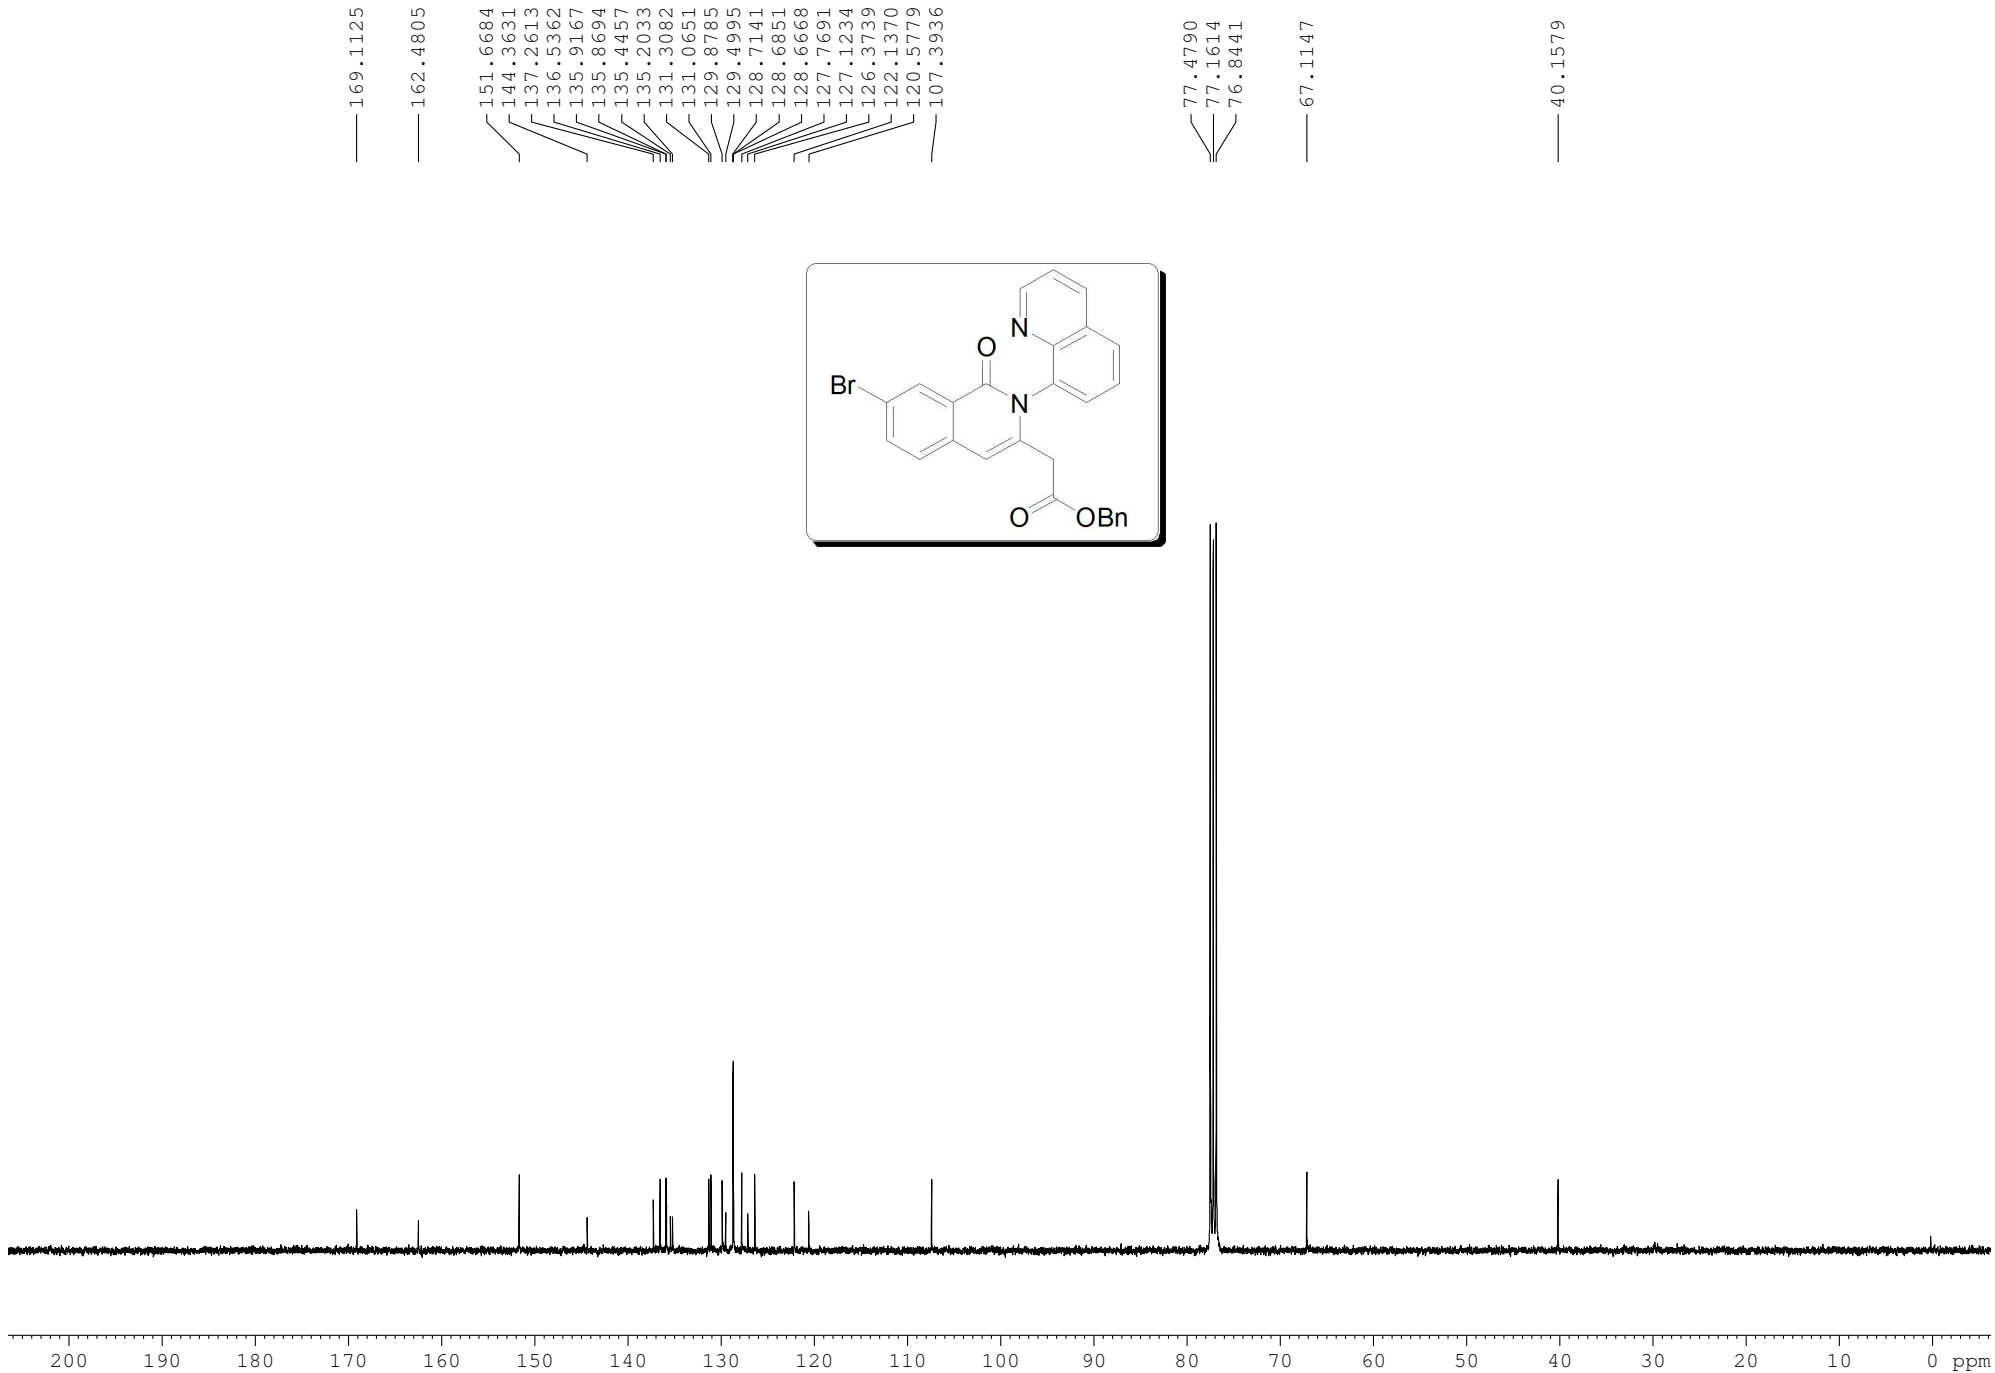

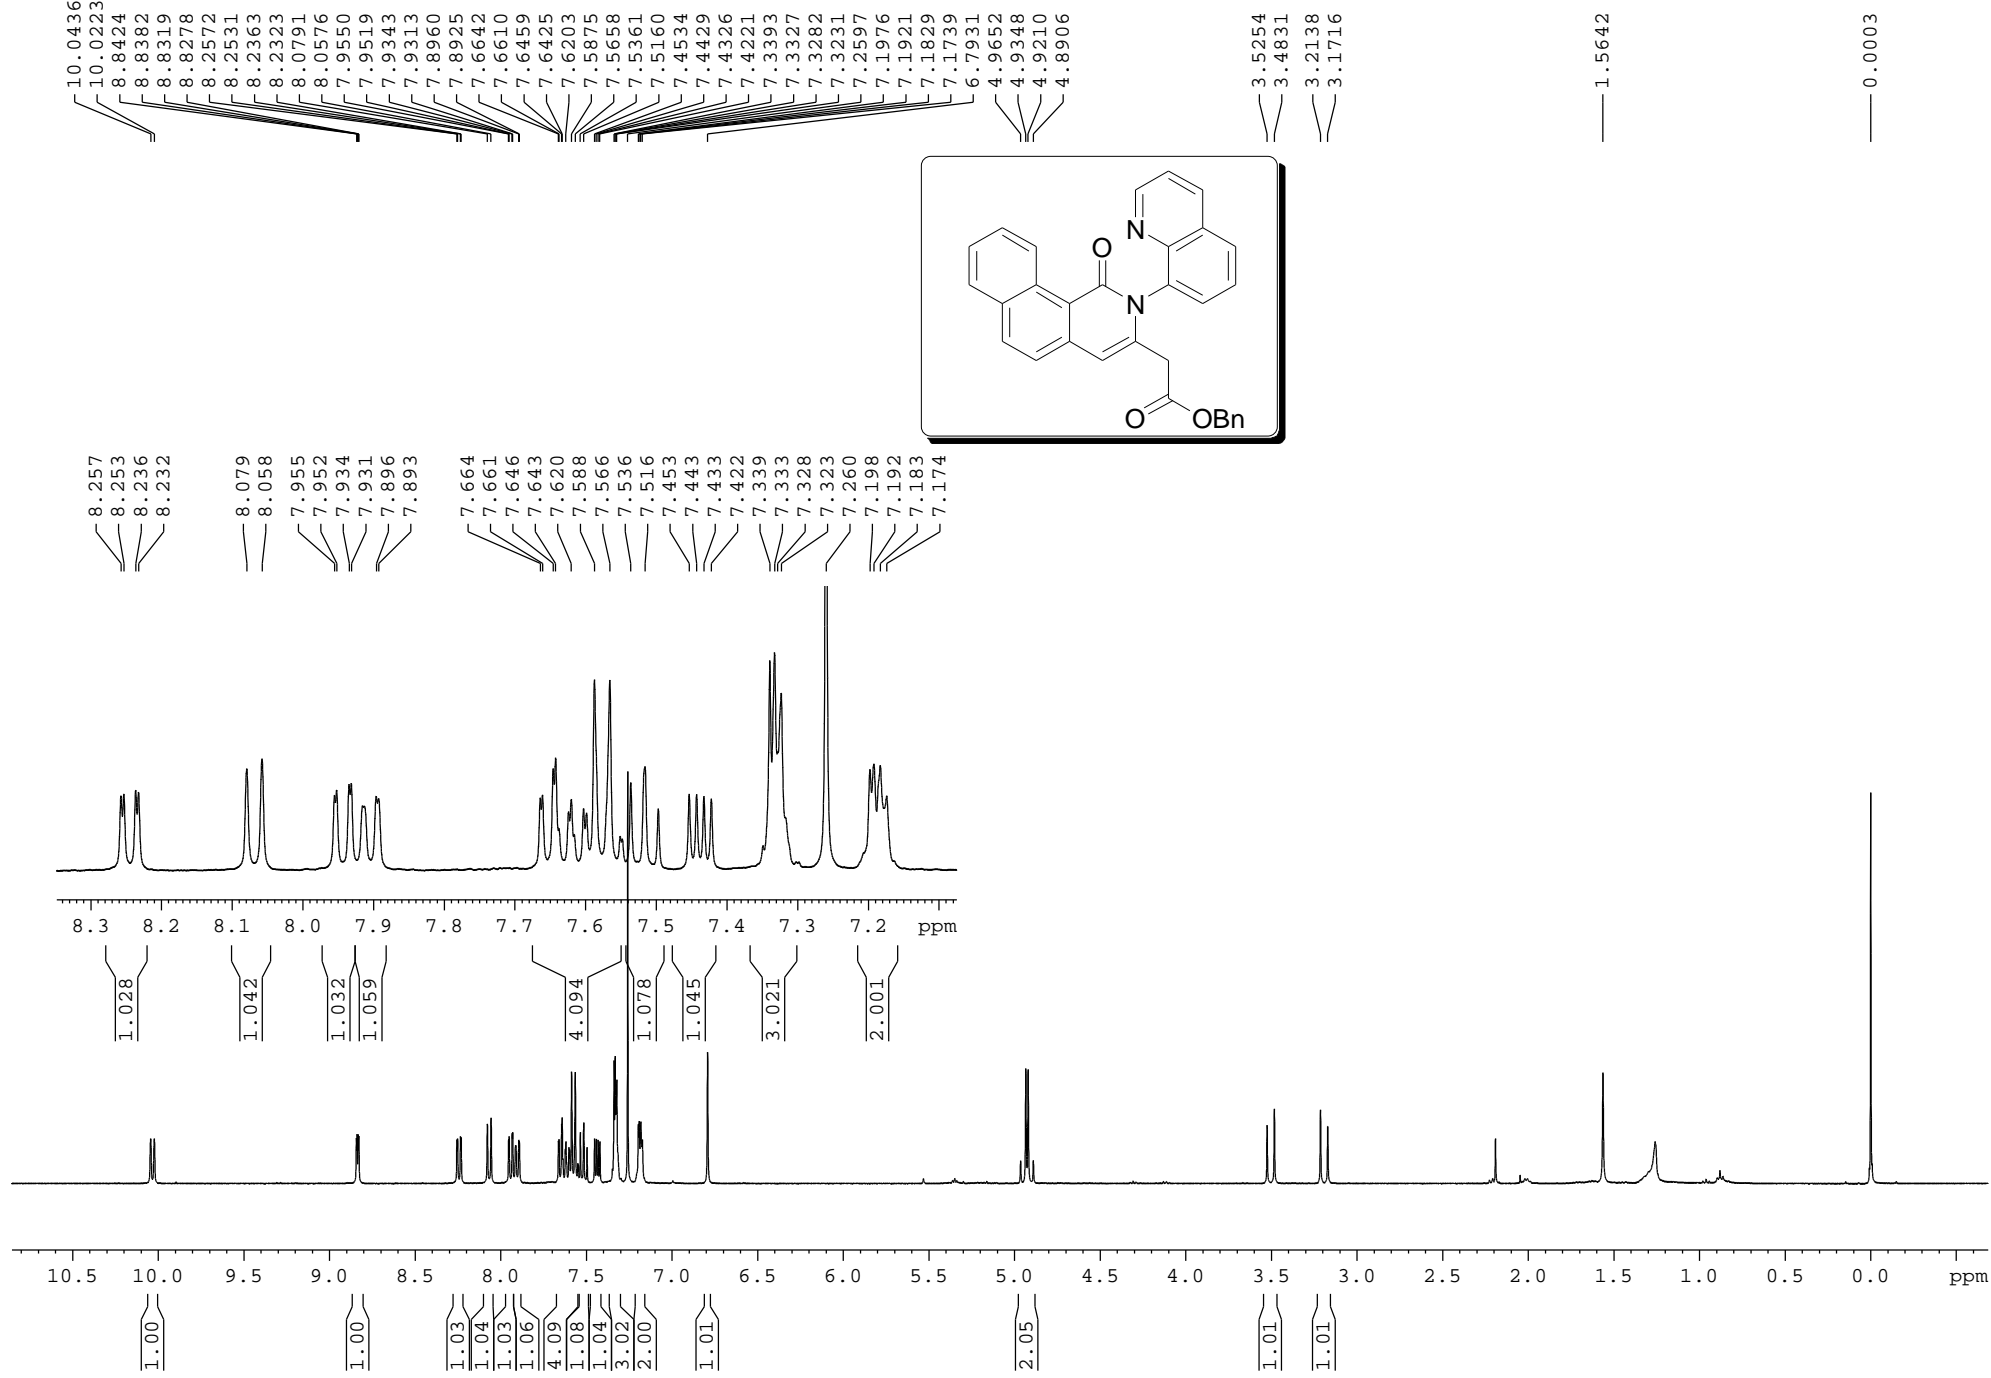

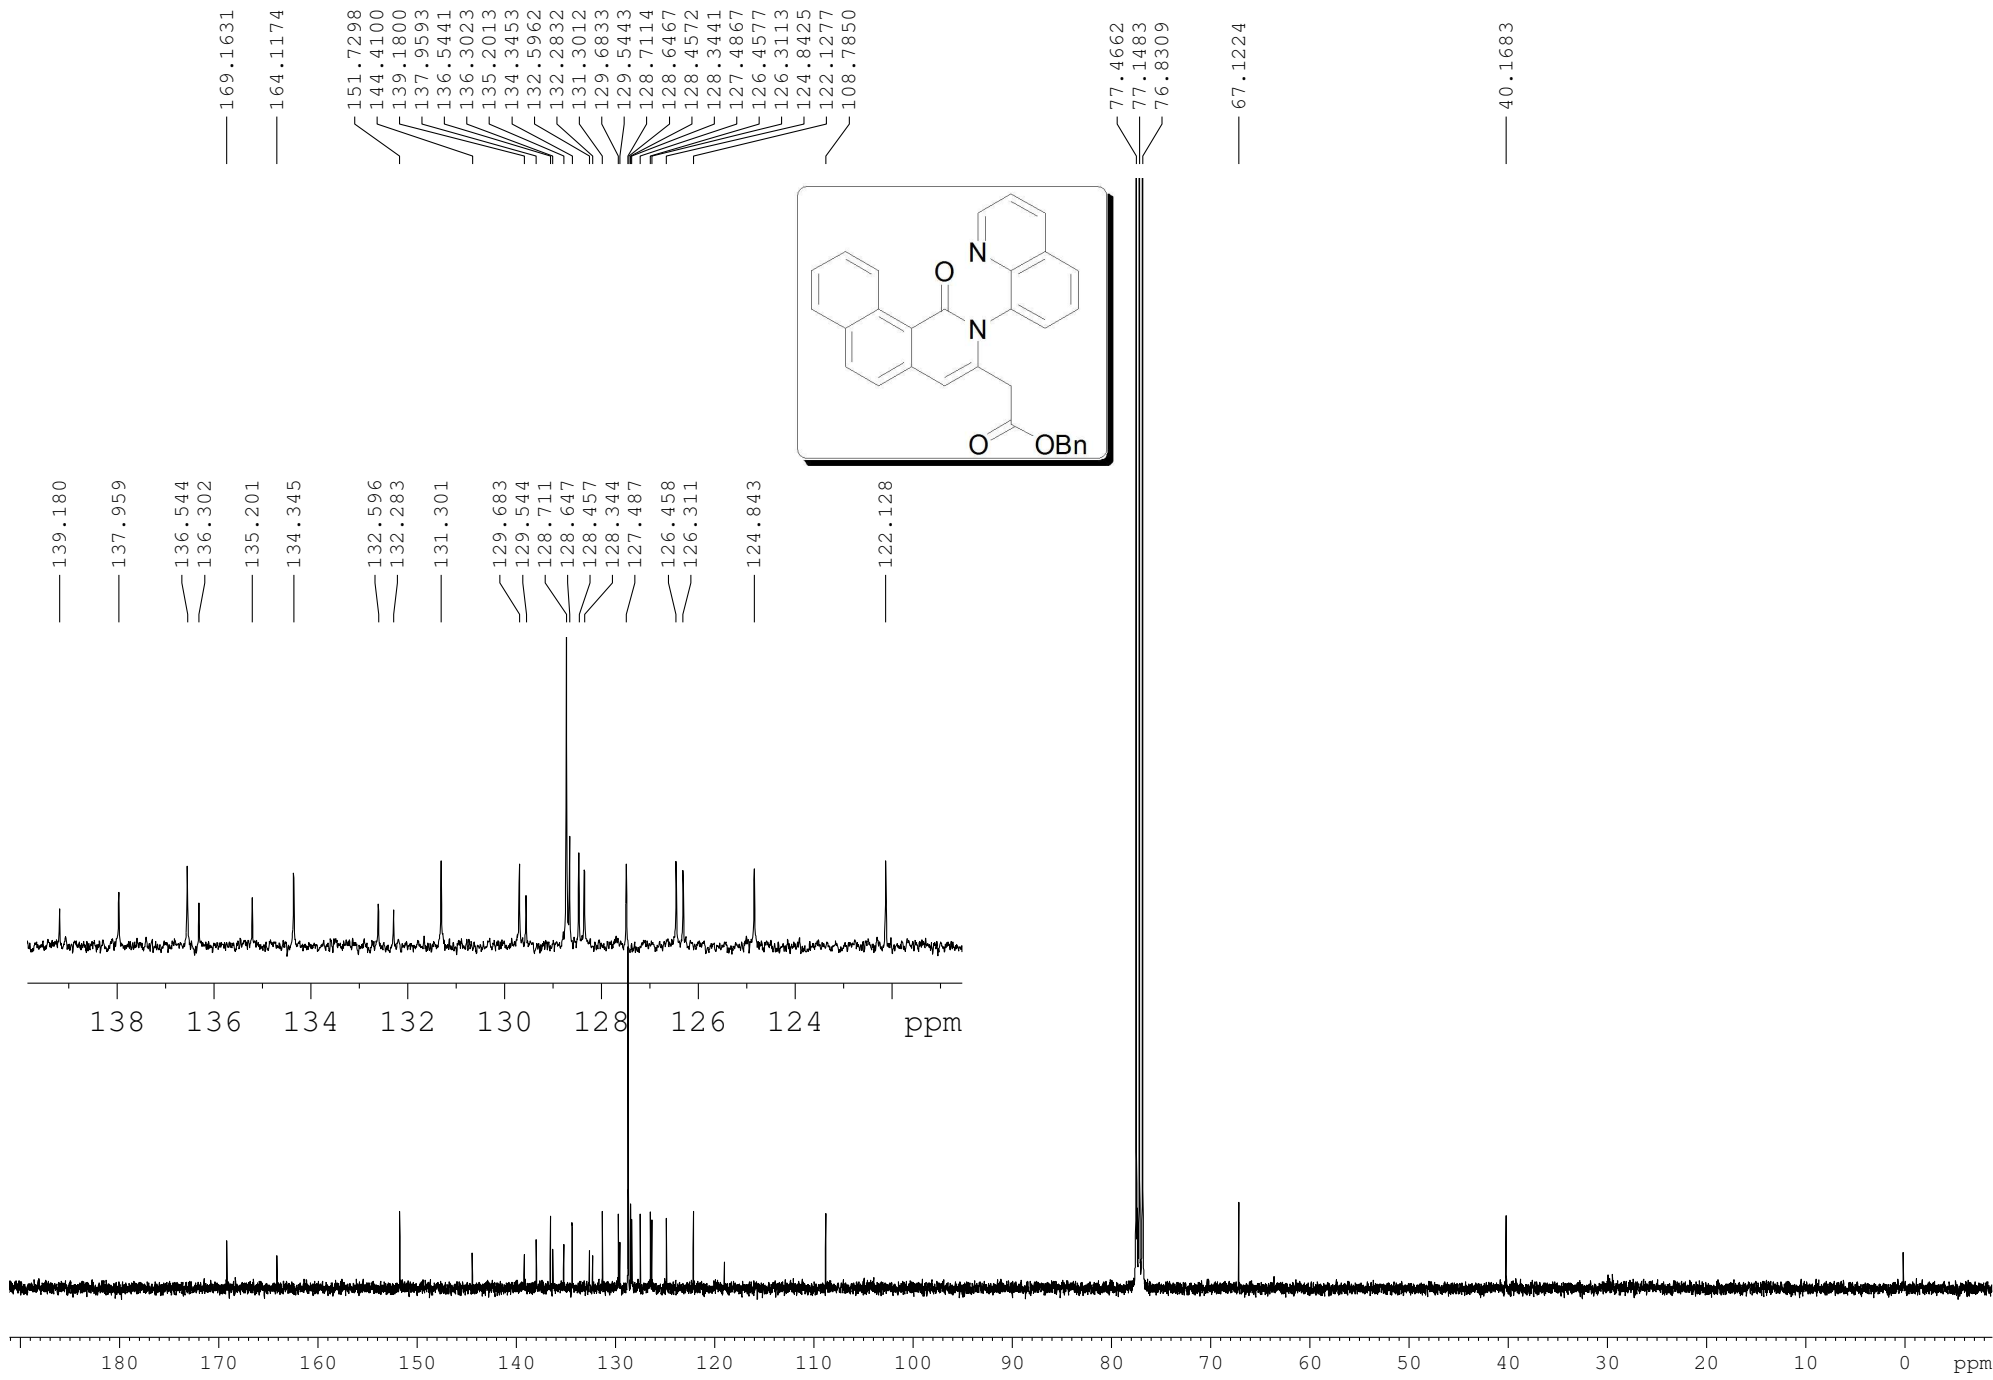



8.8514  
8.8472  
8.8410  
8.8368  
8.2347  
8.2306  
8.2139  
8.2097  
8.0498  
8.0289  
8.0188  
7.9649  
7.9441  
7.9241  
7.9209  
7.9034  
7.9002  
7.6496  
7.6462  
7.6313  
7.6279  
7.5896  
7.5013  
7.4976  
7.4946  
7.4809  
7.4626  
7.4401  
7.4296  
7.4193  
7.4088  
7.3328  
7.3259  
7.3219  
7.3165  
7.2567  
7.1880  
7.1822  
7.1732  
7.1641  
6.7475

4.9364  
4.9059  
4.8958  
4.8654

3.4568  
3.4143  
3.1504  
3.1081

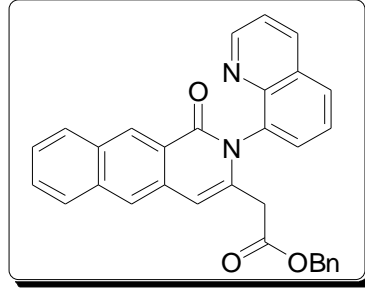

8.235  
8.231  
8.214  
8.210  
8.050  
8.029  
8.019  
7.965  
7.944  
7.924  
7.921  
7.903  
7.900  
7.650  
7.646  
7.631  
7.628  
7.590  
7.501  
7.498  
7.495  
7.481  
7.463  
7.440  
7.430  
7.419  
7.409  
7.333  
7.326  
7.322  
7.316  
7.257  
7.188  
7.182  
7.173  
7.164

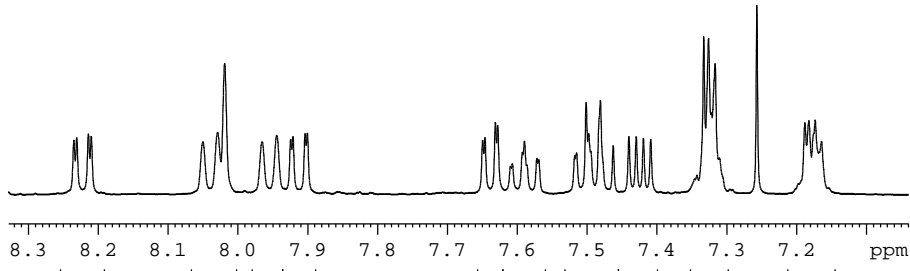

1.074  
2.098  
1.076  
1.064  
1.044  
1.122  
2.099  
1.094  
3.075  
2.025

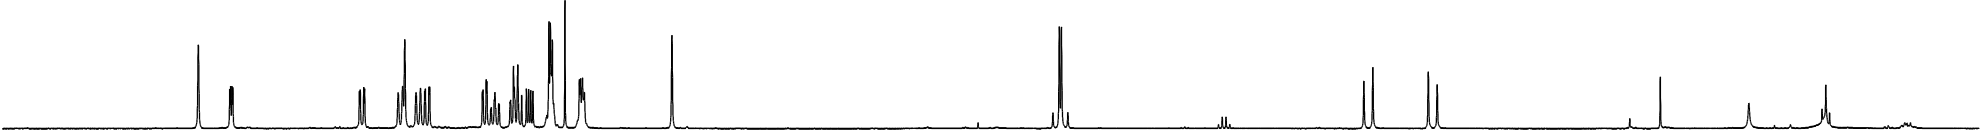

1.00  
1.03  
1.07  
2.10  
1.08  
1.06  
1.04  
1.12  
2.10  
1.09  
3.08  
2.03  
1.00  
2.06  
1.01  
1.02

9.5  
9.0  
8.5  
8.0  
7.5  
7.0  
6.5  
6.0  
5.5  
5.0  
4.5  
4.0  
3.5  
3.0  
2.5  
2.0  
1.5  
1.0  
ppm

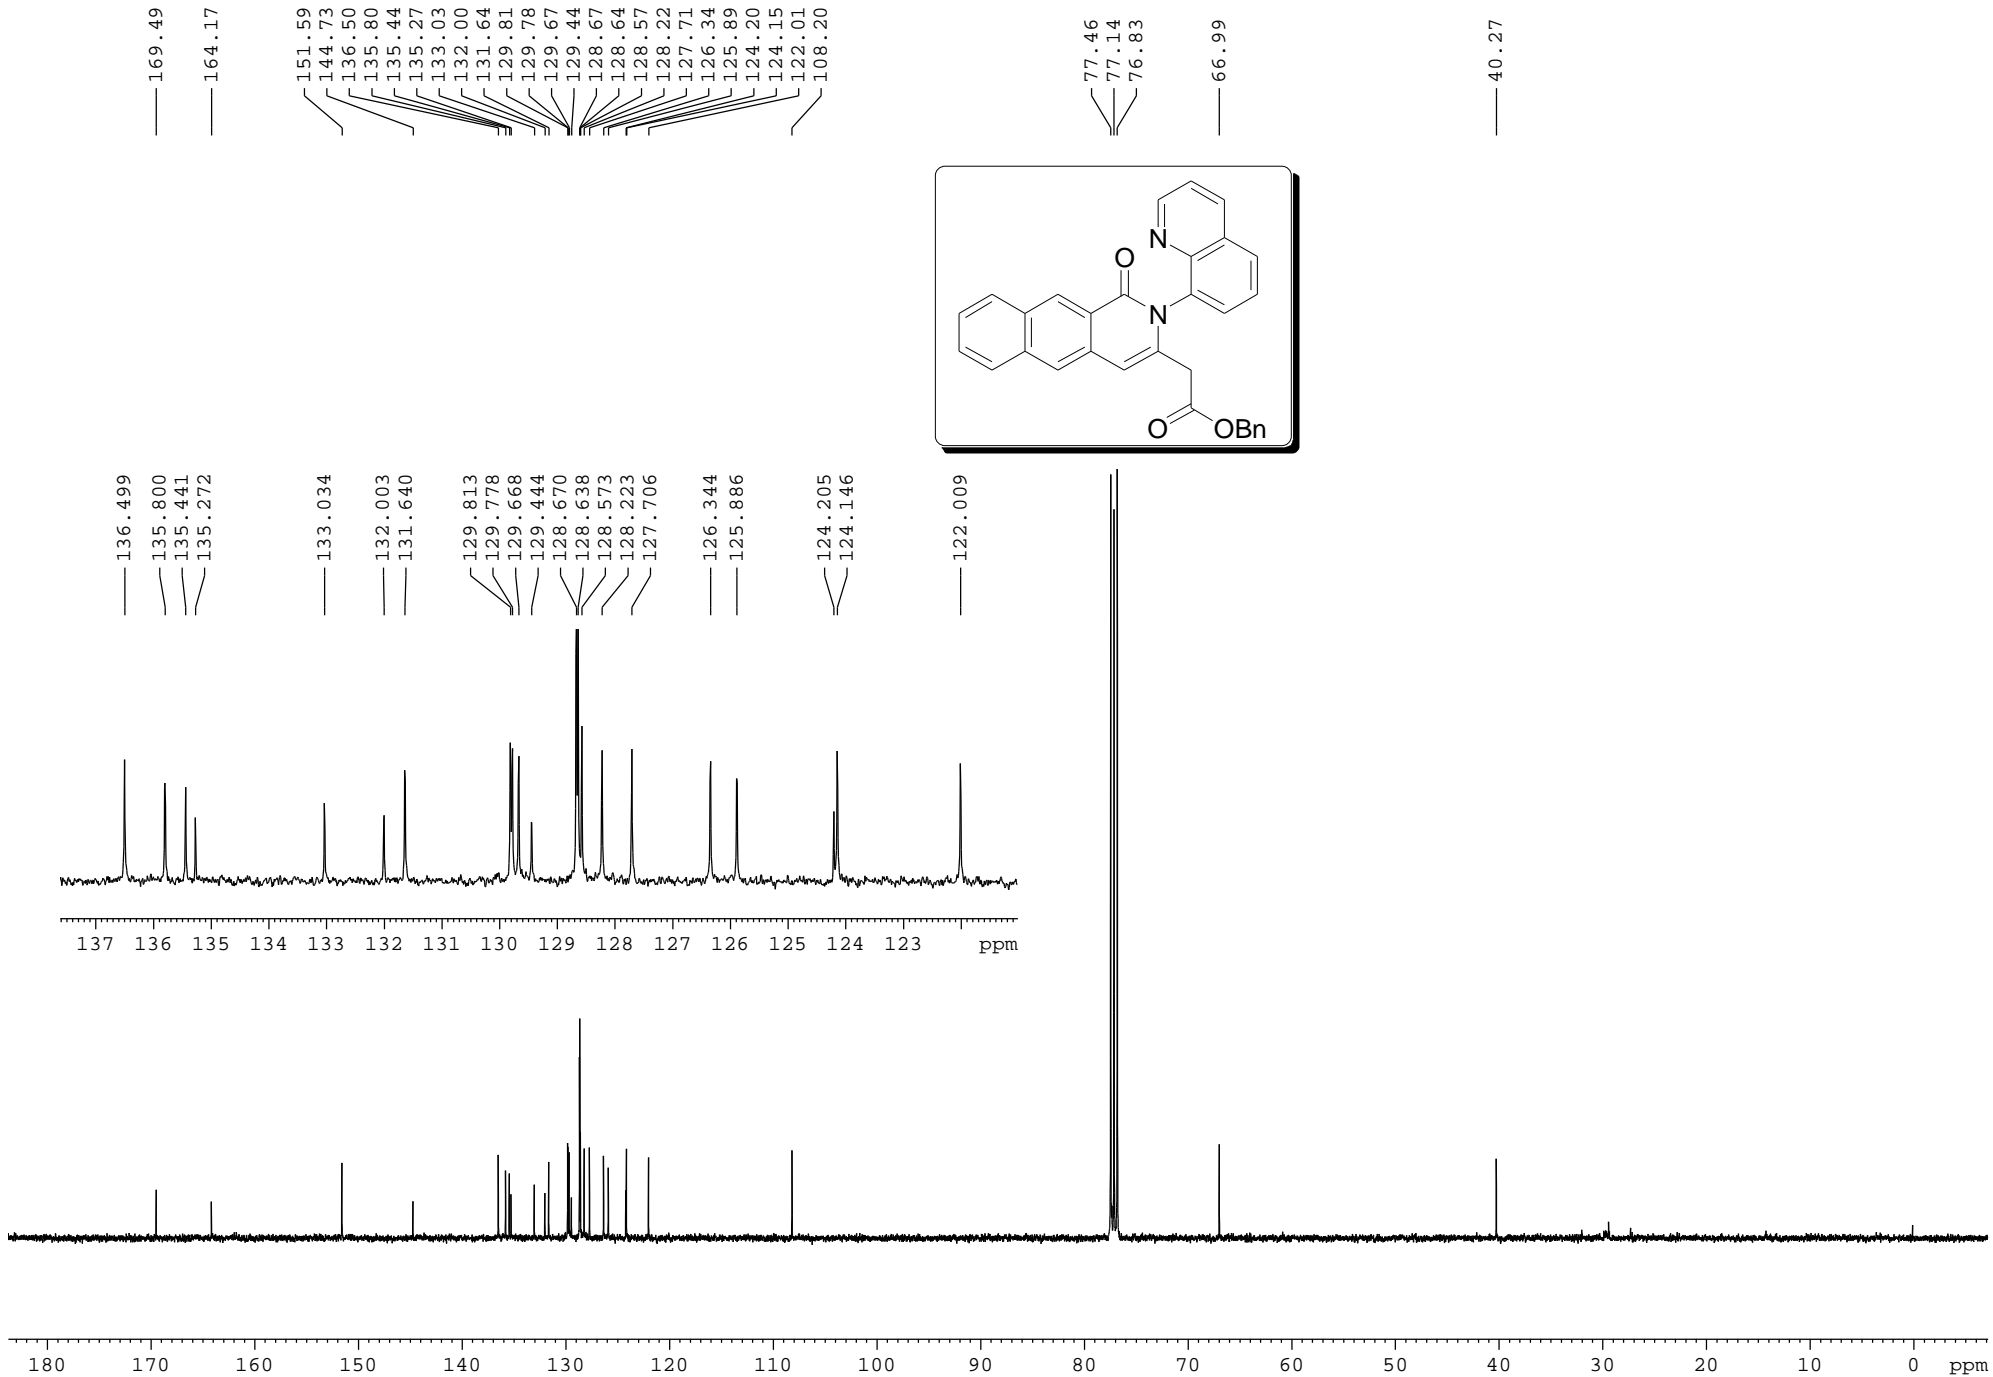

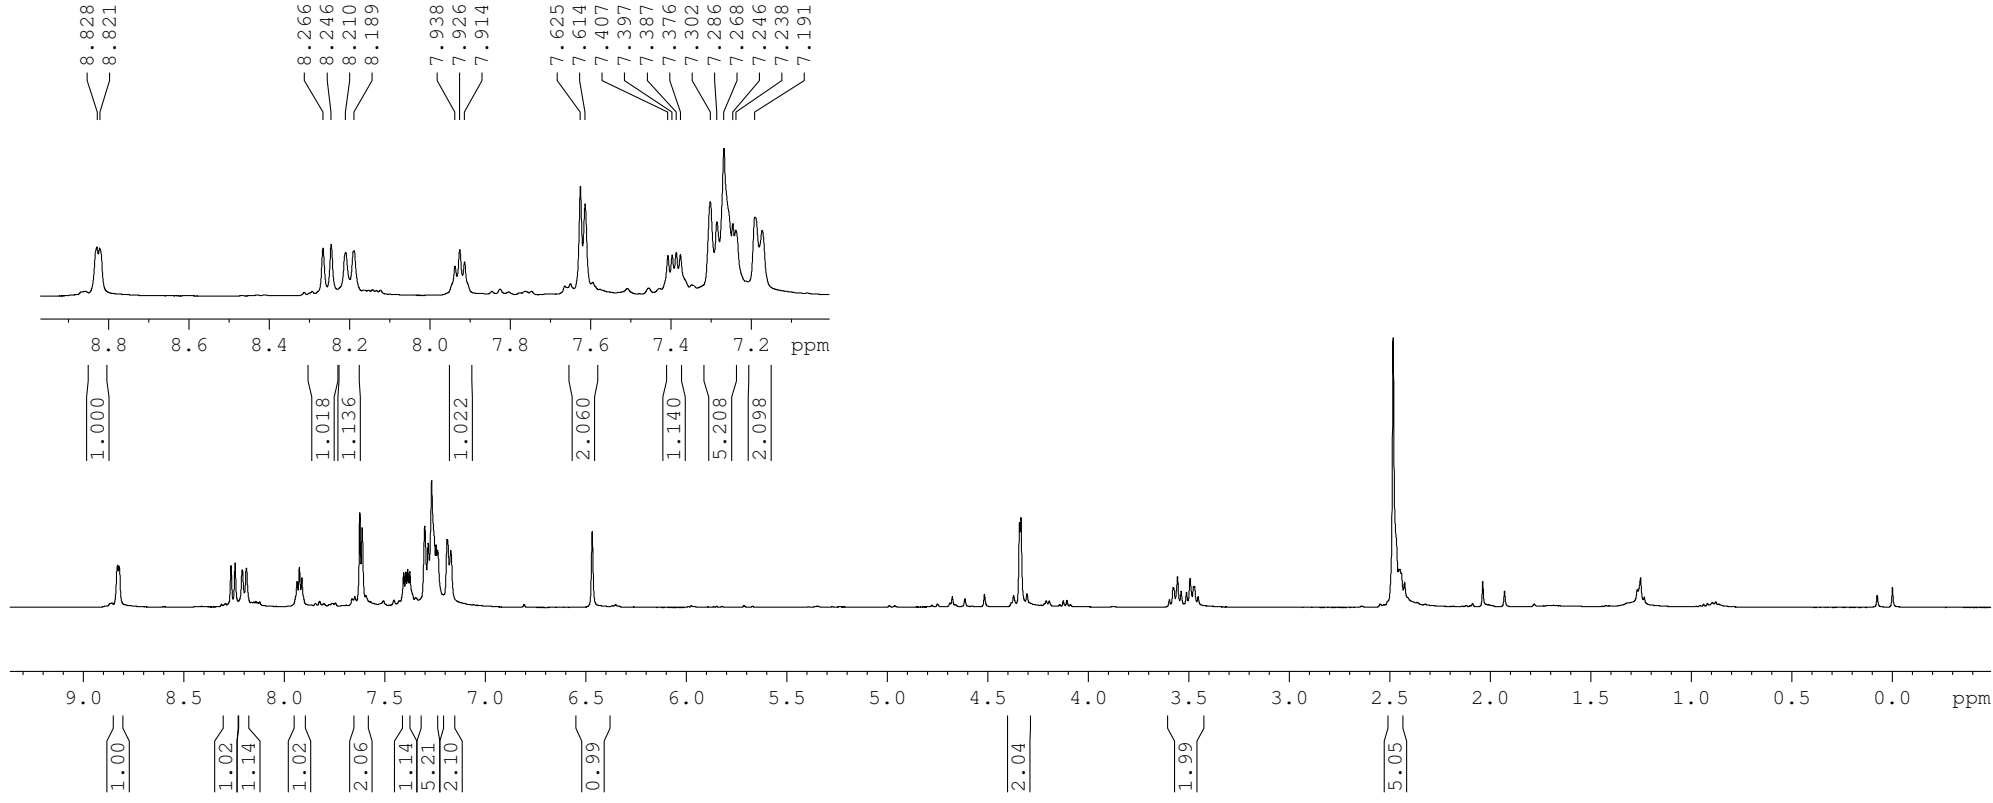

8.8281  
8.8211  
8.2663  
8.2460  
8.2095  
8.1891  
7.9377  
7.9258  
7.9138  
7.6255  
7.6137  
7.4074  
7.3969  
7.3867  
7.3763  
7.3021  
7.2856  
7.2680  
7.2459  
7.2382  
7.1910  
7.1728  
6.4692

4.3730  
4.3429  
4.3361  
4.3058  
3.5974  
3.5790  
3.5568  
3.5389  
3.5123  
3.4947  
3.4771  
3.4728  
3.4547

2.4841

0.0756  
0.0000

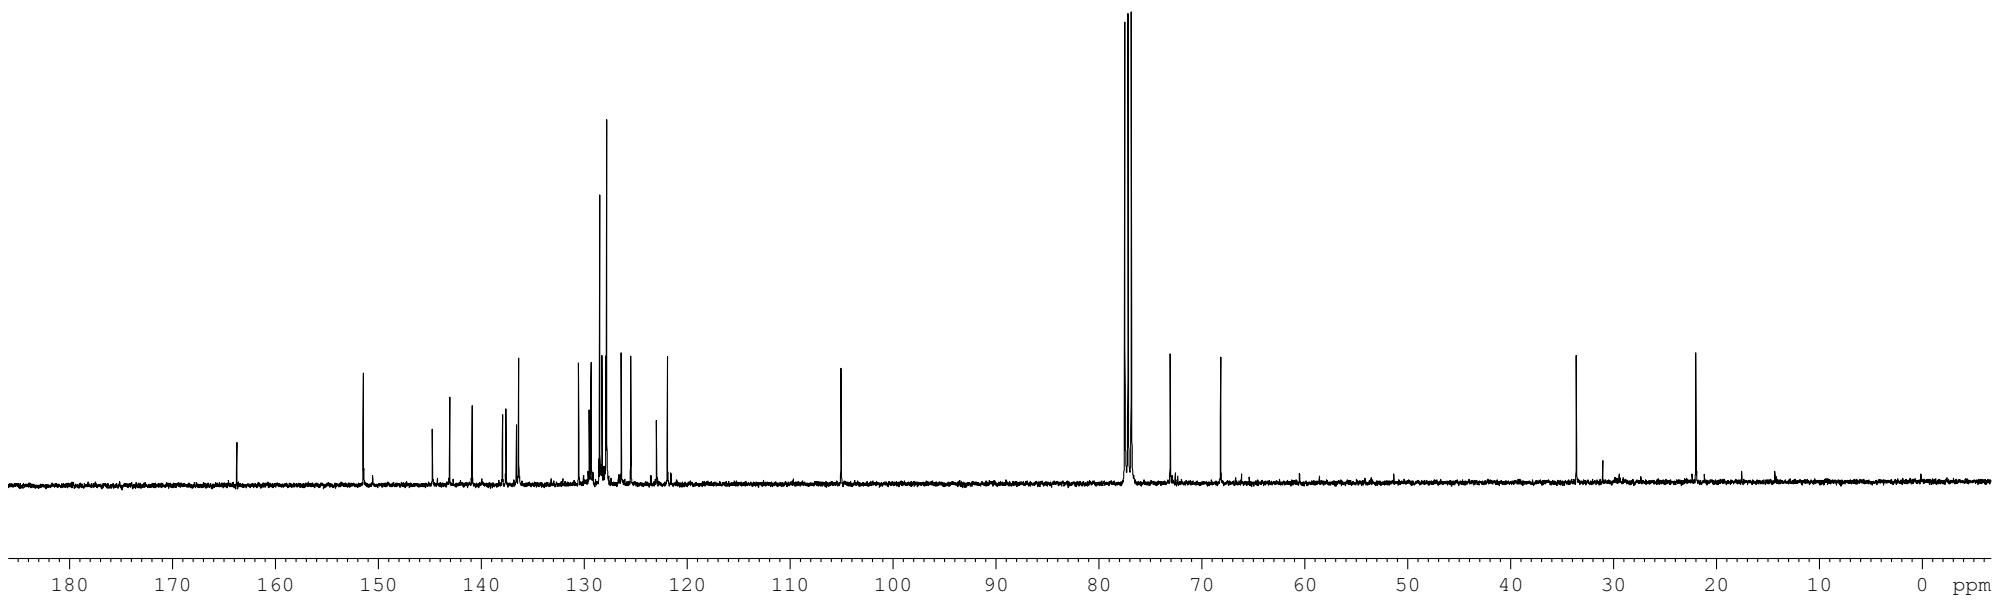

— 163.7708

— 151.4769  
— 144.7713  
— 143.0807  
— 140.8942  
— 137.9547  
— 137.6125  
— 136.5929  
— 136.3807  
— 130.5525  
— 129.5191  
— 129.3454  
— 128.5064  
— 128.2800  
— 127.9043  
— 127.8299  
— 126.4128  
— 125.4868  
— 122.9996  
— 121.9200

— 105.0542

— 77.4829  
— 77.1655  
— 76.8473  
— 73.0672  
— 68.1689

— 33.6089

— 21.9955

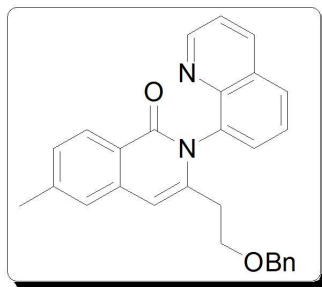

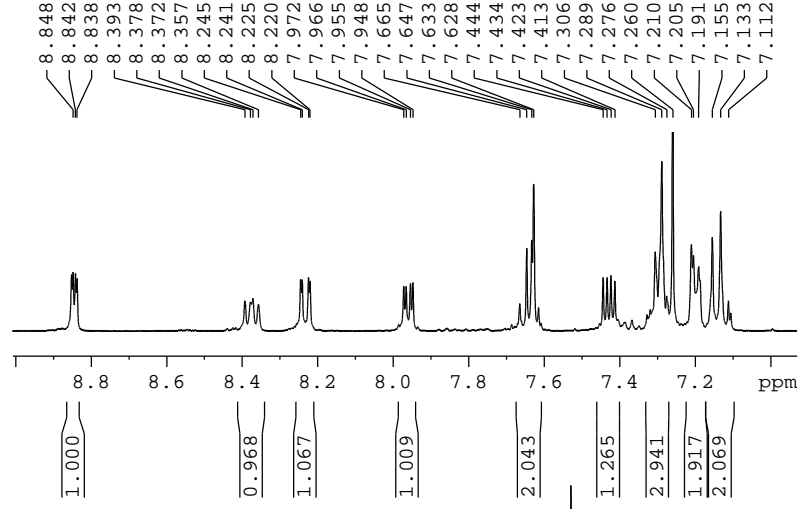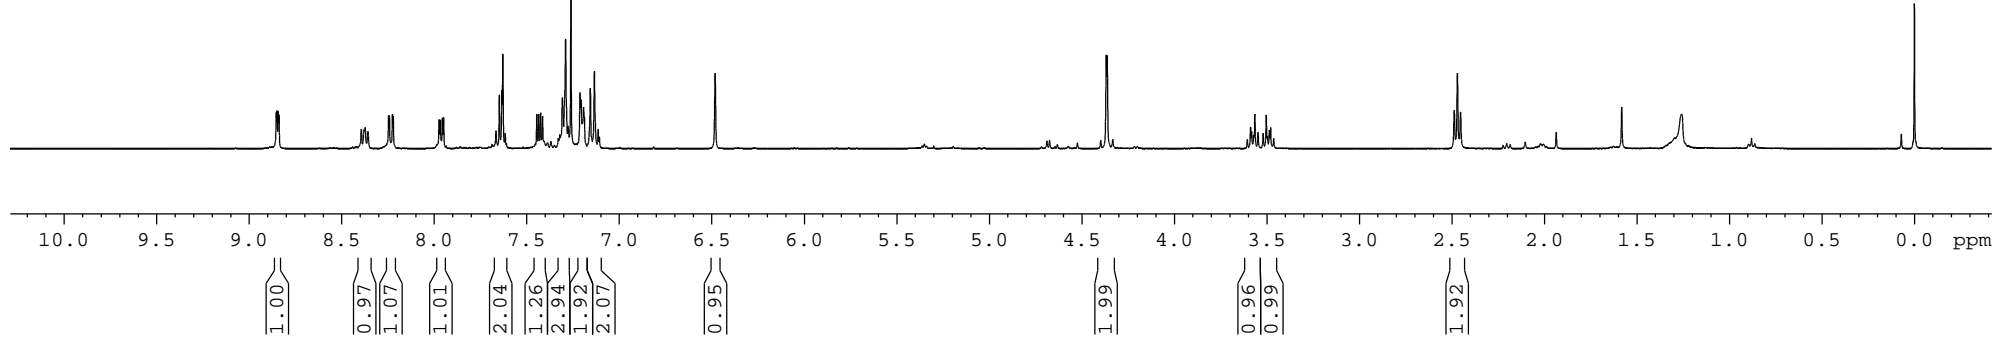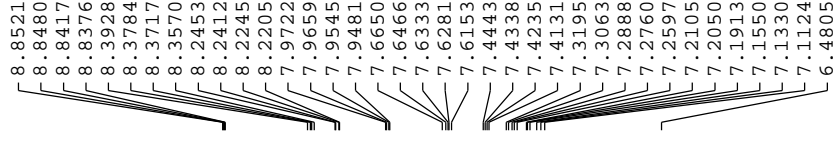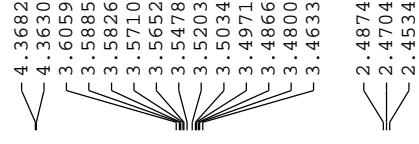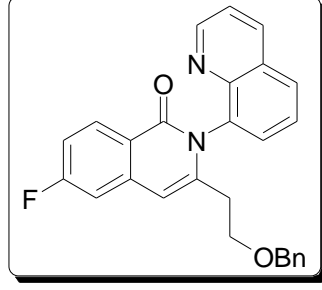

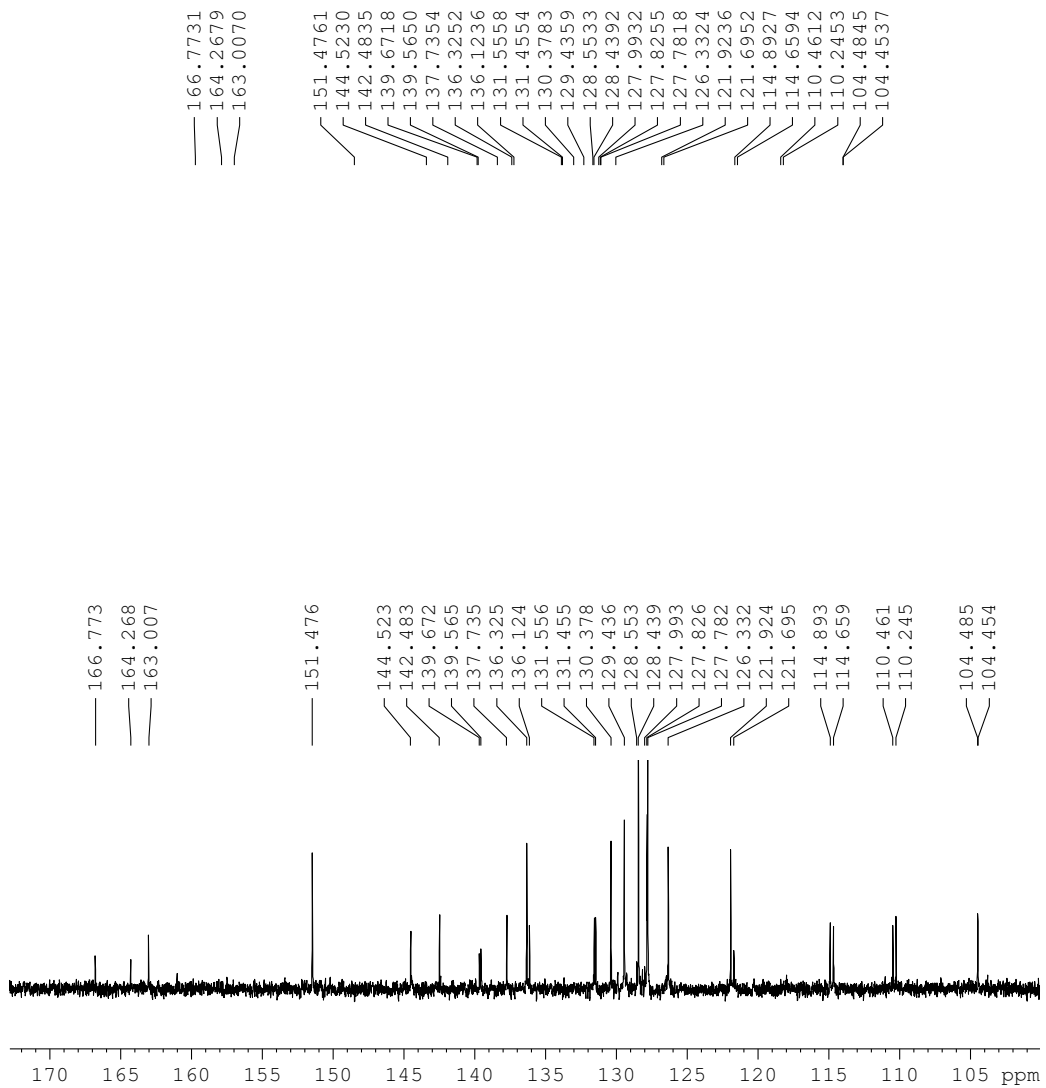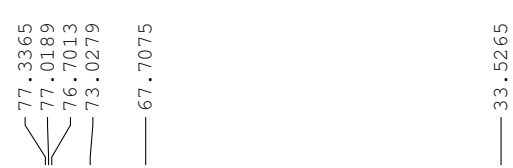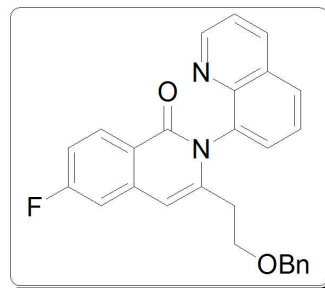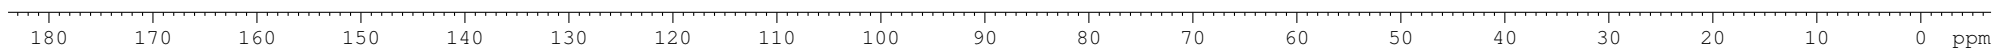

8.6752  
8.6687  
8.1738  
8.1527  
8.0845  
8.0650  
7.7936  
7.7741  
7.7539  
7.6389  
7.6202  
7.5900  
7.5683  
7.5408  
7.5211  
7.5017  
7.2586  
7.0996

4.1082  
4.0885  
4.0684  
4.0485

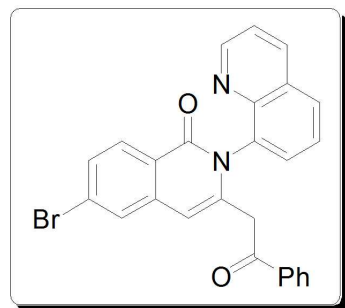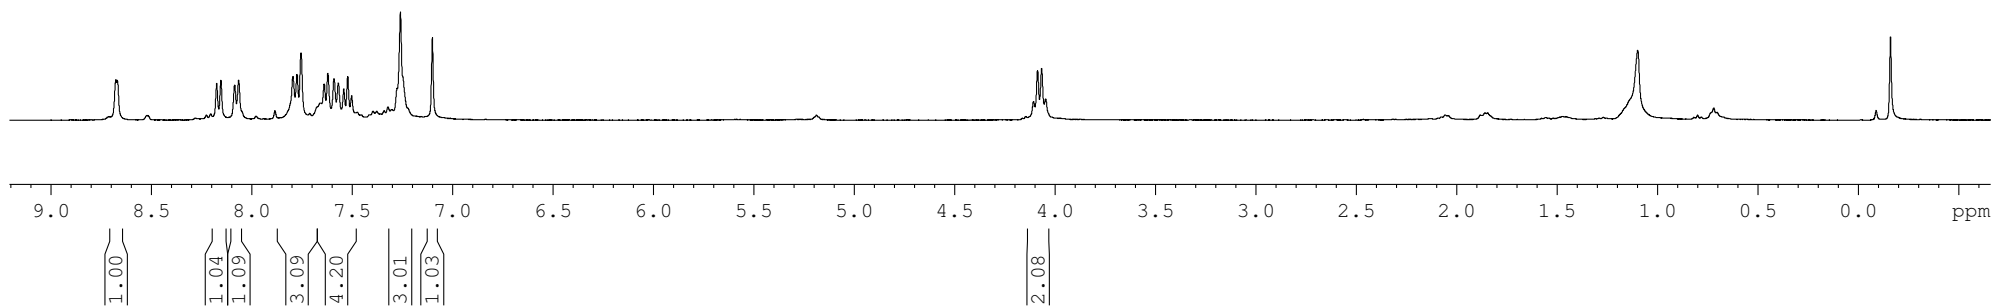

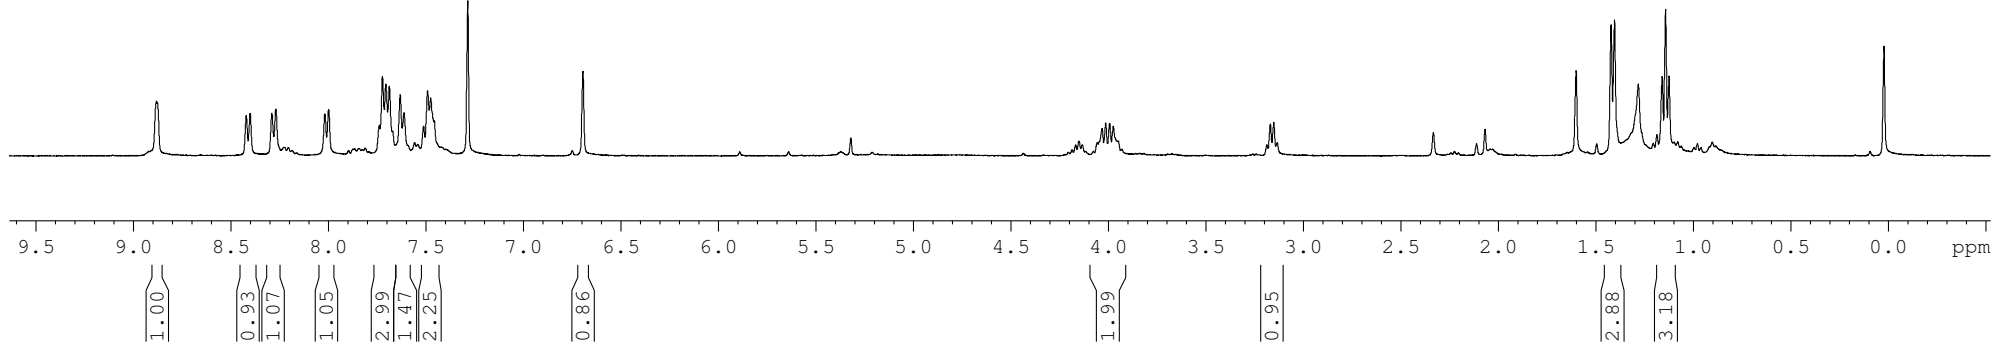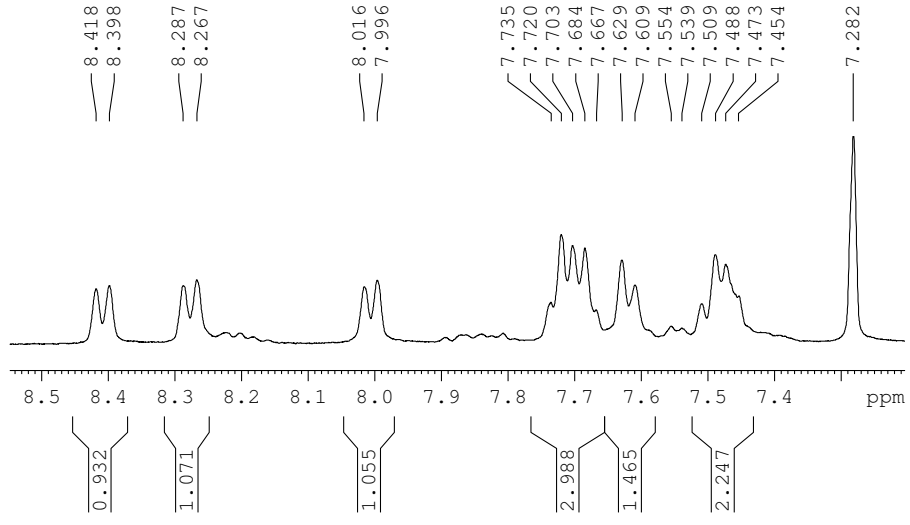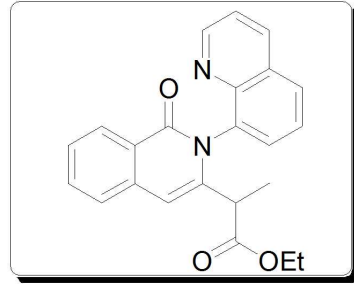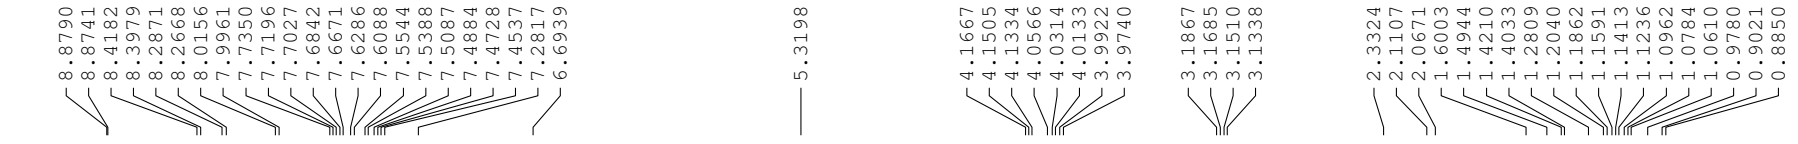



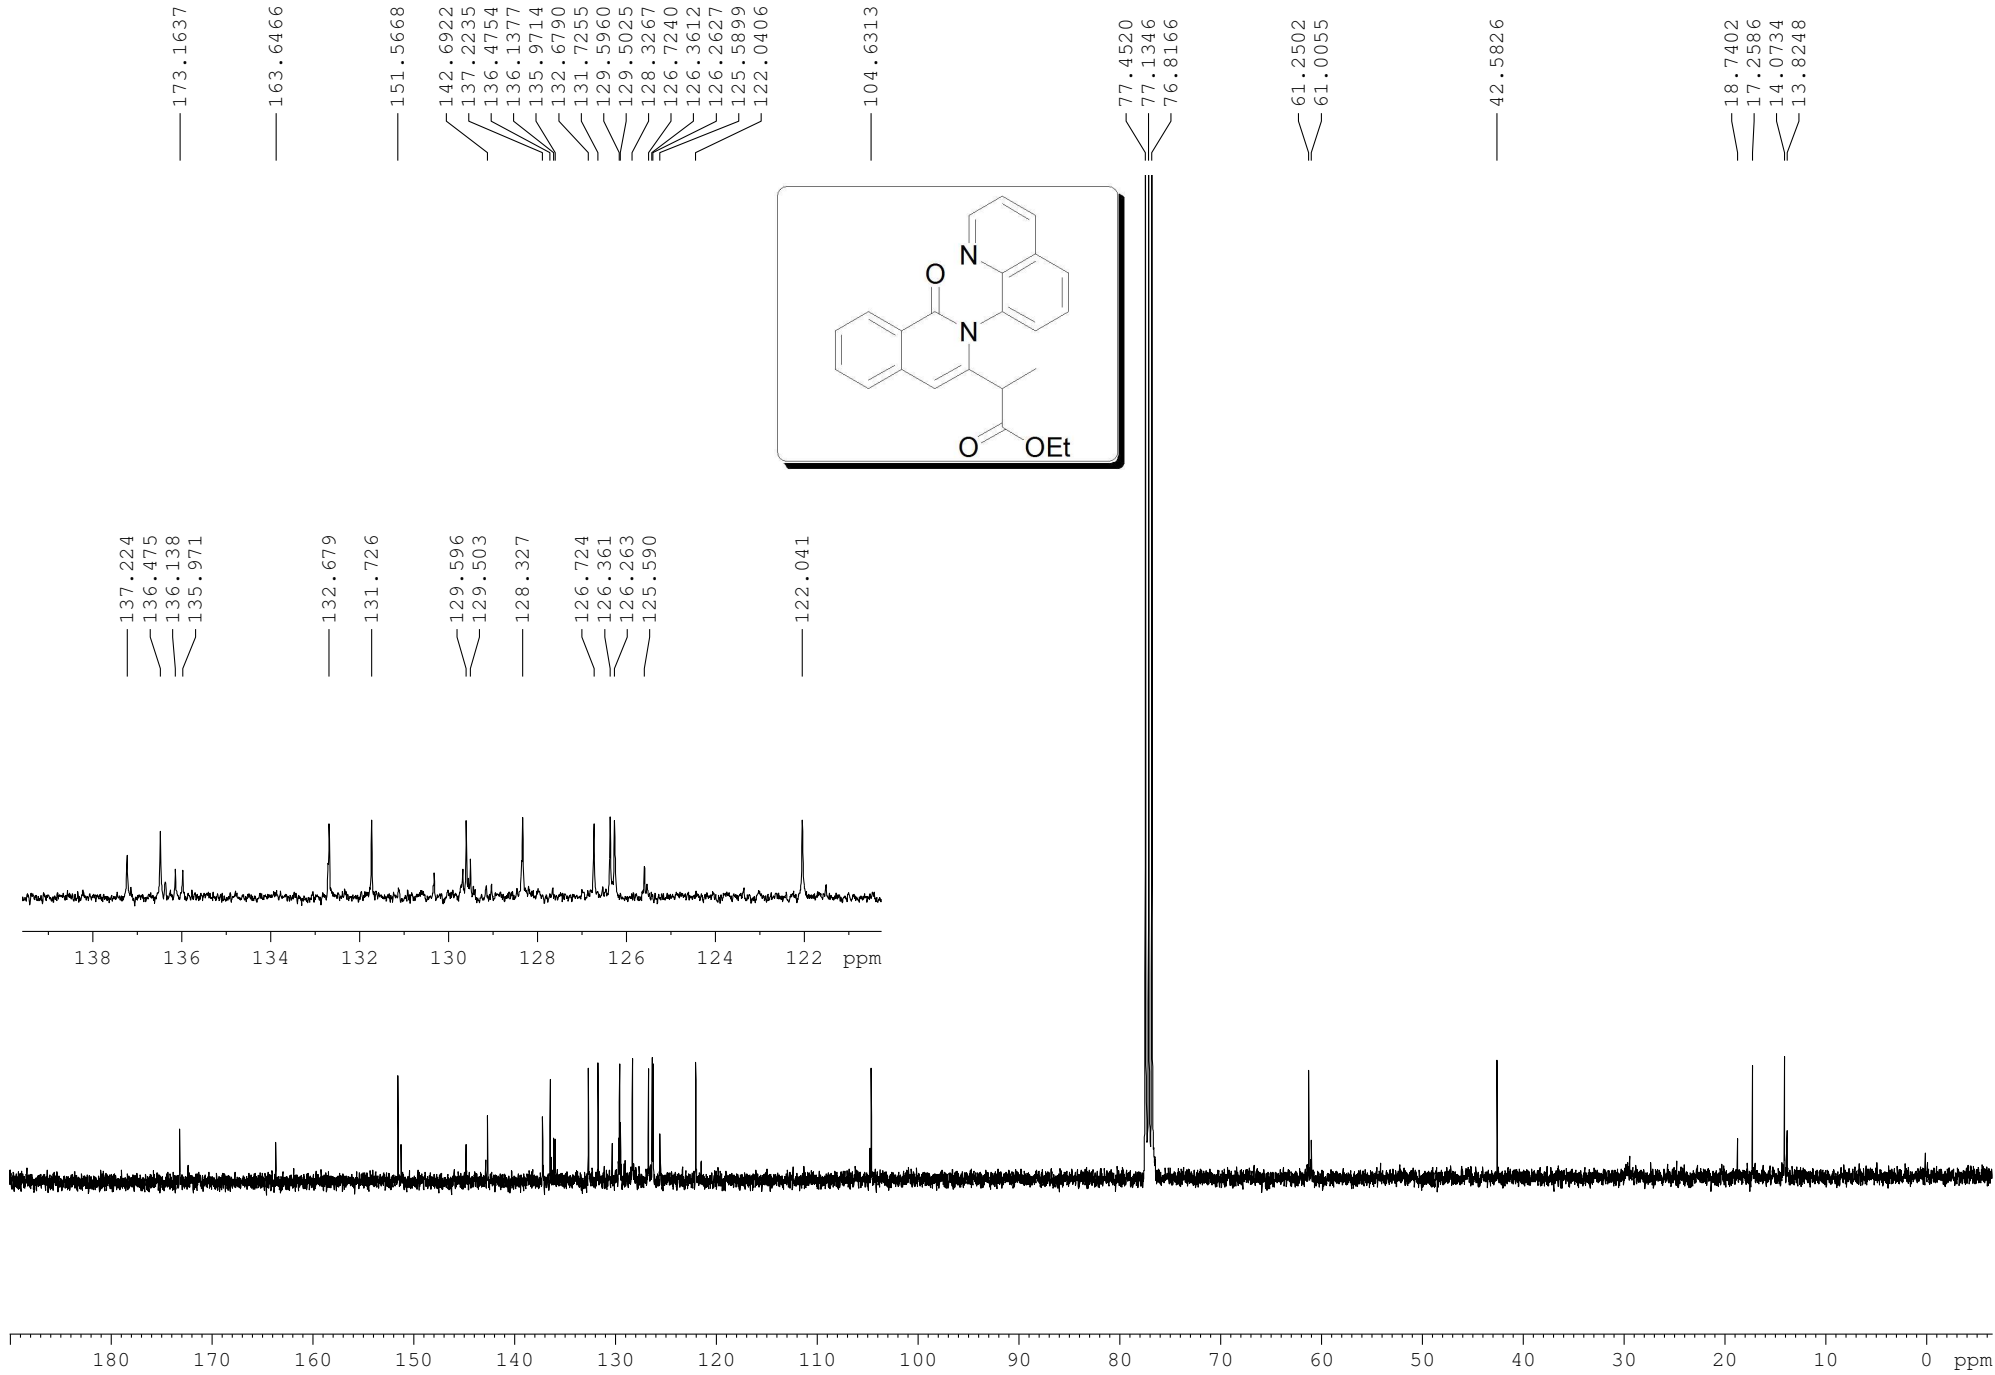

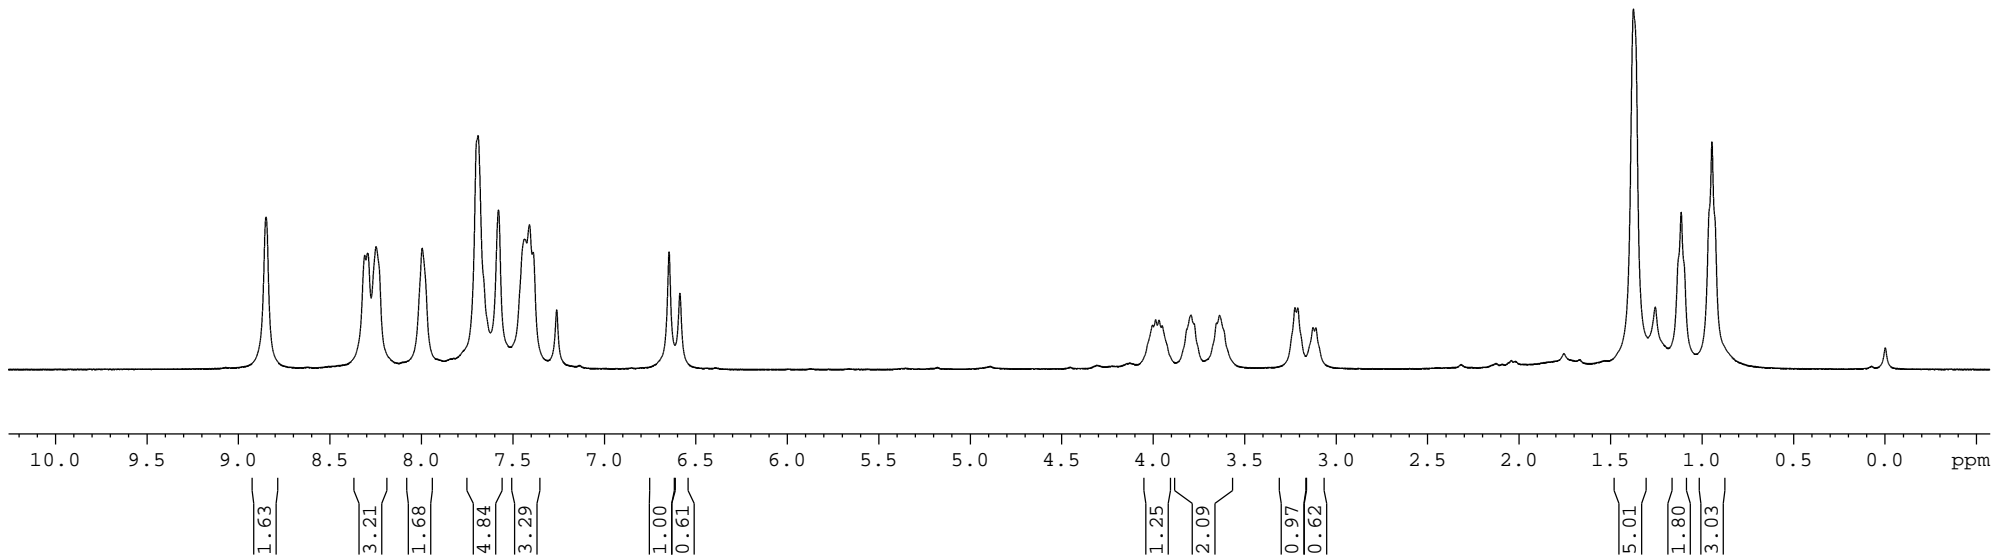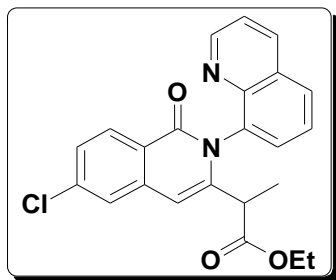

— 8.8483

8.3088

8.2921

8.2467

— 7.9945

7.6893

7.5778

7.4354

7.4081

7.3877

7.2594

— 6.6450

— 6.5856

4.0047

3.9877

3.9687

3.9515

3.7943

3.6385

3.2256

3.2102

3.1270

3.1119

— 1.3756

— 1.2560

— 1.1146

— 0.9463

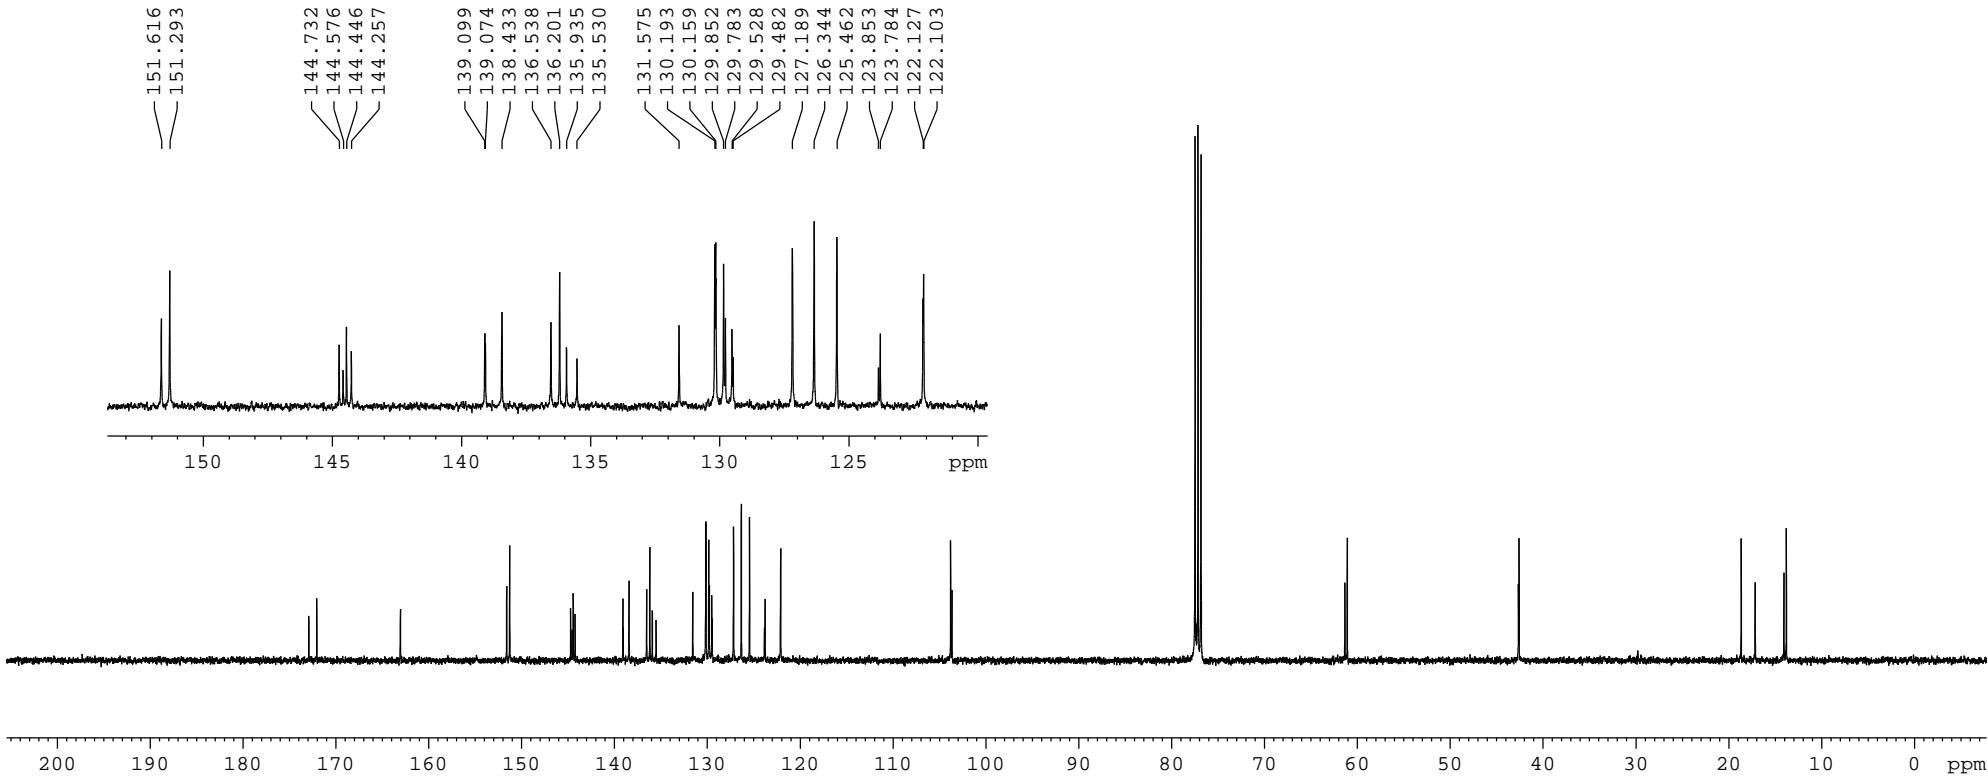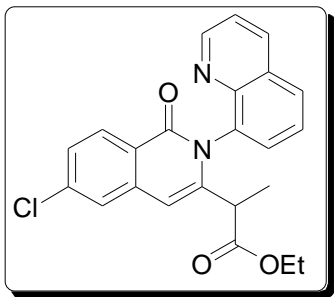

172.89  
172.04  
163.03  
151.62  
151.29  
144.73  
144.58  
144.45  
144.26  
139.10  
139.07  
138.43  
136.54  
136.20  
135.94  
135.53  
131.58  
130.19  
130.16  
129.85  
129.78  
129.53  
129.48  
127.19  
126.34  
125.46  
123.85  
123.78  
122.13  
122.10  
103.81  
103.65

77.48  
77.16  
76.84

61.35  
61.09

42.65  
42.58

18.66  
17.16  
14.05  
13.80

8.8428  
8.8393  
8.4697  
8.4490  
8.2853  
8.2823  
8.2646  
8.2615  
8.0239  
8.0147  
8.0090  
7.9998  
7.9364  
7.6857  
7.6768  
7.6707  
7.6624  
7.6595  
7.6416  
7.6388  
7.4893  
7.4789  
7.4686  
7.4582  
7.2576  
6.6673

4.0409  
4.0317  
4.0231  
4.0140  
4.0053  
3.9960  
3.9734  
3.9640  
3.9555  
3.9464  
3.9377  
3.9285  
3.1634  
3.1456  
3.1277  
3.1098

1.4081  
1.3901  
1.1349  
1.1171  
1.0993

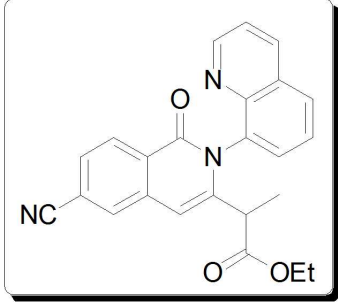

8.85  
8.84  
8.84

8.47  
8.45

8.29  
8.28  
8.26  
8.26

8.02  
8.01  
8.01  
8.00  
7.94

7.69  
7.68  
7.67  
7.66  
7.66  
7.64  
7.64  
7.49  
7.48  
7.47  
7.46

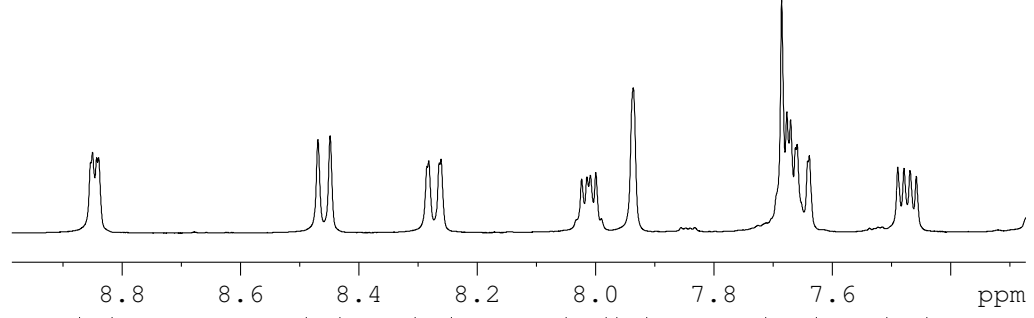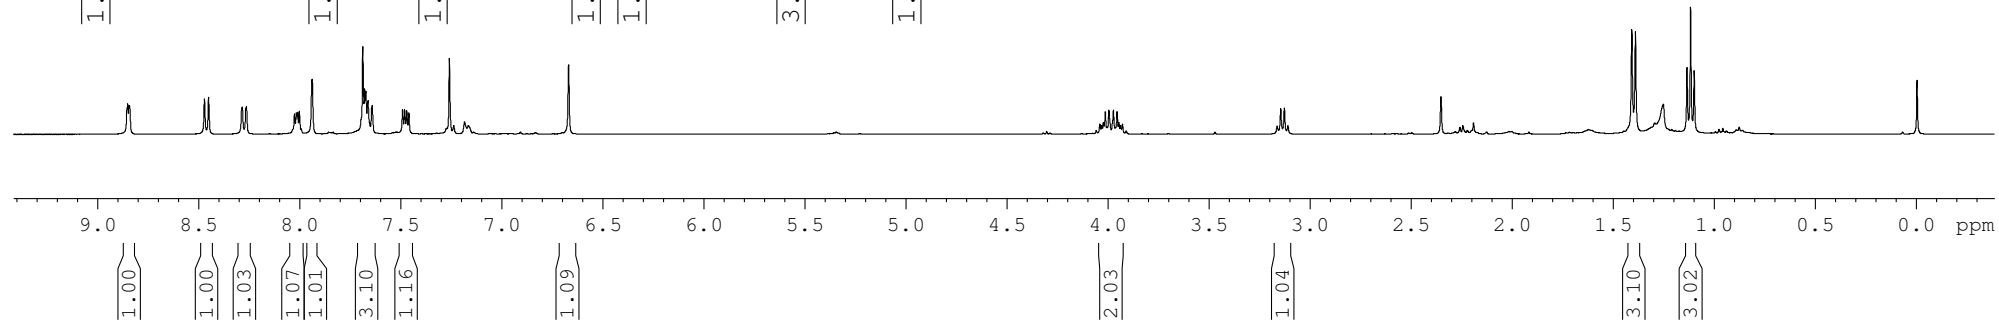

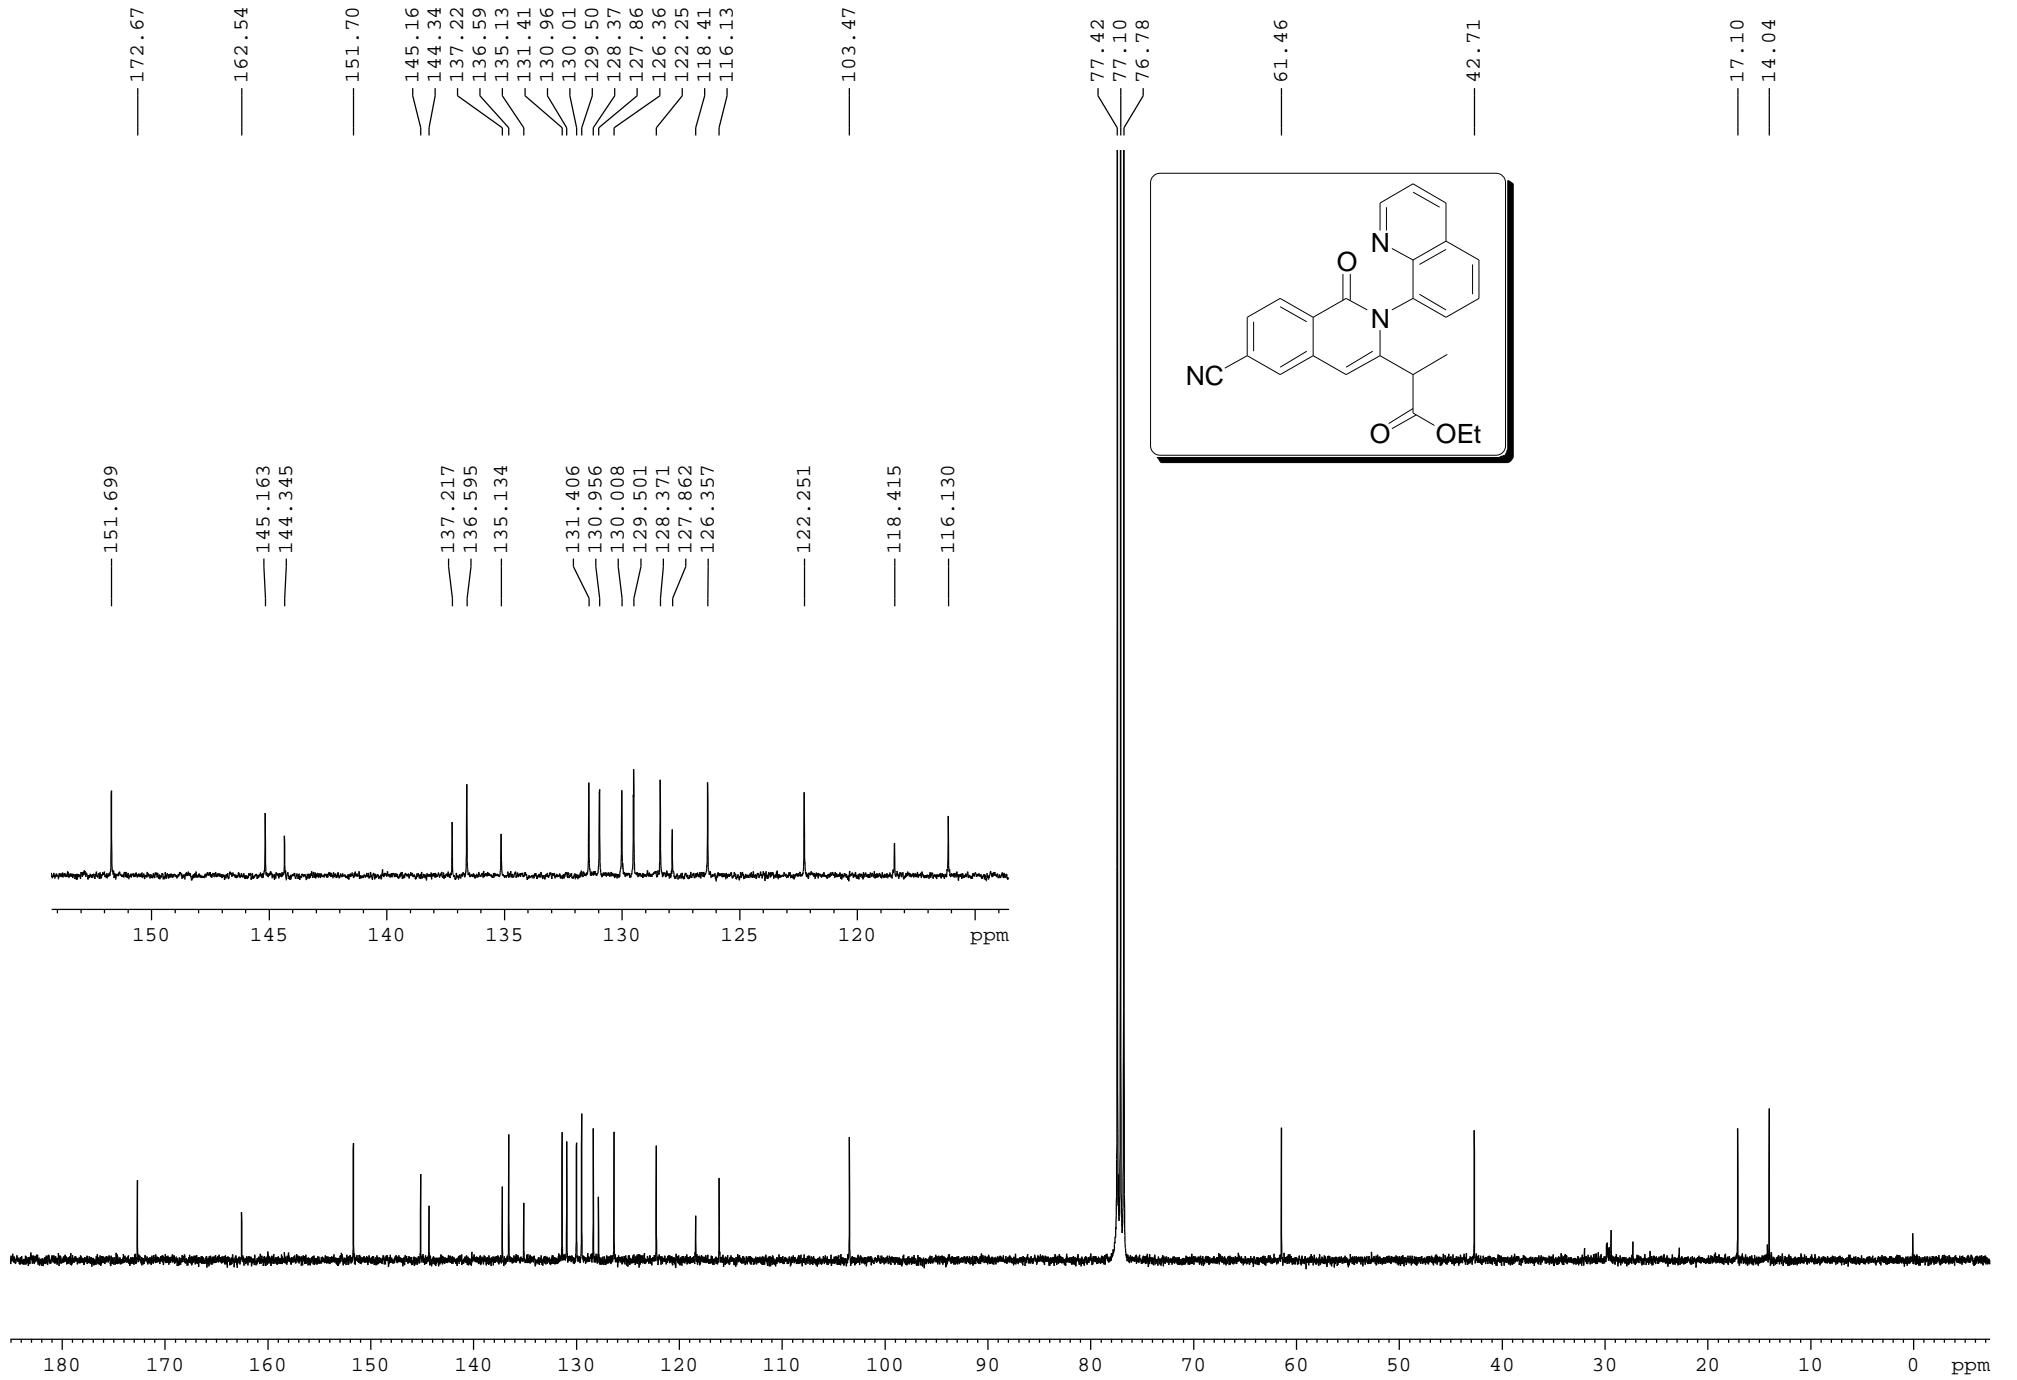

8.8470  
8.8397  
8.8369  
8.4611  
8.4405  
8.2706  
8.2499  
8.0396  
8.0333  
8.0222  
8.0158  
7.9271  
7.7199  
7.7075  
7.7020  
7.6537  
7.6330  
7.4724  
7.4620  
7.4516  
7.4411  
7.2578  
6.7367

8.46  
8.44

8.27  
8.25

8.04  
8.03  
8.02  
8.02  
7.93

7.72  
7.71  
7.70  
7.65  
7.63

7.47  
7.46  
7.45  
7.44

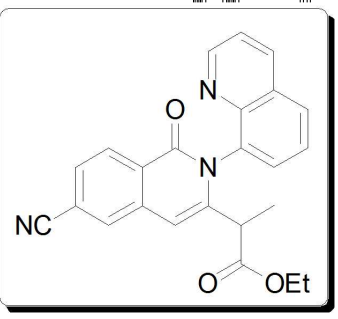

3.8225  
3.8135  
3.8047  
3.7956  
3.7872  
3.7777  
3.7600  
3.6713  
3.6535  
3.6445  
3.6357  
3.6266  
3.6181  
3.6088  
3.5909  
3.2756  
3.2580  
3.2403  
3.2227

1.3979  
1.3802

0.9635  
0.9457  
0.9279

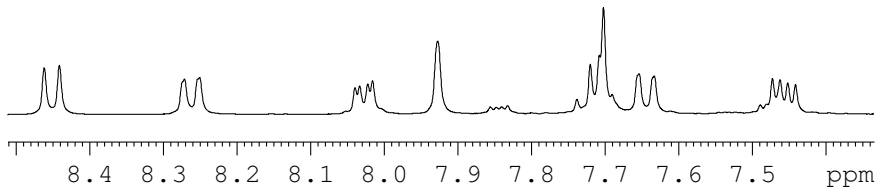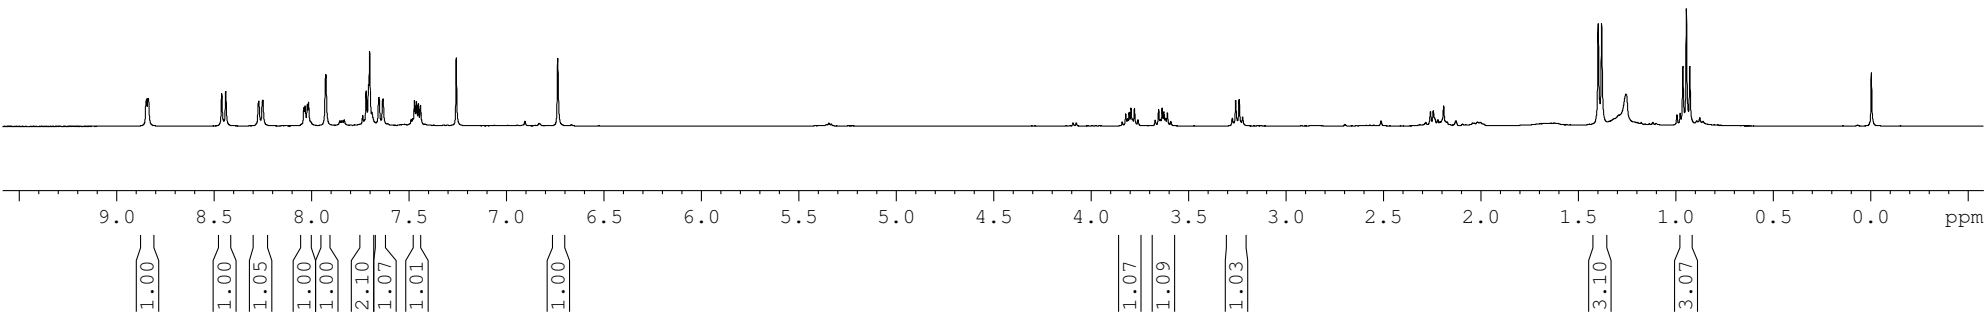

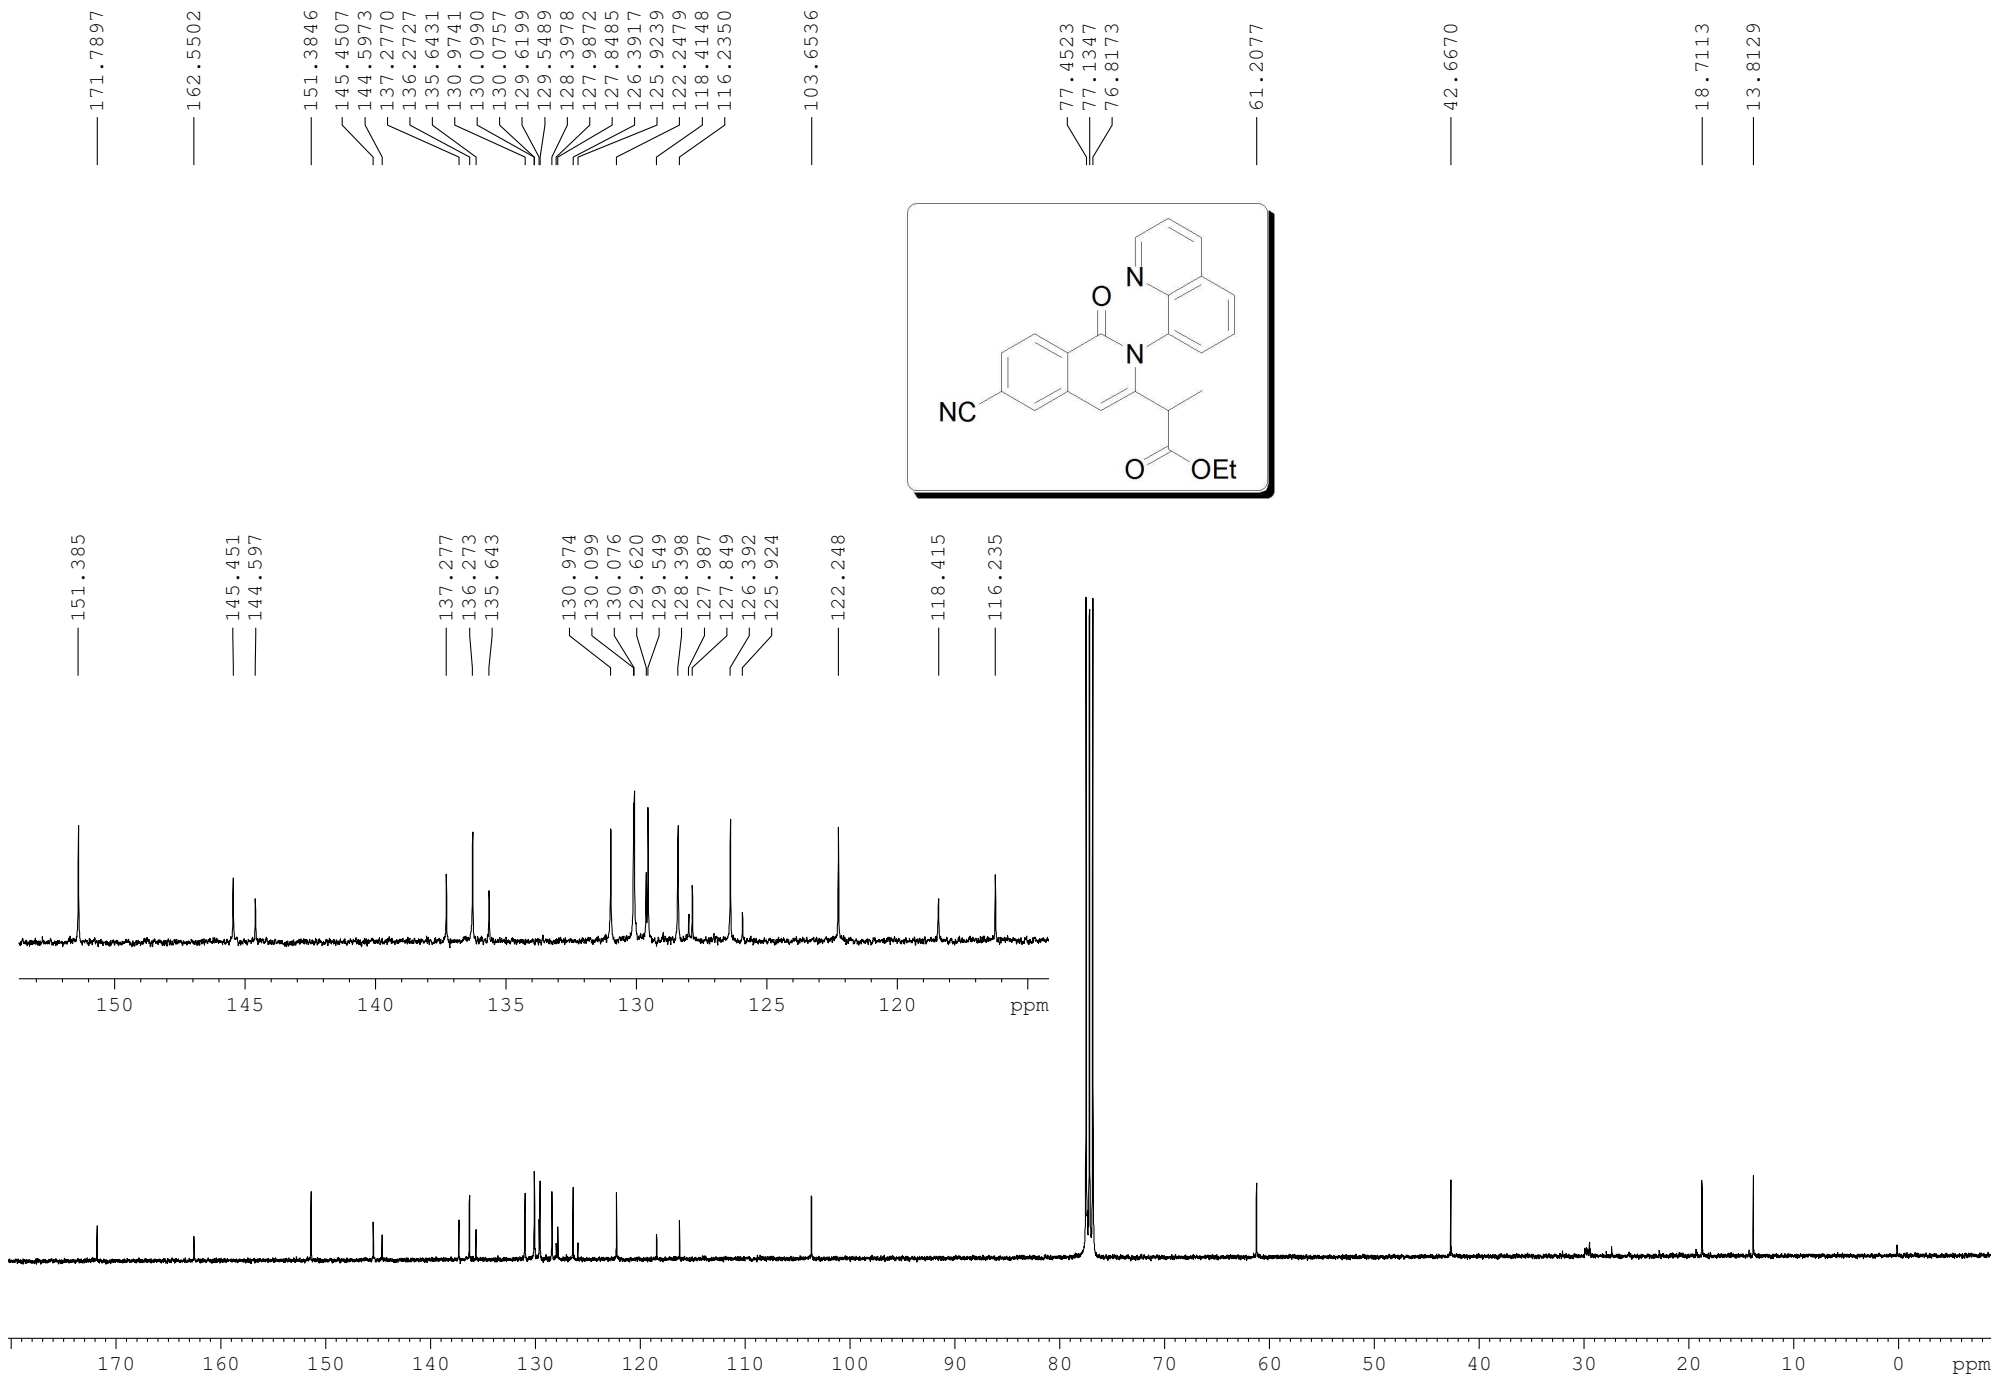

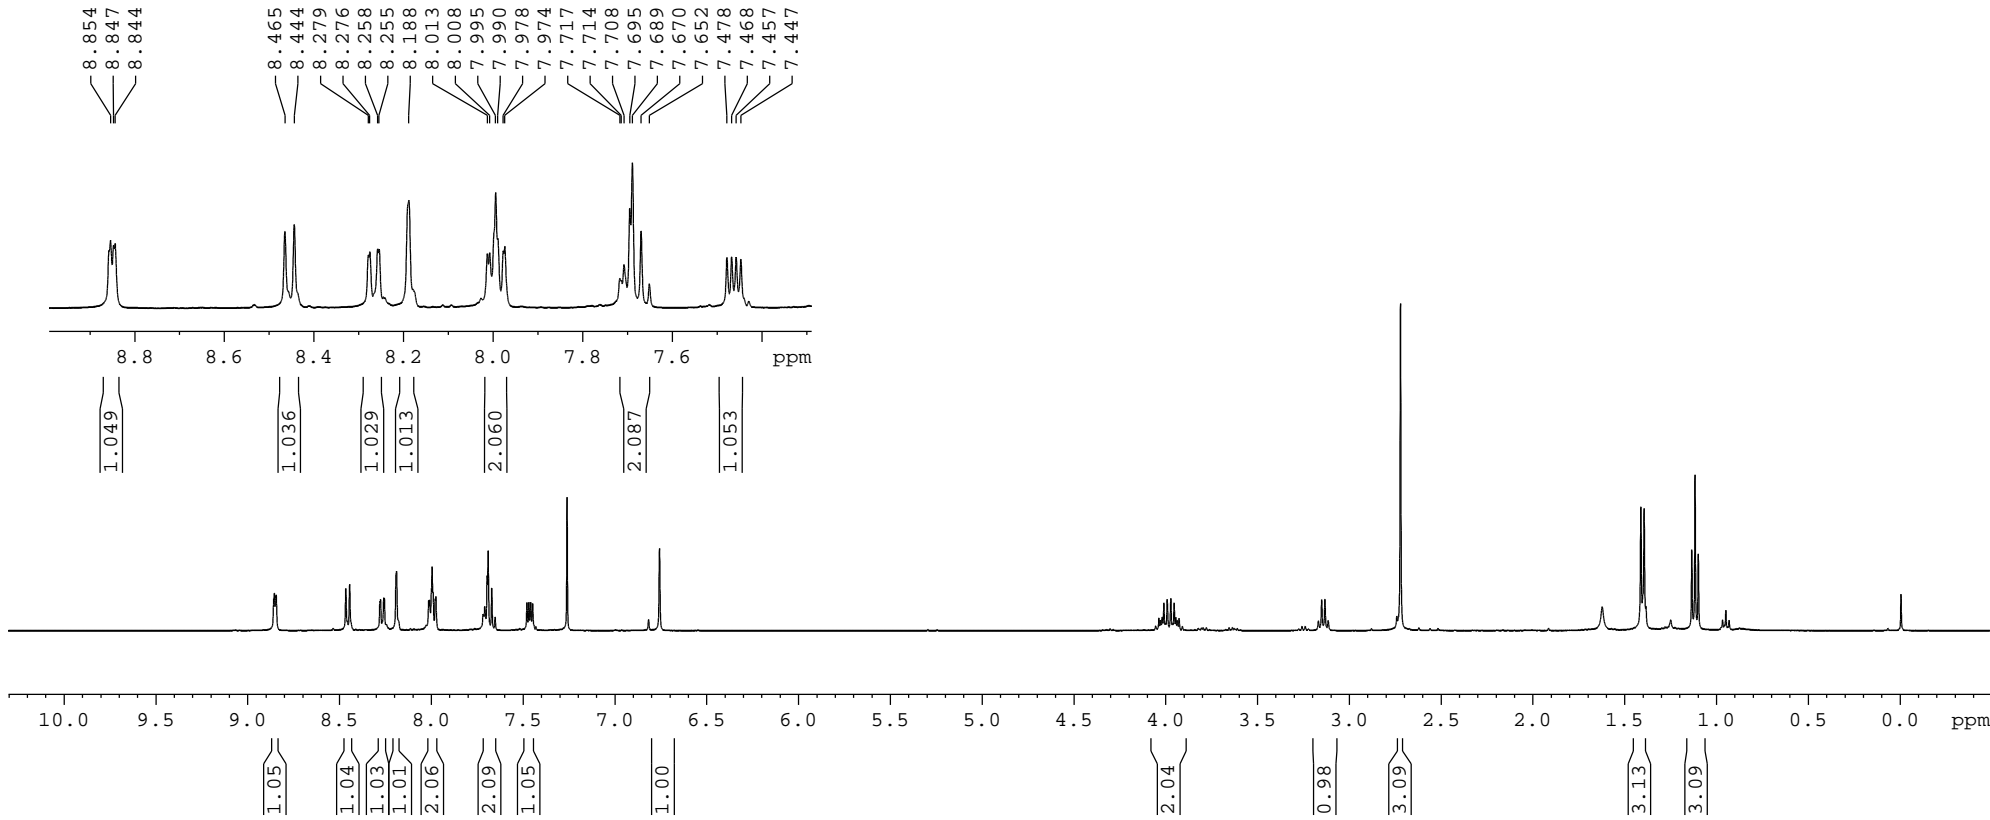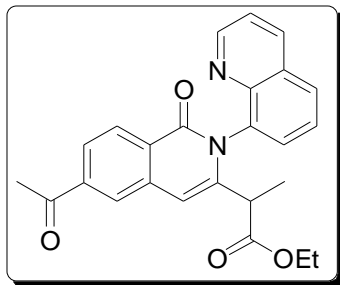

8.8541  
8.8473  
8.8437  
8.4647  
8.4438  
8.2790  
8.2756  
8.2583  
8.2548  
8.1885  
8.0132  
8.0080  
7.9947  
7.9897  
7.9778  
7.9742  
7.7173  
7.7143  
7.7080  
7.6952  
7.6893  
7.6699  
7.6515  
7.4782  
7.4677  
7.4575  
7.4470  
7.2597  
6.7560

4.0378  
4.0286  
4.0200  
4.0108  
4.0021  
3.9927  
3.9728  
3.9634  
3.9548  
3.9456  
3.9370  
3.9278  
3.1692  
3.1513  
3.1334  
3.1155  
2.7220

1.4128  
1.3949  
1.1355  
1.1176  
1.0998

— -0.0040



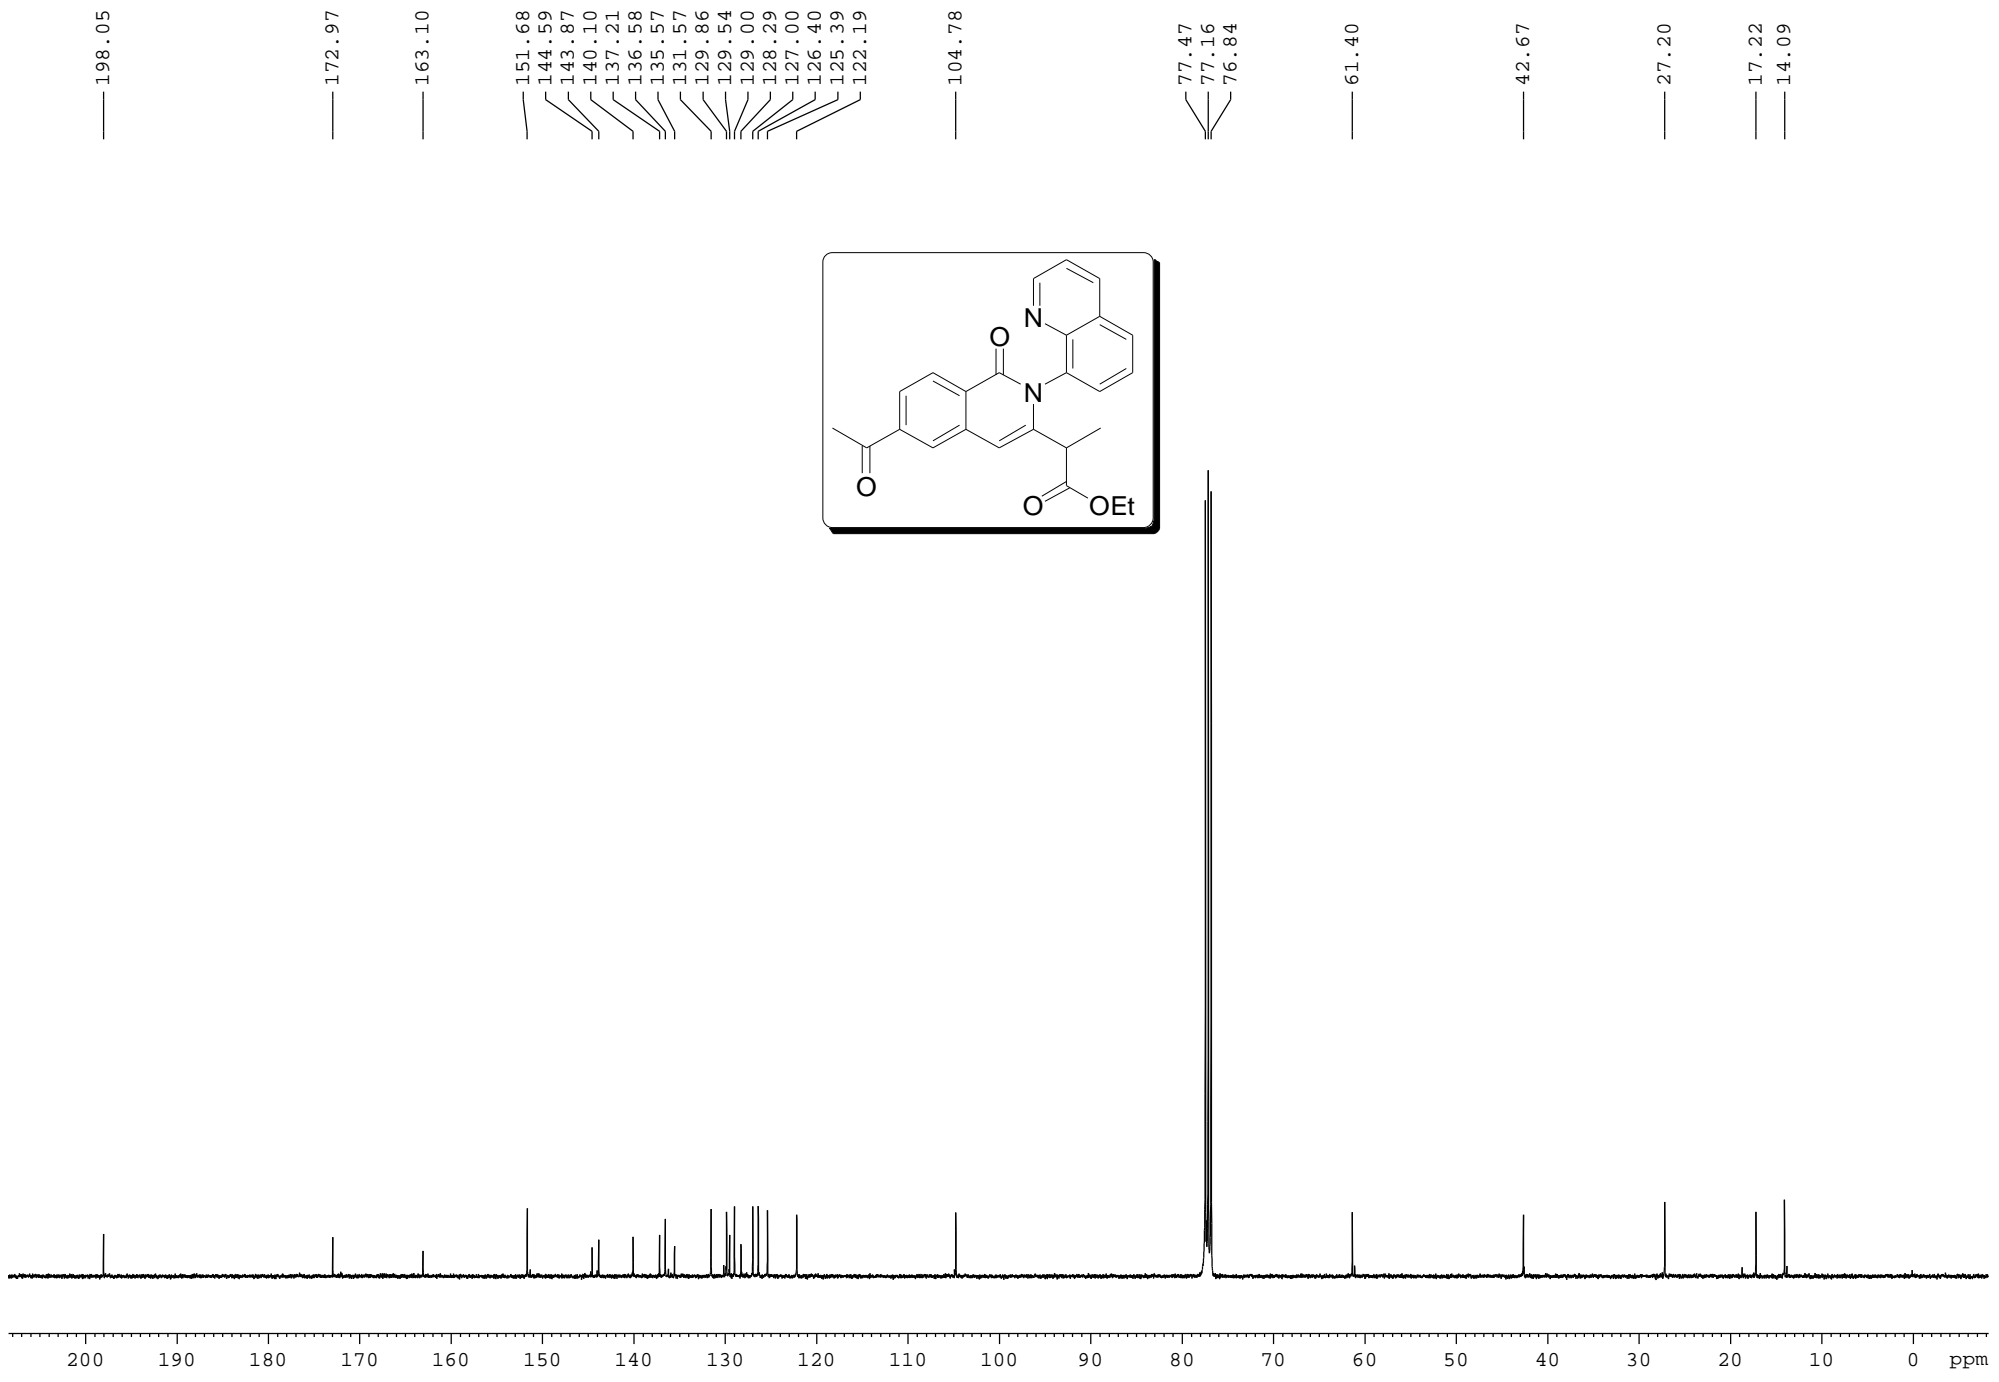

— 198.05

— 172.97

— 163.10

151.68  
144.59  
143.87  
140.10  
137.21  
136.58  
135.57  
131.57  
129.86  
129.54  
129.00  
128.29  
127.00  
126.40  
125.39  
122.19

— 104.78

77.47  
77.16  
76.84

— 61.40

— 42.67

— 27.20

— 17.22

— 14.09

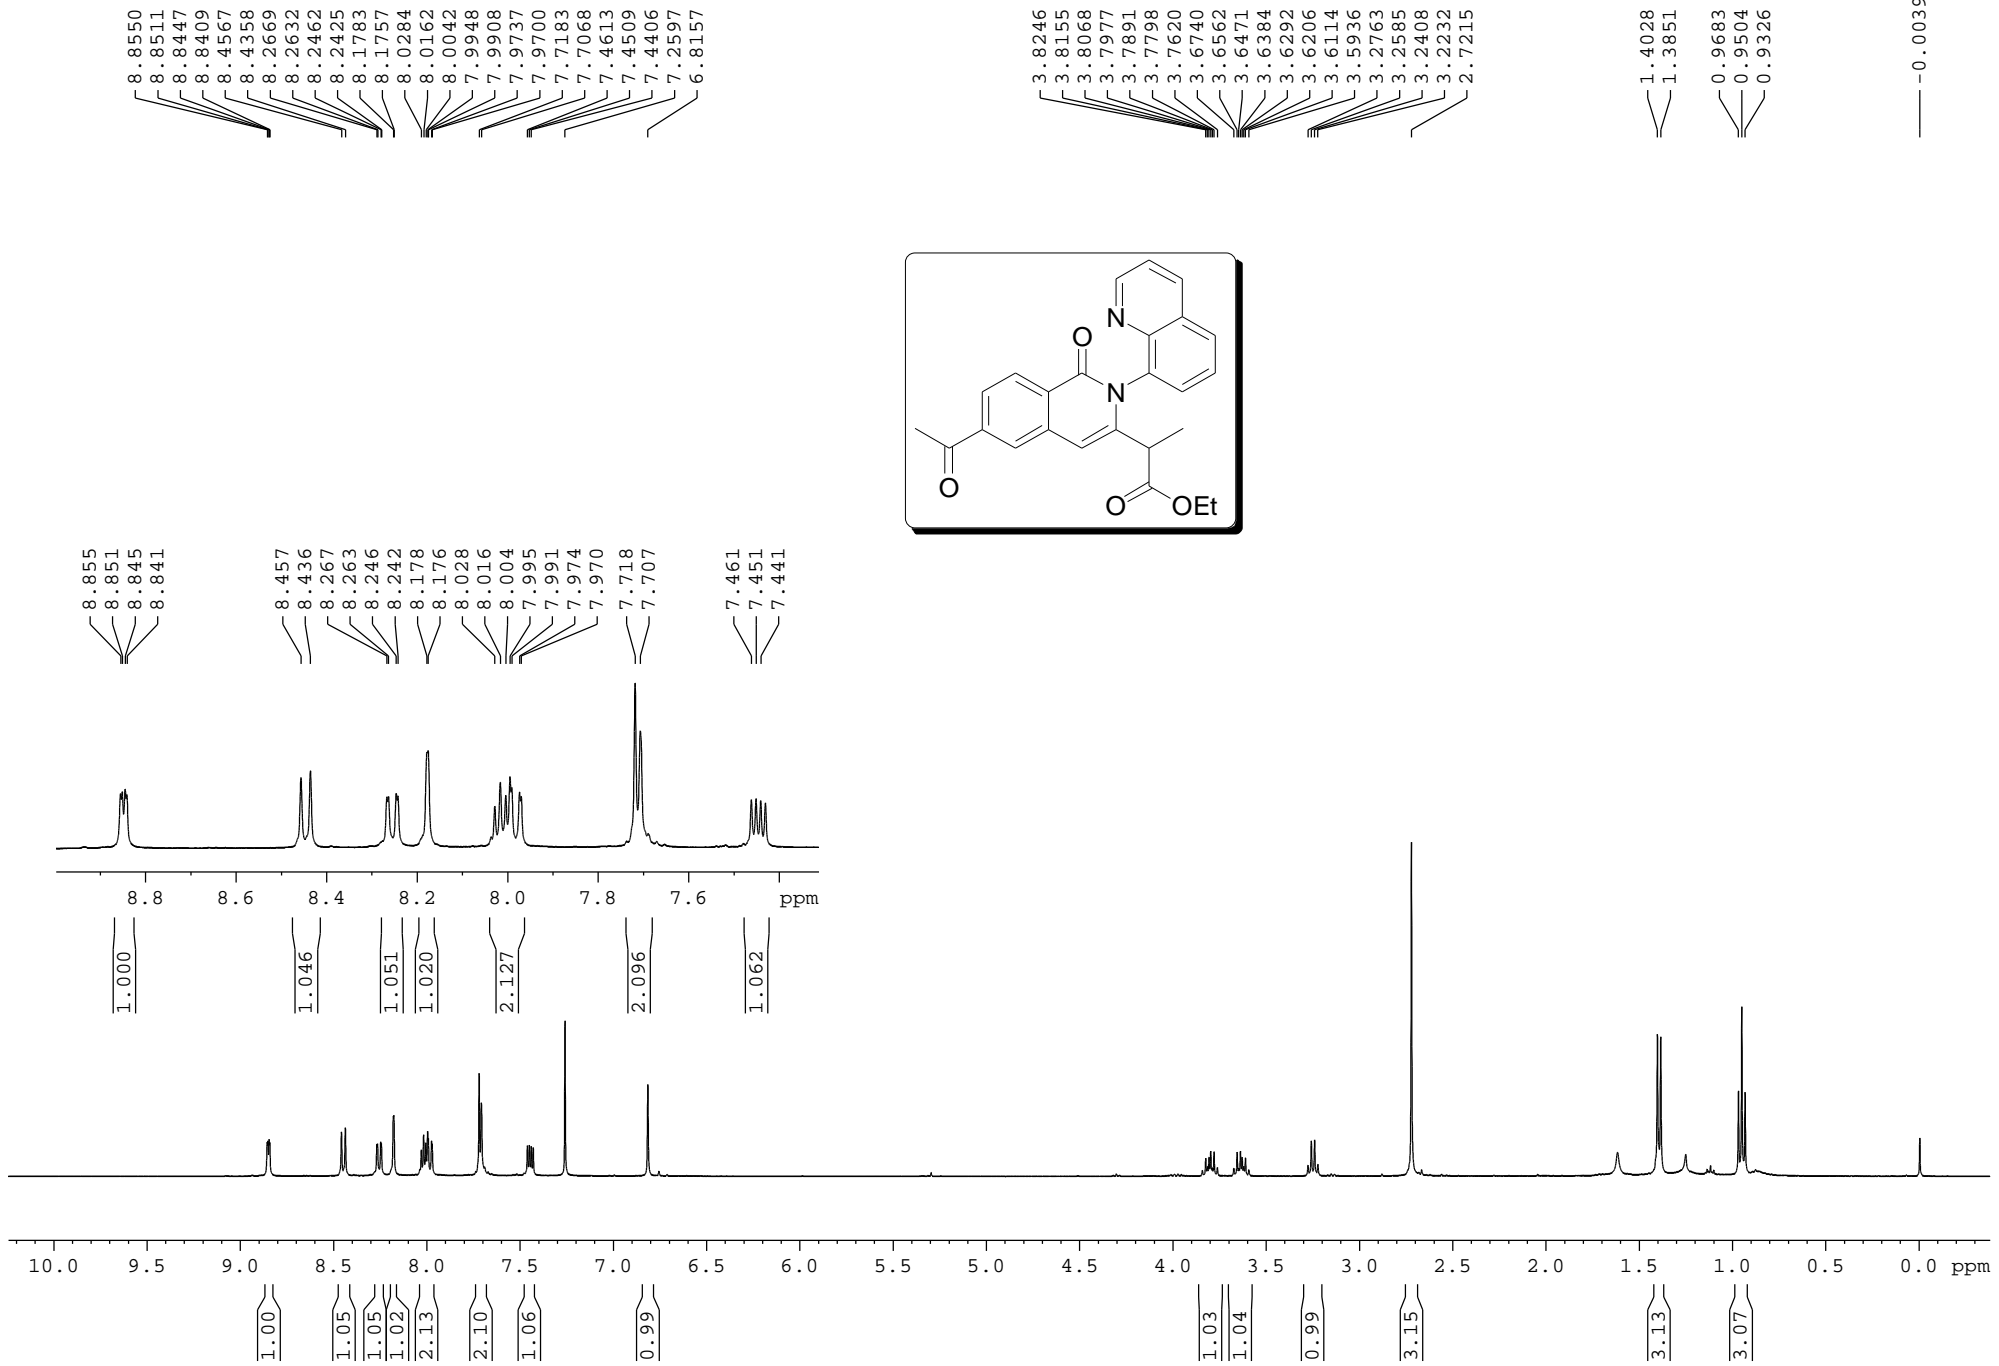

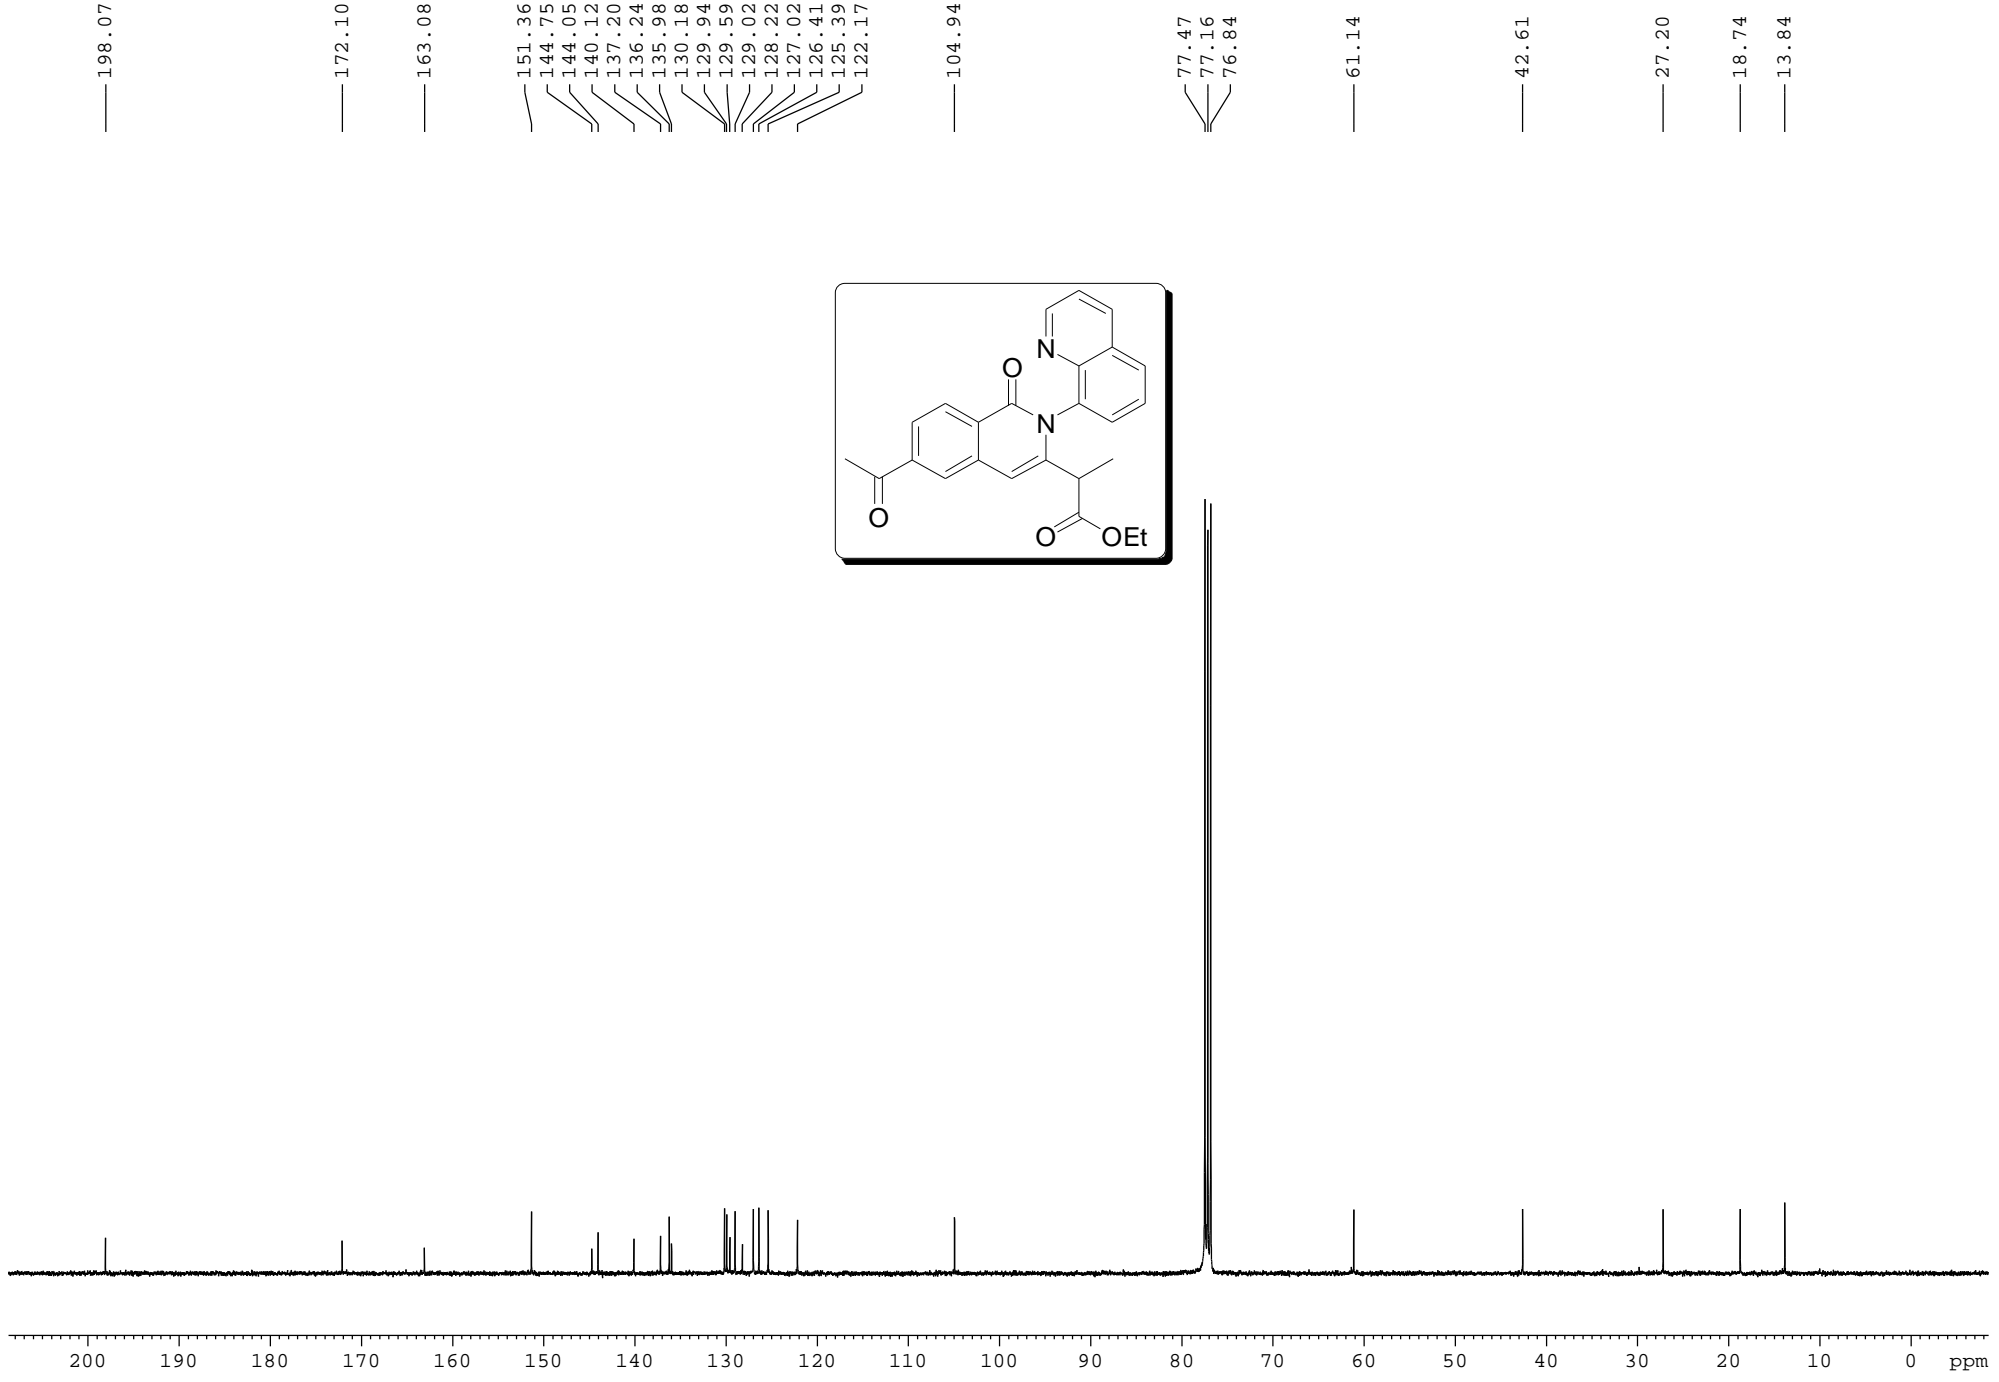

— 198.07

— 172.10

— 163.08

— 151.36

— 144.75

— 144.05

— 140.12

— 137.20

— 136.24

— 135.98

— 130.18

— 129.94

— 129.59

— 129.02

— 128.22

— 127.02

— 126.41

— 125.39

— 122.17

— 104.94

— 77.47

— 77.16

— 76.84

— 61.14

— 42.61

— 27.20

— 18.74

— 13.84

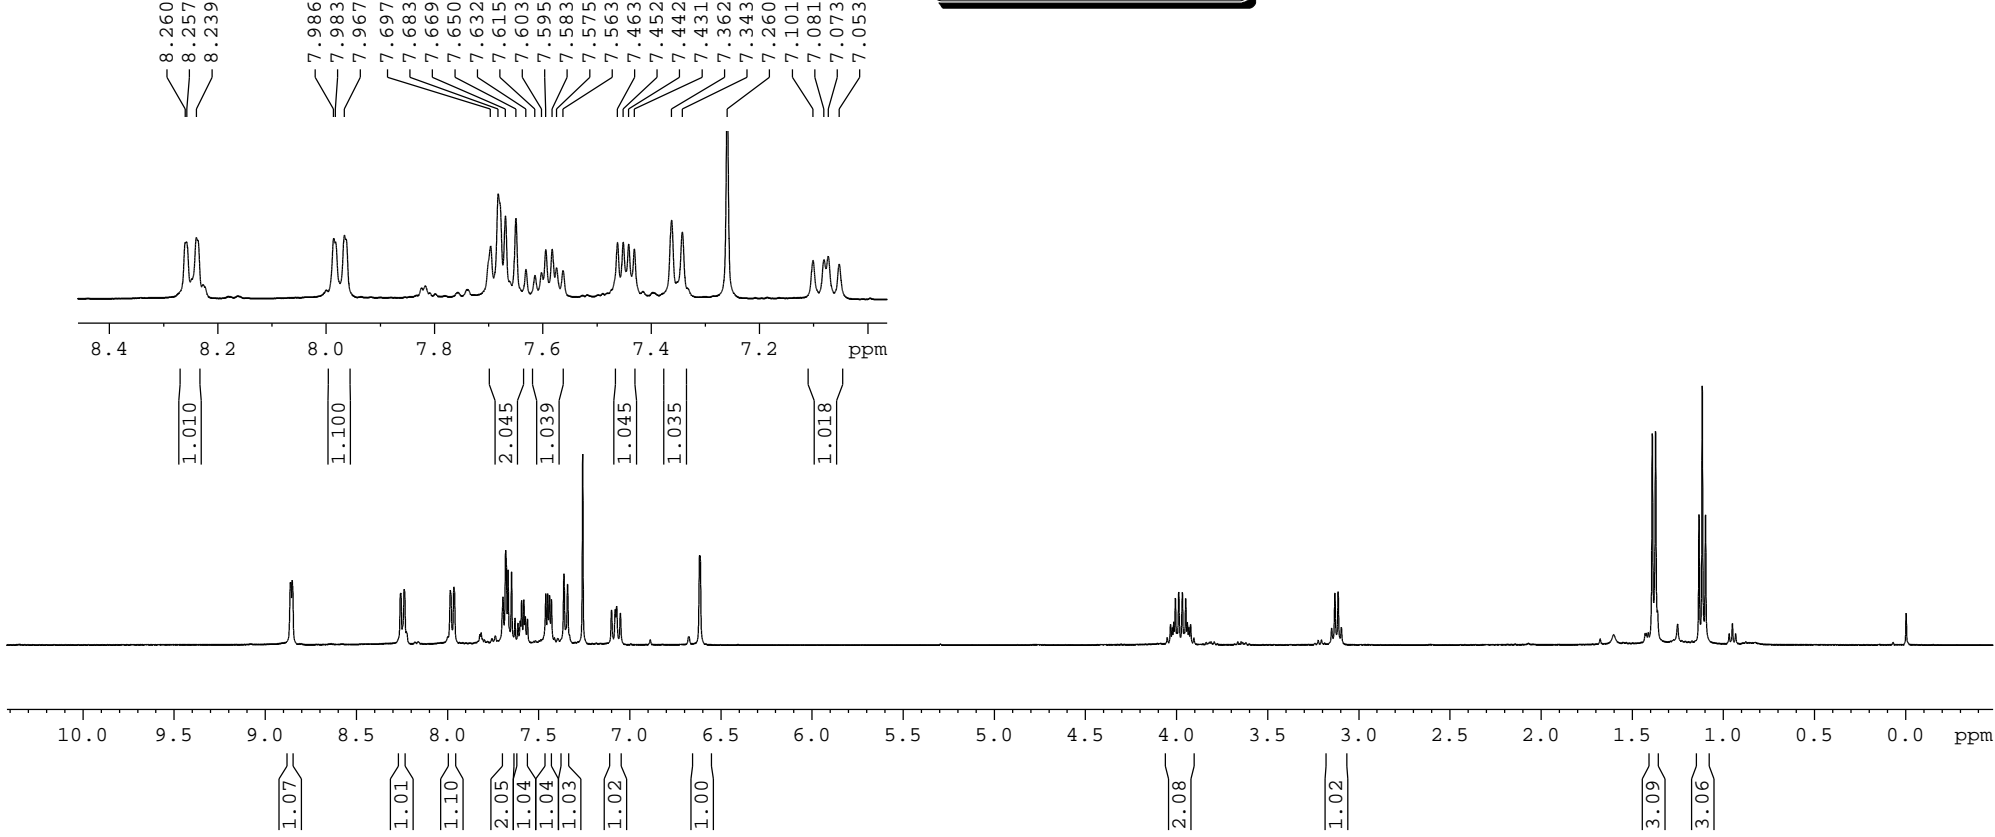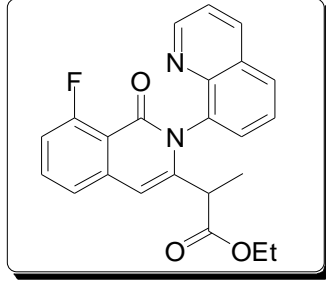

8.8641  
8.8610  
8.8540  
8.2599  
8.2574  
8.2395  
7.9864  
7.9831  
7.9668  
7.6968  
7.6826  
7.6694  
7.6500  
7.6315  
7.6149  
7.6028  
7.5949  
7.5829  
7.5749  
7.5630  
7.4625  
7.4519  
7.4418  
7.4313  
7.3625  
7.3427  
7.2598  
7.1014  
7.0811  
7.0733  
7.0530  
6.6185  
6.6151

4.0522  
4.0344  
4.0252  
4.0165  
4.0074  
3.9989  
3.9892  
3.9692  
3.9595  
3.9510  
3.9419  
3.9333  
3.9241  
3.9062  
3.1502  
3.1324  
3.1145  
3.0966

1.3906  
1.3727  
1.1343  
1.1165  
1.0987

— 0.0023

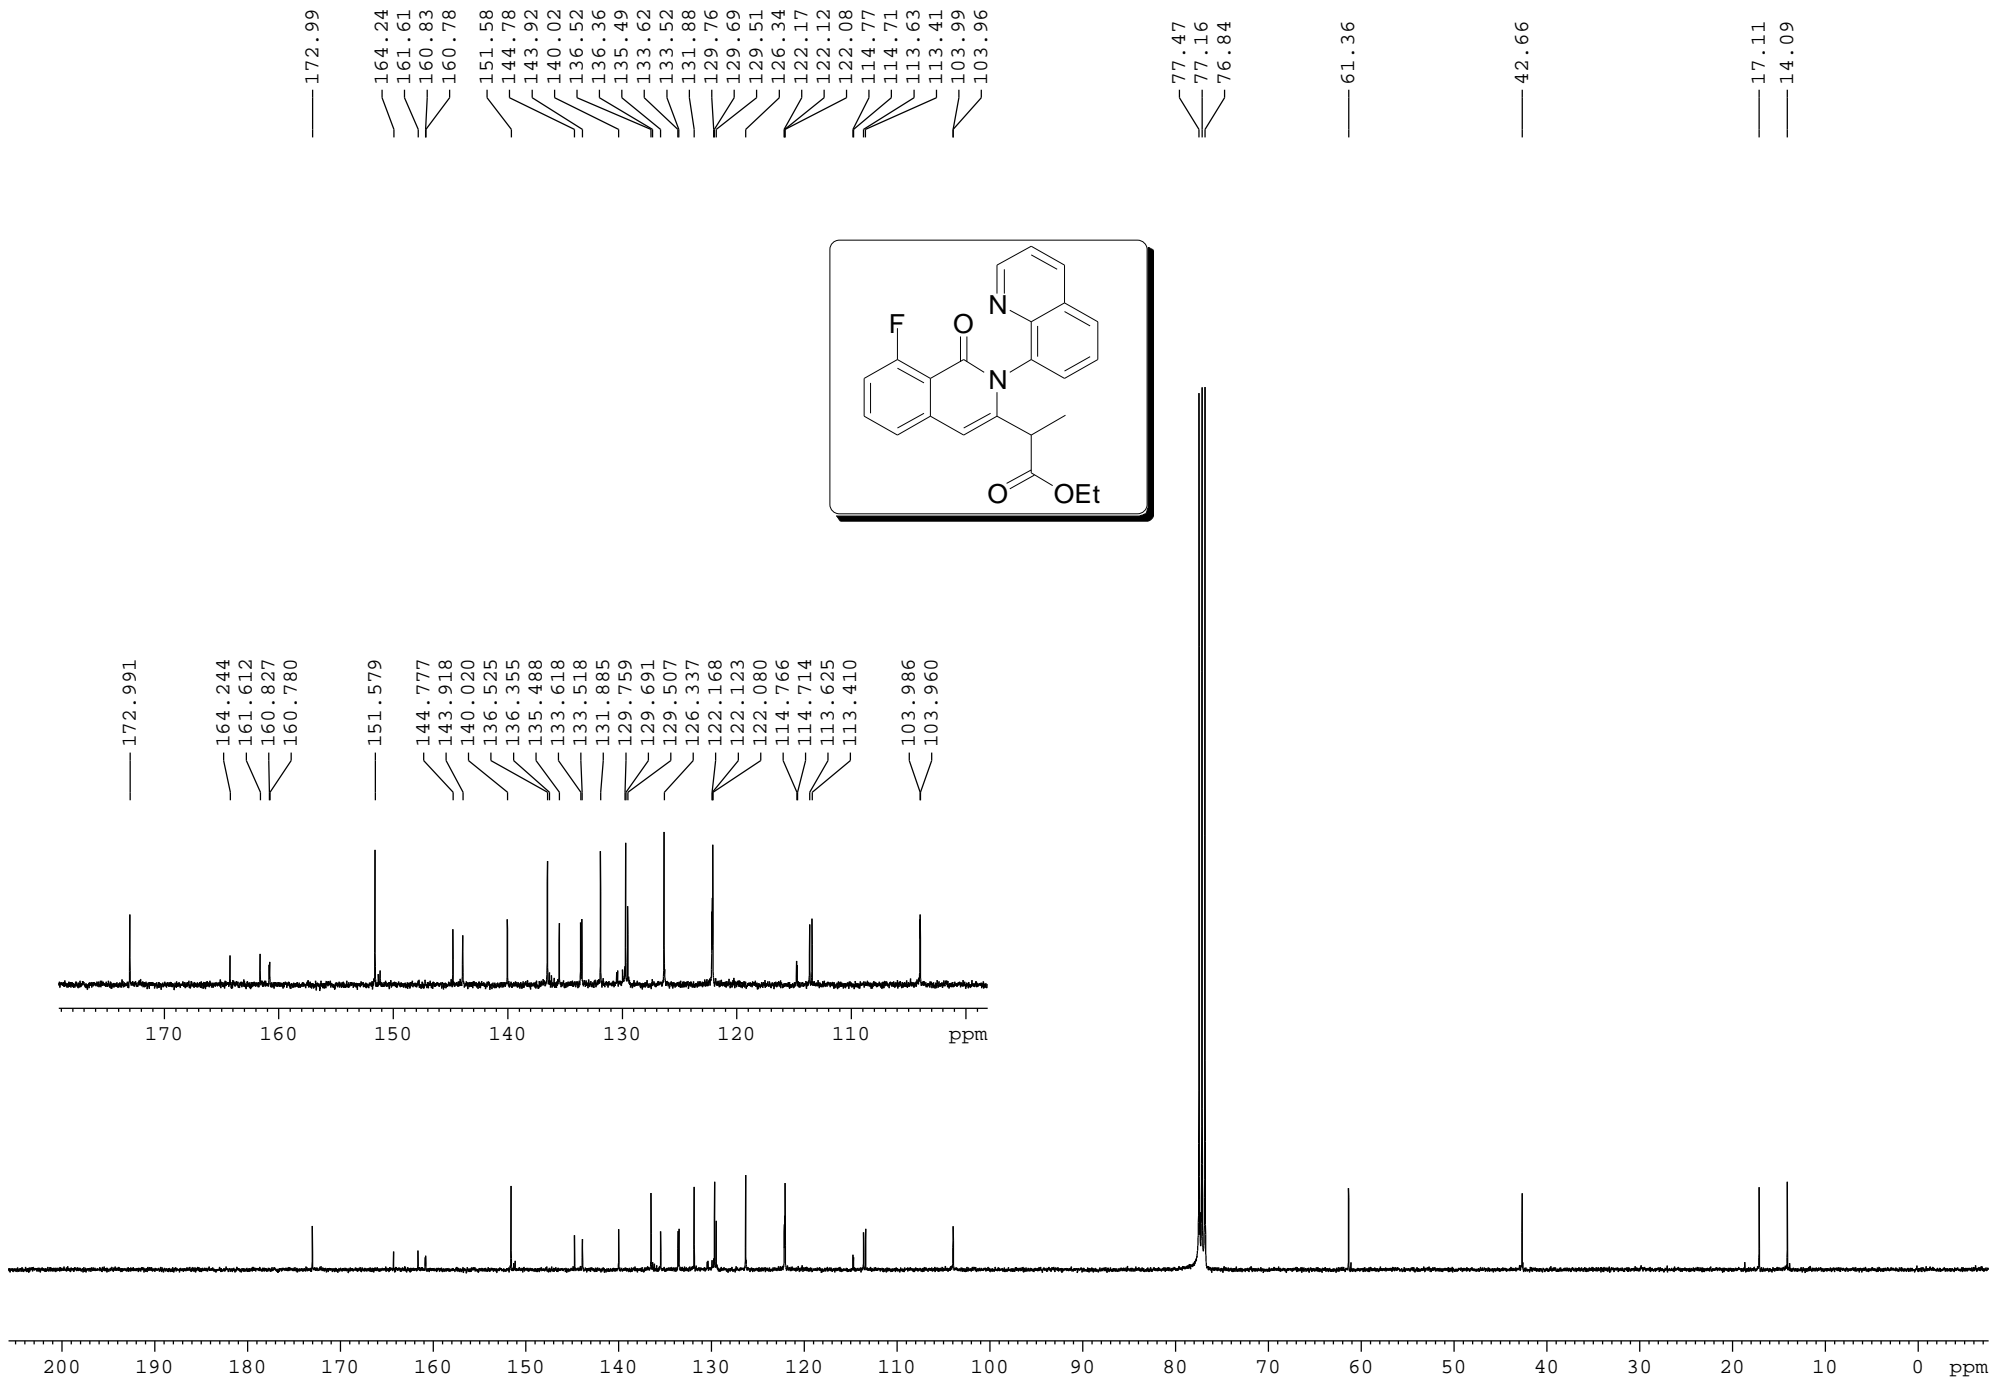

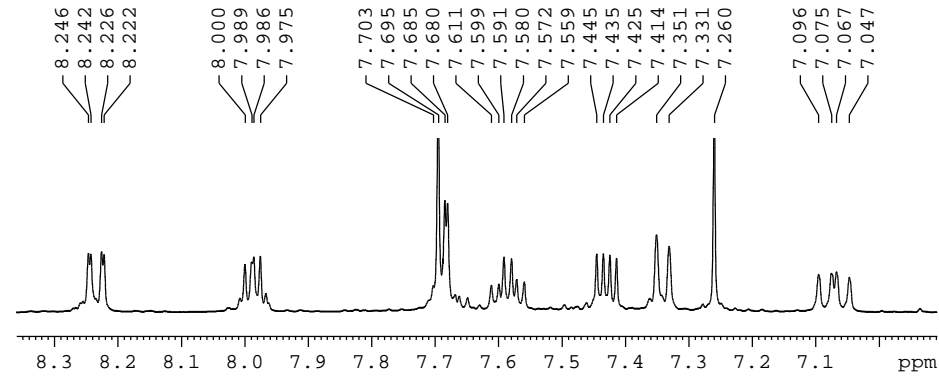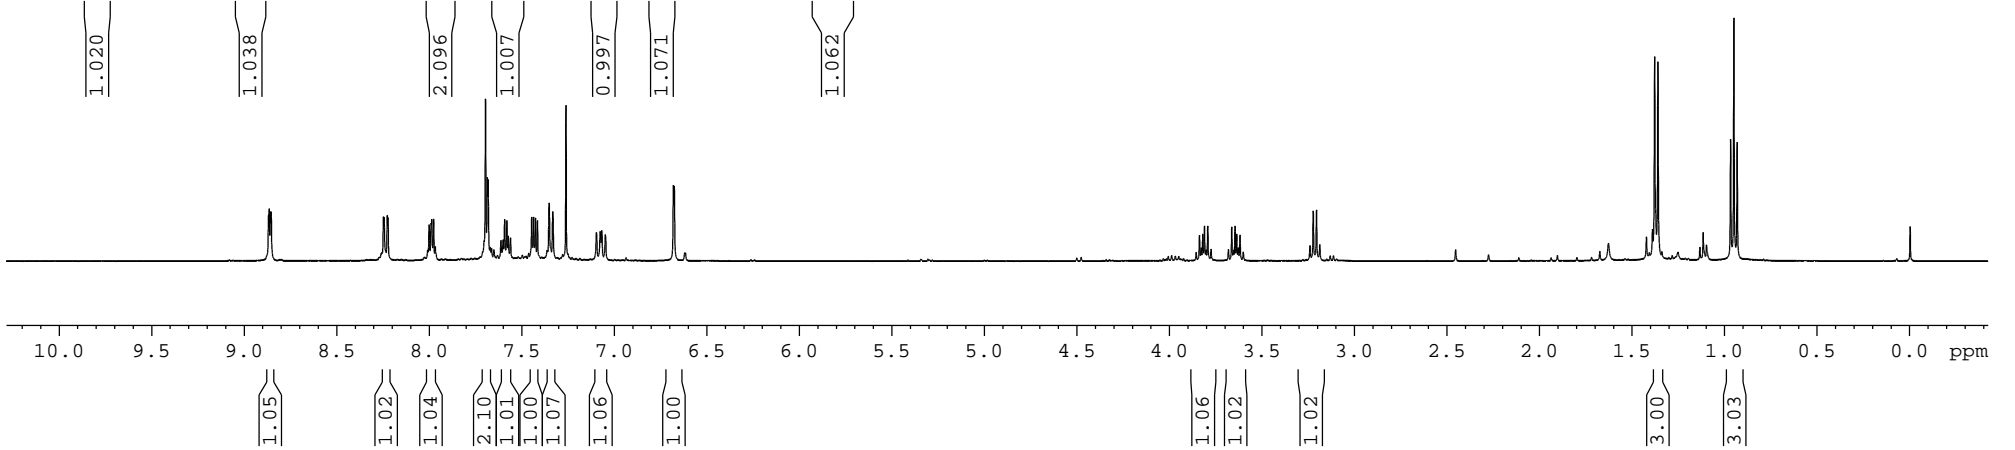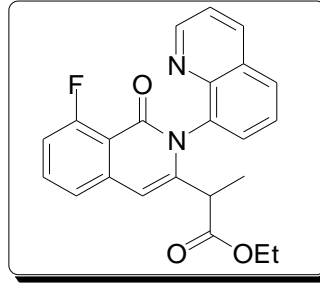

8.8674  
8.8634  
8.8572  
8.8530  
8.2464  
8.2424  
8.2257  
8.2217  
7.9995  
7.9890  
7.9856  
7.9753  
7.7026  
7.6947  
7.6847  
7.6804  
7.6114  
7.5995  
7.5915  
7.5796  
7.5715  
7.5595  
7.4453  
7.4348  
7.4245  
7.4141  
7.3509  
7.3311  
7.2599  
7.0955  
7.0752  
7.0672  
7.0471  
6.6794  
6.6746

3.8559  
3.8381  
3.8290  
3.8202  
3.8111  
3.8024  
3.7933  
3.7754  
3.6816  
3.6638  
3.6546  
3.6460  
3.6368  
3.6282  
3.6190  
3.6012  
3.2411  
3.2233  
3.2056  
3.1880

1.3783  
1.3606  
0.9679  
0.9501  
0.9323

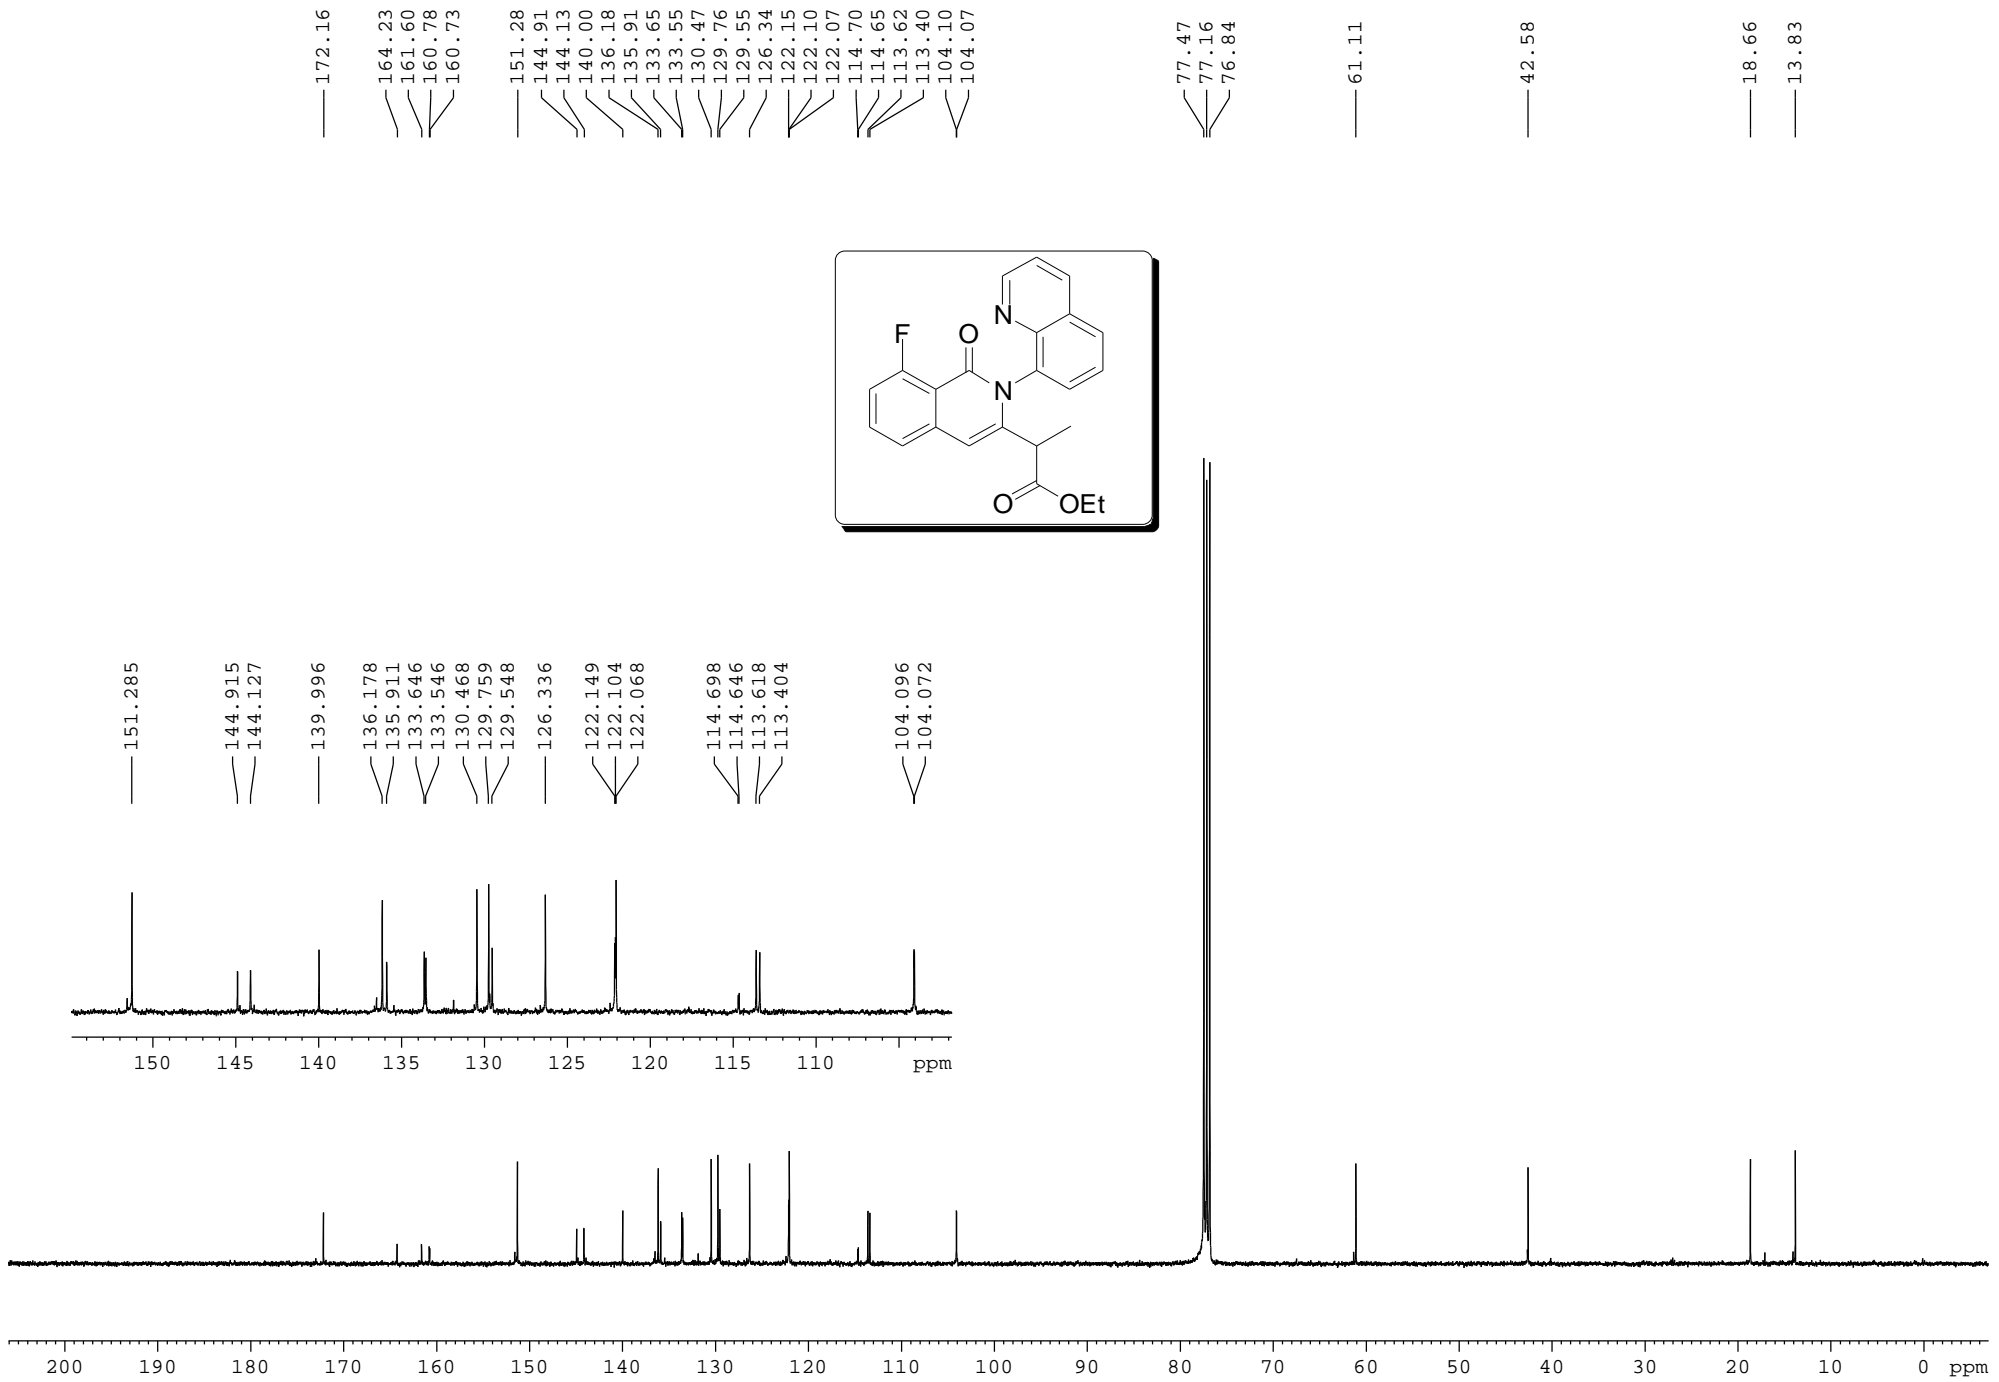

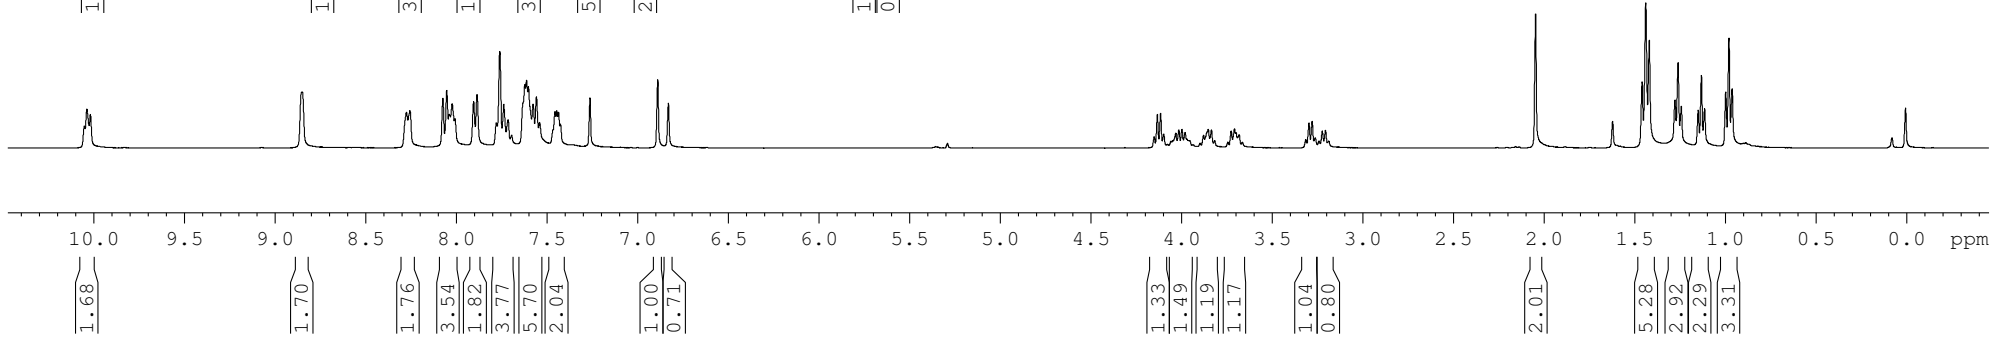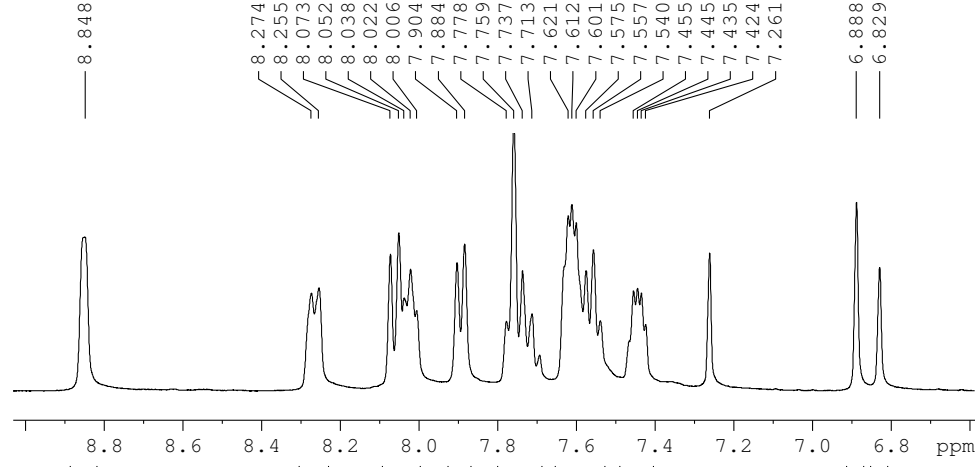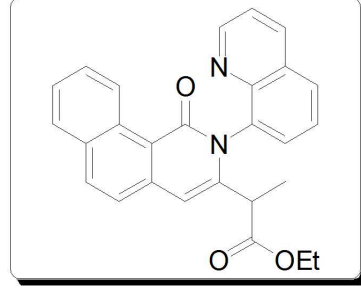

- 10.0510
- 10.0367
- 10.0171
- 8.8482
- 8.2737
- 8.2547
- 8.0731
- 8.0516
- 8.0381
- 8.0217
- 8.0063
- 7.9037
- 7.8844
- 7.7781
- 7.7592
- 7.7371
- 7.7131
- 7.6212
- 7.6116
- 7.6006
- 7.5753
- 7.5570
- 7.5395
- 7.4547
- 7.4447
- 7.4351
- 7.4239
- 7.2612
- 6.8879
- 6.8291

- 8.848
- 8.274
- 8.255
- 8.073
- 8.052
- 8.038
- 8.022
- 8.006
- 7.904
- 7.884
- 7.778
- 7.759
- 7.737
- 7.713
- 7.621
- 7.612
- 7.601
- 7.575
- 7.557
- 7.540
- 7.455
- 7.445
- 7.435
- 7.424
- 7.261
- 6.888
- 6.829

- 4.1521
- 4.1344
- 4.1167
- 4.0991
- 4.0590
- 4.0329
- 4.0160
- 3.9992
- 3.9815
- 3.9551
- 3.8802
- 3.8536
- 3.8360
- 3.8181
- 3.7455
- 3.7275
- 3.7094
- 3.7005
- 3.6831
- 3.6656
- 3.3158
- 3.2981
- 3.2806
- 3.2635
- 3.2420
- 3.2248
- 3.2070
- 3.1896
- 2.0482
- 1.4608
- 1.4404
- 1.4210
- 1.2794
- 1.2619
- 1.2441
- 1.1511
- 1.1334
- 1.1158
- 0.9990
- 0.9813
- 0.9637



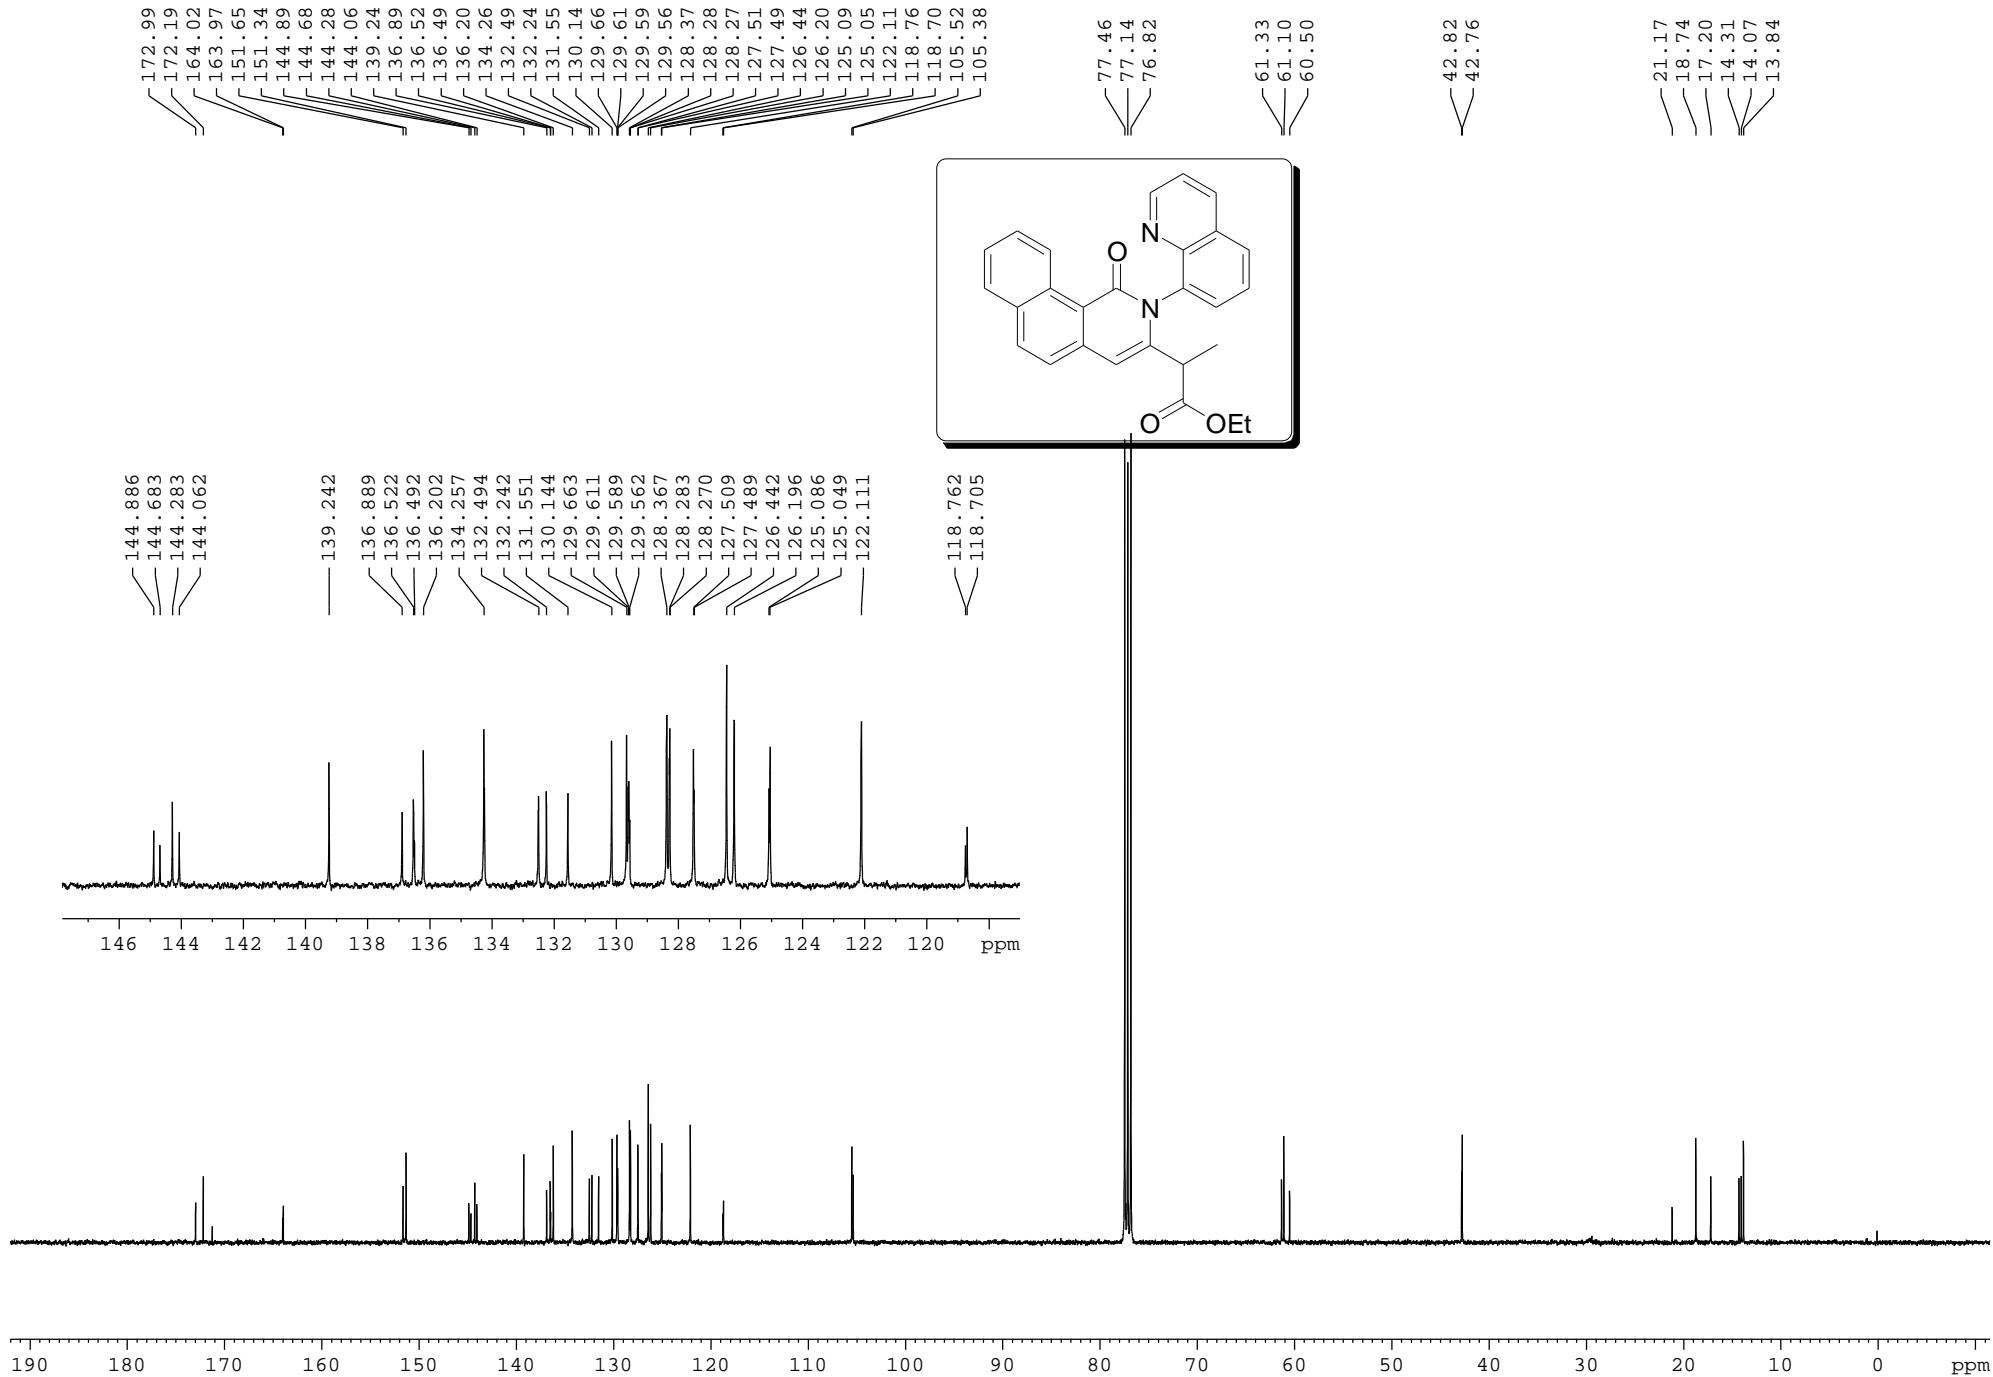

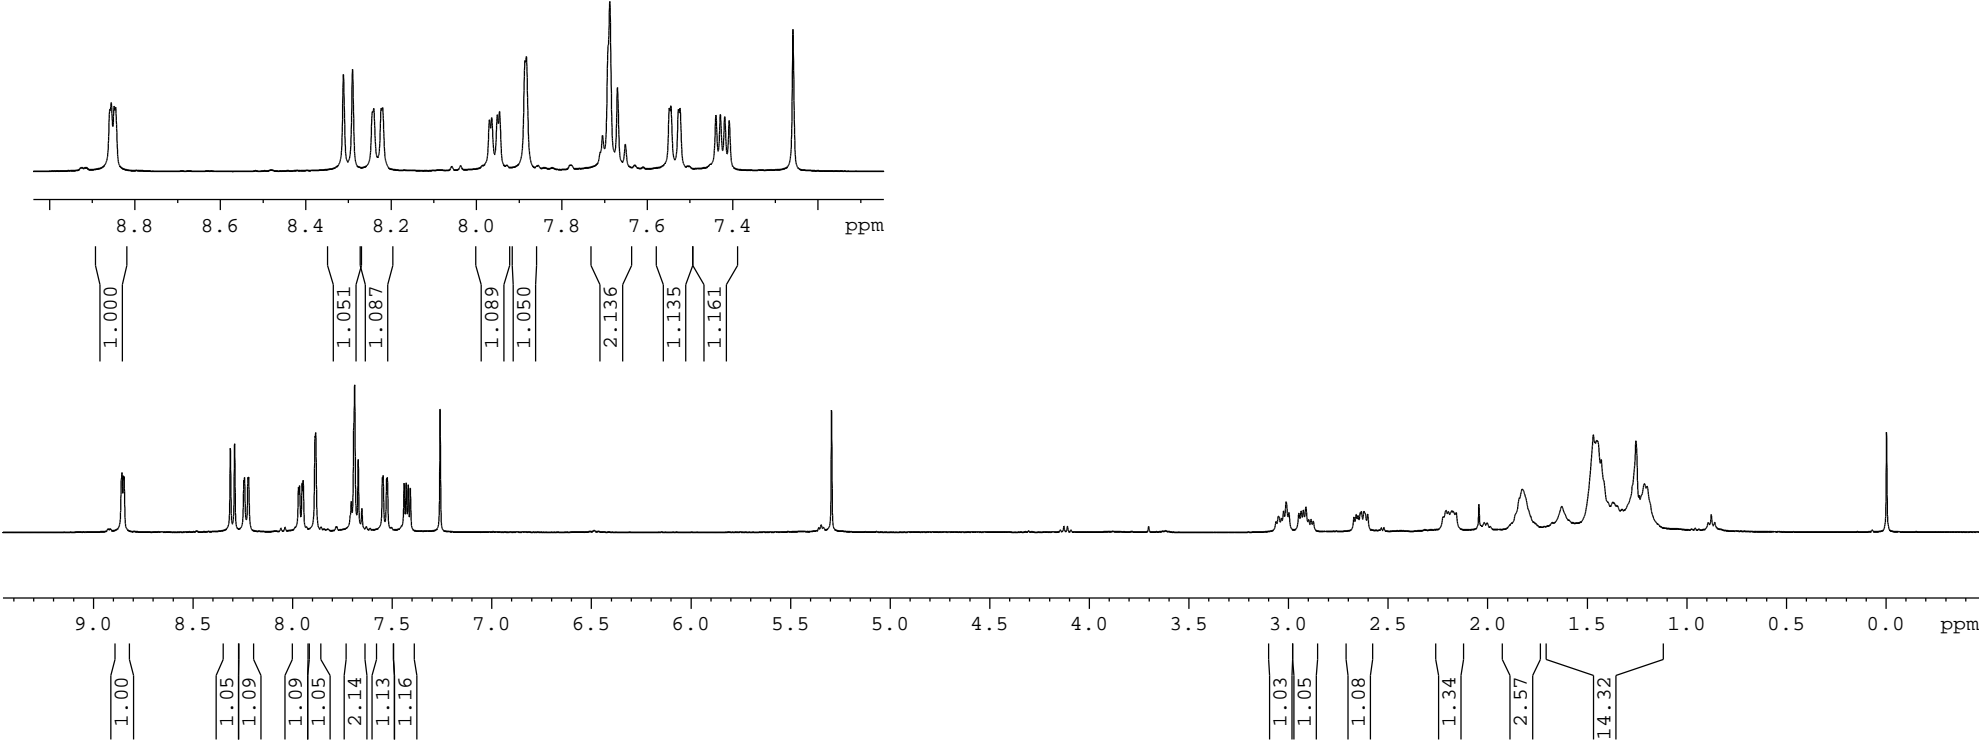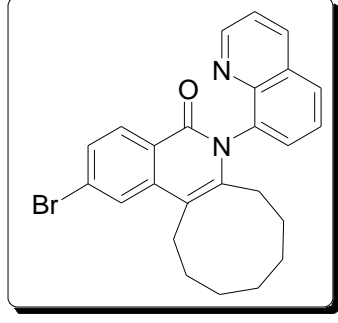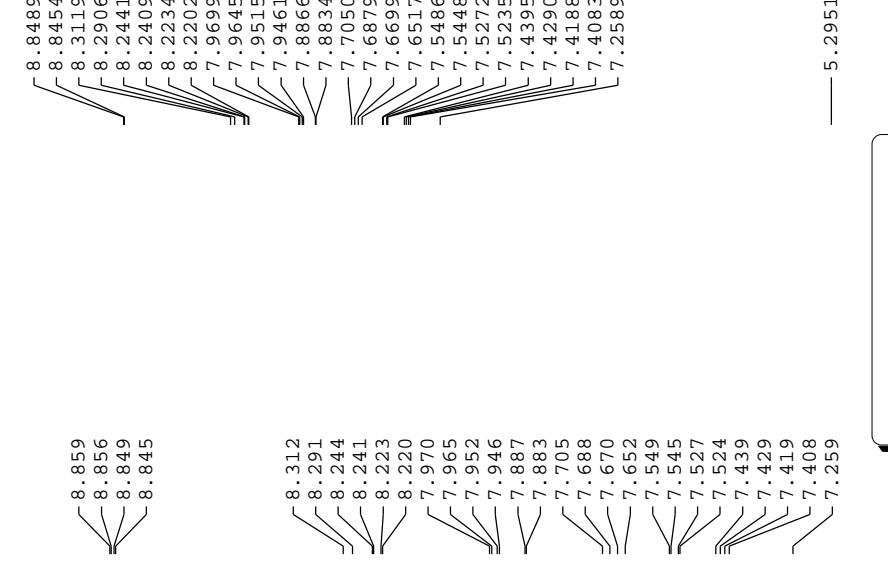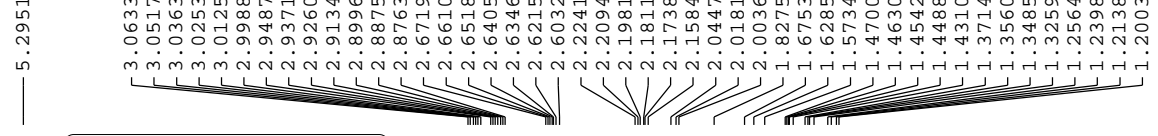

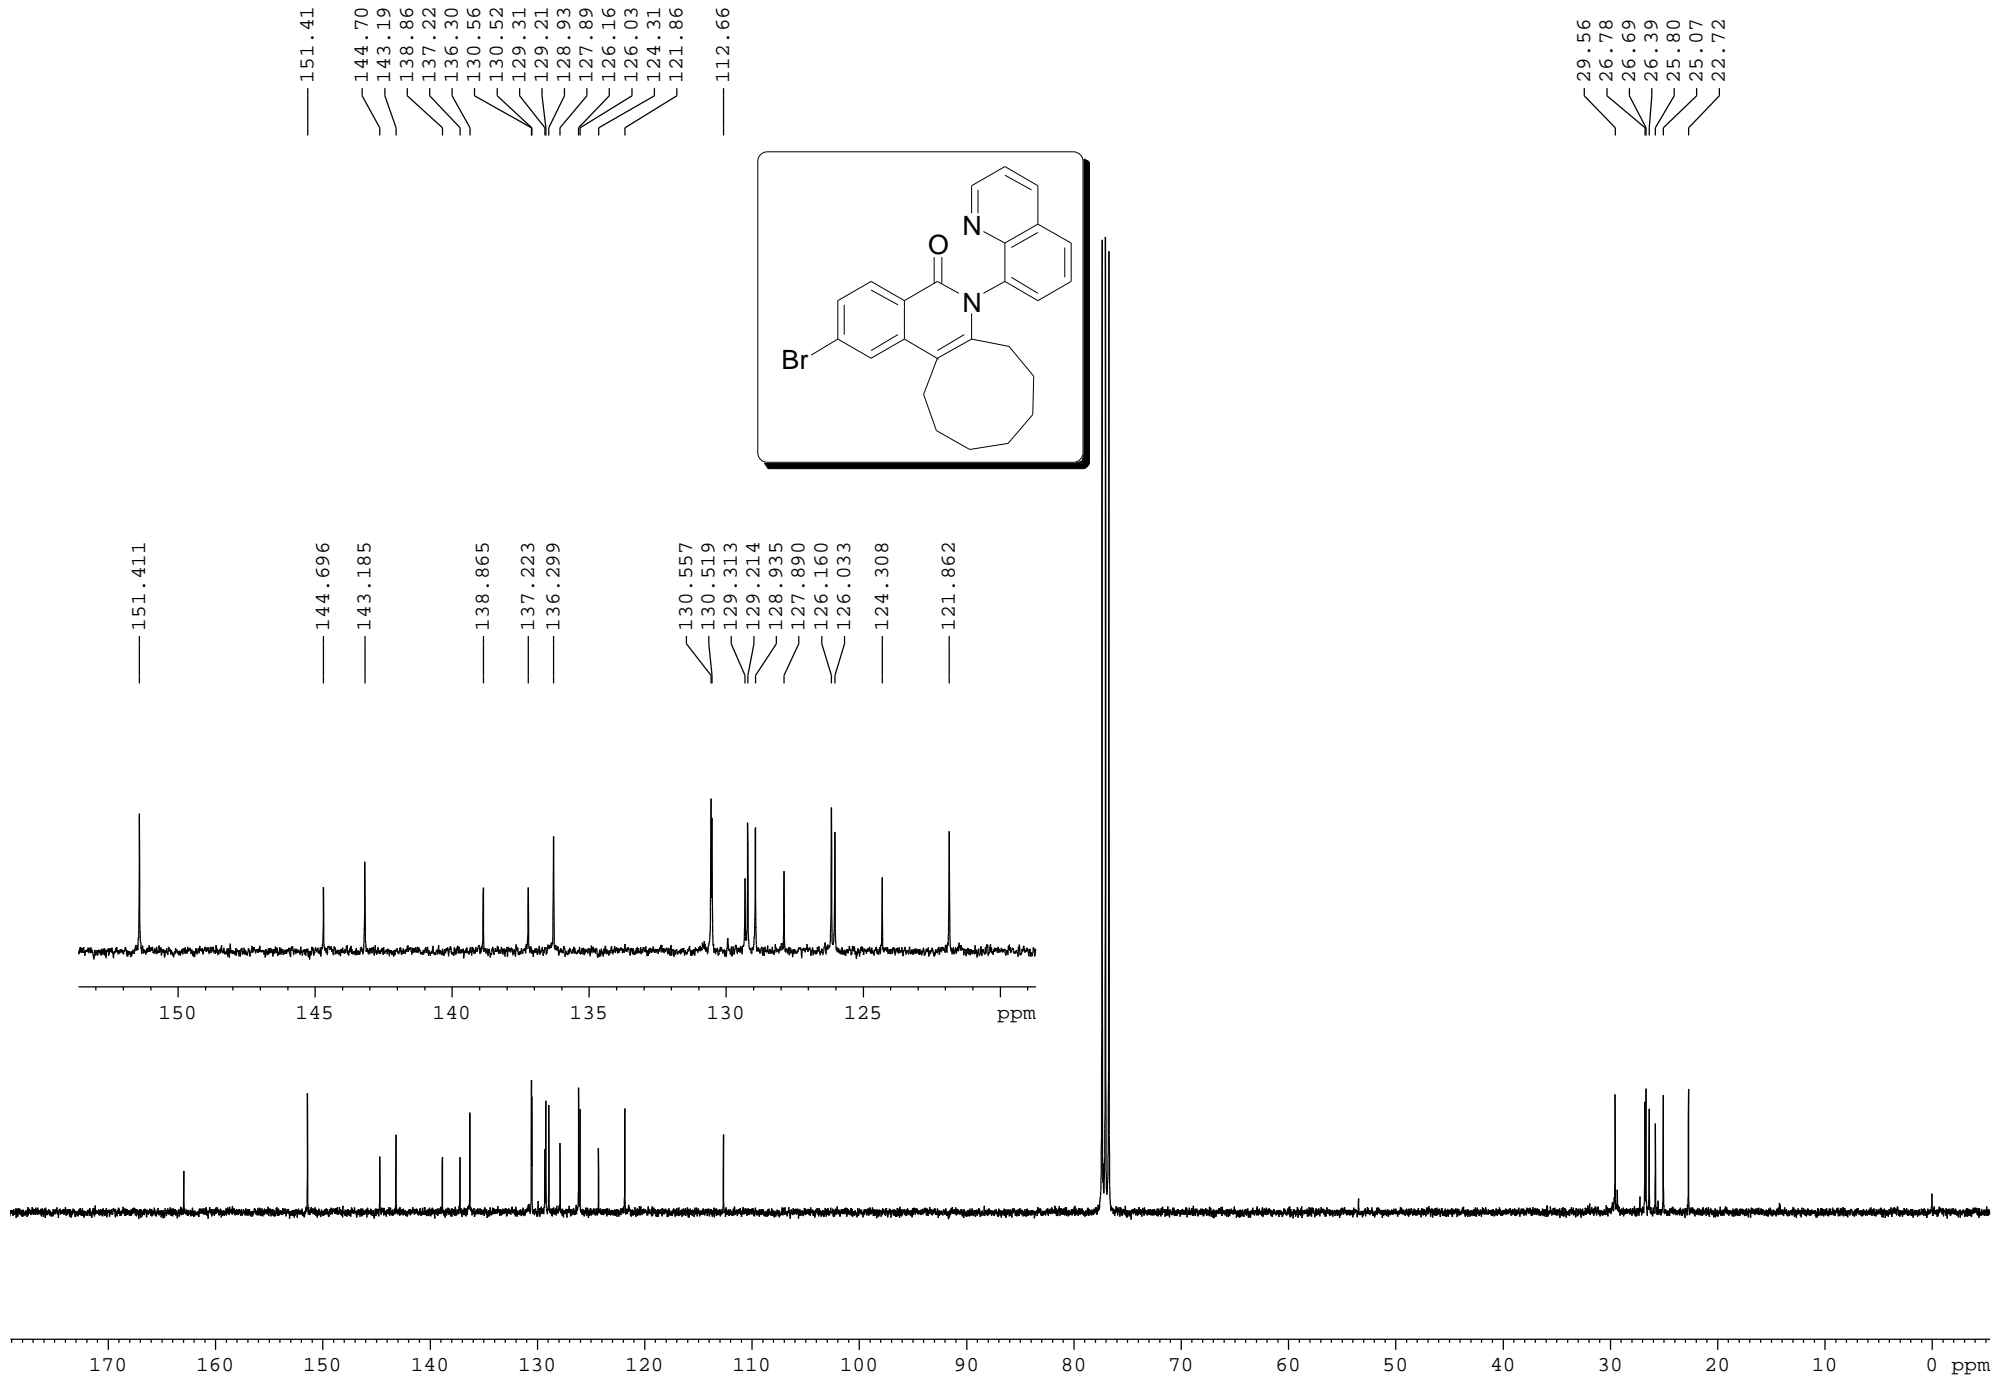

8.8970  
8.8931  
8.8868  
8.8829  
8.1882  
8.1844  
8.1675  
8.1636  
7.9504  
7.9481  
7.9319  
7.9296  
7.8282  
7.8264  
7.8080  
7.6526  
7.6332  
7.6135  
7.5285  
7.5098  
7.4911  
7.4180  
7.4077  
7.3972  
7.3877  
7.3720  
7.3430  
7.3240  
7.2613

4.8924  
4.8527  
4.6675  
4.6272  
4.1791  
4.1727  
4.1606  
4.1433  
4.1263

1.2765  
1.2668  
1.2490  
1.2311

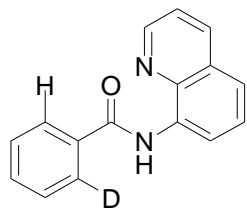

+

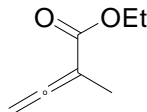

0.2 eq Co(acac)<sub>2</sub>  
2.0 eq Mn(OAc)<sub>2</sub>  
2.0 eq KOTf  
TFE, O<sub>2</sub>, 40 °C  
45 min

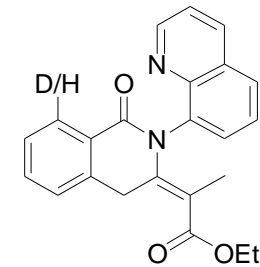

8.188  
8.184  
8.168  
8.164

7.950  
7.948  
7.932  
7.930

7.828  
7.826  
7.808

7.653  
7.633  
7.614

7.529  
7.510  
7.491

7.418  
7.408  
7.397  
7.388  
7.372  
7.343  
7.324

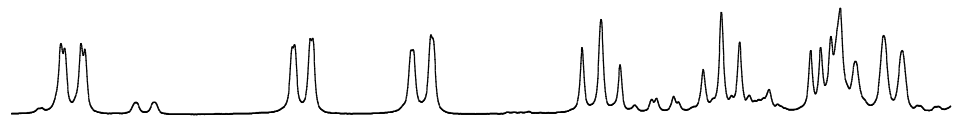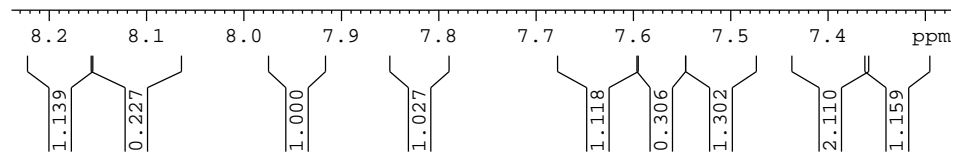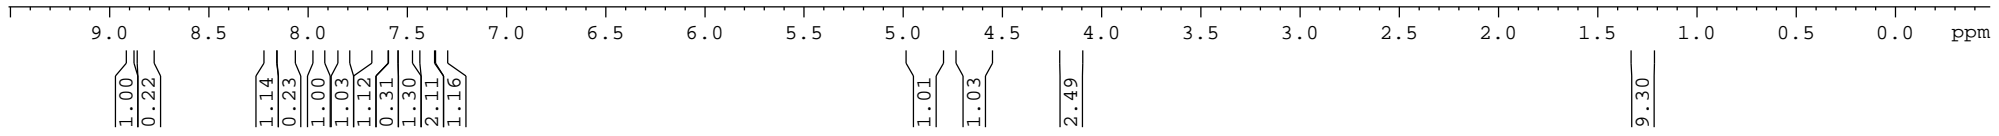

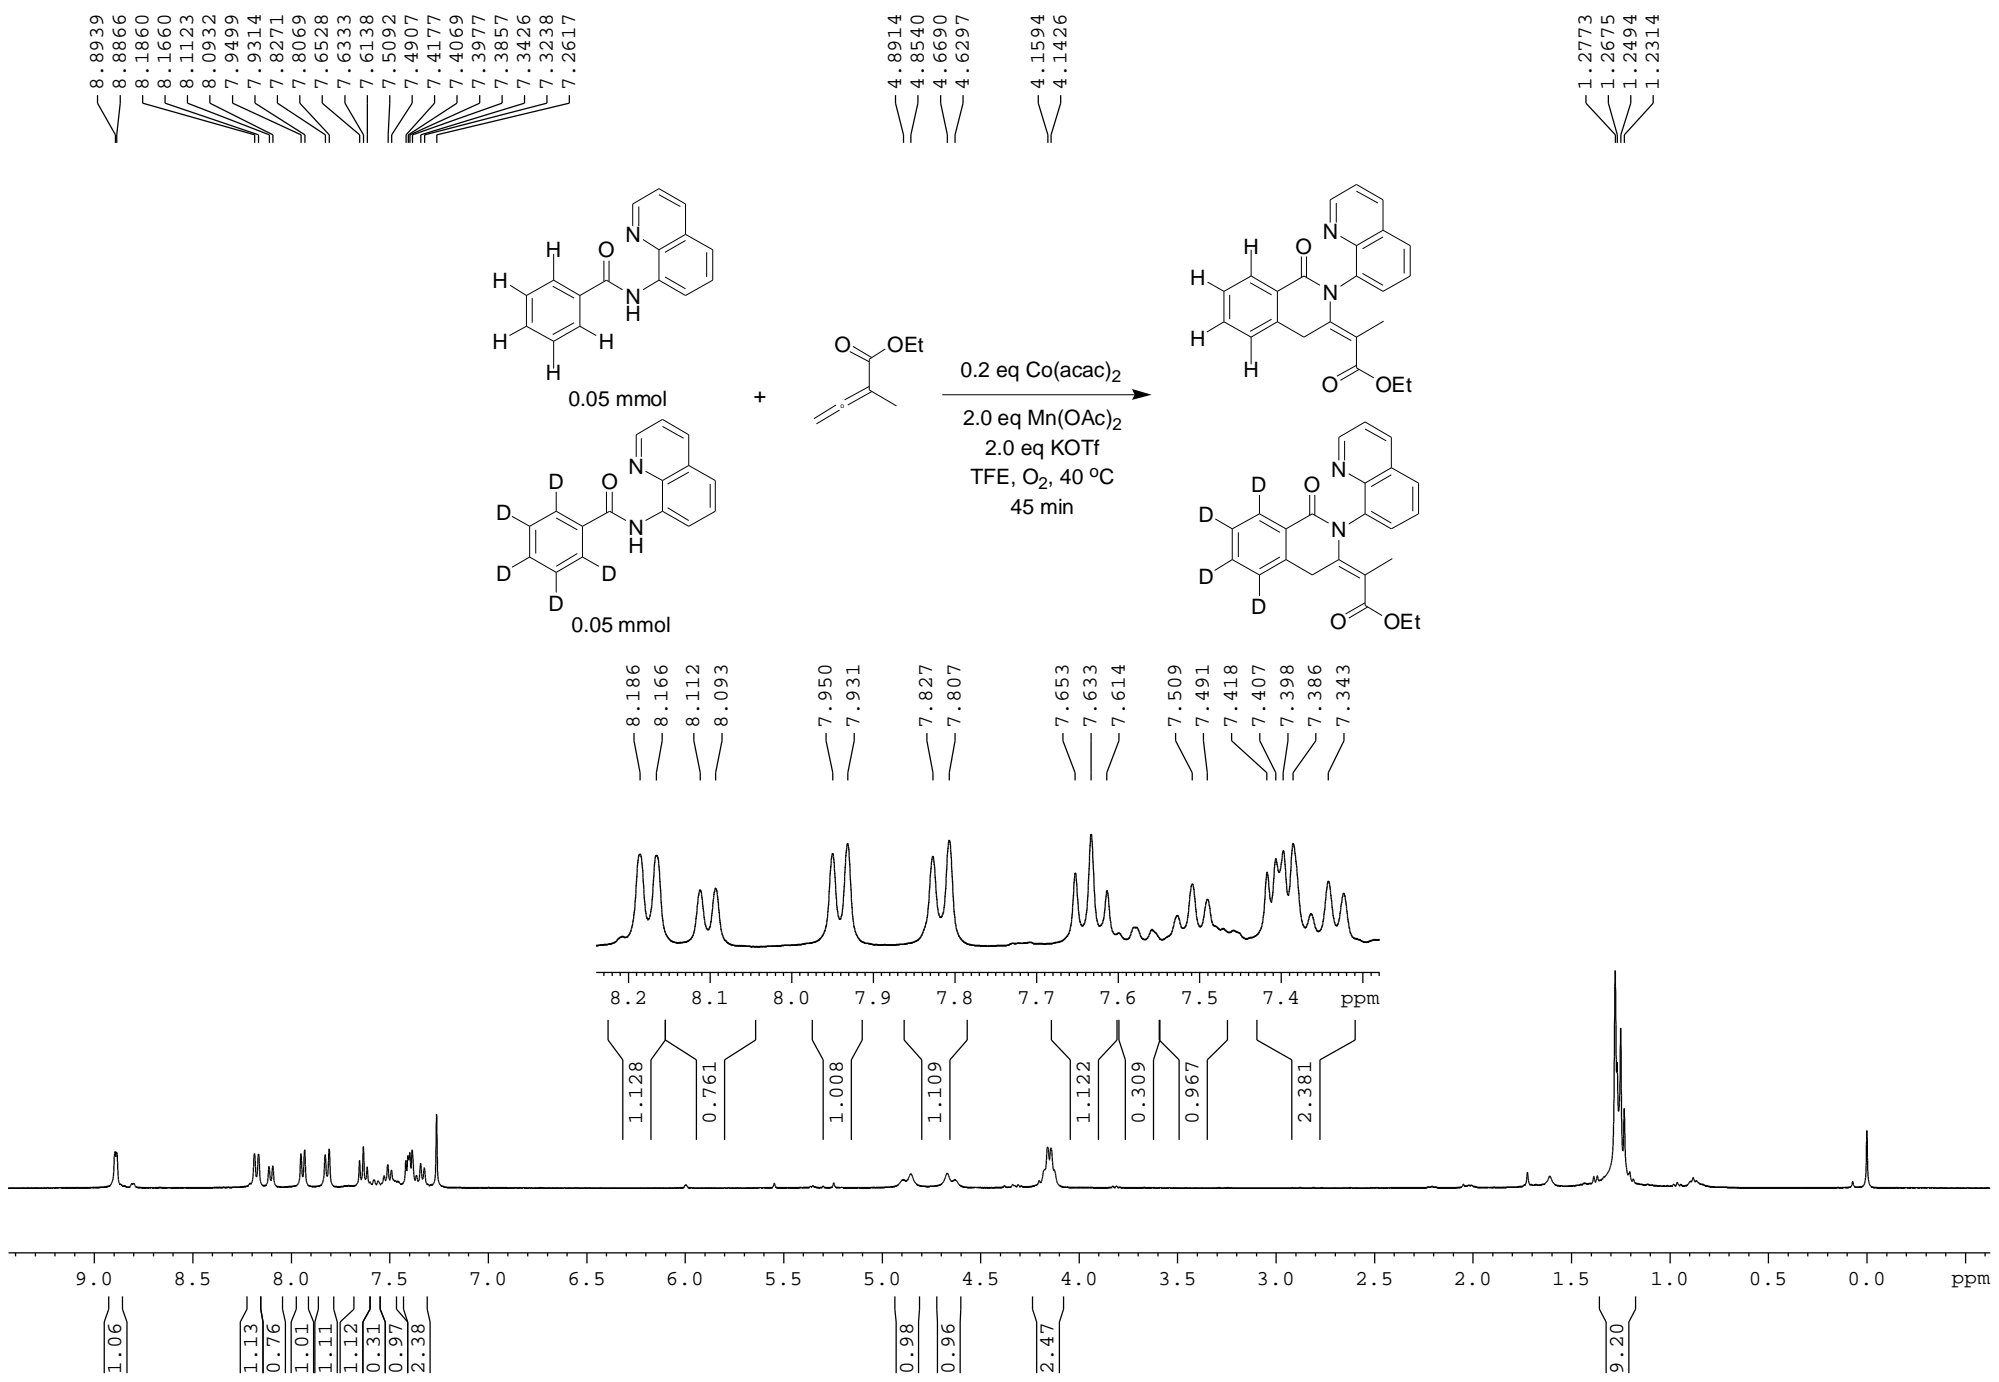

Supplement: c6qo00567e1.pdf [file c6qo00567e1.pdf]
